# Supplementary material for: Temporal Transcriptome Analysis Reveals Dynamic Gene Expression Patterns Driving β-Cell Maturation
Source: Frontiers journal article supplement (doi:10.3389/fcell.2021.648791), 2021-05-04
Supplement: Data_Sheet_2.PDF [file Data_Sheet_2.PDF]

## Functional categories

Associations between the defined functional categories and the ancestor terms in GO. BP = Biological Process, MF = Molecular Function, CC= Cellular Components. For each category, the numbers of GO terms/pathways and associated genes are reported in brackets.

### Adhesion, communication, aggregation and migration (129 terms, 587 genes)

| GOID       | Ontology | Term                                                            |
|------------|----------|-----------------------------------------------------------------|
| GO:0022610 | BP       | biological adhesion                                             |
| GO:0098636 | CC       | protein complex involved in cell adhesion                       |
| GO:0030054 | CC       | cell junction                                                   |
| GO:0050839 | MF       | cell adhesion molecule binding                                  |
| GO:0098631 | MF       | protein binding involved in cell adhesion                       |
| GO:0030370 | MF       | intercellular adhesion molecule-3 receptor binding              |
| GO:0071135 | CC       | alpha7-beta1 integrin-focal adhesion kinase complex             |
| GO:0071065 | CC       | alpha9-beta1 integrin-vascular cell adhesion molecule-1 complex |
| GO:0098743 | BP       | cell aggregation                                                |
| GO:0030155 | BP       | regulation of cell adhesion                                     |
| GO:0034330 | BP       | cell junction organization                                      |
| GO:1901888 | BP       | regulation of cell junction assembly                            |
| GO:1903391 | BP       | regulation of adherens junction organization                    |
| GO:0007154 | BP       | cell communication                                              |
| GO:0010646 | BP       | regulation of cell communication                                |
| GO:0040011 | BP       | locomotion                                                      |
| GO:0040012 | BP       | regulation of locomotion                                        |
| GO:0008037 | BP       | cell recognition                                                |
| GO:0045202 | CC       | synapse                                                         |
| GO:0006928 | BP       | movement of cell or subcellular component                       |
| GO:0033622 | BP       | integrin activation                                             |
| GO:0033623 | BP       | regulation of integrin activation                               |
| GO:0045499 | MF       | chemorepellent activity                                         |
| GO:0031252 | CC       | cell leading edge                                               |

### Binding (157 terms, 1715 genes)

| GOID       | Ontology | Term                  |
|------------|----------|-----------------------|
| GO:0005488 | MF       | binding               |
| GO:0051098 | BP       | regulation of binding |

### Biological regulation and behavior (92 terms, 521 genes)

| GOID       | Ontology | Term                         |
|------------|----------|------------------------------|
| GO:0065007 | BP       | biological regulation        |
| GO:0007610 | BP       | behavior                     |
| GO:0001775 | BP       | cell activation              |
| GO:0048511 | BP       | rhythmic process             |
| GO:0098772 | MF       | molecular function regulator |

Biosynthesis and Catalytical activity (275 terms, 1125 genes)

| GOID       | Ontology | Term                                       |
|------------|----------|--------------------------------------------|
| GO:0009058 | BP       | biosynthetic process                       |
| GO:0003824 | MF       | catalytic activity                         |
| GO:0009889 | BP       | regulation of biosynthetic process         |
| GO:0050790 | BP       | regulation of catalytic activity           |
| GO:0030234 | MF       | enzyme regulator activity                  |
| GO:0005085 | MF       | guanyl-nucleotide exchange factor activity |
| GO:1902494 | CC       | catalytic complex                          |

Cell cycle, proliferation, growth and death (306 terms, 792 genes)

| GOID       | Ontology | Term                             |
|------------|----------|----------------------------------|
| GO:0097189 | CC       | apoptotic body                   |
| GO:0043293 | CC       | apoptosome                       |
| GO:0007049 | BP       | cell cycle                       |
| GO:0008219 | BP       | cell death                       |
| GO:0008283 | BP       | cell proliferation               |
| GO:0040007 | BP       | growth                           |
| GO:0022403 | BP       | cell cycle phase                 |
| GO:0010941 | BP       | regulation of cell death         |
| GO:0051726 | BP       | regulation of cell cycle         |
| GO:0042127 | BP       | regulation of cell proliferation |
| GO:0040008 | BP       | regulation of growth             |
| GO:0030496 | CC       | midbody                          |
| GO:0005819 | CC       | spindle                          |

Cellular component organization or biogenesis (175 terms, 1427 genes)

| GOID       | Ontology | Term                                                        |
|------------|----------|-------------------------------------------------------------|
| GO:0071840 | BP       | cellular component organization or biogenesis               |
| GO:0032991 | CC       | macromolecular complex                                      |
| GO:0051128 | BP       | regulation of cellular component organization               |
| GO:0044087 | BP       | regulation of cellular component biogenesis                 |
| GO:0007163 | BP       | establishment or maintenance of cell polarity               |
| GO:0051301 | BP       | cell division                                               |
| GO:0051302 | BP       | regulation of cell division                                 |
| GO:0045177 | CC       | apical part of cell                                         |
| GO:0032878 | BP       | regulation of establishment or maintenance of cell polarity |
| GO:0032970 | BP       | regulation of actin filament-based process                  |
| GO:0005198 | MF       | structural molecule activity                                |
| GO:0042995 | CC       | cell projection                                             |
| GO:0005576 | CC       | extracellular region                                        |
| GO:0031012 | CC       | extracellular matrix                                        |
| GO:0032153 | CC       | cell division site                                          |
| GO:0005622 | CC       | intracellular                                               |
| GO:0031975 | CC       | envelope                                                    |
| GO:0071944 | CC       | cell periphery                                              |

Developmental process and reproduction (423 terms, 931 genes)

| GOID       | Ontology | Term                                |
|------------|----------|-------------------------------------|
| GO:0032502 | BP       | developmental process               |
| GO:0050793 | BP       | regulation of developmental process |
| GO:0000003 | BP       | reproduction                        |
| GO:0022414 | BP       | reproductive process                |
| GO:2000241 | BP       | regulation of reproductive process  |

Environmental information processing, response to stimulus and signaling (436 terms, 1161 genes)

| GOID       | Ontology | Term                               |
|------------|----------|------------------------------------|
| GO:0050896 | BP       | response to stimulus               |
| GO:0023052 | BP       | signaling                          |
| GO:0048583 | BP       | regulation of response to stimulus |
| GO:0023051 | BP       | regulation of signaling            |
| GO:0001816 | BP       | cytokine production                |
| GO:0001817 | BP       | regulation of cytokine production  |
| GO:0060300 | BP       | regulation of cytokine activity    |
| GO:0005125 | MF       | cytokine activity                  |
| GO:0060089 | MF       | molecular transducer activity      |
| GO:0030545 | MF       | receptor regulator activity        |
| GO:0043235 | CC       | receptor complex                   |

Genetic Information process (464 terms, 1944 genes)

| GOID       | Ontology | Term                                                           |
|------------|----------|----------------------------------------------------------------|
| GO:0010467 | BP       | gene expression                                                |
| GO:0090304 | BP       | nucleic acid metabolic process                                 |
| GO:0019219 | BP       | regulation of nucleobase-containing compound metabolic process |
| GO:0010468 | BP       | regulation of gene expression                                  |
| GO:0005667 | CC       | transcription factor complex                                   |
| GO:0008134 | MF       | transcription factor binding                                   |
| GO:0030880 | CC       | RNA polymerase complex                                         |
| GO:0051983 | BP       | regulation of chromosome segregation                           |
| GO:0036369 | BP       | transcription factor catabolic process                         |
| GO:0001071 | MF       | nucleic acid binding transcription factor activity             |
| GO:0000988 | MF       | protein binding transcription factor activity                  |
| GO:0051101 | BP       | regulation of DNA binding                                      |
| GO:1902415 | BP       | regulation of mRNA binding                                     |
| GO:0003676 | MF       | nucleic acid binding                                           |
| GO:0060968 | BP       | regulation of gene silencing                                   |
| GO:0051276 | BP       | chromosome organization                                        |
| GO:0007059 | BP       | chromosome segregation                                         |
| GO:0033044 | BP       | regulation of chromosome organization                          |
| GO:0045182 | MF       | translation regulator activity                                 |
| GO:0004518 | MF       | nuclease activity                                              |
| GO:0003678 | MF       | DNA helicase activity                                          |
| GO:0003724 | MF       | RNA helicase activity                                          |

|            |    |                                   |
|------------|----|-----------------------------------|
| GO:0034061 | MF | DNA polymerase activity           |
| GO:0034062 | MF | RNA polymerase activity           |
| GO:0008173 | MF | RNA methyltransferase activity    |
| GO:0009008 | MF | DNA-methyltransferase activity    |
| GO:0019013 | CC | viral nucleocapsid                |
| GO:0005694 | CC | chromosome                        |
| GO:0005634 | CC | nucleus                           |
| GO:0042575 | CC | DNA polymerase complex            |
| GO:0030880 | CC | RNA polymerase complex            |
| GO:0032993 | CC | protein-DNA complex               |
| GO:0017053 | CC | transcriptional repressor complex |
| GO:0030529 | CC | ribonucleoprotein complex         |

Immune system (171 terms, 455 genes)

| GOID       | Ontology | Term                                |
|------------|----------|-------------------------------------|
| GO:0002376 | BP       | immune system process               |
| GO:0002682 | BP       | regulation of immune system process |

Localization and transport (291 terms, 844 genes)

| GOID       | Ontology | Term                       |
|------------|----------|----------------------------|
| GO:0051179 | BP       | localization               |
| GO:0005215 | MF       | transporter activity       |
| GO:0032879 | BP       | regulation of localization |
| GO:1990351 | CC       | transporter complex        |
| GO:0016247 | MF       | channel regulator activity |
| GO:0012505 | CC       | endomembrane system        |

Membrane (98 terms, 1223 genes)

| GOID       | Ontology | Term                                       |
|------------|----------|--------------------------------------------|
| GO:0016020 | CC       | membrane                                   |
| GO:0061024 | BP       | membrane organization                      |
| GO:0042391 | BP       | regulation of membrane potential           |
| GO:1903729 | BP       | regulation of plasma membrane organization |
| GO:0010549 | BP       | regulation of membrane disassembly         |
| GO:0090559 | BP       | regulation of membrane permeability        |
| GO:0003254 | BP       | regulation of membrane depolarization      |
| GO:0022406 | BP       | membrane docking                           |
| GO:0005604 | CC       | basement membrane                          |
| GO:0032154 | CC       | cleavage furrow                            |
| GO:0031975 | CC       | envelope                                   |

Metabolism (356 terms, 1474 genes)

| GOID       | Ontology | Term                            |
|------------|----------|---------------------------------|
| GO:0008152 | BP       | metabolic process               |
| GO:0019222 | BP       | regulation of metabolic process |

Organelle (60 terms, 719 genes)

| GOID       | Ontology | Term                                 |
|------------|----------|--------------------------------------|
| GO:0043226 | CC       | organelle                            |
| GO:0033043 | BP       | regulation of organelle organization |
| GO:0006996 | BP       | organelle organization               |

System process (68 terms, 298 genes)

| GOID       | Ontology | Term                            |
|------------|----------|---------------------------------|
| GO:0003008 | BP       | system process                  |
| GO:0044057 | BP       | regulation of system process    |
| GO:0048771 | BP       | tissue remodeling               |
| GO:0034103 | BP       | regulation of tissue remodeling |
| GO:0001503 | BP       | ossification                    |
| GO:0030278 | BP       | regulation of ossification      |
| GO:0097458 | CC       | neuron part                     |
| GO:0043209 | CC       | myelin sheath                   |
| GO:0043292 | CC       | contractile fiber               |

**GSIS processes**

Associations between the defined GSIS processes and the ancestor terms in GO. BP = Biological Process, MF = Molecular Function, CC= Cellular Components. For each GSIS process, the number of GO terms/pathways and genes associated is reported in brackets.

Calcium-mediated processing (15 terms, 142 genes)

| GOID       | Ontology | Term                                               |
|------------|----------|----------------------------------------------------|
| GO:0019722 | BP       | calcium-mediated signaling                         |
| GO:0051592 | BP       | response to calcium ion                            |
| GO:0005509 | MF       | calcium ion binding                                |
| GO:0030899 | MF       | calcium-dependent ATPase activity                  |
| GO:0048306 | MF       | calcium-dependent protein binding                  |
| GO:1901876 | BP       | regulation of calcium ion binding                  |
| GO:0090534 | CC       | calcium ion-transporting ATPase complex            |
| GO:0048763 | MF       | calcium-induced calcium release activity           |
| GO:0050848 | BP       | regulation of calcium-mediated signaling           |
| GO:0097231 | BP       | cell motility in response to calcium ion           |
| GO:0010857 | MF       | calcium-dependent protein kinase activity          |
| GO:0051282 | BP       | regulation of sequestering of calcium ion          |
| GO:0072732 | BP       | cellular response to calcium ion starvation        |
| GO:1903610 | BP       | regulation of calcium-dependent ATPase activity    |
| GO:0007223 | BP       | Wnt signaling pathway, calcium modulating pathway  |
| GO:0030925 | BP       | calcium incorporation into metallo-oxygen cluster  |
| GO:0046586 | BP       | regulation of calcium-dependent cell-cell adhesion |

|            |    |                                                                                      |
|------------|----|--------------------------------------------------------------------------------------|
| GO:0010858 | MF | calcium-dependent protein kinase regulator activity                                  |
| GO:0004198 | MF | calcium-dependent cysteine-type endopeptidase activity                               |
| GO:0005954 | CC | calcium- and calmodulin-dependent protein kinase complex                             |
| GO:0007204 | BP | positive regulation of cytosolic calcium ion concentration                           |
| GO:0051481 | BP | negative regulation of cytosolic calcium ion concentration                           |
| GO:1901894 | BP | regulation of calcium-transporting ATPase activity                                   |
| GO:0008294 | MF | calcium- and calmodulin-responsive adenylate cyclase activity                        |
| GO:0004723 | MF | calcium-dependent protein serine/threonine phosphatase activity                      |
| GO:0008591 | BP | regulation of Wnt signaling pathway, calcium modulating pathway                      |
| GO:0010859 | MF | calcium-dependent cysteine-type endopeptidase inhibitor activity                     |
| GO:0075020 | BP | calcium or calmodulin-mediated activation of appressorium formation                  |
| GO:0008597 | MF | calcium-dependent protein serine/threonine phosphatase regulator activity            |
| GO:0048101 | MF | calcium- and calmodulin-regulated 3',5'-cyclic-GMP phosphodiesterase activity        |
| GO:0016339 | BP | calcium-dependent cell-cell adhesion via plasma membrane cell adhesion molecules     |
| GO:0075103 | BP | modulation by host of symbiont calcium or calmodulin-mediated signal transduction    |
| GO:0075133 | BP | modulation by symbiont of host calcium or calmodulin-mediated signal transduction    |
| GO:0016338 | BP | calcium-independent cell-cell adhesion via plasma membrane cell-adhesion molecules   |
| GO:0075177 | BP | regulation of calcium or calmodulin-mediated signal transduction in response to host |
| GO:0005955 | CC | calcineurin complex                                                                  |
| GO:0005000 | MF | vasopressin receptor activity                                                        |
| GO:0004683 | MF | calmodulin-dependent protein kinase activity                                         |
| GO:0005516 | MF | calmodulin binding                                                                   |
| GO:0005544 | MF | calcium-dependent phospholipid binding                                               |

*Glycolysis, Glucose processing, Pyruvate metabolism and TCA cycle (29 terms, 179 genes)*

| GOID       | Ontology | Term                                                   |
|------------|----------|--------------------------------------------------------|
| GO:0006848 | BP       | pyruvate transport                                     |
| GO:0009444 | BP       | pyruvate oxidation                                     |
| GO:1902912 | CC       | pyruvate kinase complex                                |
| GO:0004743 | MF       | pyruvate kinase activity                               |
| GO:0047112 | MF       | pyruvate oxidase activity                              |
| GO:0006090 | BP       | pyruvate metabolic process                             |
| GO:0019164 | MF       | pyruvate synthase activity                             |
| GO:0004736 | MF       | pyruvate carboxylase activity                          |
| GO:0045254 | CC       | pyruvate dehydrogenase complex                         |
| GO:0004737 | MF       | pyruvate decarboxylase activity                        |
| GO:0004738 | MF       | pyruvate dehydrogenase activity                        |
| GO:0006849 | BP       | plasma membrane pyruvate transport                     |
| GO:0034604 | MF       | pyruvate dehydrogenase (NAD <sup>+</sup> ) activity    |
| GO:0050408 | MF       | [pyruvate kinase]-phosphatase activity                 |
| GO:1903302 | BP       | regulation of pyruvate kinase activity                 |
| GO:0050243 | MF       | pyruvate dehydrogenase (NADP <sup>+</sup> ) activity   |
| GO:0019450 | BP       | L-cysteine catabolic process to pyruvate               |
| GO:0045250 | CC       | cytosolic pyruvate dehydrogenase complex               |
| GO:0034603 | MF       | pyruvate dehydrogenase [NAD(P) <sup>+</sup> ] activity |

|            |    |                                                                      |
|------------|----|----------------------------------------------------------------------|
| GO:0052737 | MF | pyruvate dehydrogenase (quinone) activity                            |
| GO:0019687 | BP | pyruvate biosynthetic process from acetate                           |
| GO:0043873 | MF | pyruvate-flavodoxin oxidoreductase activity                          |
| GO:0050244 | MF | pyruvate oxidase (CoA-acetylating) activity                          |
| GO:0050833 | MF | pyruvate transmembrane transporter activity                          |
| GO:0009078 | BP | pyruvate family amino acid metabolic process                         |
| GO:0019272 | BP | L-alanine biosynthetic process from pyruvate                         |
| GO:0019480 | BP | L-alanine oxidation to pyruvate via D-alanine                        |
| GO:1902361 | BP | mitochondrial pyruvate transmembrane transport                       |
| GO:0009079 | BP | pyruvate family amino acid biosynthetic process                      |
| GO:0019661 | BP | glucose catabolic process to lactate via pyruvate                    |
| GO:0045253 | CC | pyruvate dehydrogenase (lipoamide) phosphatase complex               |
| GO:0004741 | MF | [pyruvate dehydrogenase (lipoamide)] phosphatase activity            |
| GO:0010510 | BP | regulation of acetyl-CoA biosynthetic process from pyruvate          |
| GO:0004740 | MF | pyruvate dehydrogenase (acetyl-transferring) kinase activity         |
| GO:0005477 | MF | pyruvate secondary active transmembrane transporter activity         |
| GO:0045249 | CC | cytosol pyruvate dehydrogenase (lipoamide) phosphatase complex       |
| GO:0019909 | MF | [pyruvate dehydrogenase (lipoamide)] phosphatase regulator activity  |
| GO:0019451 | BP | L-cysteine catabolic process to pyruvate, using cysteine dioxygenase |
| GO:0019910 | CC | mitochondrial pyruvate dehydrogenase (lipoamide) phosphatase complex |
| GO:0019643 | BP | reductive tricarboxylic acid cycle                                   |
| GO:0045239 | CC | tricarboxylic acid cycle enzyme complex                              |
| GO:0045246 | CC | cytosolic tricarboxylic acid cycle enzyme complex                    |
| GO:0006097 | BP | glyoxylate cycle                                                     |
| GO:0006101 | BP | citrate metabolic process                                            |
| GO:0006107 | BP | oxaloacetate metabolic process                                       |
| GO:0006103 | BP | 2-oxoglutarate metabolic process                                     |
| GO:0015140 | MF | malate transmembrane transporter activity                            |
| GO:0006102 | BP | isocitrate metabolic process                                         |
| GO:0006105 | BP | succinate metabolic process                                          |
| GO:0009361 | CC | succinate-CoA ligase complex (ADP-forming)                           |
| GO:0015138 | MF | fumarate transmembrane transporter activity                          |
| GO:0015139 | MF | alpha-ketoglutarate transmembrane transporter activity               |
| GO:0006084 | BP | acetyl-CoA metabolic process                                         |
| GO:0016421 | MF | CoA carboxylase activity                                             |
| GO:0005536 | MF | glucose binding                                                      |
| GO:0015758 | BP | glucose transport                                                    |
| GO:0009749 | BP | response to glucose                                                  |
| GO:0042593 | BP | glucose homeostasis                                                  |
| GO:0046562 | MF | glucose oxidase activity                                             |
| GO:0061490 | BP | glucose import into cell                                             |
| GO:0006006 | BP | glucose metabolic process                                            |
| GO:0015304 | MF | glucose uniporter activity                                           |
| GO:1990350 | CC | glucose transporter complex                                          |
| GO:0015760 | BP | glucose-6-phosphate transport                                        |
| GO:0004344 | MF | glucose dehydrogenase activity                                       |

|            |    |                                                              |
|------------|----|--------------------------------------------------------------|
| GO:0004346 | MF | glucose-6-phosphatase activity                               |
| GO:0008877 | MF | glucose-1-phosphatase activity                               |
| GO:0010827 | BP | regulation of glucose transport                              |
| GO:2000970 | BP | regulation of detection of glucose                           |
| GO:0006009 | BP | glucose 1-phosphate phosphorylation                          |
| GO:0019255 | BP | glucose 1-phosphate metabolic process                        |
| GO:0051156 | BP | glucose 6-phosphate metabolic process                        |
| GO:0098708 | BP | glucose import across plasma membrane                        |
| GO:0004347 | MF | glucose-6-phosphate isomerase activity                       |
| GO:0046015 | BP | regulation of transcription by glucose                       |
| GO:0010906 | BP | regulation of glucose metabolic process                      |
| GO:0042149 | BP | cellular response to glucose starvation                      |
| GO:0047934 | MF | glucose 1-dehydrogenase (NAD <sup>+</sup> ) activity         |
| GO:0047061 | MF | glucose-fructose oxidoreductase activity                     |
| GO:0047935 | MF | glucose 1-dehydrogenase (NADP <sup>+</sup> ) activity        |
| GO:0047938 | MF | glucose-6-phosphate 1-epimerase activity                     |
| GO:0047936 | MF | glucose 1-dehydrogenase [NAD(P)] activity                    |
| GO:0004345 | MF | glucose-6-phosphate dehydrogenase activity                   |
| GO:0005355 | MF | glucose transmembrane transporter activity                   |
| GO:0047933 | MF | glucose-1,6-bisphosphate synthase activity                   |
| GO:0008876 | MF | quinoprotein glucose dehydrogenase activity                  |
| GO:1990576 | MF | G-protein coupled glucose receptor activity                  |
| GO:2000972 | BP | positive regulation of detection of glucose                  |
| GO:0032114 | BP | regulation of glucose-6-phosphatase activity                 |
| GO:0046430 | BP | non-phosphorylated glucose metabolic process                 |
| GO:0036448 | BP | cellular response to glucose-phosphate stress                |
| GO:0047937 | MF | glucose-1-phosphate phosphodismutase activity                |
| GO:0005362 | MF | low-affinity glucose:sodium symporter activity               |
| GO:0044381 | BP | glucose import in response to insulin stimulus               |
| GO:0047468 | MF | phosphoglucomutase (glucose-cofactor) activity               |
| GO:0061622 | BP | glycolytic process through glucose-1-phosphate               |
| GO:0010170 | CC | glucose-1-phosphate adenyltransferase complex                |
| GO:0008878 | MF | glucose-1-phosphate adenyltransferase activity               |
| GO:0047344 | MF | glucose-1-phosphate guanylyltransferase activity             |
| GO:1902659 | BP | regulation of glucose mediated signaling pathway             |
| GO:0008524 | MF | glucose 6-phosphate:phosphate antiporter activity            |
| GO:0047343 | MF | glucose-1-phosphate cytidyltransferase activity              |
| GO:0008879 | MF | glucose-1-phosphate thymidyltransferase activity             |
| GO:0061612 | BP | galactose to glucose-1-phosphate metabolic process           |
| GO:0010474 | MF | glucose-1-phosphate guanylyltransferase (GDP) activity       |
| GO:0015152 | MF | glucose-6-phosphate transmembrane transporter activity       |
| GO:1902924 | BP | poly(hydroxyalkanoate) biosynthetic process from glucose     |
| GO:0052749 | MF | glucose-6-phosphate dehydrogenase (coenzyme F420) activity   |
| GO:0089702 | MF | undecaprenyl-phosphate glucose phosphotransferase activity   |
| GO:0061513 | MF | glucose 6-phosphate:inorganic phosphate antiporter activity  |
| GO:0061547 | MF | glycogen synthase activity, transferring glucose-1-phosphate |



|            |    |                                                                                      |
|------------|----|--------------------------------------------------------------------------------------|
| GO:0061633 | BP | transport-coupled glycolytic process through glucose-6-phosphate                     |
| GO:0090525 | BP | regulation of glycolysis involved in cellular glucose homeostasis                    |
| GO:0047399 | MF | glucose-1-phospho-D-mannosylglycoprotein phosphodiesterase activity                  |
| GO:0036008 | BP | sucrose catabolic process to fructose-6-phosphate and glucose-6-phosphate            |
| GO:0036279 | BP | positive regulation of protein export from nucleus in response to glucose starvation |
| GO:0004396 | MF | hexokinase activity                                                                  |
| GO:0009011 | MF | starch synthase activity                                                             |
| GO:0050233 | MF | pyranose oxidase activity                                                            |
| GO:0004614 | MF | phosphoglucomutase activity                                                          |
| GO:0050190 | MF | phosphoglucokinase activity                                                          |
| GO:0050782 | MF | galactose uniporter activity                                                         |
| GO:1903299 | BP | regulation of hexokinase activity                                                    |
| GO:0004339 | MF | glucan 1,4-alpha-glucosidase activity                                                |
| GO:0004512 | MF | inositol-3-phosphate synthase activity                                               |
| GO:0047684 | MF | arylamine glucosyltransferase activity                                               |
| GO:0033840 | MF | NDP-glucose-starch glucosyltransferase activity                                      |
| GO:0005537 | MF | mannose binding                                                                      |
| GO:0015761 | BP | mannose transport                                                                    |
| GO:0015725 | BP | gluconate transport                                                                  |
| GO:0042946 | BP | glucoside transport                                                                  |
| GO:0015926 | MF | glucosidase activity                                                                 |
| GO:0017177 | CC | glucosidase II complex                                                               |
| GO:0018321 | BP | protein glucuronylation                                                              |
| GO:0005982 | BP | starch metabolic process                                                             |
| GO:0009251 | BP | glucan catabolic process                                                             |
| GO:0000017 | BP | alpha-glucoside transport                                                            |
| GO:0006013 | BP | mannose metabolic process                                                            |
| GO:0019253 | BP | reductive pentose-phosphate cycle                                                    |
| GO:0035429 | BP | gluconate transmembrane transport                                                    |
| GO:0008706 | MF | 6-phospho-beta-glucosidase activity                                                  |
| GO:0043456 | BP | regulation of pentose-phosphate shunt                                                |
| GO:0080042 | MF | ADP-glucose pyrophosphohydrolase activity                                            |
| GO:0015578 | MF | mannose transmembrane transporter activity                                           |
| GO:0010904 | BP | regulation of UDP-glucose catabolic process                                          |
| GO:0015128 | MF | gluconate transmembrane transporter activity                                         |
| GO:0042947 | MF | glucoside transmembrane transporter activity                                         |
| GO:0005460 | MF | UDP-glucose transmembrane transporter activity                                       |
| GO:0005356 | MF | hydrogen:glucose symporter activity                                                  |
| GO:0015573 | MF | beta-glucoside transmembrane transporter activity                                    |
| GO:0090564 | MF | protein-phosphocysteine-glucose phosphotransferase system transporter activity       |
| GO:0093001 | BP | glycolysis from storage polysaccharide                                               |
| GO:0006110 | BP | regulation of glycolytic process                                                     |
| GO:0061616 | BP | glycolytic process from fructose through fructose-6-phosphate                        |
| GO:0020015 | CC | glycosome                                                                            |
| GO:0019682 | BP | glyceraldehyde-3-phosphate metabolic process                                         |

GTPase and G-protein activity (65 terms, 323 genes)

| GOID       | Ontology | Term                                                                                                                      |
|------------|----------|---------------------------------------------------------------------------------------------------------------------------|
| GO:0005525 | MF       | GTP binding                                                                                                               |
| GO:0051020 | MF       | GTPase binding                                                                                                            |
| GO:0003924 | MF       | GTPase activity                                                                                                           |
| GO:0071521 | CC       | Cdc42 GTPase complex                                                                                                      |
| GO:0046039 | BP       | GTP metabolic process                                                                                                     |
| GO:1902773 | CC       | GTPase activator complex                                                                                                  |
| GO:1990131 | CC       | Gtr1-Gtr2 GTPase complex                                                                                                  |
| GO:0030695 | MF       | GTPase regulator activity                                                                                                 |
| GO:0036219 | MF       | GTP diphosphatase activity                                                                                                |
| GO:0044549 | MF       | GTP cyclohydrolase binding                                                                                                |
| GO:0003933 | MF       | GTP cyclohydrolase activity                                                                                               |
| GO:0010292 | MF       | GTP:GDP antiporter activity                                                                                               |
| GO:0008728 | MF       | GTP diphosphokinase activity                                                                                              |
| GO:0030742 | MF       | GTP-dependent protein binding                                                                                             |
| GO:0043087 | BP       | regulation of GTPase activity                                                                                             |
| GO:0003935 | MF       | GTP cyclohydrolase II activity                                                                                            |
| GO:0043740 | MF       | GTP cyclohydrolase IIa activity                                                                                           |
| GO:0070036 | MF       | GTP-dependent helicase activity                                                                                           |
| GO:0032794 | MF       | GTPase activating protein binding                                                                                         |
| GO:0034211 | MF       | GTP-dependent protein kinase activity                                                                                     |
| GO:0015987 | BP       | GTP synthesis coupled proton transport                                                                                    |
| GO:0050191 | MF       | phosphoglycerate kinase (GTP) activity                                                                                    |
| GO:0060308 | MF       | GTP cyclohydrolase I regulator activity                                                                                   |
| GO:0007264 | BP       | small GTPase mediated signal transduction                                                                                 |
| GO:0043095 | BP       | regulation of GTP cyclohydrolase I activity                                                                               |
| GO:0051735 | MF       | GTP-dependent polynucleotide kinase activity                                                                              |
| GO:0052754 | MF       | GTP:coenzyme F420 guanylyltransferase activity                                                                            |
| GO:0044682 | MF       | archaeal-specific GTP cyclohydrolase activity                                                                             |
| GO:0004613 | MF       | phosphoenolpyruvate carboxykinase (GTP) activity                                                                          |
| GO:0036428 | MF       | adenosylcobinamide kinase (GTP-specific) activity                                                                         |
| GO:0051056 | BP       | regulation of small GTPase mediated signal transduction                                                                   |
| GO:0051730 | MF       | GTP-dependent polyribonucleotide 5'-hydroxyl-kinase activity                                                              |
| GO:0090113 | BP       | regulation of ER to Golgi vesicle-mediated transport by GTP hydrolysis                                                    |
| GO:0044082 | BP       | modulation by symbiont of host small GTPase mediated signal transduction                                                  |
| GO:0060868 | BP       | regulation of vesicle-mediated transport involved in floral organ abscission by small GTPase mediated signal transduction |
| GO:0034448 | CC       | EGO complex                                                                                                               |
| GO:0004383 | MF       | guanylate cyclase activity                                                                                                |
| GO:0052621 | MF       | diguanylate cyclase activity                                                                                              |
| GO:0047992 | MF       | hydroxylysine kinase activity                                                                                             |
| GO:0047341 | MF       | fucose-1-phosphate guanylyltransferase activity                                                                           |
| GO:0047344 | MF       | glucose-1-phosphate guanylyltransferase activity                                                                          |
| GO:0008820 | MF       | cobinamide phosphate guanylyltransferase activity                                                                         |
| GO:0046899 | MF       | nucleoside triphosphate adenylate kinase activity                                                                         |

|            |    |                                                        |
|------------|----|--------------------------------------------------------|
| GO:0047351 | MF | guanosine-triphosphate guanylyltransferase activity    |
| GO:0033263 | CC | CORVET complex                                         |
| GO:0097178 | BP | ruffle assembly                                        |
| GO:0061568 | BP | GDP phosphorylation                                    |
| GO:0034745 | CC | APC-IQGAP1-Rac1 complex                                |
| GO:0004967 | MF | glucagon receptor activity                             |
| GO:0034996 | CC | RasGAP-Fyn-Lyn-Yes complex                             |
| GO:0031291 | BP | Ran protein signal transduction                        |
| GO:0044600 | MF | protein guanylyltransferase activity                   |
| GO:0004663 | MF | Rab geranylgeranyltransferase activity                 |
| GO:0047612 | MF | acid-CoA ligase (GDP-forming) activity                 |
| GO:0048195 | BP | Golgi membrane priming complex assembly                |
| GO:0032045 | CC | guanyl-nucleotide exchange factor complex              |
| GO:0005085 | MF | guanyl-nucleotide exchange factor activity             |
| GO:0045244 | CC | succinate-CoA ligase complex (GDP-forming)             |
| GO:0004776 | MF | succinate-CoA ligase (GDP-forming) activity            |
| GO:0043814 | MF | phospholactate guanylyltransferase activity            |
| GO:0052618 | MF | coenzyme F420-0:L-glutamate ligase activity            |
| GO:0008905 | MF | mannose-phosphate guanylyltransferase activity         |
| GO:0072518 | MF | Rho-dependent protein serine/threonine kinase activity |
| GO:0050254 | MF | rhodopsin kinase activity                              |
| GO:0031681 | MF | G-protein beta-subunit binding                         |
| GO:0001965 | MF | G-protein alpha-subunit binding                        |
| GO:0031682 | MF | G-protein gamma-subunit binding                        |
| GO:0005834 | CC | heterotrimeric G-protein complex                       |
| GO:0032795 | MF | heterotrimeric G-protein binding                       |
| GO:0070441 | CC | G-protein beta/gamma-Btk complex                       |
| GO:0001664 | MF | G-protein coupled receptor binding                     |
| GO:0070422 | CC | G-protein beta/gamma-Raf-1 complex                     |
| GO:0097648 | CC | G-protein coupled receptor complex                     |
| GO:0004930 | MF | G-protein coupled receptor activity                    |
| GO:0031680 | CC | G-protein beta/gamma-subunit complex                   |
| GO:0071152 | CC | G-protein alpha(q)-synembrin complex                   |
| GO:0071153 | CC | G-protein alpha(o)-synembrin complex                   |
| GO:0071154 | CC | G-protein alpha(i)1-synembrin complex                  |
| GO:0071155 | CC | G-protein alpha(13)-synembrin complex                  |
| GO:0031684 | BP | heterotrimeric G-protein complex cycle                 |
| GO:0031795 | MF | G-protein coupled GABA receptor binding                |
| GO:1902712 | CC | G-protein coupled GABA receptor complex                |
| GO:1902605 | BP | heterotrimeric G-protein complex assembly              |
| GO:0004703 | MF | G-protein coupled receptor kinase activity             |
| GO:1990576 | MF | G-protein coupled glucose receptor activity            |
| GO:0007186 | BP | G-protein coupled receptor signaling pathway           |
| GO:0031683 | MF | G-protein beta/gamma-subunit complex binding           |
| GO:0031806 | MF | G-protein coupled histamine receptor binding           |
| GO:0038054 | MF | G-protein coupled estrogen receptor activity           |

|            |    |                                                                                                          |
|------------|----|----------------------------------------------------------------------------------------------------------|
| GO:0001647 | MF | G-protein coupled cytokinin receptor activity                                                            |
| GO:0038022 | MF | G-protein coupled olfactory receptor activity                                                            |
| GO:0038182 | MF | G-protein coupled bile acid receptor activity                                                            |
| GO:0031789 | MF | G-protein coupled acetylcholine receptor binding                                                         |
| GO:0038035 | BP | G-protein coupled receptor signaling in absence of ligand                                                |
| GO:0001639 | MF | PLC activating G-protein coupled glutamate receptor activity                                             |
| GO:0015467 | MF | G-protein activated inward rectifier potassium channel activity                                          |
| GO:0008277 | BP | regulation of G-protein coupled receptor protein signaling pathway                                       |
| GO:0044503 | BP | modulation of G-protein coupled receptor activity in other organism                                      |
| GO:0038040 | BP | cross-receptor activation within G-protein coupled receptor heterodimer                                  |
| GO:0038041 | BP | cross-receptor inhibition within G-protein coupled receptor heterodimer                                  |
| GO:0044505 | BP | positive regulation of G-protein coupled receptor activity in other organism                             |
| GO:0001789 | BP | G-protein coupled receptor signaling pathway, coupled to S1P second messenger                            |
| GO:1900128 | BP | regulation of G-protein activated inward rectifier potassium channel activity                            |
| GO:0075087 | BP | modulation by host of symbiont G-protein coupled receptor protein signal transduction                    |
| GO:0075093 | BP | modulation by host of symbiont signal transduction mediated by G-protein beta subunit                    |
| GO:0075118 | BP | modulation by symbiont of host G-protein coupled receptor protein signal transduction                    |
| GO:0075124 | BP | modulation by symbiont of host signal transduction mediated by G-protein beta subunit                    |
| GO:0075162 | BP | regulation of G-protein beta subunit-mediated signal transduction in response to host                    |
| GO:0075090 | BP | modulation by host of symbiont signal transduction mediated by G-protein alpha subunit                   |
| GO:0075096 | BP | modulation by host of symbiont signal transduction mediated by G-protein gamma subunit                   |
| GO:0075121 | BP | modulation by symbiont of host signal transduction mediated by G-protein alpha subunit                   |
| GO:0075127 | BP | modulation by symbiont of host signal transduction mediated by G-protein gamma subunit                   |
| GO:0075156 | BP | regulation of G-protein coupled receptor protein signaling pathway in response to host                   |
| GO:0075159 | BP | regulation of G-protein alpha subunit-mediated signal transduction in response to host                   |
| GO:0075165 | BP | regulation of G-protein gamma subunit-mediated signal transduction in response to host                   |
| GO:0010619 | BP | adenylate cyclase-activating glucose-activated G-protein coupled receptor signaling pathway              |
| GO:0044513 | BP | envenomation resulting in modulation of G-protein coupled receptor activity in other organism            |
| GO:0086093 | BP | G-protein coupled acetylcholine receptor signaling pathway involved in involved in heart process         |
| GO:1903554 | BP | G-protein coupled receptor signaling pathway involved in defense response to Gram-negative bacterium     |
| GO:0044514 | BP | envenomation resulting in positive regulation of G-protein coupled receptor activity in other organism   |
| GO:0086033 | BP | G-protein coupled acetylcholine receptor signaling pathway involved in negative regulation of heart rate |

*Insulin processing and signaling (30 terms, 185 genes)*

| GOID       | Ontology | Term                           |
|------------|----------|--------------------------------|
| GO:0043559 | MF       | insulin binding                |
| GO:0030073 | BP       | insulin secretion              |
| GO:0032868 | BP       | response to insulin            |
| GO:0005158 | MF       | insulin receptor binding       |
| GO:0005899 | CC       | insulin receptor complex       |
| GO:1901142 | BP       | insulin metabolic process      |
| GO:0038020 | BP       | insulin receptor recycling     |
| GO:0032593 | CC       | insulin-responsive compartment |

|            |    |                                                                     |
|------------|----|---------------------------------------------------------------------|
| GO:0050796 | BP | regulation of insulin secretion                                     |
| GO:0038016 | BP | insulin receptor internalization                                    |
| GO:0005520 | MF | insulin-like growth factor binding                                  |
| GO:0043560 | MF | insulin receptor substrate binding                                  |
| GO:0005009 | MF | insulin-activated receptor activity                                 |
| GO:0030232 | CC | insulin control element activator complex                           |
| GO:0042568 | CC | insulin-like growth factor binary complex                           |
| GO:0042567 | CC | insulin-like growth factor ternary complex                          |
| GO:0005159 | MF | insulin-like growth factor receptor binding                         |
| GO:0044381 | BP | glucose import in response to insulin stimulus                      |
| GO:1990418 | BP | response to insulin-like growth factor stimulus                     |
| GO:0016942 | CC | insulin-like growth factor binding protein complex                  |
| GO:1900076 | BP | regulation of cellular response to insulin stimulus                 |
| GO:0048009 | BP | insulin-like growth factor receptor signaling pathway               |
| GO:0005010 | MF | insulin-like growth factor-activated receptor activity              |
| GO:0005360 | MF | insulin-responsive hydrogen:glucose symporter activity              |
| GO:1990314 | BP | cellular response to insulin-like growth factor stimulus            |
| GO:0043567 | BP | regulation of insulin-like growth factor receptor signaling pathway |

*Ion transport and homeostasis (84 terms, 290 genes)*

| GOID       | Ontology | Term                                   |
|------------|----------|----------------------------------------|
| GO:0006811 | BP       | ion transport                          |
| GO:0050801 | BP       | ion homeostasis                        |
| GO:0043269 | BP       | regulation of ion transport            |
| GO:2000021 | BP       | regulation of ion homeostasis          |
| GO:0015075 | MF       | ion transmembrane transporter activity |

*Membrane potential and Ion channels (49 terms, 144 genes)*

| GOID       | Ontology | Term                                                                                    |
|------------|----------|-----------------------------------------------------------------------------------------|
| GO:0034702 | CC       | ion channel complex                                                                     |
| GO:0044325 | MF       | ion channel binding                                                                     |
| GO:0005216 | MF       | ion channel activity                                                                    |
| GO:0022836 | MF       | gated channel activity                                                                  |
| GO:0010359 | BP       | regulation of anion channel activity                                                    |
| GO:2001257 | BP       | regulation of cation channel activity                                                   |
| GO:0016247 | MF       | channel regulator activity                                                              |
| GO:0042391 | BP       | regulation of membrane potential                                                        |
| GO:0022810 | MF       | membrane potential driven uniporter activity                                            |
| GO:0016057 | BP       | regulation of membrane potential in photoreceptor cell                                  |
| GO:0016058 | BP       | maintenance of membrane potential in photoreceptor cell by rhodopsin mediated signaling |
| GO:0003254 | BP       | regulation of membrane depolarization                                                   |
| GO:0019227 | BP       | neuronal action potential propagation                                                   |
| GO:0022814 | MF       | facilitated diffusion                                                                   |
| GO:0001518 | CC       | voltage-gated sodium channel complex                                                    |

|            |    |                                                                                                           |
|------------|----|-----------------------------------------------------------------------------------------------------------|
| GO:0005891 | CC | voltage-gated calcium channel complex                                                                     |
| GO:0008076 | CC | voltage-gated potassium channel complex                                                                   |
| GO:0022865 | MF | transmembrane electron transfer carrier                                                                   |
| GO:0046609 | MF | voltage-gated sulfate antiporter activity                                                                 |
| GO:0008087 | CC | light-activated voltage-gated calcium channel complex                                                     |
| GO:0060072 | MF | large conductance calcium-activated potassium channel activity                                            |
| GO:0015291 | MF | secondary active transmembrane transporter activity                                                       |
| GO:0086016 | BP | AV node cell action potential                                                                             |
| GO:0098900 | BP | regulation of action potential                                                                            |
| GO:0022832 | MF | voltage-gated channel activity                                                                            |
| GO:0070073 | BP | clustering of voltage-gated calcium channels                                                              |
| GO:1990454 | CC | L-type voltage-gated calcium channel complex                                                              |
| GO:0070978 | BP | voltage-gated calcium channel complex assembly                                                            |
| GO:0015274 | MF | organellar voltage-gated chloride channel activity                                                        |
| GO:1990028 | MF | intermediate voltage-gated calcium channel activity                                                       |
| GO:1901385 | BP | regulation of voltage-gated calcium channel activity                                                      |
| GO:1902941 | BP | regulation of voltage-gated chloride channel activity                                                     |
| GO:0008086 | MF | light-activated voltage-gated calcium channel activity                                                    |
| GO:1903817 | BP | negative regulation of voltage-gated potassium channel activity                                           |
| GO:1903818 | BP | positive regulation of voltage-gated potassium channel activity                                           |
| GO:0010462 | BP | regulation of light-activated voltage-gated calcium channel activity                                      |
| GO:0044488 | BP | modulation of voltage-gated sodium channel activity in other organism                                     |
| GO:0044360 | BP | modulation of voltage-gated potassium channel activity in other organism                                  |
| GO:0035918 | BP | negative regulation of voltage-gated calcium channel activity in other organism                           |
| GO:0044492 | BP | envenomation resulting in modulation of voltage-gated sodium channel activity in other organism           |
| GO:0044559 | BP | envenomation resulting in modulation of voltage-gated potassium channel activity in other organism        |
| GO:0044474 | BP | envenomation resulting in negative regulation of voltage-gated calcium channel activity in other organism |
| GO:1990227 | BP | paranodal junction maintenance                                                                            |
| GO:0045161 | BP | neuronal ion channel clustering                                                                           |
| GO:0044736 | MF | acid-sensing ion channel activity                                                                         |

*Oxidation-reduction and Oxygen-mediated activity (40 terms, 227 genes)*

| GOID       | Ontology | Term                                                    |
|------------|----------|---------------------------------------------------------|
| GO:0072593 | BP       | reactive oxygen species metabolic process               |
| GO:2000377 | BP       | regulation of reactive oxygen species metabolic process |
| GO:0015671 | BP       | oxygen transport                                        |
| GO:0072592 | BP       | oxygen metabolic process                                |
| GO:0019825 | MF       | oxygen binding                                          |
| GO:0032364 | BP       | oxygen homeostasis                                      |
| GO:0010242 | MF       | oxygen evolving activity                                |
| GO:0070482 | BP       | response to oxygen levels                               |
| GO:0000302 | BP       | response to reactive oxygen species                     |
| GO:0005344 | MF       | oxygen transporter activity                             |
| GO:2000374 | BP       | regulation of oxygen metabolic process                  |

|            |    |                                                                           |
|------------|----|---------------------------------------------------------------------------|
| GO:1901031 | BP | regulation of response to reactive oxygen species                         |
| GO:0055114 | BP | oxidation-reduction process                                               |
| GO:1990204 | CC | oxidoreductase complex                                                    |
| GO:0016491 | MF | oxidoreductase activity                                                   |
| GO:0051341 | BP | regulation of oxidoreductase activity                                     |
| GO:1990042 | MF | glycerol dehydrogenase [NAD(P)+] activity                                 |
| GO:0045272 | CC | plasma membrane respiratory chain complex I                               |
| GO:0070469 | CC | respiratory chain                                                         |
| GO:0008535 | BP | respiratory chain complex IV assembly                                     |
| GO:0034552 | BP | respiratory chain complex II assembly                                     |
| GO:0017062 | BP | respiratory chain complex III assembly                                    |
| GO:0033108 | BP | mitochondrial respiratory chain complex assembly                          |
| GO:0005753 | CC | mitochondrial proton-transporting ATP synthase complex                    |
| GO:1903264 | MF | nitrate reductase activity involved in anaerobic electron transport chain |
| GO:0009055 | MF | electron carrier activity                                                 |
| GO:0016860 | MF | intramolecular oxidoreductase activity                                    |
| GO:0006119 | BP | oxidative phosphorylation                                                 |

**Oxoacid metabolic process and Fatty acid activity (86 terms, 252 genes)**

| GOLD       | Ontology | Term                             |
|------------|----------|----------------------------------|
| GO:0043436 | BP       | oxoacid metabolic process        |
| GO:0016833 | MF       | oxo-acid-lyase activity          |
| GO:0005504 | MF       | fatty acid binding               |
| GO:0015908 | BP       | fatty acid transport             |
| GO:0000062 | MF       | fatty-acyl-CoA binding           |
| GO:0055089 | BP       | fatty acid homeostasis           |
| GO:0070542 | BP       | response to fatty acid           |
| GO:0015916 | BP       | fatty-acyl-CoA transport         |
| GO:0015645 | MF       | fatty acid ligase activity       |
| GO:0015915 | BP       | fatty-acyl group transport       |
| GO:0005835 | CC       | fatty acid synthase complex      |
| GO:0009923 | CC       | fatty acid elongase complex      |
| GO:0004312 | MF       | fatty acid synthase activity     |
| GO:0006631 | BP       | fatty acid metabolic process     |
| GO:0015913 | BP       | short-chain fatty acid import    |
| GO:1901567 | MF       | fatty acid derivative binding    |
| GO:0047888 | MF       | fatty acid peroxidase activity   |
| GO:0005836 | CC       | fatty-acyl-CoA synthase complex  |
| GO:0015245 | MF       | fatty acid transporter activity  |
| GO:1901571 | BP       | fatty acid derivative transport  |
| GO:1903173 | BP       | fatty alcohol metabolic process  |
| GO:1903174 | BP       | fatty alcohol catabolic process  |
| GO:0004321 | MF       | fatty-acyl-CoA synthase activity |
| GO:0015912 | BP       | short-chain fatty acid transport |
| GO:0035337 | BP       | fatty-acyl-CoA metabolic process |

|            |    |                                                                                  |
|------------|----|----------------------------------------------------------------------------------|
| GO:0003997 | MF | acyl-CoA oxidase activity                                                        |
| GO:1903175 | BP | fatty alcohol biosynthetic process                                               |
| GO:2000191 | BP | regulation of fatty acid transport                                               |
| GO:0015607 | MF | fatty-acyl-CoA transporter activity                                              |
| GO:0017064 | MF | fatty acid amide hydrolase activity                                              |
| GO:0015246 | MF | fatty-acyl group transporter activity                                            |
| GO:0003995 | MF | acyl-CoA dehydrogenase activity                                                  |
| GO:0080132 | MF | fatty acid alpha-hydroxylase activity                                            |
| GO:0042389 | MF | omega-3 fatty acid desaturase activity                                           |
| GO:0045485 | MF | omega-6 fatty acid desaturase activity                                           |
| GO:1990486 | BP | anaerobic fatty acid catabolic process                                           |
| GO:0030733 | MF | fatty acid O-methyltransferase activity                                          |
| GO:0034016 | MF | polyenoic fatty acid isomerase activity                                          |
| GO:0050062 | MF | long-chain-fatty-acyl-CoA reductase activity                                     |
| GO:1901568 | BP | fatty acid derivative metabolic process                                          |
| GO:0030339 | MF | fatty-acyl-ethyl-ester synthase activity                                         |
| GO:0003996 | MF | acyl-CoA ligase activity                                                         |
| GO:0052722 | MF | fatty acid in-chain hydroxylase activity                                         |
| GO:1902898 | BP | fatty acid methyl ester metabolic process                                        |
| GO:0019217 | BP | regulation of fatty acid metabolic process                                       |
| GO:0031955 | MF | short-chain fatty acid-CoA ligase activity                                       |
| GO:0015635 | MF | short-chain fatty acid transporter activity                                      |
| GO:0031956 | MF | medium-chain fatty acid-CoA ligase activity                                      |
| GO:1902899 | BP | fatty acid methyl ester biosynthetic process                                     |
| GO:0036125 | CC | fatty acid beta-oxidation multienzyme complex                                    |
| GO:0035338 | BP | long-chain fatty-acyl-CoA biosynthetic process                                   |
| GO:0044535 | MF | very-long-chain fatty acyl-CoA oxidase activity                                  |
| GO:1902321 | BP | methyl-branched fatty acid biosynthetic process                                  |
| GO:0036113 | BP | very long-chain fatty-acyl-CoA catabolic process                                 |
| GO:0015483 | MF | long-chain fatty acid transporting porin activity                                |
| GO:0008421 | MF | long-chain fatty-acyl-glutamate deacylase activity                               |
| GO:0015636 | MF | short-chain fatty acid uptake transporter activity                               |
| GO:0033541 | BP | fatty acid beta-oxidation, unsaturated, odd number                               |
| GO:0033542 | BP | fatty acid beta-oxidation, unsaturated, even number                              |
| GO:0080019 | MF | fatty-acyl-CoA reductase (alcohol-forming) activity                              |
| GO:0047474 | MF | long-chain fatty acid luciferin component ligase activity                        |
| GO:1902925 | BP | poly(hydroxyalkanoate) biosynthetic process from fatty acid                      |
| GO:1902322 | BP | regulation of methyl-branched fatty acid biosynthetic process                    |
| GO:0033544 | BP | fatty acid beta-oxidation, unsaturated, even number, epimerase pathway           |
| GO:0033543 | BP | fatty acid beta-oxidation, unsaturated, even number, reductase/isomerase pathway |
| GO:0003987 | MF | acetate-CoA ligase activity                                                      |
| GO:0009317 | CC | acetyl-CoA carboxylase complex                                                   |
| GO:0008521 | MF | acetyl-CoA transporter activity                                                  |
| GO:0035348 | BP | acetyl-CoA transmembrane transport                                               |
| GO:0008775 | MF | acetate CoA-transferase activity                                                 |



Protein tyrosine and serine/threonine kinase activity (104 terms, 297 genes)

| GOID       | Ontology | Term                                                                                                         |
|------------|----------|--------------------------------------------------------------------------------------------------------------|
| GO:0004713 | MF       | protein tyrosine kinase activity                                                                             |
| GO:0030971 | MF       | receptor tyrosine kinase binding                                                                             |
| GO:0030292 | MF       | protein tyrosine kinase inhibitor activity                                                                   |
| GO:0030296 | MF       | protein tyrosine kinase activator activity                                                                   |
| GO:0061097 | BP       | regulation of protein tyrosine kinase activity                                                               |
| GO:0007169 | BP       | transmembrane receptor protein tyrosine kinase signaling pathway                                             |
| GO:0030293 | MF       | transmembrane receptor protein tyrosine kinase inhibitor activity                                            |
| GO:0017017 | MF       | MAP kinase tyrosine/serine/threonine phosphatase activity                                                    |
| GO:1902554 | CC       | serine/threonine protein kinase complex                                                                      |
| GO:0004674 | MF       | protein serine/threonine kinase activity                                                                     |
| GO:0033612 | MF       | receptor serine/threonine kinase binding                                                                     |
| GO:0033867 | MF       | Fas-activated serine/threonine kinase activity                                                               |
| GO:0004712 | MF       | protein serine/threonine/tyrosine kinase activity                                                            |
| GO:0030291 | MF       | protein serine/threonine kinase inhibitor activity                                                           |
| GO:0043539 | MF       | protein serine/threonine kinase activator activity                                                           |
| GO:0071900 | BP       | regulation of protein serine/threonine kinase activity                                                       |
| GO:0072518 | MF       | Rho-dependent protein serine/threonine kinase activity                                                       |
| GO:0016538 | MF       | cyclin-dependent protein serine/threonine kinase regulator activity                                          |
| GO:0061575 | MF       | cyclin-dependent protein serine/threonine kinase activator activity                                          |
| GO:0007178 | BP       | transmembrane receptor protein serine/threonine kinase signaling pathway                                     |
| GO:0090092 | BP       | regulation of transmembrane receptor protein serine/threonine kinase signaling pathway                       |
| GO:0060869 | BP       | transmembrane receptor protein serine/threonine kinase signaling pathway involved in floral organ abscission |
| GO:0005963 | CC       | magnesium-dependent protein serine/threonine phosphatase complex                                             |
| GO:0008287 | CC       | protein serine/threonine phosphatase complex                                                                 |
| GO:0004722 | MF       | protein serine/threonine phosphatase activity                                                                |
| GO:0004865 | MF       | protein serine/threonine phosphatase inhibitor activity                                                      |
| GO:0080163 | BP       | regulation of protein serine/threonine phosphatase activity                                                  |
| GO:0009400 | MF       | receptor signaling protein serine/threonine phosphatase activity                                             |
| GO:0008597 | MF       | calcium-dependent protein serine/threonine phosphatase regulator activity                                    |
| GO:0039517 | BP       | modulation by virus of host protein serine/threonine phosphatase activity                                    |

Vesicle-mediated transport and secretion by cell (65 terms, 291 genes)

| GOID       | Ontology | Term                                         |
|------------|----------|----------------------------------------------|
| GO:0032940 | BP       | secretion by cell                            |
| GO:1903530 | BP       | regulation of secretion by cell              |
| GO:0060471 | BP       | cortical granule exocytosis                  |
| GO:1990504 | BP       | dense core granule exocytosis                |
| GO:0090522 | BP       | vesicle tethering involved in exocytosis     |
| GO:0016182 | BP       | synaptic vesicle budding from endosome       |
| GO:0043317 | BP       | regulation of cytotoxic T cell degranulation |
| GO:0055039 | CC       | trichocyst                                   |
| GO:0034044 | CC       | exomer complex                               |

|            |    |                                                         |
|------------|----|---------------------------------------------------------|
| GO:0032195 | CC | post-lysosomal vacuole                                  |
| GO:0097654 | CC | platelet SNARE complex                                  |
| GO:1990502 | BP | dense core granule maturation                           |
| GO:0055108 | BP | Golgi to transport vesicle transport                    |
| GO:0044656 | BP | regulation of post-lysosomal vacuole size               |
| GO:0070319 | CC | Golgi to plasma membrane transport vesicle              |
| GO:0070381 | CC | endosome to plasma membrane transport vesicle           |
| GO:0035895 | BP | modulation of mast cell degranulation in other organism |
| GO:0000149 | MF | SNARE binding                                           |
| GO:0031201 | CC | SNARE complex                                           |
| GO:0035495 | BP | regulation of SNARE complex disassembly                 |
| GO:0005484 | MF | SNAP receptor activity                                  |
| GO:0005802 | CC | trans-Golgi network                                     |
| GO:0030118 | CC | clathrin coat                                           |
| GO:1901950 | BP | dense core granule transport                            |
| GO:0061110 | BP | dense core granule biogenesis                           |
| GO:0033363 | BP | secretory granule organization                          |
| GO:0032253 | BP | dense core granule localization                         |
| GO:0061109 | BP | dense core granule organization                         |
| GO:0055107 | BP | Golgi to secretory granule transport                    |
| GO:1990048 | BP | anterograde dense core granule transport                |
| GO:0032255 | BP | maintenance of secretory granule location               |
| GO:0033366 | BP | protein localization to secretory granule               |
| GO:0032257 | BP | maintenance of dense core granule location              |
| GO:2000705 | BP | regulation of dense core granule biogenesis             |
| GO:0032254 | BP | establishment of secretory granule localization         |
| GO:0032256 | BP | establishment of dense core granule localization        |
| GO:0033263 | CC | CORVET complex                                          |
| GO:0070067 | CC | syntaxin-6-syntaxin-16-Vti1a complex                    |
| GO:0005483 | MF | soluble NSF attachment protein activity                 |
| GO:0097547 | CC | synaptic vesicle protein transport vesicle              |
| GO:1990563 | CC | extracellular vesicular exosome complex                 |
| GO:0071971 | BP | extracellular vesicular exosome assembly                |
| GO:1903551 | BP | regulation of extracellular vesicular exosome assembly  |
| GO:1903541 | BP | regulation of exosomal secretion                        |
| GO:0016192 | BP | vesicle-mediated transport                              |
| GO:0060627 | BP | regulation of vesicle-mediated transport                |
