# Supplementary material for: Temporal Transcriptome Analysis Reveals Dynamic Gene Expression Patterns Driving β-Cell Maturation
Source: Frontiers journal article supplement (doi:10.3389/fcell.2021.648791), 2021-05-04
Supplement: Table_1.XLS [file Table_1.XLS]

## Sheet: ESM_Table_1
geneSymbol	Ngn3_Null	Ngn3_Het	P1-beta	P4-beta	P12-beta	P60-beta	P_value	Main_Pattern	Sign_Main_Pattern	Time_break	GSIS_process	Functional_Category
Atp2a3	8.83693	13.3717	15.2963	15.0873	14.9222	15.2713	0	D	Positive	P1	CMP;ITH;MPIC	Bi;BRB;Di;EPRSS;IS;LT;Mem;Met
Chga	6.17338	13.9718	17.4159	17.7011	18.0063	17.8843	0	D	Positive	P1	VTSC	Bi;CCDB;Mem;Or
Chgb	6.76665	15.2452	16.5503	16.1294	16.4177	17.4241	0	D	Positive	P1	VTSC	Bi;CCDB;Or
Disp2	5.28828	13.0247	14.7726	14.8281	14.7927	15.1826	0	D	Positive	P1	Unclassified	Mem
G6pc2	3.47682	10.1548	14.4137	15.177	14.8102	16.847	0	D;U	Positive	P1;P60	GGPMTC;IPS	BRB;BCA;EPRSS;LT;Mem;Met;Or;SP
H19	16.772	15.5954	9.98655	9.13281	8.84984	0.528321	0	C1	Negative	P60
Iapp	5.48569	13.7953	17.4053	17.498	17.5775	18.0064	0	D	Positive	P1	GGA;IPS	Bi;BRB;CCDB;DPR;Di;EPRSS;SP
Ins1	7.26263	13.9853	19.919	20.1424	20.214	20.9208	0	D	Positive	P1	GGPMTC;GGA;IPS;OOMA;VTSC	Bi;BRB;CPGD;CCDB;DPR;Di;EPRSS;LT;Met;Or
Ins2	8.49137	15.0432	20.1509	20.556	20.5712	21.3573	0	D	Positive	P1	GGPMTC;GGA;IPS;OOMA;PTSKA;VTSC	Bi;BRB;BCA;CPGD;CCDB;DPR;Di;EPRSS;GIP;LT;Met;Or
Papss2	7.74488	12.1919	14.7489	14.5887	14.5361	14.2728	0	D	Positive	P1	Unclassified	Bi;BRB;BCA;DPR;Met
Pcsk1	6.56838	11.9817	14.776	14.4155	14.3551	14.9201	0	D	Positive	P1	VTSC	BCA;CCDB;EPRSS;Met;Or
Pcsk2	4.46	13.91	16.11	15.77	15.91	16.13	0	A;D;U	Positive	E15.5_Ngn3_Het;P1;P60	IPS;VTSC	Bi;BCA;CCDB;DPR;EPRSS;Met;Or;SP
Scg2	4.7011	12.1662	16.0368	16.123	15.9067	16.5652	0	D	Positive	P1	VTSC	ACAM;Bi;CPGD;CCDB;DPR;EPRSS;Met;Or
Scg3	4.13131	12.6722	15.3669	14.7348	14.3952	14.8947	0	D	Positive	P1	VTSC	BRB;CCDB;GIP;IS;Mem
Serpina6	16.6303	15.256	2.48098	5.0664	2.04309	0	0	C1;T	Negative	P12;P60	Unclassified	Bi;BCA;Met
Slc30a8	1.70976	10.5087	14.9757	14.4279	14.3022	13.8815	0	D	Positive	P1	GGPMTC;IPS;ITH;VTSC	Bi;BRB;EPRSS;IS;LT;Mem;Or
Spock2	6.5652	12.2646	14.2537	14.2858	14.0983	14.605	0	D	Positive	P1	CMP	ACAM;Bi;CCDB;EPRSS;Met
Syt13	5.95	13.78	15.11	15.09	14.89	14.79	0	A;D	Positive	E15.5_Ngn3_Het;P1	VTSC	Bi;LT;Mem;Or
Baiap3	4.9	13.5	13.3	13.35	13.12	11.86	1.11022e-16	A;D	Positive	E15.5_Ngn3_Het;P1	GGA	Bi;EPRSS
Cpe	9.66	14.12	16.34	16.05	15.59	16.03	1.11022e-16	A;D	Positive	E15.5_Ngn3_Het;P1	IPS;VTSC	ACAM;Bi;BCA;DPR;Di;LT;Mem;Met;Or
Gnao1	5.08	13.06	13.71	13.48	13.26	12.86	1.11022e-16	A;D	Positive	E15.5_Ngn3_Het;P1	GGA;ITH	ACAM;Bi;BRB;BCA;DPR;EPRSS;LT;SP
Pax6	3.44	13.01	13.75	13.61	13.3	13.33	1.11022e-16	A;D	Positive	E15.5_Ngn3_Het;P1	GGPMTC;IPS;OMPFAA;VTSC	ACAM;Bi;BRB;CPGD;CCDB;DPR;Di;EPRSS;GIP;LT;Or
Pyy	4.62027	13.6582	12.6987	13.7938	13.7642	9.47893	1.11022e-16	Singleton	Positive	P12
Scg5	4.67872	10.8801	13.6675	13.4582	13.2586	14.6077	1.11022e-16	D	Positive	P1	GGA;VTSC	Bi;BCA;CCDB;EPRSS;LT;Met;Or
Sez6l2	5.98567	11.3633	13.5611	13.6396	13.4422	13.8259	1.11022e-16	D	Positive	P1	Unclassified	BRB;CCDB;DPR;EPRSS;Mem;SP
Sphkap	3.51	12.47	13.82	13.77	13.67	13.95	1.11022e-16	A;D	Positive	E15.5_Ngn3_Het;P1	Unclassified	Bi;CCDB;Or;SP
Sst	2.44	12	13.82	14.02	13.76	12.85	1.11022e-16	A;D	Positive	E15.5_Ngn3_Het;P1	GGA	ACAM;Bi;CCDB;EPRSS;SP
Sytl4	8.00518	11.8055	14.8703	14.1142	13.7977	13.6225	1.11022e-16	D	Positive	P1	GGA;IPS;VTSC	Bi;CCDB;GIP;LT;Mem;Or
Aldh1b1	14.1138	13.0696	7.04879	7.03306	7.11988	6.66462	2.22045e-16	C1;J	Negative	P1;P60	GGPMTC;OOMA;OMPFAA	BCA;CCDB;GIP;Met
Map1b	8.1	13.24	13.94	13.94	13.62	13.02	2.22045e-16	A;D	Positive	E15.5_Ngn3_Het;P1	Unclassified	ACAM;Bi;BCA;CCDB;DPR;LT;Mem;Met;SP
Slc7a14	3.84	12.19	13.79	13.5	13.2	13.39	2.22045e-16	A;D	Positive	E15.5_Ngn3_Het;P1	ITH	BCA;LT;Mem;Met
Insrr	6.79114	11.824	13.3451	13.5434	13.7051	12.3718	3.33067e-16	D;O	Positive	P1;P12	PTSKA	Bi;BCA;CCDB;EPRSS;Mem;Met
Gcg	3.8	14.47	13.58	12.17	12.37	10.64	4.44089e-16	A	Positive	E15.5_Ngn3_Het	VTSC	ACAM;BRB;EPRSS;LT;Met
Prnp	8.25822	12.1981	13.72	13.5492	13.7155	15.0319	5.55111e-16	D;U	Positive	P1;P60	ITH	ACAM;Bi;BRB;BCA;CCDB;EPRSS;GIP;IS;LT;Mem;Met;Or;SP
Syt7	7.61	12.75	13.62	13.48	13.04	12.48	5.55111e-16	A;D	Positive	E15.5_Ngn3_Het;P1	CMP;IPS;VTSC	ACAM;Bi;EPRSS;LT;Mem;Or
Ptprn	4.11328	10.7001	12.8115	13.2047	13.1816	14.5814	7.77156e-16	D;U	Positive	P1;P60	GGPMTC;GGA;IPS	Bi;BCA;Di;EPRSS;Mem;Met
Scgn	2.10731	11.8694	13.2779	13.0899	12.9955	12.4059	9.99201e-16	D	Positive	P1	CMP;VTSC	Bi;CCDB;Mem
Vwa5b2	5.4	13.5	13.22	12.8	12.13	11.01	9.99201e-16	A	Positive	E15.5_Ngn3_Het
Entpd3	7.12554	11.7565	13.6564	13.311	12.7893	12.7922	1.11022e-15	D	Positive	P1	Unclassified	BCA;Mem;Met
Il1r1	7.73015	10.0876	13.9625	14.0273	13.8942	12.8693	1.11022e-15	D;O	Positive	P1;P12	Unclassified	Bi;CCDB;Di;EPRSS;IS;Mem
Ldha	13.9774	12.7926	6.72888	8.13801	8.92255	3.09513	1.55431e-15	C1	Negative	P60	GGPMTC;OOMA;OMPFAA	Bi;BCA;CCDB;DPR;EPRSS;GIP;Mem;Met;Or
Rimbp2	3.04	12.13	12.98	12.97	12.73	12.32	1.66534e-15	A;D	Positive	E15.5_Ngn3_Het;P1	Unclassified	ACAM;Bi;BCA;Mem;Met
Ap1s2	7.57	12.13	13.54	13.01	13.04	12.55	1.88738e-15	A;D	Positive	E15.5_Ngn3_Het;P1	VTSC	CCDB;LT;Mem;Or
Neurod1	1.67	11.96	12.86	12.8	12.64	12.17	1.9984e-15	A;D	Positive	E15.5_Ngn3_Het;P1	GGPMTC;IPS	ACAM;Bi;CPGD;CCDB;DPR;Di;EPRSS;GIP;LT;Or;SP
Pcsk1n	2.7	10.44	11.89	13.21	13.73	13.58	1.9984e-15	A;D;U	Positive	E15.5_Ngn3_Het;P1;P60	GGA;VTSC	BCA;CCDB;EPRSS;Met;Or
Unc80	6.73955	11.0217	12.9095	13.2215	13.4162	12.6601	1.9984e-15	D	Positive	P1	MPIC	LT
Gpc3	13.7781	12.5627	7.6621	8.43977	8.02678	4.70047	2.55351e-15	C1	Negative	P60	GGPMTC;OMPFAA;PTSKA	Bi;BCA;CPGD;CCDB;DPR;Di;EPRSS;LT;Mem;Met;Or;SP
Gjd2	2.46	10.66	12.87	13.16	12.96	12.53	2.66453e-15	A;D	Positive	E15.5_Ngn3_Het;P1	MPIC	ACAM;Bi;CCDB;Mem;SP
Muc4	3.03443	10.9856	13.413	12.859	12.7978	12.0826	2.66453e-15	D	Positive	P1	Unclassified	ACAM;Bi;DPR;Met
Mlxipl	8.55668	12.8225	13.6656	13.9415	13.7678	11.5139	2.77556e-15	D;O	Positive	P1;P12	Unclassified	Bi;BRB;BCA;CCDB;GIP;Or
Ptprn2	9.92	14.13	15.16	14.98	14.77	14.27	2.77556e-15	A;D	Positive	E15.5_Ngn3_Het;P1	GGA;VTSC	ACAM;Bi;BCA;EPRSS;Mem;Met;Or
Nnat	8.17825	13.9769	15.5158	13.2033	11.7044	8.3407	3.10862e-15	Singleton	Positive	P1
Tmem27	5.9	11.7	12.78	12.91	12.44	13.03	3.33067e-15	A;D;U	Positive	E15.5_Ngn3_Het;P1;P60	IPS;ITH;VTSC	Bi;BRB;BCA;CCDB;EPRSS;LT;Mem;Met;Or
Camk2b	4.63	11.09	12.72	12.92	13.03	12.52	3.66374e-15	A;D	Positive	E15.5_Ngn3_Het;P1	CMP;GGA;IPS;ITH;PTSKA;VTSC	ACAM;Bi;BRB;BCA;CPGD;CCDB;DPR;Di;EPRSS;IS;LT;Mem;Met;Or;SP
Lrp11	6.5155	11.4026	13.167	12.7462	12.6976	12.6216	3.88578e-15	D	Positive	P1	VTSC	Bi;LT;Mem
Gpx3	9.0529	11.9195	14.8625	14.3422	13.1173	14.7133	4.10782e-15	D;U	Positive	P1;P60	Unclassified	BCA;CCDB;Or
Adamts9	13.6729	12.8306	7.36328	8.11629	8.10351	2.99243	4.21885e-15	C1	Negative	P60	Unclassified	Bi;BCA;CCDB;DPR;Met
Insm1	6.34	12.87	12.49	12.56	12.23	12.3	4.44089e-15	A	Positive	E15.5_Ngn3_Het	Unclassified	Bi;BCA;CPGD;CCDB;DPR;GIP;Met
Hepacam2	6.37	11.71	13.01	12.82	12.36	12.39	5.21805e-15	A;D	Positive	E15.5_Ngn3_Het;P1	Unclassified	Bi;CPGD;CCDB;Mem
Gng4	1.97	10.93	12.56	12.83	12.48	12.17	5.55112e-15	A;D	Positive	E15.5_Ngn3_Het;P1	GGA;IPS;MPIC	ACAM;Bi;BRB;BCA;CPGD;EPRSS;LT;Mem;Met;SP
Abcc8	10.07	13.95	14.9	15.07	14.84	14.61	5.66214e-15	A;D	Positive	E15.5_Ngn3_Het;P1	IPS;ITH;MPIC	Bi;BCA;Di;EPRSS;LT;Met;SP
Vdr	6.23	11.17	12.55	12.95	12.27	13.49	6.77236e-15	A;D;U	Positive	E15.5_Ngn3_Het;P1;P60	ITH	Bi;BRB;BCA;CPGD;DPR;EPRSS;GIP;LT;Met;SP
Prlr	5.88387	5.27634	12.3331	12.6694	13.5795	15.5679	6.99441e-15	U;V	Positive	P60	PTSKA	Bi;BRB;CCDB;DPR;EPRSS;IS
Fbxl16	4.68	11.34	12.49	12.68	12.46	12.76	8.54872e-15	A;D	Positive	E15.5_Ngn3_Het;P1	Unclassified	Bi;CCDB
Tmem215	0.528321	7.65862	12.689	12.9239	12.7909	13.0206	9.4369e-15	D	Positive	P1	Unclassified	Mem
Celf3	5.67	12.15	12.53	12.52	12.24	12.2	9.54792e-15	A;D	Positive	E15.5_Ngn3_Het;P1	Unclassified	CCDB;DPR;GIP;LT;Met
Chic1	8.184	11.3438	13.1375	13.3625	13.1002	13.384	1.04361e-14	D;U	Positive	P1;P60	VTSC	Mem;Or
2210010C04Rik	6.0936	5.25288	7.57785	14.817	16.0969	8.87667	1.15463e-14	Predicted_contaminant
Cckar	14.1981	12.794	4.82156	9.22007	11.1574	1.86165	1.15463e-14	A1;C1	Negative	P60	IPS	ACAM;DPR;EPRSS;LT;Mem
Mafb	6.83218	12.0835	13.7274	13.0011	12.0358	7.83969	1.18794e-14	E	Positive	P1	Unclassified	ACAM;Bi;BRB;BCA;DPR;GIP
Frzb	6.07552	9.32151	12.6156	13.116	13.3366	11.8043	1.23235e-14	D;O	Positive	P1;P12	Unclassified	Bi;BRB;CPGD;CCDB;DPR;EPRSS;GIP
Slc2a5	4.65043	9.80326	12.7527	12.6296	12.6995	12.8977	1.35447e-14	D	Positive	P1	GGPMTC	EPRSS;LT;Mem;Met;Or;SP
Myt1	3.3	12.46	12.64	12.06	11.74	10.82	1.42109e-14	A	Positive	E15.5_Ngn3_Het	Unclassified	Bi;BCA;DPR;GIP
Slc7a2	8.93312	12.3855	14.1414	13.4279	13.4522	12.4005	1.44329e-14	D	Positive	P1	ITH	CCDB;EPRSS;LT;Met
Cyr61	13.6298	12.802	7.48205	9.2338	8.62468	5.97934	1.58762e-14	C1	Negative	P60	OOMA;PTSKA	ACAM;Bi;BCA;CPGD;CCDB;DPR;EPRSS;GIP;Met
Kif1a	7.04019	10.6343	12.7418	12.7878	12.6997	12.9627	1.63203e-14	D	Positive	P1	Unclassified	ACAM;Bi;BCA;CCDB;GIP;Met;SP
Aplp1	9.53	13.5	14.1	13.95	13.54	13.57	1.69864e-14	A;D	Positive	E15.5_Ngn3_Het;P1	GGA;VTSC	ACAM;Bi;BCA;CPGD;CCDB;DPR;EPRSS;GIP;LT;Mem;Met
Rims3	6.1199	9.31009	13.2553	12.3943	12.6249	12.9003	1.86517e-14	D	Positive	P1	MPIC;VTSC	ACAM;Bi;LT
Ppp1r1a	3.21	9.72	12.77	12.43	12.27	12.68	1.87628e-14	A;D	Positive	E15.5_Ngn3_Het;P1	OOMA	ACAM;Bi;BCA;CCDB;EPRSS;Met
Flrt2	12.8386	11.5104	5.86679	6.34351	6.63366	0.333333	1.90958e-14	C1	Negative	P60	Unclassified	ACAM;Bi;CCDB;Mem;Or
Fam129a	13.1197	11.4524	4.76257	7.70075	8.94792	6.17028	1.94289e-14	J	Negative	P1	Unclassified	Met
Camk2n1	8.26877	11.6244	13.1995	12.9717	12.8782	13.0646	2.18714e-14	D	Positive	P1	Unclassified	ACAM;Bi;BCA;Mem;Met;SP
Rfx6	2.83	12.2	12.43	11.7	11.83	10.76	2.18714e-14	A	Positive	E15.5_Ngn3_Het	GGPMTC;IPS	Bi;BRB;BCA;DPR;GIP;LT
Sez6l	3.71425	9.58535	12.5137	12.9237	12.7223	11.1561	2.36478e-14	D;O	Positive	P1;P12	Unclassified	BRB;CCDB;DPR;EPRSS;LT;Mem;Or;SP
Cadps	4.14	11.54	12.06	12.15	12.05	12.26	3.06422e-14	A;D	Positive	E15.5_Ngn3_Het;P1	VTSC	ACAM;Bi;LT;Mem
Slc24a2	0	8.09112	11.8848	12.346	12.5748	11.8894	3.08642e-14	D	Positive	P1	CMP;ITH;MPIC	Bi;BRB;LT;Mem;SP
Mt2	13.4952	12.1185	6.4428	8.25179	9.54202	9.64705	3.23075e-14	J	Negative	P1	Unclassified	ACAM;EPRSS
Trp53inp2	8.8139	11.6387	13.3151	13.2579	13.3885	13.4928	3.37508e-14	D	Positive	P1	Unclassified	Bi;BCA;CCDB;DPR;GIP;Met;Or;SP
Adamts1	13.6722	13.5954	7.7155	8.98234	9.03972	5.14968	3.40838e-14	C1	Negative	P60	Unclassified	Bi;BCA;CCDB;DPR;Mem;Met
Phactr1	4.11495	9.02672	12.4561	12.582	12.5718	12.6068	3.475e-14	D	Positive	P1	Unclassified	ACAM;Bi;BCA;CCDB;GIP;LT
Igf2	14.5738	13.2862	10.655	10.0687	9.26004	7.55327	4.13003e-14	C1;J;T	Negative	P1;P12;P60	CMP;GGPMTC;IPS;PTSKA;VTSC	Bi;BRB;BCA;CPGD;CCDB;DPR;Di;EPRSS;GIP;IS;Met;Or;SP
Slc16a10	8.05246	11.3888	12.8999	13.1121	12.3996	12.68	4.37428e-14	D	Positive	P1	ITH	LT;Mem
Cdhr1	1.19499	9.77619	12.626	11.8393	11.5533	10.827	4.4631e-14	D	Positive	P1	CMP	ACAM;Bi;BRB;CCDB;Mem;SP
Arhgap36	2.38998	10.1964	13.8623	12.196	10.535	9.13429	4.5075e-14	D	Positive	P1	GGA	BCA;CCDB
Slc43a2	8.11355	11.3309	13.1101	12.7165	13.0276	12.0272	4.67404e-14	D	Positive	P1	ITH	LT;Mem
Ids	9.44	13.13	13.23	13.53	13.5	13.66	5.4512e-14	A;D	Positive	E15.5_Ngn3_Het;P1	Unclassified	Bi;BCA;Or
Pnmal2	8.72099	11.644	12.887	13.1625	13.1743	13.1295	6.67244e-14	D	Positive	P1
Stxbp1	7	10.77	12.57	12.3	12.37	12.48	6.89449e-14	A;D	Positive	E15.5_Ngn3_Het;P1	VTSC	ACAM;Bi;BRB;CPGD;CCDB;DPR;EPRSS;GIP;LT;Mem;Or;SP
Nfasc	5.78889	10.1942	12.1293	12.3656	12.4557	12.5103	6.92779e-14	D	Positive	P1	MPIC	ACAM;Bi;CCDB;DPR;LT;Mem;Or;SP
Scnn1b	1.3023	7.51244	11.7522	12.407	12.3233	11.8923	7.41629e-14	D	Positive	P1	ITH;MPIC	Bi;BRB;EPRSS;LT;Mem;Or;SP
Gck	6.58	11.44	12.55	12.22	12.06	11.45	7.51621e-14	A;D	Positive	E15.5_Ngn3_Het;P1	GGPMTC;IPS;ITH;OOMA;OMPFAA;VTSC	ACAM;Bi;BRB;BCA;CCDB;DPR;Di;EPRSS;GIP;LT;Met;Or
Syp	5.01	9.86	12.08	12.28	12	13.09	8.53761e-14	A;D	Positive	E15.5_Ngn3_Het;P1	GGA;VTSC	ACAM;Bi;BRB;CCDB;EPRSS;LT;Mem;SP
Pla2g2f	6.81	11.32	12.02	12.18	12.52	12.03	8.67084e-14	A;D	Positive	E15.5_Ngn3_Het;P1	CMP;GGA;OMPFAA	Bi;BCA;CCDB;EPRSS;LT;Met;SP
Adra2a	6.57	10.85	12.36	12.4	12	12.31	8.9373e-14	A;D;U	Positive	E15.5_Ngn3_Het;P1;P60	GGPMTC;GGA;IPS;PTSKA;VTSC	ACAM;Bi;BRB;BCA;CCDB;DPR;EPRSS;LT;Mem;Met;SP
Glp1r	2.3023	7.15981	11.4726	12.3951	12.8102	12.399	9.08162e-14	D	Positive	P1	GGA;IPS;ITH	BRB;EPRSS;LT;Mem;Met;SP
Ppy	0.53	9.46	10.98	12.08	12.04	10.24	9.22595e-14	A;D	Positive	E15.5_Ngn3_Het;P1	GGA	Bi;CCDB;EPRSS
Gstm1	13.4393	11.9228	8.37809	8.86398	9.4966	8.94148	9.81437e-14	C1;J	Negative	P1;P60	OOMA	Bi;BCA;Di;EPRSS;Met
Bace2	6.10392	6.50643	11.9892	13.0212	12.8563	13.1215	1.02141e-13	D	Positive	P1	Unclassified	BCA;Mem;Met;Or
Rbpjl	13.4138	11.7269	2.74294	9.30955	10.3459	1.38998	1.03029e-13	A1	Negative	P60
Celsr3	4.98	11.09	12.21	12.05	11.88	11.43	1.10356e-13	A;D	Positive	E15.5_Ngn3_Het;P1	CMP;GGA	ACAM;Bi;CCDB;EPRSS;LT;Mem
Fam151a	1.52832	8.71265	12.0021	11.6437	11.7998	11.549	1.11133e-13	D	Positive	P1	Unclassified	Mem;Or
Mapk8ip2	3.32	10.24	11.81	11.87	11.78	11.86	1.16907e-13	A;D	Positive	E15.5_Ngn3_Het;P1	ITH;MPIC	ACAM;Bi;BRB;BCA;CCDB;DPR;EPRSS;LT;Mem;SP
Cacna2d1	7.34	12.29	12.18	12.03	12.05	11.57	1.1946e-13	A;D	Positive	E15.5_Ngn3_Het;P1	ITH;MPIC	Bi;CCDB;LT;Mem
Slc2a2	9.56577	11.1423	14.4668	13.9835	13.6915	13.6581	1.30673e-13	D	Positive	P1	GGPMTC;IPS;ITH	CCDB;DPR;LT;Mem;Met
Resp18	1.44064	8.62039	10.3824	11.279	12.1364	13.6944	1.37335e-13	D;U	Positive	P1;P60	VTSC	CCDB;Or;SP
Cacna1a	7.31	12.23	12.21	12.24	11.65	11.6	1.4444e-13	A;D	Positive	E15.5_Ngn3_Het;P1	GGPMTC;GGA;IPS;ITH;MPIC;VTSC	ACAM;Bi;BRB;BCA;CPGD;CCDB;DPR;Di;EPRSS;GIP;LT;Mem;Met;SP
Hmga2	12.505	11.8563	5.22942	4.7119	3.57142	2.13077	1.46993e-13	C1;T	Negative	P12;P60	PTSKA;VTSC	ACAM;Bi;BRB;BCA;CPGD;CCDB;DPR;Di;EPRSS;GIP;LT;Met
Gata4	12.5037	10.9651	5.24657	7.3785	8.06696	3.55095	1.48659e-13	C1	Negative	P60	GGPMTC;PTSKA	Bi;BCA;CPGD;DPR;EPRSS;GIP;LT;Met;Or;SP
Ap3b2	3.96	10.23	11.62	11.97	11.87	12.14	1.52101e-13	A;D;U	Positive	E15.5_Ngn3_Het;P1;P60	VTSC	ACAM;CCDB;GIP;LT;Mem;Or
St18	4.97	11.48	12.02	11.72	11.7	11.42	1.56541e-13	A	Positive	E15.5_Ngn3_Het	Unclassified	Bi;BCA;GIP
Sstr3	3.18741	8.8679	11.9296	11.6988	11.9561	12.5685	1.56764e-13	D;U	Positive	P1;P60	GGA	Bi;CCDB;DPR;EPRSS;Mem
Isl1	4.17	12.44	11.39	11.4	11.14	11.22	1.57763e-13	A	Positive	E15.5_Ngn3_Het	IPS;VTSC	ACAM;Bi;CPGD;DPR;EPRSS;GIP;LT;Met
Nr5a2	12.5807	11.5957	6.71792	7.31396	7.84006	0.528321	1.60205e-13	C1	Negative	P60	IPS;OMPFAA	Bi;BRB;CPGD;CCDB;DPR;Di;EPRSS;GIP;Met
Pak3	8.32	12.12	12.52	12.94	12.42	11.3	1.662e-13	A;D;O	Positive	E15.5_Ngn3_Het;P1;P12	PTSKA	Bi;BRB;BCA;CPGD;CCDB;DPR;EPRSS;GIP;LT;Met;Or
Hes1	12.5414	11.3362	5.48202	7.84091	7.53239	6.02632	1.71307e-13	C1;J	Negative	P1;P60	PTSKA	ACAM;Bi;BRB;BCA;CPGD;DPR;EPRSS;GIP;IS;LT;Met;Or
Hif3a	12.4202	11.3297	7.08497	6.36282	5.95183	1.33333	1.73084e-13	C1	Negative	P60	OOMA	Bi;CCDB;EPRSS;GIP;Mem
Tmod2	5.96139	9.3097	12.3051	12.3848	11.941	12.6377	1.87628e-13	D	Positive	P1	GGA	ACAM;Bi;CCDB;EPRSS;SP
Cpa2	15.9511	14.591	7.86798	13.2618	14.8663	7.39982	2.0095e-13	Predicted_contaminant
Igsf1	7.8923	9.85634	13.5609	13.0831	12.1593	11.0058	2.18381e-13	D	Positive	P1	Unclassified	Mem
Gng12	10.18	12.86	14.34	14.17	14.03	13.98	2.20157e-13	A;D	Positive	E15.5_Ngn3_Het;P1	GGA;IPS;MPIC	ACAM;Bi;BRB;BCA;CCDB;DPR;EPRSS;LT;Mem;Met;Or;SP
Syndig1l	0.861654	7.99446	11.2098	11.3819	11.3622	12.2335	2.63012e-13	D	Positive	P1	Unclassified	Mem;Or
Vat1l	3.47	10.91	11.84	11.68	11.2	10.32	2.65565e-13	A	Positive	E15.5_Ngn3_Het	Unclassified	Bi;BCA;Met
Ucn3	0.861654	5.6079	10.0254	11.1656	13.2019	13.3652	2.74336e-13	D;P;U	Positive	P1;P12;P60	GGPMTC;GGA;MPIC;OOMA;VTSC	Bi;CCDB;EPRSS;LT;Mem;SP
P2rx1	12.3171	10.7733	2.9183	7.09613	8.34321	0.333333	2.75002e-13	A1;C1	Negative	P60	ITH;MPIC	ACAM;Bi;BRB;BCA;CCDB;EPRSS;GIP;LT;Mem;Met;SP
Plk2	12.9505	12.1135	8.31681	8.8731	8.38861	6.92151	2.79665e-13	C1	Negative	P60	GGA;PTSKA	Bi;BRB;BCA;CPGD;CCDB;DPR;EPRSS;Met;SP
Snap25	4.04609	9.44754	11.5443	11.8856	11.9392	12.1692	2.87215e-13	D;U	Positive	P1;P60	IPS;VTSC	ACAM;Bi;BRB;CCDB;DPR;EPRSS;LT;Mem;Or;SP
Maob	8.06024	10.4431	12.7348	12.3411	12.6064	12.6121	3.17857e-13	D;U	Positive	P1;P60	ITH;OOMA;VTSC	ACAM;Bi;BCA;DPR;EPRSS;LT;Mem;Met;Or
Mest	12.4908	11.3897	8.01239	7.65819	7.02937	4.78661	3.20855e-13	C1	Negative	P60	Unclassified	BCA;EPRSS;Mem;Met;Or
Igf1	12.4269	10.9834	5.03743	7.50366	8.76562	0.528321	3.40838e-13	C1	Negative	P60	CMP;GGPMTC;GGA;IPS;OOMA;VTSC	ACAM;Bi;BRB;BCA;CPGD;CCDB;DPR;Di;EPRSS;GIP;IS;LT;Met;Or;SP
Bmp7	12.2665	10.854	5.5819	7.29985	7.60923	0.861654	3.41394e-13	C1	Negative	P60	PTSKA	ACAM;Bi;BCA;CPGD;CCDB;DPR;EPRSS;GIP;LT;Met;Or;SP
Slc38a3	12.5755	11.0833	3.61412	8.08135	9.27221	1.77398	3.54938e-13	A1;C1	Negative	P60	ITH	LT;Mem
Zdbf2	7.85	12.76	12.74	11.97	11.6	9.63	3.72036e-13	A	Positive	E15.5_Ngn3_Het
Mgst1	12.3976	11.3118	7.9745	6.54075	7.20434	5.26724	3.82916e-13	C1	Negative	P60	OOMA	Bi;BCA;CCDB;DPR;Di;EPRSS;GIP;Mem;Met
Gatsl2	9.30002	12.972	13.5162	12.6162	12.6927	12.0856	3.85136e-13	D	Positive	P1
March4	#N/A	#N/A	#N/A	#N/A	#N/A	#N/A	3.96905e-13	A;D;U	Positive	E15.5_Ngn3_Het;P1;P60	VTSC	Bi;BCA;Mem;Met;Or
Soga2	7.34	10.7	12.57	12.33	12.06	11.13	4.00679e-13	A;D	Positive	E15.5_Ngn3_Het;P1	Unclassified	Bi;BRB;BCA;CPGD;CCDB;GIP;LT;Mem;Met
Muc1	12.9657	12.0173	7.45465	8.91516	9.57305	4.27126	4.10338e-13	C1	Negative	P60	OOMA	CCDB;DPR;EPRSS;GIP;Mem;Met
Frem2	12.9835	11.9546	9.16032	9.02126	8.35855	5.45896	4.19886e-13	C1	Negative	P60	CMP	ACAM;Bi;DPR;Mem;Or
Sdk2	6.30764	8.77226	11.8797	12.5556	12.4855	11.5768	4.34874e-13	D;U	Positive	P1;P60	Unclassified	Bi;Mem
Cpa1	17.1795	15.5983	8.45599	14.7974	16.1472	9.20198	4.51195e-13	Predicted_contaminant
Tmed8	9.17012	12.3878	13.1138	12.9883	12.8639	11.7239	4.55969e-13	D	Positive	P1	Unclassified	Mem
Hap1	9.1	12.42	12.58	13.2	12.38	12.8	4.56968e-13	A;D	Positive	E15.5_Ngn3_Het;P1	Unclassified	ACAM;CCDB;LT
Fmo1	6.49664	8.65226	11.3628	11.2172	12.9577	14.0436	4.57301e-13	U	Positive	P60	OOMA	EPRSS;Mem;Met;Or
Car9	11.8333	10.2144	2.66667	4.58238	4.60057	0	4.61631e-13	C1	Negative	P60	OOMA	Bi;CCDB;DPR;EPRSS;LT;Mem;Met
Tead2	12.4858	12.0209	5.65748	7.39094	8.12241	0.333333	4.63851e-13	C1	Negative	P60	Unclassified	Bi;CPGD;DPR;EPRSS;GIP
Glb1l2	6.5	10.78	12.33	12.3	11.43	11.04	4.70401e-13	A;D	Positive	E15.5_Ngn3_Het;P1	Unclassified	BCA;CCDB;Met
Rundc3a	6.18	10.56	11.89	11.91	11.8	11.97	5.03819e-13	A;D	Positive	E15.5_Ngn3_Het;P1	Unclassified	Bi;BCA;CCDB;GIP;Mem
Ambp	13.6529	12.9093	9.97674	9.98496	9.12382	7.21135	5.33462e-13	C1	Negative	P60	Unclassified	Bi;BCA;CCDB;GIP;Mem;Met;Or
Zcchc18	5.13	11.78	11.3	11.26	11.41	11.25	6.2339e-13	A	Positive	E15.5_Ngn3_Het	Unclassified	Bi;EPRSS;GIP;Or
Gc	12.4481	11.2456	7.03974	6.9449	8.76047	8.3536	6.72351e-13	J;N	Negative	P1;P4	Unclassified	LT;Met
Gja1	12.1766	11.1647	6.31416	7.21103	6.79644	2.72331	6.89559e-13	C1	Negative	P60	GGPMTC;IPS;ITH;MPIC	ACAM;Bi;BRB;BCA;CPGD;CCDB;DPR;Di;EPRSS;GIP;LT;Mem;Met;Or;SP
Amigo2	5.50763	10.0683	12.2787	11.8129	11.4968	11.1247	7.09655e-13	D	Positive	P1	Unclassified	ACAM;Bi;CPGD;GIP;Mem
Lpl	7.23855	9.31847	13.0026	11.9521	12.5054	10.4797	7.43183e-13	D	Positive	P1	Unclassified	BRB;CCDB;EPRSS;Or
Tmem97	13.3545	12.0936	8.30269	9.5446	10.6158	8.1573	7.78821e-13	C1;J	Negative	P1;P60	Unclassified	GIP;Mem;Or
Ece1	11.0073	13.3598	15.3639	14.9616	14.84	14.09	7.98361e-13	D	Positive	P1	Unclassified	Bi;BRB;BCA;CCDB;DPR;EPRSS;Mem;Met;Or;SP
Dmbt1	5.78272	5.69222	7.11826	13.817	14.4976	7.67353	8.02358e-13	Predicted_contaminant
Rab37	4.64	9.54	11.83	11.79	11.83	10.34	8.76965e-13	A;D	Positive	E15.5_Ngn3_Het;P1	GGA;VTSC	Bi;BCA;EPRSS;GIP;LT;Or
Itpkb	9.54	10.6373	13.6683	13.6246	13.5202	13.2437	9.15268e-13	D;U	Positive	P1;P60	CMP;GGA	ACAM;Bi;BRB;BCA;DPR;EPRSS;IS;Met
Gch1	8.21	11.33	12.17	12.31	12.21	12.03	9.43246e-13	A;D	Positive	E15.5_Ngn3_Het;P1	CMP;OMPFAA	Bi;BCA;CCDB;EPRSS;IS;Mem;Met;Or;SP
Mgll	12.205	10.861	6.01841	7.39232	8.42793	4.64573	9.43467e-13	C1	Negative	P60	OMPFAA	ACAM;Bi;BRB;BCA;EPRSS;IS;LT;Met
Ntrk2	6.09904	8.40224	11.2197	11.9277	12.3745	13.0857	9.62563e-13	D;U	Positive	P1;P60	GGA;PTSKA;VTSC	ACAM;Bi;BRB;BCA;CPGD;CCDB;DPR;EPRSS;LT;Mem;Met;Or;SP
Nol4	4.56	10.58	11.58	11.22	11.22	11.51	9.70113e-13	A	Positive	E15.5_Ngn3_Het	Unclassified	GIP
9330182L06Rik	5.20705	9.04325	12.3077	11.9628	11.2328	11.5406	9.73999e-13	D	Positive	P1	Unclassified	Mem
Tmem163	3.5	9.78	11.46	11.49	11.09	10.53	9.89764e-13	A;D	Positive	E15.5_Ngn3_Het;P1	Unclassified	ACAM;Bi;Mem
Pam	10.12	13.42	13.43	13.53	13.35	13.48	1.06337e-12	A;D;U	Positive	E15.5_Ngn3_Het;P1;P60	CMP;OOMA;OMPFAA;VTSC	Bi;BRB;BCA;CCDB;DPR;EPRSS;GIP;LT;Mem;Met;Or;SP
Habp2	12.3662	11.9587	5.07053	7.36959	8.56228	0	1.09379e-12	C1	Negative	P60	CMP	Bi;BCA;Met
Gm5424	12.3001	10.7519	8.3694	8.12768	7.99806	5.73587	1.16263e-12	C1	Negative	P60	OMPFAA	Bi;BCA;Met
Gipr	3.84	9.82	11.18	11.5	11.37	10.78	1.16918e-12	A;D	Positive	E15.5_Ngn3_Het;P1	CMP;GGPMTC;GGA;IPS;ITH;OMPFAA	Bi;BRB;BCA;DPR;EPRSS;GIP;LT;Mem
Afp	11.383	9.88769	0	3.90945	3.38494	0	1.21825e-12	C1;J	Negative	P1;P60	PTSKA	CCDB;DPR;EPRSS;Met
Dst	10.54	13.23	14.38	14.03	13.97	13.74	1.2278e-12	A;D	Positive	E15.5_Ngn3_Het;P1	CMP	ACAM;Bi;CPGD;CCDB;DPR;EPRSS;GIP;LT;Or
Myo5c	12.2221	11.0991	7.24601	7.83657	8.2073	1.60245	1.26343e-12	C1	Negative	P60	Unclassified	Bi;BCA;CCDB
Scn9a	3.72331	8.46703	11.1385	11.5372	11.2735	12.3493	1.27931e-12	D	Positive	P1	ITH;MPIC	Bi;EPRSS;LT;Mem;SP
Ffar1	1	7.80563	11.0075	11.0691	10.8712	10.1857	1.28286e-12	D	Positive	P1	GGPMTC;GGA;IPS;PTSKA	Bi;BRB;EPRSS;LT;Mem;Met
Chst2	12.6033	10.8886	5.7135	8.72669	10.3742	3.95058	1.28841e-12	C1	Negative	P60	Unclassified	BCA;CCDB;Di;EPRSS;Mem;Or
Dbpht2	2.39	11.82	10.95	10.63	9.82	7.82	1.37435e-12	A	Positive	E15.5_Ngn3_Het
Lama5	13.6065	13.3714	10.2578	9.90696	9.32679	6.0204	1.4222e-12	C1	Negative	P60	IPS	ACAM;CPGD;CCDB;DPR;Di;EPRSS;GIP;LT;Mem;Or
Mafa	5.51208	8.70584	11.0804	11.5204	12.2305	12.8207	1.42275e-12	D;U	Positive	P1;P60	GGPMTC;IPS;VTSC	Di;EPRSS;GIP;LT
Slc7a8	8.99911	10.8585	12.6542	12.9783	12.8233	12.6422	1.49891e-12	D	Positive	P1	ITH	Bi;CCDB;LT;Mem;Or
Mt1	13.5262	12.254	8.21443	9.52263	10.6366	10.9036	1.54399e-12	J	Negative	P1	Unclassified	ACAM;EPRSS
Ephb4	12.1731	11.1723	7.34372	8.0168	7.73955	1.77398	1.6166e-12	C1	Negative	P60	PTSKA	ACAM;Bi;DPR;EPRSS;Mem;Met;Or
Kcnh6	4.8	11.2	11.04	11.44	11.17	9.99	1.87827e-12	A;D	Positive	E15.5_Ngn3_Het;P1	ITH;MPIC	BCA;EPRSS;GIP;LT;Mem;SP
Vstm2l	0.333333	5.61118	9.86987	10.7389	11.7155	12.104	1.88915e-12	D	Positive	P1	Unclassified	Bi
Robo2	6.15593	8.49628	12.4484	11.5337	11.4543	12.2654	2.05802e-12	D;U	Positive	P1;P60	Unclassified	ACAM;Bi;DPR;EPRSS;Mem;Or;SP
Ifitm3	11.9575	10.6948	5.23395	7.23389	8.10919	2.3023	2.06002e-12	C1	Negative	P60	VTSC	ACAM;CPGD;CCDB;DPR;EPRSS;GIP;IS;Mem;Or
Gm7901	12.3355	11.0019	7.93321	8.08752	8.45153	8.67144	2.07134e-12	J	Negative	P1
Tinagl1	12.1857	11.9336	7.25919	7.30441	7.52109	1.83062	2.27607e-12	C1	Negative	P60	VTSC	Bi;BCA;CCDB;EPRSS;IS;LT;Met;Or
Phgdh	12.2559	10.9492	7.86817	8.0389	8.30908	8.25303	2.30782e-12	C1;J;N	Negative	P1;P4;P60	OOMA;OMPFAA	Bi;BCA;CPGD;DPR;GIP;Met;Or
Map6	2.25	8.33	10.81	10.78	10.86	10.94	2.43061e-12	A;D	Positive	E15.5_Ngn3_Het;P1	CMP	Bi;CCDB;DPR;LT;Or
Rab27a	9.07741	11.2297	12.9108	12.6754	12.556	12.3132	2.44205e-12	D	Positive	P1	GGA;VTSC	ACAM;Bi;BRB;BCA;CCDB;DPR;EPRSS;IS;LT;Mem;Or;SP
1700086L19Rik	0.33	10.92	10.17	9.93	9.3	8.38	2.51665e-12	A	Positive	E15.5_Ngn3_Het
Slc38a1	12.5453	12.211	9.0408	8.29341	8.11509	1.79744	2.62168e-12	C1	Negative	P60	ITH	CCDB;LT;Mem;SP
Cdc42ep1	12.1002	11.0308	6.4392	7.52811	8.7184	3.32193	2.6894e-12	C1	Negative	P60	GGA	Bi;BRB;CCDB;DPR;EPRSS;Mem;Or
Mecom	11.7317	10.396	6.00514	6.47716	6.85954	0.528321	2.73803e-12	C1	Negative	P60	Unclassified	Bi;BRB;CPGD;DPR;Di;EPRSS;GIP;IS
Sox9	12.3996	11.9535	8.18468	8.58252	8.01673	2.57142	2.7881e-12	C1	Negative	P60	PTSKA	ACAM;Bi;BRB;BCA;CPGD;CCDB;DPR;EPRSS;GIP;IS;Met;SP
Gabbr2	1.77	8.1	10.55	10.47	10.63	11.42	2.80209e-12	A;D	Positive	E15.5_Ngn3_Het;P1	GGA;MPIC	ACAM;Bi;CCDB;EPRSS;LT;Mem;SP
Kcnmb2	3.8	8.99	11.44	10.98	11.22	10.62	2.90234e-12	A;D	Positive	E15.5_Ngn3_Het;P1	CMP;IPS;ITH;MPIC	BRB;EPRSS;IS;LT;SP
Shank2	12.359	11.7265	7.75884	8.45832	8.48751	5.40203	2.91767e-12	C1	Negative	P60	MPIC	ACAM;Bi;BRB;CCDB;DPR;EPRSS;LT;Mem;SP
Cabp7	3.34813	9.1349	11.0887	11.0549	11.0386	10.0722	3.12672e-12	D;U	Positive	P1;P60	CMP;VTSC	Bi;CCDB;Mem;Or
Slc38a5	6.96493	13.7031	12.6611	10.6011	8.54351	3.53578	3.13305e-12	Singleton	Positive	E15.5_Ngn3_Het
Anpep	13.7885	12.7274	9.61826	10.6994	11.0054	7.49584	3.27127e-12	C1	Negative	P60	Unclassified	Bi;BCA;CCDB;DPR;Mem;Met;Or
Kcnma1	1.64	8.74	10.76	10.51	10.15	10.18	3.34044e-12	A;D	Positive	E15.5_Ngn3_Het;P1	CMP;IPS;ITH;MPIC;OOMA	ACAM;Bi;BRB;CPGD;CCDB;DPR;EPRSS;LT;Mem;Met;Or;SP
Smad3	12.3659	11.3613	8.46591	8.41171	8.74034	5.72172	3.37641e-12	C1	Negative	P60	OOMA;PTSKA;VTSC	ACAM;Bi;BRB;BCA;CPGD;CCDB;DPR;Di;EPRSS;GIP;IS;LT;Mem;Met;SP
Pnmal1	2.83	9.62	10.75	10.69	10.69	9.9	3.3975e-12	A	Positive	E15.5_Ngn3_Het
Dnah9	4.94627	10.9453	12.3517	11.474	10.1272	7.38232	3.4347e-12	E;L	Positive	P1;P4	Unclassified	CCDB;Met
Zfhx2	8.40301	10.6513	12.0539	12.5603	12.1479	11.971	3.52884e-12	D	Positive	P1	Unclassified	Bi;BRB;GIP;Or
Gad1	0	7.48	10.74	10.09	10.06	10.56	3.54805e-12	A;D	Positive	E15.5_Ngn3_Het;P1	IPS;OMPFAA;VTSC	ACAM;Bi;BCA;CCDB;Di;EPRSS;LT;Met;SP
Npy	1.38998	8.54307	11.9298	9.61539	9.42732	10.1986	3.64286e-12	D	Positive	P1	GGA	Bi;DPR;EPRSS;SP
Prss53	3.86509	6.45806	10.9845	11.0527	11.5726	12.9504	3.73346e-12	U	Positive	P60	Unclassified	BCA;CCDB;Met
Nptxr	6.37737	8.76211	11.9075	11.7351	11.7527	11.6662	3.86713e-12	D	Positive	P1
Ero1lb	11.0855	12.1631	14.8231	14.7339	14.8917	15.808	3.87412e-12	D;U	Positive	P1;P60	IPS;OOMA;OMPFAA	Bi;BCA;CCDB;LT;Mem;Met
Id2	12.3246	11.588	7.81476	8.60584	8.50854	7.15084	4.00624e-12	C1;J;T	Negative	P1;P12;P60	MPIC;PTSKA	Bi;BRB;CPGD;CCDB;DPR;EPRSS;GIP;IS;Met
Yap1	11.8921	11.1518	6.50456	6.98554	7.5287	2.04309	4.13447e-12	C1	Negative	P60	PTSKA	Bi;BRB;CPGD;CCDB;DPR;EPRSS;GIP;Mem;Met
Cpeb1	1.3023	6.50058	9.94524	10.614	10.9643	11.9289	4.13991e-12	D;U	Positive	P1;P60	IPS;OOMA	ACAM;Bi;BRB;BCA;CPGD;CCDB;DPR;EPRSS;GIP;Mem;Met;Or
Klhl32	5.18866	9.7708	11.2219	11.5095	11.2649	11.0374	4.23195e-12	D	Positive	P1	Unclassified	Bi
Cat	12.6754	12.46	8.84366	8.74363	9.00848	6.66901	4.33131e-12	C1	Negative	P60	OOMA	Bi;BCA;CPGD;CCDB;DPR;Di;EPRSS;GIP;Mem;Met;Or
Gpr158	0	3.98279	9.81903	10.4895	11.3041	12.3291	4.33831e-12	D;U	Positive	P1;P60	GGA	Bi;EPRSS;LT;Mem
Slitrk6	4.07	9.67	11.19	10.83	10.65	11.18	4.40759e-12	A;D	Positive	E15.5_Ngn3_Het;P1	Unclassified	Bi;BRB;CPGD;DPR;EPRSS;Mem;SP
Ntn1	11.9987	10.4664	5.81921	7.98032	9.193	3.67389	4.47731e-12	C1	Negative	P60	Unclassified	ACAM;Bi;BRB;CPGD;CCDB;DPR;LT;Mem
Tmem229b	8.61811	10.0375	12.5956	12.7798	12.0938	12.0868	4.74909e-12	D	Positive	P1	Unclassified	Mem
Cbs	12.533	11.0929	6.25345	8.18449	10.0122	10.4799	4.80982e-12	G	Negative	P1
Lmnb1	13.3131	12.4542	10.1993	9.84995	9.79677	7.74376	4.95526e-12	C1	Negative	P60	PTSKA	Bi;BCA;CPGD;CCDB;EPRSS;GIP;Mem
Cntfr	5.10825	8.33752	12.249	11.5673	10.9433	10.5255	5.01488e-12	D	Positive	P1	Unclassified	Bi;BRB;CPGD;CCDB;DPR;EPRSS;Mem
Sptbn4	4.30041	8.09138	10.9186	11.2982	11.4447	11.6595	5.02365e-12	D;U	Positive	P1;P60	ITH;MPIC	ACAM;Bi;BRB;CPGD;CCDB;DPR;GIP;LT;Mem;Met;SP
Uhrf1	12.5167	11.3803	8.51432	9.419	9.01451	7.31696	5.08593e-12	C1	Negative	P60	Unclassified	Bi;BCA;CPGD;GIP;Met;Or
Mgat4a	12.781	11.8624	9.24041	9.16709	9.25675	8.45385	5.11269e-12	C1;J	Negative	P1;P60	VTSC	Bi;BCA;LT;Mem;Met;Or
Gamt	11.7611	10.3111	5.45772	7.36443	8.26963	3.52329	5.26279e-12	C1	Negative	P60	OMPFAA	BCA;CPGD;CCDB;DPR;Met;Or
Rgag4	5.98	10.82	11.18	11.39	11.3	10.75	5.34484e-12	A	Positive	E15.5_Ngn3_Het
Clca1	11.2995	9.69438	4.78374	5.70147	4.25079	2.63563	5.75995e-12	C1;J	Negative	P1;P60	ITH;MPIC	Bi;EPRSS;LT;Mem
Mdk	11.8652	12.1449	6.14485	6.03552	6.37455	0.333333	5.84965e-12	C1	Negative	P60	Unclassified	ACAM;Bi;BCA;CPGD;CCDB;DPR;EPRSS;GIP;SP
Tmem178b	3.13077	9.2255	11.2672	10.3206	10.2657	10.2672	6.21114e-12	D	Positive	P1	Unclassified	Mem
Scrn1	5.81	9.81	11.35	11.33	11.19	11.72	6.43252e-12	A;D	Positive	E15.5_Ngn3_Het;P1	VTSC	BCA;CCDB;LT;Mem;Met
Homer2	11.9206	10.9753	6.63902	7.42599	8.69298	1.96896	6.58984e-12	C1	Negative	P60	CMP;GGA	ACAM;Bi;BRB;CCDB;EPRSS;GIP;Mem;SP
Rapgef4	6.49	9.93	11.42	11.53	11.59	11.45	6.62392e-12	A;D	Positive	E15.5_Ngn3_Het;P1	GGA;IPS;VTSC	Bi;BRB;BCA;CCDB;EPRSS;IS;LT;Mem;Met
Pitpnm3	3.53578	6.63208	10.6608	11.6289	11.1478	11.4221	6.70619e-12	D;U	Positive	P1;P60	Unclassified	Bi;LT;Mem
Ctrl	4.83881	3.50785	5.82177	11.874	14.8988	7.46885	6.79312e-12	Predicted_contaminant
Cd24a	13.8196	13.6178	10.4868	10.3895	10.4245	7.33715	6.79434e-12	C1	Negative	P60	ITH;OOMA;PTSKA;VTSC	ACAM;Bi;BRB;BCA;CPGD;CCDB;DPR;EPRSS;IS;LT;Mem;Met;SP
Cldn10	11.4571	10.1711	3.45544	6.49663	7.28001	0.333333	6.88916e-12	C1	Negative	P60	Unclassified	ACAM;Bi;CCDB;IS;Mem;Or
Nell1	3.08893	5.53257	9.96674	11.1182	11.805	12.2332	7.16815e-12	D;U	Positive	P1;P60	CMP	Bi;CPGD;CCDB;DPR;GIP;LT;Met;SP
Mapt	5.18	10.39	11.29	11.47	10.21	10.87	7.29439e-12	A;D	Positive	E15.5_Ngn3_Het;P1	Unclassified	ACAM;Bi;BRB;CCDB;DPR;EPRSS;GIP;LT;Mem;Or;SP
Abca7	8.36	10.82	12.36	12.03	11.96	11.25	7.44638e-12	A;D;U	Positive	E15.5_Ngn3_Het;P1;P60	ITH;VTSC	Bi;BRB;BCA;CCDB;EPRSS;LT;Mem;Met;Or;SP
Id1	11.3042	10.3168	4.37643	4.40477	4.88689	0.773976	7.51665e-12	C1	Negative	P60	PTSKA	Bi;BRB;CPGD;DPR;EPRSS;GIP;Met;Or
Ptf1a	10.9734	9.44439	0	4.40477	5.57242	0	7.61646e-12	C1;J	Negative	P1;P60	Unclassified	Bi;BRB;CCDB;DPR;GIP;Met;Or
Dusp9	10.8988	9.86894	3.37643	2.40961	2.10731	0	7.91345e-12	C1	Negative	P60	PTSKA	Bi;BCA;EPRSS;Met;Or
Lamb1	13.5734	13.4759	10.76	10.4208	9.48807	5.10348	8.05644e-12	C1	Negative	P60	IPS	ACAM;Bi;CCDB;DPR;Di;EPRSS;Mem;Or;SP
Eml5	8.76	11.35	12.15	12.03	12.07	12.27	8.17335e-12	A;D	Positive	E15.5_Ngn3_Het;P1	Unclassified	Bi;CCDB;Or
Zfp92	3.32241	8.94399	10.4092	10.773	10.6744	10.609	8.22919e-12	D	Positive	P1	Unclassified	Bi;GIP
Tnr	2.05664	8.09219	11.8927	10.609	10.0838	5.95635	8.55172e-12	D	Positive	P1	Unclassified	ACAM;Bi;BRB;CPGD;CCDB;DPR;Mem;Or
BC007180	1.3023	7.07522	9.76861	10.626	10.3169	10.8429	8.64075e-12	D	Positive	P1
Try4	7.07546	5.79018	6.70706	13.2678	14.0917	8.6965	8.74822e-12	Predicted_contaminant
Casr	5.39	9.23	11.25	11.59	11.26	10.63	8.75744e-12	A;D	Positive	E15.5_Ngn3_Het;P1	CMP;GGPMTC;GGA;IPS;ITH;MPIC;OOMA;PTSKA	ACAM;Bi;BRB;BCA;CPGD;CCDB;DPR;EPRSS;GIP;LT;Mem;SP
Matn4	11.1314	9.42798	2.73322	5.52197	6.35217	0.333333	8.7611e-12	C1	Negative	P60	CMP	Bi;CCDB;EPRSS
Fam183b	3.41	10.11	10.67	10.09	10.2	10.36	9.04799e-12	A	Positive	E15.5_Ngn3_Het
Myt1l	0.53	7.6	9.53	10.28	10.18	9.88	9.7713e-12	A;D	Positive	E15.5_Ngn3_Het;P1	Unclassified	Bi;GIP
Csrp2	11.7406	10.7367	7.22137	7.1194	7.86041	3.24828	9.90086e-12	C1	Negative	P60	Unclassified	Bi;DPR;GIP
Dock1	12.0889	11.5202	8.29551	8.08376	8.21011	3.93793	9.97524e-12	C1	Negative	P60	GGA;VTSC	ACAM;Bi;BRB;BCA;CPGD;CCDB;DPR;Di;EPRSS;GIP;IS;LT;Mem
Fam219a	6.56308	10.4109	11.3602	11.4549	11.2304	11.2504	1.00437e-11	D	Positive	P1
Nupr1	12.0317	10.5293	3.1823	8.30812	9.17365	9.55943	1.0112e-11	Singleton	Negative	P1
Wfs1	8.89603	10.6065	11.8854	12.5458	12.4898	12.6683	1.01502e-11	D;K;U	Positive	P1;P4;P60	CMP;GGPMTC;ITH	Bi;BRB;CPGD;DPR;EPRSS;GIP;LT;Mem;Met;SP
Lhfpl4	3.19499	7.76006	10.4744	10.5896	10.7501	11.5216	1.01996e-11	D	Positive	P1	Unclassified	Mem
Coro2b	6.28015	8.97951	11.2104	11.7218	11.4444	11.826	1.02447e-11	D;U	Positive	P1;P60	Unclassified	Bi;CCDB;Mem;Or
Rph3al	9.31	12.37	12.48	12.25	12.19	11.82	1.04371e-11	A	Positive	E15.5_Ngn3_Het	GGPMTC;GGA;VTSC	Bi;BRB;EPRSS;LT;Or
Ogdhl	9.05178	9.82709	13.1707	12.253	12.3091	13.1282	1.08201e-11	D;U	Positive	P1;P60	OOMA;OMPFAA	Bi;BCA;Met
Smoc1	12.29	12.2254	8.73211	8.56968	7.86649	4.53866	1.09405e-11	C1	Negative	P60	CMP	ACAM;Bi;BRB;CCDB;DPR;EPRSS;Mem
Gas6	12.0685	10.9914	7.59166	8.41405	9.16495	4.58718	1.10661e-11	C1	Negative	P60	CMP;GGPMTC;ITH;MPIC;PTSKA;VTSC	ACAM;Bi;BRB;BCA;CPGD;CCDB;DPR;EPRSS;GIP;IS;LT;Met;Or;SP
Gdap1l1	3.9339	10.2006	10.8877	10.484	9.98993	10.311	1.10897e-11	D	Positive	P1	Unclassified	Bi
Cntn1	2.57142	7.50645	11.1309	10.5654	9.42778	11.2926	1.11236e-11	D;U	Positive	P1;P60	ITH	ACAM;Bi;CCDB;DPR;Di;EPRSS;GIP;LT;Mem;Or
Gdap1	3.15	8.62	10.5	10.2	10.38	11.32	1.13725e-11	A;D	Positive	E15.5_Ngn3_Het;P1	Unclassified	Bi;EPRSS;GIP;LT;Mem;Or
Lrrc10b	1	7.41117	9.57167	9.86109	10.3237	10.8545	1.15967e-11	D	Positive	P1	Unclassified	Bi
Wwc1	12.5495	11.9015	8.98	9.00323	9.15224	8.32835	1.18017e-11	C1;J	Negative	P1;P60	Unclassified	ACAM;Bi;CPGD;CCDB;EPRSS;GIP;Mem;Met;Or
Fbln2	12.5004	11.0774	9.49043	9.66161	9.25902	1.63563	1.26158e-11	C1	Negative	P60	Unclassified	CCDB
Shmt1	11.7436	10.6045	7.71137	7.46209	7.52784	6.46348	1.26168e-11	C1;J;N	Negative	P1;P4;P60	OMPFAA	Bi;BCA;CCDB;Di;GIP;Met;Or
Cxcl12	11.8161	12.3421	6.82342	7.02667	7.36225	1.77398	1.3362e-11	C1	Negative	P60	GGA;ITH;OOMA	ACAM;Bi;BRB;CPGD;CCDB;DPR;EPRSS;IS;LT;Mem;Or
Map3k15	7.24	11.54	11.31	11.16	10.63	11.88	1.39045e-11	A;U	Positive	E15.5_Ngn3_Het;P60	Unclassified	Bi;BCA;EPRSS;Met
Fabp5	11.6985	10.5718	7.50808	7.61388	7.3668	5.90825	1.40924e-11	C1;J	Negative	P1;P60	GGPMTC;OMPFAA	Bi;BCA;EPRSS;LT;Met;Or
Efcab1	7.18715	10.5896	11.4008	11.3485	11.2118	11.8851	1.43928e-11	D	Positive	P1	CMP	Bi
Cdk5r2	0.86	7.49	9.76	10	9.99	9.92	1.44259e-11	A;D	Positive	E15.5_Ngn3_Het;P1	PTSKA;VTSC	ACAM;Bi;BCA;CCDB;DPR;LT;Mem
Sdc3	8.13826	10.7526	12.4833	11.7405	10.99	11.7247	1.48091e-11	D	Positive	P1
B3galt5	4.34264	7.57154	10.4473	11.1881	11.3501	11.4018	1.48802e-11	D;U	Positive	P1;P60	Unclassified	BCA;Mem;Or
Clic6	11.5544	10.8091	6.7413	6.77542	6.95425	0	1.518e-11	C1	Negative	P60	GGA;ITH;MPIC	Bi;CCDB;LT;Mem;Or
Mcm5	12.7026	11.7692	8.69973	10.0202	9.52782	8.55573	1.54591e-11	C1;J	Negative	P1;P60	Unclassified	Bi;CPGD;CCDB;GIP;Mem;Met
Madd	9.77415	11.318	12.7705	13.2226	12.8797	12.8925	1.55829e-11	D;U	Positive	P1;P60	GGA;PTSKA	Bi;BCA;CPGD;CCDB;EPRSS;Mem
Psat1	12.1178	11.419	7.9487	8.1924	8.65845	8.62972	1.6372e-11	J	Negative	P1	OMPFAA	Bi;BCA;Met;Or
Ptn	11.4142	10.6626	5.45928	6.07545	6.29355	1.44064	1.64181e-11	C1	Negative	P60	Unclassified	Bi;CCDB;Or;SP
Snph	1.88129	7.37818	9.93831	10.0502	10.6812	9.8849	1.66377e-11	D	Positive	P1	VTSC	ACAM;Bi;CCDB;DPR;Mem;SP
Serpinf2	10.985	9.70748	4.63657	5.11356	3.83593	1.3023	1.74243e-11	C1	Negative	P60	CMP;VTSC	Bi;BRB;BCA;CPGD;CCDB;DPR;EPRSS;GIP;IS;Met;Or
Lingo1	6.43713	10.5203	10.8837	11.6588	11.4124	9.76684	1.76609e-11	D;O	Positive	P1;P12	Unclassified	Bi;BRB;CCDB;DPR;EPRSS;Mem
Parm1	12.7689	12.031	10.1822	9.87184	8.80306	7.15084	1.85114e-11	C1	Negative	P60	Unclassified	BCA;GIP;Mem;Or
Tmem130	3.6201	7.34839	9.91884	10.9706	10.7152	11.9216	1.90199e-11	D;U	Positive	P1;P60	Unclassified	Mem
Unc13a	6.98	10.21	11.24	11.58	11.16	11.59	1.90669e-11	A;D	Positive	E15.5_Ngn3_Het;P1	VTSC	ACAM;Bi;BRB;CCDB;DPR;EPRSS;LT;Mem;Met;Or;SP
Prune2	7.30535	9.92859	10.9915	11.3478	11.3677	13.0322	1.92731e-11	U	Positive	P60	Unclassified	GIP;Or
Cecr6	2.52832	9.22541	10.5997	10.3779	9.71944	7.68663	1.93117e-11	O	Positive	P12
Fam155a	2.92712	7.77109	10.0899	10.3136	10.4611	11.1121	1.94528e-11	D	Positive	P1	Unclassified	Mem
Ush2a	2.5	8.05	10.83	10.26	9.71	9.56	2.00936e-11	A;D	Positive	E15.5_Ngn3_Het;P1	Unclassified	Bi;BRB;CCDB;DPR;EPRSS;Mem;SP
Mapre3	7.4	10.89	11.6	11.33	11.27	10.88	2.02576e-11	A;D	Positive	E15.5_Ngn3_Het;P1	PTSKA	Bi;BCA;CPGD;CCDB;GIP;Met;Or
Arhgdig	12.2363	10.8236	8.63994	9.21281	9.48064	7.3151	2.05551e-11	C1	Negative	P60	GGA	Bi;BCA;CCDB;EPRSS;LT
Dtx4	11.5845	10.5897	6.58458	7.35262	7.70085	4.6956	2.07084e-11	C1	Negative	P60	Unclassified	Bi;BCA;CCDB;Di;EPRSS;IS;Met
Wipi1	9.06167	10.3799	12.9408	12.4224	11.9164	12.265	2.10859e-11	D	Positive	P1	VTSC	Bi;CCDB;LT;Mem;Met;Or
A530058N18Rik	0.666667	7.21254	9.4832	9.67259	9.83935	10.4616	2.11027e-11	D	Positive	P1
Slit1	3.38	9.55	11.56	9.9	9.29	9.03	2.15627e-11	A;D	Positive	E15.5_Ngn3_Het;P1	Unclassified	ACAM;Bi;BRB;CCDB;DPR;EPRSS;LT
Akt3	8.26	10.71	11.89	11.86	11.73	11.34	2.16175e-11	A;D	Positive	E15.5_Ngn3_Het;P1	GGA;IPS;PTSKA	ACAM;Bi;BCA;DPR;Di;EPRSS;GIP;Mem;Met;Or
Rps6ka2	8.33188	9.74796	12.0575	12.2141	12.005	11.4303	2.22316e-11	D;O	Positive	P1;P12	CMP;GGA;PTSKA	ACAM;Bi;BCA;CPGD;CCDB;DPR;EPRSS;GIP;IS;LT;Mem;Met;SP
Ccbe1	10.9089	9.43869	3.1823	4.63375	6.01819	2.25163	2.2823e-11	C1;J	Negative	P1;P60	CMP	ACAM;Bi;CCDB;DPR;EPRSS;Met
Grin1	1.68146	5.40961	10.0741	10.0589	10.7232	10.7965	2.31319e-11	D;U	Positive	P1;P60	CMP;GGA;ITH;MPIC	ACAM;Bi;BRB;CPGD;CCDB;DPR;Di;EPRSS;GIP;LT;Mem;Met;Or;SP
Bub1b	11.9773	11.0852	8.64202	8.34926	8.37823	6.2339	2.3335e-11	C1	Negative	P60	PTSKA	Bi;BCA;CPGD;CCDB;Di;GIP;LT;Met
Sgsm1	8.97153	11.0385	12.4742	12.2995	11.8765	11.6749	2.37313e-11	D	Positive	P1	GGA	BCA;CCDB
Nrp1	11.7806	11.1151	6.92633	7.94469	8.25643	5.50806	2.38754e-11	C1;J	Negative	P1;P60	PTSKA	ACAM;Bi;CPGD;CCDB;DPR;Di;EPRSS;IS;LT;Mem;Met;Or;SP
Stk32a	6.25953	8.22547	11.5239	11.6959	11.1683	11.2695	2.39254e-11	D;U	Positive	P1;P60	PTSKA	Bi;BCA;Met
Ankrd33b	1.96896	6.01242	10.4641	10.5902	9.88647	10.4508	2.39957e-11	D	Positive	P1	Unclassified	Bi;GIP
Grhl2	11.3155	10.4649	5.13753	6.34391	6.91108	0.333333	2.453e-11	C1	Negative	P60	Unclassified	BCA;CPGD;CCDB;DPR;GIP
Enho	3.93161	8.40037	10.386	10.6281	10.6406	10.885	2.46436e-11	D	Positive	P1	Unclassified	CCDB
Zfp36l1	11.6426	10.9538	6.02686	7.62428	8.07689	3.52832	2.4761e-11	C1	Negative	P60	Unclassified	Bi;BRB;BCA;CCDB;DPR;GIP;IS;Met
Sdc1	11.6047	10.6169	6.85751	7.77177	7.76337	4.9076	2.54433e-11	C1	Negative	P60	CMP;OOMA;OMPFAA	ACAM;Bi;BCA;CCDB;DPR;Di;EPRSS;LT;Mem;Met;Or
Rest	11.4285	10.564	6.05789	6.52249	7.0781	3.7011	2.55905e-11	C1	Negative	P60	ITH;MPIC;VTSC	Bi;BCA;CPGD;CCDB;DPR;Di;EPRSS;GIP;LT;Met
Fkbp1b	4.16278	6.5119	10.65	11.1257	11.2726	10.9197	2.58465e-11	D;U	Positive	P1;P60	GGPMTC;ITH;MPIC;VTSC	ACAM;Bi;BRB;BCA;CPGD;CCDB;DPR;EPRSS;IS;LT;Mem;Met;SP
Aldh1a1	11.3235	9.90683	4.28755	7.10043	8.14888	2.60245	2.58488e-11	C1	Negative	P60	OOMA;OMPFAA	Bi;BRB;BCA;CCDB;DPR;EPRSS;Met;Or
Pappa2	4.27763	10.2576	11.5886	11.0535	8.59221	8.30586	2.64975e-11	L	Positive	P4	Unclassified	BCA
Rrm2	12.2675	11.1642	8.97813	9.40978	8.92104	7.75403	2.7204e-11	C1	Negative	P60	OOMA	Bi;BCA;CCDB;EPRSS;GIP;Met
Try5	9.53551	8.2884	8.56955	15.2679	15.358	9.59355	2.76039e-11	Predicted_contaminant
Msln	3.30629	5.00557	10.6044	11.4585	12.251	5.72573	2.87211e-11	Q	Positive	P12
Slc16a1	10.9977	9.58409	4.24659	5.56727	6.61182	0.333333	2.94474e-11	C1	Negative	P60	GGPMTC;ITH;VTSC	Bi;BRB;CCDB;EPRSS;LT;Mem;Met;Or
Inpp4a	9.07622	10.7257	12.5978	12.1632	12.1565	11.9683	3.04768e-11	D	Positive	P1	Unclassified	Bi;BCA;EPRSS;Met
Tox3	8.47504	12.4667	12.095	11.3034	10.9906	10.2955	3.07344e-11	E	Positive	P1	Unclassified	Bi
Nfib	12.125	11.5113	8.43527	8.87046	9.07857	3.34813	3.09861e-11	C1	Negative	P60	Unclassified	ACAM;BRB;CPGD;DPR;GIP;SP
Galr1	1.86	7.93	9.23	9.96	10.39	9.3	3.16981e-11	A;D	Positive	E15.5_Ngn3_Het;P1	GGA;ITH;VTSC	Bi;BRB;BCA;EPRSS;GIP;LT;Mem;SP
Atp2b2	2.83062	7.57469	10.1011	10.3725	9.92172	10.8277	3.19219e-11	D;U	Positive	P1;P60	CMP;ITH;MPIC	ACAM;Bi;BRB;CCDB;DPR;EPRSS;IS;LT;Mem;Met;Or;SP
Galk1	11.0813	9.8086	3.95846	6.27946	7.12146	0	3.25335e-11	C1	Negative	P60	Unclassified	Bi;BCA;CCDB;Mem;Met;Or
Serpini2	12.6333	11.3121	4.14086	10.1888	11.5243	2.65909	3.27515e-11	Predicted_contaminant
Mcm6	13.1582	12.421	9.44418	10.4874	10.2953	9.05316	3.29495e-11	C1	Negative	P60	Unclassified	Bi;BCA;CPGD;CCDB;GIP;Met
Acan	10.5657	9.79475	2.83062	3.74911	2.05664	0	3.31454e-11	C1	Negative	P60	Unclassified	ACAM;Bi;BCA;CCDB;DPR;Mem
Notch2	12.1671	11.9804	8.41699	8.49221	9.03571	5.73297	3.31809e-11	C1	Negative	P60	CMP;GGA;PTSKA;VTSC	Bi;CPGD;DPR;Di;EPRSS;GIP;IS;LT;Mem;SP
Fmn2	7.55416	9.14557	12.4002	11.4244	11.2557	11.189	3.46562e-11	D	Positive	P1	OOMA;VTSC	ACAM;Bi;CPGD;CCDB;DPR;EPRSS;GIP;LT;Mem;Met;Or
Pnliprp1	18.0022	16.7172	10.9688	16.8448	18.4127	8.21332	3.51605e-11	Predicted_contaminant
Smtnl2	11.3553	11.0606	5.43569	5.88159	6.56537	0.333333	3.53882e-11	C1	Negative	P60	Unclassified	Bi
Erbb3	12.0501	11.3487	8.98054	8.58985	8.56396	5.72728	3.66379e-11	C1	Negative	P60	ITH;PTSKA;VTSC	ACAM;Bi;BCA;CPGD;CCDB;DPR;Di;EPRSS;IS;LT;Mem;Met;Or
Pex5l	3.6	9.34	10.05	10.26	9.94	10.15	3.75714e-11	A;D	Positive	E15.5_Ngn3_Het;P1	GGA;MPIC	Bi;CCDB;EPRSS;LT;Mem;Or;SP
Pfkfb2	9.98021	11.1539	13.3598	13.1683	12.7275	12.8434	3.78798e-11	D	Positive	P1	GGPMTC;OMPFAA;VTSC	Bi;BCA;CCDB;EPRSS;LT;Met
Cdh3	11.1183	10.7223	4.63161	5.10512	5.35994	0	3.91615e-11	C1	Negative	P60	CMP;IPS	ACAM;Bi;BRB;BCA;CPGD;CCDB;DPR;EPRSS;GIP;LT;Mem
Fam149a	11.8328	10.8567	7.85346	8.26669	8.50513	8.35298	4.14315e-11	J	Negative	P1
Hmga1	12.1445	11.1991	9.28363	8.96788	8.52111	8.01374	4.14895e-11	C1	Negative	P60	Unclassified	Bi;BRB;CPGD;EPRSS;GIP
St6galnac5	3.06	8.42	10.39	10.24	10.07	8.82	4.22328e-11	A;D	Positive	E15.5_Ngn3_Het;P1	Unclassified	BCA;Mem;Met;Or
H2-Q2	5.31359	8.08768	10.9157	11.3611	10.7483	11.0995	4.263e-11	D	Positive	P1	IPS;VTSC	ACAM;Bi;Di;IS;LT;Mem
Sema3f	11.6239	10.9055	7.87436	7.91784	7.64585	3.66761	4.38499e-11	C1	Negative	P60	Unclassified	ACAM;Bi;CCDB;DPR;EPRSS;Mem
Hkdc1	10.5836	9.50706	1.05664	4.57356	5.05026	0.333333	4.46194e-11	C1	Negative	P60	GGPMTC	Bi;BRB;BCA;CCDB;Met;SP
Cerkl	0.33	7.68	9.31	9.41	9.36	8.94	4.47184e-11	A;D	Positive	E15.5_Ngn3_Het;P1	GGA	BCA;CPGD;CCDB;EPRSS;Met
Gprin1	5.57	9.54	11.04	10.98	10.73	10.23	4.61477e-11	A;D;O	Positive	E15.5_Ngn3_Het;P1;P12	Unclassified	Bi;CCDB;DPR;Mem;SP
Ggt1	11.1835	9.88248	3.86911	6.98188	8.34074	0.528321	4.66818e-11	A1;C1	Negative	P60	OOMA;OMPFAA	BCA;DPR;EPRSS;Mem;Met
Spock1	2.70976	7.06348	10.2948	10.75	9.37349	10.1136	4.70964e-11	D	Positive	P1	CMP	ACAM;Bi;BCA;CCDB;DPR;EPRSS;Met
Mcm7	12.6691	11.816	9.58959	9.79767	9.57389	8.86038	4.77101e-11	C1	Negative	P60	Unclassified	Bi;BCA;CPGD;CCDB;EPRSS;GIP;Mem;Met
6430548M08Rik	6.74958	8.86711	11.3167	11.2585	10.9013	12.3049	4.79344e-11	U	Positive	P60
Nes	11.2845	10.1335	5.47341	7.18103	7.93405	3.07225	5.19209e-11	C1	Negative	P60	Unclassified	Bi;BCA;CPGD;CCDB;DPR;Or
Lrrc16b	8.39475	10.6829	12.1032	11.4351	11.7247	11.1247	5.30963e-11	D	Positive	P1	Unclassified	CCDB
Prkar1b	8.2	10.67	11.78	11.38	11.38	11.8	5.4094e-11	A;D;U	Positive	E15.5_Ngn3_Het;P1;P60	GGA;IPS;PTSKA	Bi;BRB;BCA;CCDB;DPR;Di;EPRSS;IS;LT;Mem;Met;SP
Tubb3	4.69	10.79	10.52	10.17	9.28	10.33	5.47883e-11	A	Positive	E15.5_Ngn3_Het	GGA	ACAM;Bi;BCA;CPGD;CCDB;GIP;Or;SP
Rasd1	7.04803	9.41764	11.4966	11.8273	10.8032	10.8679	5.49326e-11	D;K	Positive	P1;P4	GGA	Bi;BCA;CCDB;EPRSS;GIP;LT;Mem
Hk2	10.7043	9.9475	2.99243	4.36656	4.91494	0.528321	5.50567e-11	C1	Negative	P60	GGPMTC;OOMA	Bi;BRB;BCA;CPGD;CCDB;EPRSS;LT;Mem;Met;SP
Vgf	0.666667	7.25987	10.2138	9.56745	7.3487	10.9527	5.5205e-11	D;U	Positive	P1;P60	GGPMTC;IPS	Bi;BRB;DPR;LT
Fgfrl1	11.4381	10.9433	7.08154	7.42326	7.03858	1.86165	5.69278e-11	C1	Negative	P60	PTSKA	Bi;CPGD;DPR;EPRSS;Mem
Slc1a5	11.5953	10.233	7.19824	7.8931	9.01942	6.49939	5.70082e-11	C1	Negative	P60	ITH	CCDB;LT;Mem
Ptprt	5.24659	8.38713	10.6679	11.406	11.0173	9.62749	5.95078e-11	D;O	Positive	P1;P12	Unclassified	ACAM;Bi;BCA;EPRSS;Mem;Met
Cgnl1	11.7951	11.3663	7.57457	8.31755	8.64181	4.79173	6.03741e-11	C1	Negative	P60	Unclassified	ACAM;BCA;CCDB;Met
Fam171b	3.96012	7.25819	10.3866	10.4786	9.9528	11.9003	6.12564e-11	U	Positive	P60	Unclassified	Mem
Ky	4.35894	7.57722	10.1498	10.9573	11.0767	10.0018	6.22487e-11	D	Positive	P1	Unclassified	CCDB;DPR
Slc16a9	3.8	8.59	10.61	10.11	10.39	8.96	6.25862e-11	A;D	Positive	E15.5_Ngn3_Het;P1	Unclassified	LT;Mem;Met
Gm14681	12.6972	11.7508	10.2914	9.44019	9.43004	9.31734	6.26839e-11	N	Negative	P4
Mcf2l	9.42	11.74	12.48	12.18	12.03	11.69	6.37032e-11	A;D;O	Positive	E15.5_Ngn3_Het;P1;P12	GGA;PTSKA	ACAM;Bi;BCA;CPGD;CCDB;EPRSS;GIP;Mem
Grin3a	11.16	11.4348	4.91231	4.88391	4.44994	4.36951	6.37382e-11	C1;J;T;Z	Negative	P1;P12;P60	ITH	ACAM;Bi;CCDB;DPR;EPRSS;LT;Mem;SP
Chrnb2	5.49	9.24	10.62	10.8	10.71	11.15	6.40357e-11	A;D;U	Positive	E15.5_Ngn3_Het;P1;P60	ITH;MPIC;OOMA;VTSC	ACAM;Bi;BRB;CPGD;CCDB;DPR;EPRSS;IS;LT;Mem;Met;SP
Kctd12b	6.98998	10.2125	11.6167	11.45	11.0048	9.13867	6.44689e-11	D	Positive	P1	Unclassified	Bi;EPRSS
Ripply3	4	8.56	9.99	10.57	10.48	9.83	6.46972e-11	A;D	Positive	E15.5_Ngn3_Het;P1	Unclassified	Bi;BCA;DPR;GIP
Mpzl2	10.7319	9.73538	2.78143	5.32311	5.82177	0.666667	6.47501e-11	C1	Negative	P60	Unclassified	Bi;IS;Mem
Tiam1	11.6433	10.6677	8.04075	7.69405	7.55643	8.90019	6.47806e-11	J;T	Negative	P1;P12	Unclassified	Bi;CPGD;EPRSS;Mem
Clca2	9.87721	8.15455	1	2.49728	2.10731	0.333333	6.52099e-11	C1;J	Negative	P1;P60	ITH;MPIC	Bi;CPGD;EPRSS;LT;Mem
Gcgr	2.70976	6.91435	10.1258	10.4539	10.0753	9.06124	6.54876e-11	D	Positive	P1	GGPMTC;GGA;PTSKA;VTSC	Bi;BRB;EPRSS;LT;Mem;Met;Or
Itgb4	11.446	10.3792	6.83205	7.82605	8.54352	2.11328	6.67307e-11	C1	Negative	P60	GGA;IPS	ACAM;Bi;CCDB;Di;EPRSS;Mem;Met;Or
Cfi	10.7153	9.81624	4.34898	4.47341	4.90773	0.861654	6.7256e-11	C1	Negative	P60	VTSC	Bi;BCA;CCDB;EPRSS;GIP;IS;LT;Mem;Met;Or
Espn	10.5066	9.02622	2.70976	4.7504	5.36202	1.19499	6.73086e-11	C1	Negative	P60	Unclassified	ACAM;Bi;CCDB;Or;SP
Fam163a	3.25	10	10	9.45	9.37	8.97	6.97188e-11	A	Positive	E15.5_Ngn3_Het	Unclassified	Mem
Wnt4	5.34412	8.02382	10.0153	10.5107	11.6141	11.7359	7.05609e-11	D;O;P;U	Positive	P1;P12;P60	GGA	ACAM;Bi;BCA;CPGD;CCDB;DPR;EPRSS;GIP;LT;Met;Or;SP
Serpinh1	12.6846	12.4226	9.8939	9.73587	9.63752	7.01763	7.3148e-11	C1	Negative	P60	Unclassified	Bi;BCA;CCDB;DPR;EPRSS;GIP;Met;Or
Marcksl1	12.398	12.7684	10.2257	9.33109	7.97291	5.93718	7.32546e-11	C1	Negative	P60	Unclassified	Bi;CPGD;Mem;Or
Ccna2	12.5304	11.6261	9.94812	9.76681	9.56889	7.26225	7.36764e-11	C1	Negative	P60	GGA;PTSKA	Bi;BRB;CPGD;CCDB;DPR;Di;EPRSS;GIP
Ffar3	0	6.87	9.57	9.46	9.04	8.56	7.38164e-11	A;D	Positive	E15.5_Ngn3_Het;P1	GGA;MPIC;OMPFAA;PTSKA	Bi;BRB;EPRSS;Mem;SP
Rai2	4.20475	9.2962	10.0997	10.0703	10.3129	10.1107	7.38567e-11	D	Positive	P1	Unclassified	Bi
Tspan7	10.8845	13.0878	14.4542	13.4894	12.9156	13.2268	7.47747e-11	D	Positive	P1	Unclassified	Mem
Cpb1	10.1363	9.02373	8.44024	14.9732	16.6567	8.67647	7.66922e-11	Predicted_contaminant
Galnt14	2.3023	5.55794	9.54234	10.0926	10.4844	10.3434	7.92874e-11	D;U	Positive	P1;P60	Unclassified	Bi;BCA;Mem;Met
Clps	14.5364	13.0368	8.06521	14.1661	15.3669	7.86077	8.1008e-11	Singleton	Negative	P60
Smo	11.5854	11.0778	7.91856	7.84948	7.88148	4.21529	8.25414e-11	C1	Negative	P60	GGA	ACAM;Bi;BRB;CPGD;CCDB;DPR;Di;EPRSS;GIP;LT;Mem;Or;SP
Nadk2	11.7077	10.6957	8.40351	8.3097	8.14606	8.16144	8.32937e-11	C1;J	Negative	P1;P60	Unclassified	Bi;BCA;CCDB;Met
Tm4sf4	9.95693	11.3819	13.1588	12.5931	12.6295	12.707	8.39258e-11	D	Positive	P1	Unclassified	DPR;Mem
Wdtc1	13.3869	12.1042	10.7447	10.4673	10.5346	10.04	8.63083e-11	C1;J	Negative	P1;P60	IPS;OMPFAA	Bi;BRB;BCA;CPGD;CCDB;DPR;EPRSS;GIP;Met
Ush1c	7.28	10.29	11.14	11.32	11.11	10.86	8.67916e-11	A;D;O	Positive	E15.5_Ngn3_Het;P1;P12	Unclassified	ACAM;Bi;BRB;CPGD;CCDB;DPR;Mem;SP
Fermt1	11.1858	10.3688	5.98156	6.77555	7.02906	3.8026	8.90634e-11	C1	Negative	P60	Unclassified	ACAM;CPGD;CCDB;Mem
Pabpc1l2b-ps	3.08026	6.71928	9.82348	10.2142	10.222	10.4716	8.90913e-11	D	Positive	P1
Rps6ka6	11.4461	10.6211	7.95534	7.54152	7.16968	6.15512	8.95362e-11	C1	Negative	P60	CMP;GGA;PTSKA	ACAM;Bi;BCA;CPGD;DPR;EPRSS;GIP;LT;Met
Ttll7	8.92	11.1	11.86	11.87	11.77	11.77	9.1098e-11	A;D;U	Positive	E15.5_Ngn3_Het;P1;P60	Unclassified	BCA;CCDB;DPR;Met;SP
Aatk	5.47683	9.85088	11.1142	10.7277	10.5627	8.44849	9.14049e-11	D;O	Positive	P1;P12	GGA;PTSKA	Bi;BRB;BCA;CPGD;CCDB;DPR;EPRSS;LT;Met;Or;SP
Ascl1	9.98801	7.83688	3.87645	3.28392	2.60245	0	9.19932e-11	C1	Negative	P60	Unclassified	ACAM;Bi;CPGD;DPR;EPRSS;GIP;SP
Gpr125	12.0976	11.3601	9.23214	8.9592	8.98328	7.77567	9.25094e-11	C1	Negative	P60	GGA	Bi;EPRSS;Mem
Plk1	11.7505	10.7697	8.83165	8.49178	8.39152	6.33979	9.29623e-11	C1	Negative	P60	PTSKA	Bi;BCA;CPGD;CCDB;DPR;EPRSS;GIP;LT;Met;Or
Abca5	8.51712	9.55417	11.8379	11.7207	11.9879	12.092	9.34892e-11	D;U	Positive	P1;P60	Unclassified	Bi;BCA;DPR;LT;Mem;Or
Rps2-ps13	13.1428	12.3304	10.6174	8.9423	10.6875	10.5573	9.37952e-11	N	Negative	P4
Peg10	9.02333	15.3851	12.1434	8.99293	6.57393	5.73179	9.42011e-11	Singleton	Positive	E15.5_Ngn3_Het
Mab21l3	10.1692	8.70814	1.38998	3.74891	4.78877	0	9.51811e-11	C1	Negative	P60
C2cd4b	4.63688	8.44051	10.6529	10.3422	10.1349	10.8907	9.84723e-11	D	Positive	P1
Tinag	10.2493	8.75234	0.333333	4.43307	5.59827	0	9.861e-11	C1	Negative	P60	Unclassified	BCA;Mem
Smoc2	10.4436	9.09212	4.10373	4.99988	4.3023	0.333333	9.92262e-11	C1	Negative	P60	CMP	ACAM;Bi;CCDB;EPRSS;Mem
Tmem65	9.56994	10.5204	12.9145	12.52	12.0973	12.7424	1.00024e-10	D	Positive	P1	Unclassified	CCDB;Mem
Cdca7	11.054	10.1242	5.62079	6.72757	6.55102	3.29827	1.01464e-10	C1	Negative	P60	Unclassified	BCA;CPGD;CCDB;GIP
Cdkn1c	11.3906	11.1057	7.9698	6.79221	6.26315	3.27126	1.03223e-10	C1	Negative	P60	PTSKA	Bi;BCA;CPGD;CCDB;DPR;EPRSS;GIP;Met
Mcm3	12.2522	11.4697	8.83908	9.85643	9.39842	7.61739	1.035e-10	C1	Negative	P60	Unclassified	Bi;BCA;CPGD;CCDB;GIP;Met
Igdcc4	11.2633	10.3548	6.78232	7.19912	7.35488	4.97159	1.03809e-10	C1	Negative	P60	Unclassified	Bi;Mem
Aacs	9.25813	10.9757	12.525	12.4813	12.0061	10.7097	1.04362e-10	D	Positive	P1	IPS	Bi;BCA;CCDB;DPR;EPRSS;LT;Met
Cacna1c	5.13	8.86	10.7	10.63	10.71	9.83	1.05502e-10	A;D;O	Positive	E15.5_Ngn3_Het;P1;P12	CMP;GGPMTC;GGA;IPS;ITH;MPIC;VTSC	ACAM;Bi;BRB;CPGD;Di;EPRSS;LT;Mem;Met;SP
Hspa12a	6.00111	8.31045	10.7394	11.2016	11.2006	10.777	1.0565e-10	D	Positive	P1	Unclassified	Bi;Or
Atp6v0e2	7.80791	9.98024	11.4273	11.0761	11.5317	11.6442	1.05844e-10	D	Positive	P1	IPS;ITH;OOMA;VTSC	BCA;DPR;Di;EPRSS;IS;LT;Mem;Met;Or
Dmxl2	9.41658	11.2817	12.3535	12.1028	12.1032	12.1004	1.06696e-10	D	Positive	P1	GGA	ACAM;Bi;CCDB;Mem
Dnah8	3.97642	4.82722	10.0879	10.2638	11.338	11.5957	1.07259e-10	D;F;U	Positive	P1;P60	Unclassified	Bi;BCA;CCDB
Kcnj5	2.81707	7.17284	8.82425	9.6074	10.9768	9.9933	1.08213e-10	D	Positive	P1	GGA;ITH;MPIC	Bi;EPRSS;LT;Mem
Rasgrf1	3.91326	7.41023	10.443	10.6365	10.5306	8.75305	1.08218e-10	D;O	Positive	P1;P12	CMP;GGA;ITH	ACAM;Bi;BRB;BCA;CCDB;DPR;EPRSS;GIP;LT;SP
Kcnb1	3.1	7.27	9.93	9.89	10.31	9.52	1.08877e-10	A;D	Positive	E15.5_Ngn3_Het;P1	ITH;MPIC	Bi;CCDB;EPRSS;LT;Mem;SP
Id3	10.8711	9.53836	5.6821	6.31538	6.06345	3.34079	1.09431e-10	C1	Negative	P60	PTSKA	Bi;CPGD;CCDB;DPR;EPRSS;GIP
B3gnt3	2.16395	6.48721	9.97392	9.70004	9.89698	9.01771	1.11986e-10	D	Positive	P1	Unclassified	BCA;Mem;Met;Or
Ptprk	11.8957	11.5771	8.41725	8.43069	8.95682	6.57105	1.13617e-10	C1;T	Negative	P12;P60	PTSKA	ACAM;Bi;BCA;CPGD;CCDB;DPR;EPRSS;GIP;LT;Mem;Met;SP
Abcb9	6.99	10.29	11.11	11.25	10.72	10.66	1.14847e-10	A;D	Positive	E15.5_Ngn3_Het;P1	Unclassified	Bi;BCA;LT;Mem;Or
Pip5k1b	6.39799	8.53832	11.2258	11.1923	10.8431	11.1565	1.14902e-10	D;U	Positive	P1;P60	VTSC	Bi;BCA;CCDB;EPRSS;LT;Mem;Met
Npdc1	8.37413	10.6636	11.5777	11.4553	11.4014	11.7488	1.15026e-10	D	Positive	P1	Unclassified	Mem
Ctsc	11.3177	11.5135	5.24382	6.39054	7.48272	3.41913	1.1562e-10	C1	Negative	P60	Unclassified	Bi;BCA;CPGD;CCDB;DPR;IS;Met;Or
Grin2c	2.81707	10.8506	9.09814	9.18975	9.24271	6.36224	1.16505e-10	B	Positive	E15.5_Ngn3_Het
Mbnl3	10.8126	9.62794	5.25202	5.95407	5.98485	3.08026	1.20038e-10	C1	Negative	P60	Unclassified	Bi;DPR;GIP;Or
Slc25a13	11.2954	10.4175	7.00743	7.5025	7.60793	4.67006	1.20619e-10	C1	Negative	P60	CMP;ITH;OOMA	Bi;BCA;EPRSS;LT;Mem;Met
Tmem206	9.02078	10.8967	12.2958	11.8396	11.6441	11.7494	1.21645e-10	D	Positive	P1	Unclassified	Mem
Ldlrad3	11.7591	11.1715	8.18037	8.49653	8.87939	5.26656	1.22602e-10	C1	Negative	P60	VTSC	ACAM;Bi;LT;Mem
Sdpr	11.3327	10.0159	7.83875	8.15257	8.0613	2.95679	1.25282e-10	C1	Negative	P60	Unclassified	Bi;GIP;Mem;Or
Fhdc1	5.39891	8.09252	10.784	10.9407	10.8479	10.2662	1.25747e-10	D	Positive	P1
Mcm4	12.4529	11.799	9.02139	9.9514	9.63548	8.89655	1.27276e-10	C1;J	Negative	P1;P60	Unclassified	Bi;BCA;CPGD;CCDB;GIP;Mem;Met
Gabrb3	4.28032	9.11792	10.2538	9.68828	9.2753	11.588	1.27788e-10	D;U	Positive	P1;P60	ITH;MPIC	ACAM;CPGD;DPR;EPRSS;LT;Mem
Cdc20	11.9418	10.9733	9.20437	8.95411	8.97855	7.16032	1.31784e-10	C1	Negative	P60	PTSKA	Bi;BCA;CPGD;CCDB;DPR;Di;GIP;IS;Met
Syn1	2.96896	7.35776	9.57923	9.68418	9.84156	10.5497	1.31928e-10	D;U	Positive	P1;P60	CMP;VTSC	ACAM;Bi;BCA;CCDB;LT;Met;Or;SP
Onecut1	10.7042	9.82948	4.03802	5.2197	6.40489	0.773976	1.34248e-10	C1	Negative	P60	GGPMTC;IPS;PTSKA	ACAM;CCDB;DPR;Di;EPRSS;GIP;IS;Met;Or
Rgs16	4.05	9.51	9.71	10.64	9.59	8.65	1.34509e-10	A;D;O	Positive	E15.5_Ngn3_Het;P1;P12	GGA	BCA;CCDB;EPRSS;Mem
Plcxd3	1.86	8.33	9.84	9.33	8.97	7.35	1.35959e-10	A;D	Positive	E15.5_Ngn3_Het;P1	Unclassified	BCA;Met
Ehf	11.9239	11.2989	8.05078	8.63217	9.18061	8.87192	1.36572e-10	C1;J	Negative	P1;P60	Unclassified	BCA;DPR;GIP;Met
Cryba2	3.73608	10.3307	10.9423	9.46121	8.58004	7.09656	1.3798e-10	E	Positive	P1	Unclassified	Bi
Mboat1	11.0927	10.3366	6.29702	6.7057	6.69348	3.62806	1.39067e-10	C1	Negative	P60	Unclassified	BCA;Mem;Met;Or
Ttyh2	8.03654	10.2751	11.2365	11.5587	11.4658	11.1396	1.43465e-10	D	Positive	P1	ITH;MPIC	Bi;LT;Mem
Prss2	10.6383	8.94038	8.35691	15.1829	16.1775	9.44061	1.45606e-10	Predicted_contaminant
Bzw2	12.1024	11.4311	9.25754	9.20622	9.10843	7.72816	1.45986e-10	C1	Negative	P60	Unclassified	Bi;DPR;Mem
Fgfr2	12.2684	12.0588	10.4377	8.97439	8.43106	5.26865	1.49415e-10	C1	Negative	P60	GGA;IPS;ITH;PTSKA;VTSC	ACAM;Bi;BRB;BCA;CPGD;CCDB;DPR;Di;EPRSS;GIP;IS;LT;Mem;Met;Or
Rhbdf1	11.5223	10.3958	7.85688	8.52802	8.65563	5.3066	1.49461e-10	C1	Negative	P60	VTSC	ACAM;BCA;CPGD;EPRSS;LT;Mem;Met;Or
Cntnap4	9.53887	7.97083	1.19499	1.86165	1.26912	0	1.49741e-10	C1;J;T	Negative	P1;P12;P60	Unclassified	ACAM;Bi;BRB;Mem;SP
Kcnip1	2.79744	6.3732	9.77302	9.83904	9.48505	11.0568	1.50064e-10	D;U	Positive	P1;P60	CMP;ITH;MPIC	Bi;BRB;CCDB;EPRSS;LT;Mem;SP
Col6a6	4.65963	6.91716	11.021	10.8126	10.6674	9.11849	1.5132e-10	D	Positive	P1	Unclassified	ACAM;CCDB
Plxnd1	11.7018	10.9246	7.94645	8.75915	9.07691	4.49854	1.56088e-10	C1	Negative	P60	Unclassified	ACAM;Bi;CCDB;DPR;EPRSS;Mem
Ptk7	12.0141	11.6991	9.39441	9.0284	8.55946	4.57462	1.56642e-10	C1	Negative	P60	PTSKA	ACAM;Bi;BCA;CCDB;DPR;EPRSS;Mem;Met
Trim67	1.60245	8.03293	10.0279	9.76085	7.91365	7.54165	1.57909e-10	D	Positive	P1	GGA	Bi;BRB;CCDB;DPR;EPRSS;Met
Ctrb1	18.0461	16.3318	11.0018	17.4465	17.8518	10.5582	1.5939e-10	Predicted_contaminant
Cerk	7.29401	8.52664	11.0579	11.4399	11.4161	11.5694	1.62443e-10	D;U	Positive	P1;P60	GGA	Bi;BCA;CCDB;EPRSS;GIP;Mem;Met
Acaa2	12.1381	11.1564	9.0757	9.52827	9.38842	8.47816	1.64145e-10	C1;J	Negative	P1;P60	OOMA;OMPFAA	Bi;BCA;CPGD;CCDB;EPRSS;GIP;LT;Mem;Met;Or
Pclo	11.1947	12.9482	14.2002	13.9763	13.9246	12.8722	1.65468e-10	D;O	Positive	P1;P12	CMP;VTSC	ACAM;Bi;BRB;BCA;EPRSS;LT;Met;Or
Ggh	11.4906	10.6235	7.01468	7.26353	8.98496	7.99499	1.72148e-10	J	Negative	P1	OMPFAA	EPRSS;Met
Xkr7	2	8.21761	9.65007	9.25951	8.72885	8.40082	1.73765e-10	D	Positive	P1	Unclassified	Mem
Reg1	9.79744	7.86729	7.01055	13.4903	15.938	6.82538	1.75132e-10	R	Positive	P12
Grb10	15.0712	15.0666	12.9746	12.2399	11.1939	9.41996	1.76968e-10	C1	Negative	P60	GGPMTC;IPS	Bi;BCA;EPRSS
Mif	11.886	10.7344	9.15159	8.90301	8.80721	8.76907	1.77365e-10	C1;J;T	Negative	P1;P12;P60	ITH;OMPFAA;VTSC	ACAM;Bi;BRB;BCA;CPGD;CCDB;DPR;EPRSS;IS;LT;Met;Or
Rprm	10.2385	9.14475	4.17875	4.50061	3.58161	0	1.77555e-10	C1	Negative	P60	Unclassified	CPGD;CCDB;EPRSS;Mem
Adrbk2	9.81	11.57	12.68	12.48	12.37	11.7	1.85021e-10	A;D	Positive	E15.5_Ngn3_Het;P1	GGA;PTSKA;VTSC	Bi;BCA;EPRSS;LT;Met
Galm	10.7944	10.1203	5.20705	5.85448	5.58161	2.70976	1.85213e-10	C1	Negative	P60	GGPMTC	Bi;BCA;CCDB;Met;Or
Lyz2	11.0363	11.2547	3.18486	5.16769	7.3413	4.61965	1.85535e-10	J	Negative	P1	Unclassified	BCA;Met
Arhgef26	10.6603	9.40403	4.703	5.68252	6.6005	2.39989	1.86788e-10	C1	Negative	P60	GGA	Bi;BCA;CCDB;DPR
Ugt2b34	12.2088	11.4984	9.67361	9.40695	8.81231	8.91898	1.86898e-10	C1;J;T	Negative	P1;P12;P60	OMPFAA	BCA;Di;Met
Usp35	5.54038	8.97673	10.3965	10.7258	10.4786	10.7016	1.902e-10	D;U	Positive	P1;P60	Unclassified	BCA;Met
Pah	11.2385	10.3002	5.66758	7.456	9.09997	0.861654	1.96435e-10	C1	Negative	P60	OOMA	Bi;BCA;Met;Or
Tspyl4	7.05281	9.59483	10.6522	10.8996	11.1069	11.8349	1.98734e-10	D;U	Positive	P1;P60	Unclassified	CCDB;GIP
Fzd2	10.4947	9.71973	4.69227	4.55924	5.19487	0	2.00014e-10	C1	Negative	P60	CMP;GGA	ACAM;Bi;CCDB;DPR;Di;EPRSS;GIP;Mem;SP
Jakmip1	2.90475	6.58903	9.26744	9.67199	10.3022	10.1038	2.01719e-10	D	Positive	P1	Unclassified	Bi;CCDB;GIP;LT;Mem
Smc2	12.2572	11.4513	9.58018	9.6268	9.46207	8.06859	2.04301e-10	C1	Negative	P60	Unclassified	Bi;CPGD;CCDB;GIP;Or
Lamc1	13.9993	13.9665	11.5755	11.1659	10.8746	9.02391	2.05862e-10	C1	Negative	P60	IPS	ACAM;Bi;CCDB;DPR;Di;EPRSS;Mem;Or
Zg16	5.64688	4.26045	5.88832	11.675	13.6799	6.80421	2.06134e-10	Predicted_contaminant
Gpsm1	8.4857	10.3014	11.4872	11.4566	11.8193	11.4288	2.06261e-10	D;O	Positive	P1;P12	GGA	Bi;BRB;BCA;CCDB;DPR;EPRSS;GIP;LT;Mem;Or
Rnf182	1.63563	2.3023	8.86585	9.88928	11.0262	9.64525	2.09016e-10	D;F;O;P	Positive	P1;P12	Unclassified	Bi;BCA;CCDB;IS;Mem;Met
Acot1	11.1317	10.6568	6.65516	7.1683	6.40254	4.01045	2.1038e-10	C1	Negative	P60	OMPFAA	BCA;CCDB;Met
Shmt2	12.0206	10.9393	9.21802	8.98803	9.25806	9.17905	2.10495e-10	C1;J;N;T	Negative	P1;P12;P4;P60	OMPFAA	Bi;BCA;CPGD;CCDB;Mem;Met;Or
Hells	11.6362	10.7545	7.93274	9.07513	8.41968	7.59773	2.13455e-10	C1;J;T	Negative	P1;P12;P60	Unclassified	Bi;BCA;CPGD;CCDB;DPR;GIP;Met
C1qbp	12.094	11.2571	9.29571	9.00763	9.22749	9.24848	2.21388e-10	C1;J;N	Negative	P1;P4;P60	Unclassified	ACAM;Bi;BRB;CPGD;CCDB;DPR;Di;EPRSS;GIP;IS;Mem;Met
Fam210b	8.47061	9.08445	10.9689	11.9587	12.3628	11.7858	2.21514e-10	O	Positive	P12
Cldn6	12.1868	12.3984	9.72508	9.36519	8.52637	6.95318	2.23288e-10	C1	Negative	P60	Unclassified	ACAM;Bi;CCDB;Di;IS;Mem
Igsf3	11.3345	10.8701	7.81177	7.72478	7.56913	3.22414	2.23704e-10	C1	Negative	P60	Unclassified	Bi;DPR;Mem
Cldn3	12.0724	11.2535	8.43121	9.20859	9.55013	9.48211	2.23739e-10	J	Negative	P1	OOMA	CCDB;EPRSS;Mem
Stat3	10.1974	11.7799	13.2642	12.5373	12.6653	12.3611	2.26901e-10	D	Positive	P1	GGPMTC;GGA;PTSKA	ACAM;Bi;BRB;BCA;CPGD;CCDB;DPR;Di;EPRSS;GIP;IS;LT;Mem;Met;Or
Mmp24	1.53	7.42	9.36	9.33	8.95	7.83	2.28357e-10	A;D	Positive	E15.5_Ngn3_Het;P1	CMP	Bi;BCA;CCDB;Mem;Met;Or
Kcnk9	0.528321	5.40489	11.3088	10.1357	7.64014	4.24377	2.29036e-10	E	Positive	P1
Spp1	13.4163	14.2972	9.95315	10.5398	11.4297	9.17769	2.32092e-10	C1;J	Negative	P1;P60	Unclassified	ACAM;Bi;BRB;CPGD;CCDB;DPR;EPRSS;IS;SP
Gsta3	10.621	10.4087	4.20705	4.47616	5.43933	0.333333	2.32637e-10	C1	Negative	P60	OOMA	Bi;BCA;CCDB;DPR;Di;Met
Tyms	11.5885	10.6398	8.25267	8.85049	8.40631	7.38567	2.39743e-10	C1;J	Negative	P1;P60	OMPFAA	Bi;BRB;BCA;CCDB;DPR;EPRSS;GIP;Mem;Met
Adamts16	11.081	11.5161	5.61907	6.69448	6.94919	0.333333	2.43871e-10	C1	Negative	P60	Unclassified	Bi;BCA;CCDB;DPR;Met
Rnf43	10.8744	9.79091	5.89437	6.07961	7.28073	4.0959	2.44635e-10	C1	Negative	P60	GGA	Bi;BCA;CPGD;EPRSS;GIP;Mem;Met
Myb	10.3337	8.9283	4.09974	4.86679	6.01574	0.333333	2.44762e-10	C1	Negative	P60	IPS;ITH	Bi;BRB;CPGD;DPR;Di;EPRSS;GIP;IS;LT;Met;Or
Cd200	7.21969	10.1604	10.6204	11.2467	10.3504	11.8966	2.49051e-10	U	Positive	P60
Lyar	11.5259	10.5494	8.28304	8.17144	8.51415	8.01964	2.5088e-10	C1	Negative	P60	Unclassified	Bi;GIP
Cdk1	11.8364	11.023	9.10235	8.95753	8.89907	7.3422	2.52839e-10	C1	Negative	P60	GGA;IPS;OOMA;PTSKA	ACAM;Bi;BCA;CPGD;CCDB;DPR;Di;EPRSS;GIP;IS;LT;Mem;Met;Or
Camk1d	11.3465	10.2163	7.77802	8.04528	8.13358	7.56601	2.55638e-10	C1;J;N	Negative	P1;P4;P60	CMP;PTSKA	ACAM;Bi;BCA;CPGD;DPR;EPRSS;GIP;IS;LT;Met
Ptgfrn	11.5298	11.207	8.13112	8.24276	8.23347	4.09282	2.56967e-10	C1	Negative	P60	Unclassified	Bi;CCDB;Mem;Or
Ube2c	11.5266	10.6092	8.88551	8.12106	8.28688	6.40105	2.61156e-10	C1	Negative	P60	PTSKA	Bi;BRB;BCA;CPGD;CCDB;EPRSS;GIP;Met
Gm16551	10.6643	10.095	4.26724	5.81349	6.26092	0	2.63979e-10	C1	Negative	P60
Maneal	2.49728	7.32885	9.44317	9.34605	9.1486	9.71543	2.67048e-10	D	Positive	P1	Unclassified	BCA;Mem;Met
Ttc28	9.55096	10.8232	12.4505	12.1793	12.1947	12.1229	2.68751e-10	D	Positive	P1	Unclassified	Bi;CPGD;CCDB;Or
Th	2.93	7.77	9.55	10.06	9.23	8.44	2.71136e-10	A;D;U	Positive	E15.5_Ngn3_Het;P1;P60	GGPMTC;OOMA;OMPFAA;VTSC	ACAM;Bi;BRB;BCA;CCDB;DPR;EPRSS;GIP;LT;Mem;Met;Or;SP
Gfra1	10.8258	9.59947	5.51426	6.36362	6.8887	5.75126	2.7599e-10	C1;J	Negative	P1;P60	PTSKA	EPRSS;Mem;Or
Npm1	14.1309	13.4677	11.8031	11.1237	10.9149	10.8127	2.77152e-10	C1;J;N;T	Negative	P1;P12;P4;P60	Unclassified	Bi;BRB;BCA;CPGD;CCDB;DPR;EPRSS;GIP;LT;Met
Ociad2	8.43972	9.90154	11.7758	11.3698	11.9572	10.7137	2.79722e-10	D;O	Positive	P1;P12	Unclassified	Mem;Or
Itga6	14.5789	13.3782	11.5454	11.7224	12.1962	11.0247	2.79906e-10	C1;J	Negative	P1;P60	Unclassified	ACAM;Bi;BCA;CPGD;CCDB;DPR;Di;EPRSS;GIP;Mem;Met
Apba1	4.81	8.74	9.89	10.07	10.23	10.64	2.84668e-10	A;D;U	Positive	E15.5_Ngn3_Het;P1;P60	ITH	ACAM;Bi;BRB;CPGD;CCDB;DPR;GIP;LT;Mem;Or
Rai14	10.8809	10.1245	6.08557	6.55236	6.73902	2.38998	2.8698e-10	C1	Negative	P60	VTSC	Bi;CCDB;GIP;LT;Mem
Myrf	12.9901	12.5037	10.4715	10.6025	10.2976	8.15161	2.91825e-10	C1	Negative	P60	Unclassified	BCA;DPR;GIP;Mem;Met
Cdh2	7.33608	9.25233	11.5228	11.1716	10.9848	10.5255	2.93239e-10	D;O	Positive	P1;P12	Unclassified	ACAM;Bi;CCDB;DPR;Di;EPRSS;Mem;Met;Or
Adarb1	6.88098	8.99198	11.2117	11.0407	11.0281	10.4012	2.98092e-10	D;O	Positive	P1;P12	Unclassified	ACAM;Bi;BRB;BCA;CPGD;GIP;Met
Afm	10.7506	9.94637	5.37513	5.36914	6.44237	4.70826	3.00966e-10	C1;J;N	Negative	P1;P4;P60	Unclassified	Bi;CCDB;LT;Or
Kirrel2	11.0263	10.684	6.37586	6.82332	6.57681	2.77995	3.02779e-10	C1	Negative	P60	Unclassified	ACAM;Bi;CCDB;Mem;Met
Clip3	6.46	10.45	11.03	10.58	10.18	9.73	3.06173e-10	A;D	Positive	E15.5_Ngn3_Het;P1	VTSC	Bi;BRB;BCA;CPGD;CCDB;DPR;LT;Mem;Met;Or
Reep5	14.1924	12.9331	11.0213	11.3896	11.6126	11.9899	3.07382e-10	J	Negative	P1	Unclassified	Or
Ifrd2	11.4966	10.2076	8.18768	8.62282	8.72644	7.99756	3.0842e-10	C1	Negative	P60	Unclassified	Bi;GIP
Klf6	13.0485	12.5914	10.0888	10.6313	9.14383	11.7806	3.0963e-10	T	Negative	P12
Zdhhc2	9.33278	10.3644	12.4684	12.0693	11.8796	12.0841	3.10213e-10	D;U	Positive	P1;P60	Unclassified	Bi;BCA;DPR;EPRSS;Mem;Or
Ctsf	8.27004	11.1902	11.8038	11.1737	10.7735	10.2506	3.10931e-10	L	Positive	P4	Unclassified	BCA
Slc35d3	3.31	8.49	9.07	9.85	9.5	9.05	3.11292e-10	A;D	Positive	E15.5_Ngn3_Het;P1	Unclassified	LT;Mem
Prps2	12.1506	11.4225	8.79786	9.39484	9.68765	9.35531	3.12989e-10	C1;J	Negative	P1;P60	Unclassified	Bi;BCA;DPR;Met;Or
Lig1	12.1781	11.3917	9.0939	9.95208	9.41435	8.51636	3.13955e-10	C1	Negative	P60	OOMA	Bi;BCA;CPGD;CCDB;EPRSS;GIP;Or
Amy2b	14.6467	13.7257	8.73867	13.7244	15.2264	8.53795	3.19915e-10	Predicted_contaminant
Syt4	1.3023	4.6416	8.07221	8.37629	9.98511	12.1052	3.20575e-10	U	Positive	P60	CMP;VTSC	ACAM;Bi;BRB;CCDB;LT;Mem;Or
Gpr119	0	7.93	9.05	8.13	7.82	8.81	3.21531e-10	A;D	Positive	E15.5_Ngn3_Het;P1	GGA;IPS	Bi;EPRSS;LT;Mem
Dek	12.5729	12.0456	9.64996	9.93736	9.85638	9.53252	3.22287e-10	C1;J	Negative	P1;P60	Unclassified	Bi;GIP
Sntb1	10.635	9.69793	4.41829	6.09927	6.95795	1.19499	3.22489e-10	C1	Negative	P60	Unclassified	ACAM;Bi;CCDB;Mem
Zfp516	10.8969	12.69	13.4867	13.5137	13.4285	12.6101	3.30776e-10	D	Positive	P1	Unclassified	BCA;GIP;Met
4922501L14Rik	0	5.97894	8.3504	9.28283	8.80917	9.05749	3.31197e-10	D	Positive	P1
Kcnk16	9.26027	11.5531	12.2869	12.1843	11.3422	10.4554	3.32964e-10	D;L	Positive	P1;P4	ITH	LT
Gstm3	9.56772	8.24994	2.52832	2.53824	2.16395	1.3023	3.3778e-10	C1	Negative	P60	OOMA	Bi;BCA;Di;EPRSS;Met
Fam198a	10.7177	10.1593	5.16991	6.37829	5.9768	1	3.38089e-10	C1	Negative	P60	Unclassified	CCDB
Gdnf	10.1817	10.2401	3.78475	4.2316	1.38998	0	3.38518e-10	C1;T	Negative	P12;P60	PTSKA	ACAM;Bi;BRB;CPGD;CCDB;DPR;EPRSS;GIP;SP
Tgm2	11.5906	11.3619	8.17214	8.50623	8.37164	5.56429	3.40857e-10	C1	Negative	P60	CMP;GGA;ITH;VTSC	ACAM;Bi;BRB;BCA;CPGD;CCDB;DPR;Di;EPRSS;LT;Mem;Met;Or;SP
Slfn9	11.7783	10.7378	8.46186	9.53078	9.22434	6.98139	3.40863e-10	C1	Negative	P60	Unclassified	Bi;GIP
Smco4	10.8526	9.71644	6.59834	6.60819	6.61837	5.00722	3.44323e-10	C1	Negative	P60	Unclassified	Mem
Lgals3bp	10.2512	11.3732	12.8436	12.8173	12.7834	13.0752	3.51965e-10	D;U	Positive	P1;P60	VTSC	ACAM;Bi;CCDB;EPRSS;LT;Mem;Or
Gart	12.3777	11.5204	9.69262	9.70736	9.74033	9.44856	3.54886e-10	C1;J	Negative	P1;P60	OMPFAA	Bi;BCA;DPR;EPRSS;Met;Or
Ubxn10	6.65201	9.07728	10.7779	11.066	11.0287	10.2029	3.55813e-10	D	Positive	P1	Unclassified	Bi
Cela2a	10.831	9.73381	8.97736	15.0871	16.6967	9.22845	3.56803e-10	Predicted_contaminant
Tle6	11.634	11.4665	8.15528	8.59731	8.49921	5.98	3.59302e-10	C1	Negative	P60	Unclassified	Bi;CCDB
Fmnl2	8.81172	10.3752	12.0581	11.7441	11.7656	10.4803	3.60008e-10	D	Positive	P1	Unclassified	Bi;CCDB;DPR
Mnx1	5.09	8.9	9.85	10.47	10.43	9.78	3.61049e-10	A;D	Positive	E15.5_Ngn3_Het;P1	IPS	ACAM;DPR;Di;GIP
Egfl6	9.49924	7.82117	2.97295	1.72331	3.05329	1	3.72808e-10	C1	Negative	P60	Unclassified	ACAM;Bi;DPR;Mem
Ifitm2	11.7155	11.0279	8.81539	8.89234	8.81546	7.19782	3.78928e-10	C1	Negative	P60	Unclassified	ACAM;IS;Mem
C630020P19Rik	0.67	7.69	8.61	8.33	8.44	8.89	3.82346e-10	A	Positive	E15.5_Ngn3_Het
Elavl4	4.32	8.62	9.44	10.21	9.75	9.98	3.89279e-10	A;U	Positive	E15.5_Ngn3_Het;P60	Unclassified	Bi;GIP
Amigo1	8.29	10.37	11.36	11.46	11.19	11.13	3.98495e-10	A;D	Positive	E15.5_Ngn3_Het;P1	Unclassified	ACAM;Bi;DPR;Mem
Cish	8.40976	8.17034	11.2795	11.2912	12.1028	12.7275	4.02375e-10	D;U	Positive	P1;P60	GGA;PTSKA	Bi;EPRSS;IS;Met
Zyx	11.5385	11.0512	8.57508	8.41316	8.24279	6.50705	4.07781e-10	C1	Negative	P60	Unclassified	ACAM;Bi;CCDB;EPRSS;GIP
Skp2	11.0392	10.2448	7.12659	7.29035	6.71447	6.02621	4.07834e-10	C1;J	Negative	P1;P60	Unclassified	Bi;BCA;CPGD;CCDB;Di;EPRSS;GIP;IS;Met
Galnt18	6.78657	8.69637	11.3621	11.0994	10.954	9.55225	4.08201e-10	D	Positive	P1	Unclassified	Bi;BCA;Mem;Met;Or
Obsl1	12.4783	11.7188	9.59367	10.0954	9.84454	9.45032	4.0933e-10	C1;J	Negative	P1;P60	Unclassified	Bi;CPGD;CCDB;DPR;LT;Or
Bmp1	10.0561	11.7212	13.0974	12.5906	12.2793	11.4508	4.09512e-10	D	Positive	P1	CMP	Bi;BCA;CCDB;DPR;Or
D8Ertd82e	10.9126	10.1108	6.58517	6.89353	7.18033	2.99243	4.10196e-10	C1	Negative	P60	PTSKA	Bi;BCA;Met
Ybx3	12.8193	11.868	10.2805	10.2546	10.29	9.77142	4.11069e-10	C1;J	Negative	P1;P60	Unclassified	ACAM;Bi;BRB;CPGD;DPR;EPRSS;GIP
Stbd1	10.9769	9.91363	7.44253	7.25088	6.89775	4.94522	4.13639e-10	C1	Negative	P60	Unclassified	Bi;Mem
Dram1	10.4767	9.11015	4.78987	5.7386	6.9699	1.86165	4.19052e-10	C1	Negative	P60	Unclassified	CPGD;Mem;Met
Gsta4	10.1472	9.03756	2.80313	5.80351	4.99803	0.528321	4.28729e-10	C1	Negative	P60	Unclassified	Bi;BCA;CCDB;Di;Met
Serpinb1a	11.004	9.87067	7.06569	7.84274	7.9574	1.83062	4.28835e-10	C1	Negative	P60	Unclassified	BCA;CCDB;Di
Rps26	12.6141	11.8181	10.0538	9.77158	10.0915	9.89662	4.33254e-10	J;N	Negative	P1;P4	Unclassified	CCDB;GIP
Cela1	13.69	12.2555	7.96902	12.4932	15.5635	9.17242	4.45133e-10	Predicted_contaminant
C130021I20Rik	0.53	9.58	8.74	8.41	7.35	5.49	4.54073e-10	A	Positive	E15.5_Ngn3_Het
Jph4	3.35894	8.40862	9.83798	9.94983	9.05566	7.25775	4.59006e-10	D;O	Positive	P1;P12	Unclassified	BRB;CCDB;LT;Mem;Or;SP
Slit3	10.455	9.06865	5.07144	6.0524	6.59186	1.72331	4.66027e-10	C1	Negative	P60	CMP	ACAM;Bi;CPGD;CCDB;DPR;EPRSS;GIP
Kl	3.40477	5.87611	10.7211	9.80262	8.96403	9.97535	4.66307e-10	D	Positive	P1	CMP;IPS;ITH;OOMA;PTSKA	Bi;BRB;BCA;DPR;Di;EPRSS;IS;LT;Mem;Met;Or
Neat1	8.92609	10.0651	11.4178	10.9419	11.964	13.7789	4.66747e-10	U	Positive	P60
Fev	1.19499	10.6191	9.12132	8.52325	7.03938	1.77398	4.68326e-10	B	Positive	E15.5_Ngn3_Het
Aldh7a1	12.3187	11.4607	9.59832	9.60334	9.87745	9.51423	4.69058e-10	C1;J	Negative	P1;P60	GGPMTC;OOMA;OMPFAA	Bi;BCA;CCDB;GIP;Met;Or
Shc2	6.25	10	10.43	10.43	10.57	10.05	4.70335e-10	A;D	Positive	E15.5_Ngn3_Het;P1	GGA;IPS;PTSKA	Bi;Di;EPRSS
E130309D14Rik	3.91857	7.68977	9.87772	9.64597	9.69924	9.93684	4.79099e-10	D	Positive	P1
Ncaph	11.4391	10.6241	8.59335	8.55899	8.27217	5.86602	4.87199e-10	C1	Negative	P60	Unclassified	Bi;CPGD;CCDB;GIP;Mem
Dio1	1.10731	4.45544	8.30049	8.88382	10.3076	9.17174	4.91291e-10	D;O;U	Positive	P1;P12;P60	OOMA	BCA;Mem;Met
Rasgrp3	10.7192	11.0084	4.87624	5.29217	6.00029	2.63563	4.94097e-10	C1	Negative	P60	CMP;GGA	Bi;BCA;CCDB;EPRSS;IS
Bhlhe41	3.24377	5.87371	9.33905	9.90535	10.0316	9.92183	4.94231e-10	D;U	Positive	P1;P60	Unclassified	Bi;BRB;CCDB;DPR;GIP
Skap1	2.49728	5.80595	8.66569	9.69083	9.96708	9.51117	4.94723e-10	D	Positive	P1	Unclassified	ACAM;Bi;CCDB;GIP;IS;Mem
Lhx1	0	9.03	8.28	7.93	7.66	7.61	4.96937e-10	A	Positive	E15.5_Ngn3_Het	Unclassified	ACAM;Bi;BCA;CPGD;CCDB;DPR;EPRSS;GIP
Gm20448	2.40961	7.41991	9.9948	8.94712	8.78824	7.87662	5.03466e-10	D	Positive	P1
Fam20a	3.69759	5.54553	9.78441	10.3055	9.92247	10.2619	5.0821e-10	D	Positive	P1	ITH	BRB;DPR;Or
P2ry1	6.43949	8.60911	12.2332	10.1906	9.83917	9.8893	5.0875e-10	D	Positive	P1	ITH	ACAM;BRB;BCA;LT;Met
Hmgn3	6.81	10.95	10.49	10.57	10.43	9.63	5.12137e-10	A	Positive	E15.5_Ngn3_Het	VTSC	ACAM;BRB;BCA;EPRSS;GIP;LT;Or
Jag1	10.9831	9.79716	7.48427	7.67185	7.30328	4.93584	5.12746e-10	C1	Negative	P60	CMP	Bi;CCDB;DPR;Di;EPRSS;GIP;IS;Mem;SP
C2cd4c	4.53578	9.0194	9.81709	9.81131	9.90981	9.16914	5.25741e-10	D	Positive	P1	Unclassified	Bi
Spdef	10.0037	8.43329	2.3023	5.17387	6.18931	0	5.32027e-10	C1	Negative	P60	Unclassified	BCA;CPGD;DPR;GIP;Met
Top2a	13.7317	12.9713	11.2983	11.3803	11.3235	9.20101	5.34791e-10	C1	Negative	P60	Unclassified	Bi;BRB;BCA;CPGD;CCDB;DPR;EPRSS;GIP
Ank	10.8119	12.2396	13.4656	13.5005	13.3724	12.1955	5.36209e-10	D	Positive	P1	Unclassified	Mem
Atf3	12.4907	12.2813	8.81806	10.9066	6.89578	12.1405	5.40201e-10	Singleton	Negative	P12
Gm15210	12.193	11.2749	9.77717	9.5781	9.39509	9.45928	5.41149e-10	C1	Negative	P60	Unclassified	Met
Selm	6.89213	9.68295	10.637	10.6623	10.6913	11.2262	5.4523e-10	D	Positive	P1	VTSC	CPGD;CCDB;DPR;EPRSS;GIP;LT;Met;Or
Fat2	9.90347	8.49833	1.86165	4.38092	6.03623	0	5.46914e-10	C1	Negative	P60	CMP	ACAM;Bi;CCDB;GIP;Mem;Or
Hn1	11.9678	11.5672	9.77927	9.13395	8.7295	7.84329	5.47968e-10	C1	Negative	P60	Unclassified	GIP
Slc4a1	9.79215	7.86656	4.07326	6.31061	1.63563	0.333333	5.52721e-10	Singleton	Negative	P60
Rbp4	9.41389	13.2277	12.5624	11.4225	10.7939	8.31743	5.53086e-10	B	Positive	E15.5_Ngn3_Het
Gpr142	0.86	7.69	9.25	8.24	8.17	7.39	5.6871e-10	A;D	Positive	E15.5_Ngn3_Het;P1	GGA	ACAM;CCDB;EPRSS;Mem
Acacb	10.6448	9.35347	5.03009	6.93809	7.84802	1.26912	5.70868e-10	C1	Negative	P60	GGPMTC;OMPFAA	Bi;BCA;CCDB;EPRSS;Met
Pa2g4	13.3815	12.6327	10.8899	10.7434	10.7169	10.4238	5.72435e-10	C1;J	Negative	P1;P60	Unclassified	BCA;GIP
Tpx2	12.0003	11.2674	9.78688	9.40417	9.17731	7.61893	5.75853e-10	C1	Negative	P60	Unclassified	Bi;BCA;CPGD;CCDB;GIP;SP
Sh2d4a	10.3241	9.18415	4.22942	5.24238	6.90636	0.528321	5.82843e-10	C1	Negative	P60	Unclassified	Bi;BCA;CCDB;GIP
Dtl	11.308	10.4275	7.72484	8.66144	8.19538	6.655	5.95464e-10	C1	Negative	P60	Unclassified	Bi;BCA;CPGD;CCDB;EPRSS;GIP;Mem;Met
Wdr86	10.1002	8.70274	2.23808	2.93578	4.15126	9.37686	6.26066e-10	I	Negative	P1
Eif1ax	12.2012	11.5161	9.60728	9.68315	9.57196	8.98668	6.315e-10	C1;N	Negative	P4;P60	Unclassified	GIP
Chrdl1	9.65651	8.71363	2.65909	3.64383	3.38662	0	6.33147e-10	C1	Negative	P60	PTSKA	Bi;CCDB;DPR;EPRSS
Sobp	5.33322	8.53	10.3448	10.4409	10.2216	9.5456	6.34581e-10	D;O	Positive	P1;P12	Unclassified	Bi;BRB;DPR;SP
Ppp4r1l-ps	9.56456	10.9087	12.3243	12.2143	12.1782	11.1468	6.37152e-10	D	Positive	P1
Ntn4	11.1919	10.8531	8.18269	7.66504	7.13576	4.1823	6.4302e-10	C1	Negative	P60	Unclassified	ACAM;Bi;CCDB;DPR;EPRSS;Mem
Nit2	11.2087	10.7313	8.00907	7.61953	7.38317	6.46301	6.44705e-10	C1;J	Negative	P1;P60	OMPFAA	BCA;CCDB;Met;Or
Prss8	11.3131	10.366	8.3559	8.16696	8.537	6.14404	6.50096e-10	C1	Negative	P60	Unclassified	Bi;BCA;CCDB;LT;Mem;Met;Or
Vps37a	9.88	11.95	12.2	12.19	12.06	11.94	6.52116e-10	A;D	Positive	E15.5_Ngn3_Het;P1	Unclassified	CCDB;GIP;LT;Mem;Met
Dhx34	12.3148	11.1108	9.57368	9.8326	10.2441	9.57741	6.52242e-10	C1;J	Negative	P1;P60	Unclassified	Bi;BCA;GIP;Mem;Met
Iffo1	6.47635	8.89039	10.6709	10.8075	10.6217	10.6183	6.54049e-10	D	Positive	P1
Dbi	11.5038	10.9211	8.172	8.41539	8.74595	7.98993	6.58712e-10	C1;J	Negative	P1;P60	Unclassified	Bi;CCDB;DPR;EPRSS;Met;Or
Hmga1-rs1	12.1807	11.1836	9.79311	9.7021	9.54859	9.26727	6.63775e-10	C1;J	Negative	P1;P60	Unclassified	Bi;BRB;CPGD;EPRSS;GIP
Ptpn14	11.7586	11.2237	10.1633	8.68572	8.44022	2.90475	6.67208e-10	B1;C1	Negative	P60	Unclassified	Bi;BRB;CCDB;DPR;GIP;Met
Tshz1	10.3694	11.5697	12.914	13.0322	12.9633	11.9074	6.7947e-10	D;O	Positive	P1;P12	Unclassified	Bi;BCA;DPR;GIP
Ass1	10.7163	9.58913	7.27507	6.82987	6.02564	4.07927	6.81118e-10	C1	Negative	P60	OMPFAA	Bi;BCA;CCDB;Met
Gm12141	12.551	11.594	10.0717	9.9036	9.83964	10.6123	6.85354e-10	T	Negative	P12
Gp2	5.76137	4.90796	4.85989	11.8598	13.2245	6.00499	6.90557e-10	Predicted_contaminant
Mrc1	9.88836	11.9882	3.18741	4.17875	4.27006	4.35559	6.922e-10	J	Negative	P1	VTSC	EPRSS;LT
Mal2	11.3424	10.6742	8.01308	8.12708	7.94759	8.46992	6.98744e-10	C1;J;T	Negative	P1;P12;P60	Unclassified	Bi;Mem;Or
Best3	0	5.4527	8.8661	8.93032	8.14758	8.77088	6.99389e-10	D	Positive	P1	ITH;MPIC	LT;Mem
Cel	14.0178	12.5315	9.69095	16.1826	17.7156	8.89508	7.00637e-10	Predicted_contaminant
Kif15	11.1746	10.3249	8.26013	7.97705	7.69228	5.67666	7.03894e-10	C1	Negative	P60	Unclassified	ACAM;Bi;BRB;BCA;CPGD;CCDB;DPR;Mem;Met
Dlgap3	5.84396	8.03416	10.488	10.918	10.5397	9.81274	7.11963e-10	D	Positive	P1	Unclassified	ACAM;Bi;Mem
Vtn	10.9356	9.49171	2.90475	7.26012	10.047	2.93793	7.15747e-10	Predicted_contaminant
Srrm3	1.72	7.73	8.3	8.53	8.71	8.87	7.16028e-10	A	Positive	E15.5_Ngn3_Het
Ttc23	10.7156	9.61689	6.30218	6.36735	6.67669	6.29572	7.20724e-10	C1	Negative	P60	Unclassified	Bi
Dsg2	13.008	12.3727	10.3595	10.4636	10.5874	10.0167	7.20796e-10	C1;J	Negative	P1;P60	CMP;MPIC	ACAM;Bi;CPGD;DPR;EPRSS;Mem;Or;SP
Rrm1	12.7768	12.1566	10.2645	10.4491	10.1559	9.49248	7.21161e-10	C1;J	Negative	P1;P60	OOMA	Bi;BCA;CPGD;CCDB;DPR;EPRSS;GIP;LT;Mem;Met;Or;SP
Nipal1	6.47712	8.20355	11.1824	10.2642	10.8606	10.7925	7.21692e-10	D;U	Positive	P1;P60	ITH	LT;Mem
Hspg2	12.6968	12.0294	9.70475	10.6985	11.0276	6.18368	7.25707e-10	C1	Negative	P60	Unclassified	ACAM;Bi;CCDB;DPR;Di;EPRSS;Mem;Or;SP
Rap1gap	13.6784	12.3209	10.613	11.4463	11.7511	10.7898	7.26294e-10	J	Negative	P1	Unclassified	Or
Tmem132b	5.35373	7.95849	10.178	10.0285	10.4502	10.8624	7.26548e-10	D	Positive	P1
Tgif1	10.6978	9.94941	5.50493	6.46621	6.678	5.08954	7.40478e-10	C1;J	Negative	P1;P60	PTSKA	Bi;CPGD;DPR;Di;EPRSS;GIP
Ezh2	11.6733	11.2153	8.90196	8.93039	8.732	7.4849	7.47171e-10	C1;J	Negative	P1;P60	GGA;OOMA;PTSKA	Bi;BRB;BCA;CPGD;CCDB;DPR;Di;EPRSS;GIP;LT
Dlk1	14.2667	13.9136	13.7062	13.2955	9.78515	4.85408	7.49411e-10	B1	Negative	P60
Ranbp1	12.2347	11.5527	9.8254	9.67554	9.53042	9.25647	7.67692e-10	C1;J	Negative	P1;P60	GGA	BCA;CPGD;CCDB;Di
Fras1	12.3823	11.6261	8.84324	10.184	10.6479	9.02016	7.67765e-10	C1;J	Negative	P1;P60	Unclassified	Bi;DPR;Mem
Rnf138rt1	0.33	7.6	8.27	8.62	8	7.61	7.69631e-10	A;D	Positive	E15.5_Ngn3_Het;P1	Unclassified	Bi
Alb	10.4045	8.83509	4.62863	5.25079	8.4372	0	7.75017e-10	C1	Negative	P60	CMP;VTSC	Bi;BRB;CPGD;CCDB;EPRSS;IS;LT;Mem;Or
Ksr2	6.761	9.28241	10.5781	10.9244	10.7552	10.3481	7.79902e-10	D	Positive	P1	CMP;PTSKA	Bi;BCA;CCDB;EPRSS;Mem;Met
Dmd	10.966	10.3124	7.28274	7.40079	7.49129	3.52075	7.84532e-10	C1	Negative	P60	CMP;ITH;MPIC;VTSC	ACAM;Bi;CCDB;DPR;Di;EPRSS;GIP;LT;Mem;Met;SP
Mex3a	11.3505	11.4642	8.20467	7.93252	7.33684	6.70758	7.89177e-10	C1	Negative	P60	Unclassified	Bi;GIP
Rab27b	10.4865	9.22291	4.81868	6.51982	7.66085	0.666667	7.97525e-10	C1	Negative	P60	VTSC	Bi;BCA;EPRSS;LT;Mem;Or
A330076H08Rik	4.29012	7.46334	9.2709	9.98342	9.6354	10.9689	8.00736e-10	U	Positive	P60
Slc12a2	12.0464	11.2502	9.89495	9.28184	9.29177	8.98745	8.02768e-10	C1;J;N;T	Negative	P1;P12;P4;P60	GGA;ITH	Bi;BRB;CPGD;DPR;EPRSS;LT;Mem;Or;SP
Mast1	4.33427	7.7724	10.0728	10.006	10.0249	8.17226	8.17064e-10	D	Positive	P1	PTSKA	Bi;BCA;CCDB;EPRSS;Mem;Met;Or
Atp7b	10.4091	9.33657	5.91172	5.67745	5.42941	4.4136	8.2124e-10	C1;J	Negative	P1;P60	ITH;MPIC;VTSC	Bi;BRB;BCA;CCDB;DPR;EPRSS;LT;Mem;Met;Or
A430105I19Rik	5.88452	8.52541	10.2992	10.2303	10.4753	10.9687	8.27736e-10	D	Positive	P1	Unclassified	GIP
Pdlim1	10.5483	9.44372	6.23664	6.37696	7.05715	0.861654	8.45565e-10	C1	Negative	P60	OOMA	Bi;BCA;CCDB;EPRSS;GIP
Tns1	11.6076	10.8807	7.94469	8.96681	9.83163	5.08013	8.5105e-10	C1	Negative	P60	Unclassified	ACAM;Bi;EPRSS;GIP
Nup62cl	9.62326	8.16999	2.16395	4.08076	4.23894	2.90475	8.56839e-10	C1;J	Negative	P1;P60	Unclassified	CCDB;GIP;Mem;Or
Gjb1	10.2219	8.97531	2.54795	6.03892	7.45522	0	8.64293e-10	A1;C1	Negative	P60	Unclassified	ACAM;Bi;LT;Mem;Or
Lrmp	10.5029	9.44253	3.8629	6.63233	7.86359	1.63563	8.69545e-10	C1	Negative	P60	Unclassified	LT;Mem;Or
Wfdc2	10.0444	9.51417	4.4084	3.98908	4.88391	0.333333	8.81433e-10	C1	Negative	P60	Unclassified	BCA;Or
Hopx	4.51208	7.13944	9.87681	9.85545	9.79649	10.8372	8.82028e-10	D;U	Positive	P1;P60	Unclassified	Bi;BRB;CPGD;CCDB;DPR;EPRSS;GIP;SP
Trpm5	5.98825	7.48776	10.8973	9.83666	11.0016	10.865	8.8214e-10	D;U	Positive	P1;P60	ITH;MPIC	LT;Mem
Slc4a8	7.31	10.1	10.76	11.04	10.67	10.18	8.8925e-10	A;D	Positive	E15.5_Ngn3_Het;P1	ITH	LT;Mem;SP
Dkc1	11.5774	10.7932	8.7464	8.65079	8.78089	8.79609	8.9812e-10	C1;J	Negative	P1;P60	Unclassified	Bi;BCA;CPGD;GIP
Gas5	12.6888	12.0544	10.2451	10.2315	10.055	9.91544	9.04731e-10	J	Negative	P1
Slco1a6	0.773976	3.93793	8.02043	9.48451	9.38095	8.75327	9.07268e-10	D;U	Positive	P1;P60	OMPFAA	Bi;BRB;DPR;LT;Mem;Met
Dlg4	7.78	10.3	11.09	11.04	10.65	10.74	9.22594e-10	A;D	Positive	E15.5_Ngn3_Het;P1	GGA;ITH;MPIC;VTSC	ACAM;Bi;BRB;CCDB;DPR;EPRSS;LT;Mem;Met;Or;SP
Prkca	8.46615	9.47976	11.4521	11.6216	11.3281	11.4183	9.24356e-10	D;K;O;U	Positive	P1;P12;P4;P60	CMP;GGPMTC;GGA;IPS;ITH;OOMA;PTSKA;VTSC	ACAM;Bi;BRB;BCA;CPGD;CCDB;DPR;Di;EPRSS;GIP;IS;LT;Mem;Met;Or;SP
D630036G22Rik	3.95909	8.50994	8.82845	9.29731	9.61412	10.0502	9.43129e-10	U	Positive	P60
Cdca8	11.2296	10.2912	8.41392	8.32633	8.16463	6.16741	9.4313e-10	C1	Negative	P60	Unclassified	Bi;CPGD;CCDB;GIP
Birc5	11.2489	10.4284	8.57245	8.27809	7.94927	6.16936	9.44601e-10	C1	Negative	P60	VTSC	Bi;BRB;BCA;CPGD;CCDB;Di;EPRSS;GIP;LT;Met
Miat	6.59767	13.6694	9.58838	8.40867	5.38691	0.333333	9.46023e-10	Singleton	Positive	E15.5_Ngn3_Het
Ccnb1	11.2378	10.4412	8.80345	8.1639	7.64342	6.19908	9.89842e-10	C1	Negative	P60	OOMA;PTSKA	Bi;BCA;CPGD;CCDB;DPR;EPRSS;GIP;Mem;Met;Or
Dctpp1	10.9271	9.76994	7.51975	7.43152	7.78949	6.0914	1.00558e-09	C1	Negative	P60	Unclassified	Bi;BCA;CCDB;Met
Btbd17	5.1	10.79	9.61	9.46	9.14	8.81	1.00578e-09	A	Positive	E15.5_Ngn3_Het
Sh3bgrl2	10.5358	9.63778	5.62179	6.3327	6.52807	4.20979	1.02297e-09	C1	Negative	P60	OOMA	Bi;BRB;BCA;GIP;Or
Pik3ap1	10.6787	9.97802	5.73409	6.73888	7.46605	2.44064	1.03576e-09	C1	Negative	P60	IPS	Bi;CCDB;EPRSS;IS;Mem
Srgap3	11.5782	11.1298	9.17523	9.14453	8.17672	5.59776	1.03969e-09	C1	Negative	P60	GGA	ACAM;Bi;EPRSS
Trim9	1.39	8.99	7.7	7.77	7.43	9.64	1.04469e-09	A;U	Positive	E15.5_Ngn3_Het;P60	Unclassified	Bi;BCA;LT;Met
Rps19	12.7238	11.975	10.6998	9.9325	10.349	9.65653	1.04757e-09	C1;J;N;T	Negative	P1;P12;P4;P60	Unclassified	Bi;BRB;CCDB;DPR;EPRSS;GIP;IS;Mem;Met;Or
2310015B20Rik	1.44064	6.38486	8.22295	8.5453	9.13997	8.70895	1.05167e-09	D	Positive	P1
Isyna1	12.3572	11.6468	10.1599	10.2472	9.61623	8.68458	1.07332e-09	C1	Negative	P60	Unclassified	BCA;CCDB;Met
Asphd1	1.33333	6.93963	8.4612	8.52237	8.39109	8.59657	1.07777e-09	D	Positive	P1	OOMA	BCA;Mem;Met
Gnaz	7.05	9.34	10.68	10.88	10.79	10.54	1.0834e-09	A;D	Positive	E15.5_Ngn3_Het;P1	GGA	Bi;BCA;CCDB;EPRSS;Or
Cpa3	8.90874	7.0113	1.56681	0.666667	3.1155	0	1.09991e-09	Predicted_contaminant
Zfp503	10.6268	9.33444	5.92606	6.2462	7.38963	6.68498	1.1151e-09	C1;J;N	Negative	P1;P4;P60	Unclassified	BCA;CPGD;GIP;Met
Lfng	10.4398	9.6476	4.29012	6.26093	7.56282	0.333333	1.13224e-09	C1	Negative	P60	Unclassified	Bi;BCA;CPGD;DPR;EPRSS;Mem
Col27a1	11.9396	11.9628	9.35453	9.60356	8.40131	8.50784	1.14091e-09	C1;T	Negative	P12;P60	Unclassified	ACAM;Bi;CCDB
Capn6	10.9125	10.7076	6.32919	7.30523	7.34499	3.55748	1.15972e-09	C1	Negative	P60	Unclassified	Bi;BCA;CPGD;CCDB;Met
Rps26-ps1	11.8773	11.0404	9.6474	9.10475	9.17342	9.2137	1.16333e-09	J;N	Negative	P1;P4	Unclassified	CCDB;GIP
Kcnb2	1	8.14	8.49	8.21	7.54	7.71	1.16338e-09	A;D	Positive	E15.5_Ngn3_Het;P1	ITH;MPIC	Bi;CCDB;LT;SP
Rcc2	13.2659	12.5885	10.7584	10.6983	10.9041	10.5129	1.19527e-09	C1;J	Negative	P1;P60	GGA	ACAM;Bi;BCA;CPGD;CCDB;DPR;EPRSS;GIP;LT
Mki67	14.5394	13.6583	12.4295	12.1662	12.0992	9.84326	1.20048e-09	C1	Negative	P60	Unclassified	Bi;CPGD;CCDB;DPR;EPRSS;GIP;Mem;Met
Fam92b	1.44	7.66	8.72	8.55	7.89	7.61	1.20192e-09	A	Positive	E15.5_Ngn3_Het
Epn3	10.245	9.43897	4.35894	5.61793	6.41354	1.72331	1.20687e-09	C1	Negative	P60	VTSC	Bi;CCDB;GIP;Mem;Or
Sh3pxd2a	10.8981	11.1097	13.707	13.8131	13.5399	12.8313	1.21273e-09	D	Positive	P1
Plxna1	11.8977	11.4608	9.21503	9.38249	9.29902	8.47525	1.21686e-09	C1;J	Negative	P1;P60	Unclassified	ACAM;Bi;DPR;EPRSS;GIP;LT;Mem;Or
Syn2	4.4084	7.96016	9.53905	9.73004	9.61677	9.91737	1.22162e-09	D	Positive	P1	VTSC	ACAM;Bi;BCA;LT;Mem;Met
Espl1	11.2507	10.241	8.57984	8.42977	8.53536	6.03581	1.23056e-09	C1	Negative	P60	Unclassified	Bi;BCA;CPGD;CCDB;GIP;Met
Pkd1	10.3752	11.4702	13.0556	12.939	12.6306	11.9177	1.23361e-09	D;O	Positive	P1;P12	ITH;MPIC	ACAM;Bi;BRB;BCA;CPGD;CCDB;DPR;EPRSS;GIP;LT;Mem;Met;Or
Bex1	11.5316	10.8119	9.06977	8.59845	8.46476	8.73778	1.24782e-09	C1;J;N	Negative	P1;P4;P60	Unclassified	Bi;CCDB;DPR;GIP
Filip1	4.6416	8.34284	10.0471	9.5248	9.48725	9.79392	1.24927e-09	D	Positive	P1
Apoe	11.7216	12.4315	7.19453	8.69085	10.1951	7.47069	1.25064e-09	C1;J	Negative	P1;P60	Unclassified	ACAM;Bi;BRB;BCA;CPGD;CCDB;DPR;Di;EPRSS;LT;Mem;Met;Or;SP
Gcat	12.6784	11.4137	10.2703	10.2801	10.6466	10.2154	1.25638e-09	C1;J	Negative	P1;P60	GGA;OMPFAA	Bi;BCA;EPRSS;Mem;Met
Kcnq1	11.4166	10.3912	8.97105	8.81093	8.97812	5.20262	1.25937e-09	C1	Negative	P60	IPS;ITH;MPIC	ACAM;Bi;BRB;CCDB;DPR;EPRSS;GIP;LT;Mem;Met;Or;SP
Ermap	8.93815	6.56105	3.80029	2.46411	1	0	1.26348e-09	C1	Negative	P60	Unclassified	Bi;Mem;Or
Prodh2	9.86787	9.77439	5.67385	3.91326	0.528321	0	1.28033e-09	Singleton	Negative	P12
Selenbp1	10.3992	9.31463	5.58219	6.14889	6.83461	2.80735	1.29034e-09	C1	Negative	P60	Unclassified	Bi;CCDB;DPR;GIP;LT;Mem
Asph	12.1269	11.795	9.6723	9.42126	9.15285	9.85663	1.2922e-09	C1;J;T	Negative	P1;P12;P60	ITH;OOMA	Bi;BCA;CCDB;DPR;EPRSS;GIP;LT;Mem;Met
Gpr137b-ps	6.73212	8.39088	10.4584	10.191	10.8149	11.9415	1.31493e-09	U	Positive	P60
Trim71	10.0129	9.12119	6.26609	4.88726	3.68825	0.333333	1.31577e-09	C1	Negative	P60	PTSKA	Bi;BCA;CPGD;DPR;Di;EPRSS;GIP;Met
Cdc14b	8.54435	11.0618	11.9382	10.7839	10.8237	10.2766	1.3167e-09	D	Positive	P1	Unclassified	BCA
Lrrn2	3.71573	8.24972	8.16664	8.97981	9.81609	10.1492	1.31699e-09	U	Positive	P60
Bicc1	13.1239	12.7877	10.7009	10.7822	10.5454	9.75801	1.31728e-09	C1	Negative	P60	Unclassified	Bi;CCDB;DPR;EPRSS;GIP
H2afx	12.0522	11.1323	9.87811	9.61488	9.63354	8.80648	1.3206e-09	C1	Negative	P60	Unclassified	Bi;CPGD;CCDB;DPR;GIP;IS
Gstm7	10.5495	9.26391	7.05969	6.66462	6.56058	4.09571	1.33482e-09	C1	Negative	P60	ITH;MPIC	Bi;BCA;Di;EPRSS;LT;Met;Or
Ndc1	11.3627	10.8889	8.40611	8.55929	8.3273	7.12591	1.3388e-09	C1	Negative	P60	Unclassified	CPGD;CCDB;DPR;GIP;LT;Mem
Tspan2	5.54	8.8	10.09	10.31	10.16	9.29	1.34525e-09	A;D;O	Positive	E15.5_Ngn3_Het;P1;P12	Unclassified	CCDB;DPR;EPRSS;Mem
Ppib	13.172	12.3562	10.787	10.6581	10.9857	10.1974	1.35061e-09	C1;J;T	Negative	P1;P12;P60	Unclassified	Bi;BRB;BCA;CPGD;DPR;GIP;Mem;Met;Or
Cela3b	11.2728	9.85899	8.1972	14.683	15.6648	8.29997	1.35227e-09	Predicted_contaminant
Tst	10.5068	9.3678	5.9241	6.01401	6.98837	5.54675	1.37226e-09	C1;J;N	Negative	P1;P4;P60	OMPFAA	BCA;CCDB;DPR;GIP;LT;Mem;Met;Or
Zfpm1	11.7604	11.2169	9.23937	9.43194	9.1968	6.65247	1.37243e-09	C1	Negative	P60	Unclassified	Bi;BRB;CCDB;DPR;EPRSS;GIP;IS;Met
Noxa1	9.59835	8.40521	1.38998	4.83881	5.16695	0	1.39275e-09	C1	Negative	P60	GGA;OOMA	Bi;BRB;BCA;CCDB;Met
Rbms3	11.4501	11.6816	8.98418	8.59896	8.05348	3.45544	1.3941e-09	B1;C1	Negative	P60	Unclassified	CCDB;GIP
Kif22	11.1474	10.2325	8.44105	8.13444	8.15806	6.20443	1.39532e-09	C1	Negative	P60	Unclassified	ACAM;Bi;BRB;BCA;CPGD;CCDB;DPR;GIP
Wnk3	6.89424	11.5778	10.9893	10.3599	8.99387	7.99423	1.39771e-09	E	Positive	P1	Unclassified	BRB;CCDB
Thop1	11.6266	10.6672	8.96745	8.94393	9.05313	9.20183	1.40203e-09	C1;J;T	Negative	P1;P12;P60	Unclassified	Bi;BCA;CCDB;EPRSS;Met
Map9	8.07	10.78	11.17	11.02	10.6	10.3	1.42155e-09	A;D	Positive	E15.5_Ngn3_Het;P1	Unclassified	CPGD;CCDB;GIP;Or
Rragd	5.12653	7.31844	10.189	9.92115	9.95789	10.799	1.42492e-09	D;U	Positive	P1;P60	Unclassified	Bi;EPRSS;Or
Csf1r	10.2054	11.4888	3.34813	5.00094	6.18281	3.84896	1.43601e-09	C1;J;Z	Negative	P1;P60	Unclassified	ACAM;Bi;BRB;BCA;DPR;EPRSS;GIP;IS;LT;Mem;Met;SP
Ppp2r5b	7.43	10.55	10.81	10.67	10.34	10.43	1.43609e-09	A;D	Positive	E15.5_Ngn3_Het;P1	Unclassified	ACAM;Bi;BRB;BCA;CPGD;CCDB;DPR;EPRSS;GIP;Met
Rtn2	4.35	8.64	9.62	9.59	9.19	9.12	1.43854e-09	A;D	Positive	E15.5_Ngn3_Het;P1	Unclassified	Bi;BRB;LT;Mem
Nkx6-1	11.32	13.01	13.57	13.6	13.3	13.87	1.46548e-09	A;D;U	Positive	E15.5_Ngn3_Het;P1;P60	IPS	Bi;BCA;CPGD;CCDB;DPR;Di;EPRSS;GIP;LT;Or
Vim	12.2222	12.7969	9.74372	9.93247	9.95312	4.05476	1.47398e-09	C1	Negative	P60	Unclassified	Bi;CPGD;CCDB;DPR;SP
Map2k3	11.561	10.4474	8.82152	9.16802	9.07322	8.81646	1.51345e-09	C1;J;N	Negative	P1;P4;P60	PTSKA	Bi;BRB;BCA;Di;EPRSS;GIP;IS;Mem;Met
Cep170	8.77336	10.8963	11.7418	11.3493	10.8936	10.7889	1.51737e-09	D	Positive	P1	Unclassified	CCDB;Mem
Rps8	12.3303	11.6999	10.1721	9.66383	9.87101	9.59295	1.52781e-09	C1;J;N	Negative	P1;P4;P60	Unclassified	CCDB;GIP;Mem;Met;Or
Ankrd55	1	6.04635	8.62968	8.76971	8.11563	8.10496	1.53698e-09	D	Positive	P1	Unclassified	Bi
Kcnj11	7.95	10.34	11.18	10.95	10.69	10.55	1.55338e-09	A;D	Positive	E15.5_Ngn3_Het;P1	GGPMTC;IPS;ITH;MPIC	ACAM;Bi;CCDB;Di;EPRSS;GIP;LT;Mem;Met;Or;SP
Mageh1	8.69	10.43	11.19	11.53	11.21	11.33	1.56039e-09	A	Positive	E15.5_Ngn3_Het	Unclassified	CCDB
Rims2	6.41	9.55	10.54	10.53	10.02	9.96	1.59753e-09	A;D	Positive	E15.5_Ngn3_Het;P1	GGA;IPS;MPIC;VTSC	ACAM;Bi;CCDB;EPRSS;LT;Mem;SP
Svop	2.65909	7.71634	8.99136	8.97364	8.45362	7.93999	1.59934e-09	D	Positive	P1	ITH	ACAM;LT;Mem
Slc6a17	4.96481	8.10513	9.40602	10.2077	8.91572	11.4995	1.59957e-09	U	Positive	P60	Unclassified	LT;Mem
Cdo1	10.5112	9.75394	5.03082	6.05141	6.69503	6.53427	1.61399e-09	J	Negative	P1	OOMA;OMPFAA	Bi;BCA;DPR;EPRSS;Met
Gjb2	10.0451	8.66909	3.38662	6.03272	7.04232	0.528321	1.64341e-09	A1;C1	Negative	P60	Unclassified	ACAM;Bi;CCDB;DPR;EPRSS;LT;Mem;SP
Ncapg	11.1292	10.206	8.27394	8.35978	8.0812	6.7057	1.64873e-09	C1	Negative	P60	Unclassified	Bi;CPGD;CCDB;GIP;Mem
Tcof1	11.7437	10.8369	9.20305	9.30824	9.34758	8.80531	1.65715e-09	C1;J	Negative	P1;P60	Unclassified	Bi;GIP
Suox	6.9358	9.32553	10.43	10.5768	10.5921	11.0422	1.67122e-09	D;U	Positive	P1;P60	OOMA	Bi;BCA;CCDB;Mem;Met
Rab3a	7.68338	9.54234	10.396	10.9321	10.862	11.8735	1.68334e-09	D;U	Positive	P1;P60	VTSC	ACAM;Bi;BRB;BCA;CCDB;DPR;EPRSS;GIP;LT;Mem;Met;Or;SP
Synpr	3.44327	7.41771	9.01646	8.50655	8.74706	11.1556	1.69738e-09	D;U	Positive	P1;P60	Unclassified	ACAM;Mem
Mpo	8.40201	6.23844	0	0	0	0	1.69906e-09	C1;J	Negative	P1;P60	OOMA;VTSC	Bi;BRB;BCA;CPGD;CCDB;DPR;EPRSS;GIP;Met;Or
Kcnk5	10.1442	9.36074	4.3023	5.77149	6.27814	1.10731	1.70063e-09	C1	Negative	P60	ITH;MPIC	LT;Mem;SP
B3galnt1	7.12314	7.80374	10.8125	10.7301	10.8901	11.6713	1.71014e-09	D;U	Positive	P1;P60	Unclassified	BCA;Mem;Met;Or
Fxyd6	8.29634	10.411	11.465	11.5144	11.2624	7.53566	1.73256e-09	E	Positive	P1
Abhd15	5.44	9.23	10.16	9.96	9.84	8.86	1.74081e-09	A;D	Positive	E15.5_Ngn3_Het;P1	Unclassified	BCA;CCDB;Mem;Met
Kif11	11.7096	11.0217	9.42003	9.32566	9.20178	7.07626	1.74718e-09	C1	Negative	P60	Unclassified	ACAM;Bi;BRB;BCA;CPGD;CCDB;DPR;Mem;Met
Hspd1	13.7857	13.0906	11.3669	11.204	11.0531	11.7083	1.76035e-09	C1;J;T	Negative	P1;P12;P60	PTSKA;VTSC	ACAM;Bi;CPGD;CCDB;EPRSS;GIP;IS;LT;Mem;Met;Or
Vamp2	10.155	11.351	12.3251	12.3797	12.4567	12.658	1.77666e-09	D;U	Positive	P1;P60	CMP;GGPMTC;IPS;VTSC	ACAM;Bi;BRB;CCDB;EPRSS;LT;Mem;Or;SP
Pax6os1	0	6.23539	8.49829	8.0017	8.0147	8.10538	1.78703e-09	D	Positive	P1
Cth	10.1668	8.77168	5.23862	4.71906	6.4841	5.80012	1.8012e-09	C1;J;N	Negative	P1;P4;P60	CMP;OMPFAA	Bi;BCA;CCDB;EPRSS;GIP;Met;Or
AU020206	9.43856	7.77868	2.83062	4.34056	4.85247	0.666667	1.81347e-09	C1	Negative	P60
Lmo4	10.5502	9.69312	5.82427	6.49185	6.97716	5.52926	1.81495e-09	C1;J	Negative	P1;P60	Unclassified	BRB;CCDB;DPR;GIP;IS
A830039N20Rik	0	5.90849	8.33486	8.30893	8.10911	8.07724	1.81963e-09	D	Positive	P1
Kcnj12	1.19499	1.86165	8.43244	9.44617	9.57751	8.29474	1.82173e-09	D;F;O	Positive	P1;P12	ITH;MPIC	ACAM;CCDB;LT;Mem;SP
Htra2	11.2407	10.2853	8.40416	8.30088	8.67577	7.92703	1.84821e-09	C1;J	Negative	P1;P60	Unclassified	Bi;BRB;BCA;CPGD;CCDB;DPR;Di;EPRSS;GIP;Mem;Met
Klhl7	10.01	12.13	12.22	12.15	11.82	11.81	1.86439e-09	A	Positive	E15.5_Ngn3_Het	Unclassified	Bi;CCDB;GIP;Met;Or
Ttc39b	8.14612	9.91125	10.5869	10.8868	11.4511	11.4811	1.89714e-09	O	Positive	P12
Cdca7l	10.6048	9.80139	6.57884	7.31977	6.93574	2.70976	1.91216e-09	C1	Negative	P60	Unclassified	Bi;CPGD;CCDB;GIP
D5Ertd579e	10.2224	11.1954	12.913	12.3978	12.3815	12.3836	1.93364e-09	D	Positive	P1
Smpdl3b	8.82885	7.52295	0	0.935785	3.46411	0	1.93625e-09	C1;J	Negative	P1;P60	Unclassified	BCA;CCDB;Met;Or
Hmgcs2	10.6401	9.77717	4.75295	8.16545	8.12171	0.333333	1.93643e-09	C1	Negative	P60	Unclassified	BCA;CCDB;Mem;Met
Mrpl12	11.3641	10.4663	8.53868	8.59218	8.68634	8.79072	1.94514e-09	C1;J;N	Negative	P1;P4;P60	Unclassified	Bi;CCDB;GIP
Mcm2	12.4103	11.6049	9.52589	10.7435	10.1525	9.39799	1.94823e-09	C1;J	Negative	P1;P60	Unclassified	Bi;BCA;CPGD;CCDB;EPRSS;GIP;Met
B630019K06Rik	6.89376	9.90235	10.9826	10.2337	9.89236	10.5811	1.96901e-09	D	Positive	P1
Gpm6b	10.6509	10.4106	6.1157	6.83752	6.98239	2.05664	1.98754e-09	C1	Negative	P60	ITH	ACAM;CCDB;EPRSS;LT;Mem;SP
Zbtb7c	3.87157	8.00068	9.77458	9.41983	9.48424	6.55679	2.00877e-09	D	Positive	P1	Unclassified	Bi
Aurkb	11.0494	10.084	8.04716	8.36744	8.21285	5.90211	2.024e-09	C1;T	Negative	P12;P60	PTSKA	Bi;BCA;CPGD;CCDB;DPR;EPRSS;GIP;LT;Met
Ric3	5.44158	8.80146	10.0561	9.68	9.91613	10.0337	2.03075e-09	D	Positive	P1	ITH	ACAM;Bi;BRB;CCDB;Mem;Met
Hapln4	1.33333	3.30975	7.29216	8.35978	9.22747	11.8106	2.03406e-09	U	Positive	P60	Unclassified	ACAM;Bi
2510009E07Rik	7.84322	9.85587	10.8704	11.0519	10.8525	10.7192	2.03644e-09	D	Positive	P1
Ect2	11.5593	10.7075	9.2945	9.24109	8.93669	7.27276	2.03848e-09	C1	Negative	P60	CMP;GGA;OOMA	ACAM;Bi;BCA;CPGD;CCDB;DPR;EPRSS;GIP;LT;Mem
Dctd	10.1063	9.18955	5.93747	5.2038	5.63863	1.66667	2.06511e-09	C1	Negative	P60	Unclassified	Bi;BCA;Met;Or
Nod1	7.13	10.09	10.55	10.53	10.66	9.84	2.09888e-09	A;D;O	Positive	E15.5_Ngn3_Het;P1;P12	Unclassified	Bi;BCA;CPGD;CCDB;EPRSS;GIP;Mem;Met
Prkacb	11.156	11.7477	13.7894	13.633	13.2938	13.9222	2.10096e-09	D;K;U	Positive	P1;P4;P60	CMP;GGPMTC;GGA;IPS;PTSKA	ACAM;Bi;BRB;BCA;CPGD;CCDB;DPR;Di;EPRSS;IS;LT;Mem;Met;Or
Pim2	8.42778	11.8014	11.6002	10.7825	9.87362	9.91997	2.10443e-09	B	Positive	E15.5_Ngn3_Het
Sept5	6.42916	8.69303	10.3909	10.5748	10.4035	10.3568	2.11274e-09	D	Positive	P1	VTSC	ACAM;Bi;CCDB;LT;Mem;Or
Dcbld1	11.0739	10.6405	8.34892	7.81715	7.70109	5.48695	2.11319e-09	C1	Negative	P60	Unclassified	Mem
Fbxl2	5.25706	8.49875	10.114	9.8558	9.53389	9.98149	2.13041e-09	D	Positive	P1	CMP	Bi;BCA;Mem;Met
Rhbdl3	3.54	8.38	9.3	9.2	8.71	7.69	2.13162e-09	A;D;O	Positive	E15.5_Ngn3_Het;P1;P12	CMP	Bi;BCA;Mem;Met
Fbln1	10.4388	9.4055	7.08401	6.43782	6.66648	2	2.13721e-09	C1	Negative	P60	CMP	Bi;BCA;CCDB;DPR;Mem;Met;Or
Tnfaip8	11.0341	10.247	7.98418	8.26236	8.04986	5.6801	2.14067e-09	C1	Negative	P60	Unclassified	BCA;CPGD;CCDB;EPRSS
Hcn4	3.5026	6.6655	9.54768	9.4032	9.22302	8.47515	2.16882e-09	D	Positive	P1	ITH;MPIC	ACAM;Bi;DPR;EPRSS;LT;Mem;SP
Ocrl	10.25	12.7	12.58	12.4	11.67	11.55	2.17955e-09	A	Positive	E15.5_Ngn3_Het	Unclassified	ACAM;Bi;BRB;BCA;CCDB;EPRSS;Met;Or
Mcm10	10.8333	9.79751	7.44123	7.89806	7.47717	6.35258	2.18372e-09	C1	Negative	P60	Unclassified	Bi;CPGD;GIP
Hhip	8.93638	6.95008	1.52832	3.00746	3.91072	0	2.18845e-09	C1	Negative	P60	OOMA	Bi;BCA;CPGD;CCDB;DPR;Di;EPRSS;Mem;Met
Socs2	5.51866	5.54397	10.0229	10.2158	10.5419	11.6731	2.19984e-09	U	Positive	P60	PTSKA	Bi;BRB;DPR;EPRSS;IS;Met
Thbs1	11.0066	10.6433	6.74635	7.92439	8.00284	6.60328	2.20758e-09	C1;J	Negative	P1;P60	CMP;ITH;OOMA;PTSKA;VTSC	ACAM;Bi;BRB;BCA;CPGD;CCDB;DPR;Di;EPRSS;GIP;IS;LT;Mem;Met;Or
Klf9	5.34839	5.93601	9.89316	10.0657	10.8812	10.6504	2.30417e-09	D;F;U	Positive	P1;P60	Unclassified	Bi;CCDB;DPR;EPRSS;GIP;Mem
Cenpe	11.6652	10.9358	9.87936	9.15359	8.91371	7.13954	2.33097e-09	C1	Negative	P60	Unclassified	ACAM;Bi;BRB;BCA;CPGD;CCDB;DPR;GIP;Mem;Met
Mgat3	7.49	10.24	10.69	10.95	10.47	9.86	2.33683e-09	A;D	Positive	E15.5_Ngn3_Het;P1	Unclassified	BCA;Mem;Met
Gm5771	9.1313	7.8381	6.50221	13.3599	13.1245	4.20414	2.38778e-09	Predicted_contaminant
Car2	9.62564	7.50886	4.29726	5.5667	5.39191	0.528321	2.39802e-09	C1	Negative	P60	GGA;ITH;OOMA	Bi;BRB;CCDB;DPR;EPRSS;IS;LT;Mem;Met;Or;SP
Tmsb15b2	2.86	8.64	9.08	8.51	8.46	6.35	2.41823e-09	A	Positive	E15.5_Ngn3_Het	Unclassified	CCDB
Ptprr	3.57541	6.63511	9.11007	9.70378	8.88693	9.48495	2.42021e-09	D;U	Positive	P1;P60	Unclassified	Bi;BCA;CCDB;DPR;GIP;Mem;Met
Rgs4	3.23808	8.87694	8.01419	7.81214	7.8475	11.5319	2.42164e-09	W	Positive	P60
Wfdc15b	9.39875	8.6492	3.89257	2.61725	4.13291	0	2.43889e-09	C1	Negative	P60	Unclassified	BCA;EPRSS
Sv2a	8.8024	9.55262	11.5313	11.4176	11.5418	11.6104	2.45543e-09	D;U	Positive	P1;P60	ITH	ACAM;Bi;BRB;EPRSS;LT;Mem;Or;SP
Unc79	7.14108	9.06968	10.39	10.8275	10.5054	11.2361	2.46124e-09	D	Positive	P1	MPIC	BRB;CPGD;EPRSS;LT;Mem
Zfp395	12.619	11.8379	10.1798	10.5602	10.6529	9.28344	2.50095e-09	C1	Negative	P60	Unclassified	Bi;CCDB;GIP
Plagl1	11.9493	11.3421	10.4459	9.52569	9.19626	7.22899	2.53618e-09	C1	Negative	P60	Unclassified	Bi;CCDB;DPR;GIP
AI836003	0.33	6.41	7.98	8.68	7.87	7.09	2.55523e-09	A	Positive	E15.5_Ngn3_Het	Unclassified	CCDB
Lmx1b	4.0858	9.60653	9.74323	9.22429	8.44084	6.06347	2.64234e-09	B;L	Positive	E15.5_Ngn3_Het;P4	Unclassified	BRB;DPR;Met
Rnd3	10.6062	10.3495	6.30437	6.87508	6.15235	4.66328	2.64464e-09	C1	Negative	P60	GGA	Bi;EPRSS;LT;Mem;Or
Sncb	0	3.99988	8.43898	8.50732	8.03582	8.81084	2.67702e-09	D;U	Positive	P1;P60	CMP	ACAM;Bi;CPGD;CCDB;GIP;Met;Or;SP
Vwa5b1	3.62806	7.89739	9.56022	9.26832	9.37139	5.90597	2.68252e-09	E	Positive	P1
Kcnq4	3.97	8.83	9.54	8.91	8.43	8.69	2.69842e-09	A;D	Positive	E15.5_Ngn3_Het;P1	ITH;MPIC	ACAM;DPR;LT;Mem;SP
Hmmr	11.5575	10.6718	9.66338	9.07207	8.94189	7.48963	2.69864e-09	C1	Negative	P60	Unclassified	ACAM;BRB;CCDB;DPR;Di;EPRSS;Mem;Met
Tmsb4x	13.0288	13.4658	9.88187	10.3264	11.3991	10.3732	2.70976e-09	J;N;Z	Negative	P1;P4;P60	Unclassified	ACAM;Bi;CCDB;DPR;Or
Epb4.1l3	10.2999	11.527	12.7801	12.5287	12.386	11.9452	2.71229e-09	D;O	Positive	P1;P12	Unclassified	ACAM;Bi;CPGD;CCDB;DPR;LT;Mem;Or;SP
F13a1	10.277	11.8803	5.78291	6.22509	5.45455	5.03581	2.71353e-09	C1;J	Negative	P1;P60	Unclassified	EPRSS;IS
Dcdc2a	11.7681	11.647	9.23794	9.22621	9.49071	6.47498	2.71683e-09	C1	Negative	P60	Unclassified	ACAM;DPR;EPRSS;SP
Odc1	12.6188	11.9521	10.4603	9.99009	10.2532	10.6069	2.73789e-09	C1;J;T	Negative	P1;P12;P60	OMPFAA	BCA;CPGD;CCDB;EPRSS;Met
Tmem54	8.73214	7.46915	0.528321	3.02561	1.58496	0	2.73989e-09	C1	Negative	P60	Unclassified	Mem
Ctbp2	11.5422	10.7073	9.07264	9.18982	9.03388	8.49748	2.81214e-09	C1;J	Negative	P1;P60	OOMA	ACAM;Bi;BCA;DPR;Di;EPRSS;GIP;Met
Plekha6	10.0931	11.3099	12.0712	12.3468	12.4552	12.1917	2.88883e-09	D	Positive	P1
Anxa2	10.9858	11.1868	7.74473	7.72141	7.73796	3.07144	2.89146e-09	C1	Negative	P60	CMP;GGA;VTSC	Bi;BRB;BCA;CPGD;CCDB;DPR;EPRSS;GIP;IS;LT;Mem;Met;Or;SP
D130043K22Rik	2.13077	6.05609	8.0404	8.67159	8.61762	9.56478	2.91814e-09	D;U	Positive	P1;P60	Unclassified	ACAM;CCDB;DPR;Mem;Or
Slc25a10	11.3981	10.4228	8.68197	9.24966	8.98455	7.84952	2.92006e-09	C1	Negative	P60	GGPMTC;ITH;OMPFAA	LT;Mem;Met
Kif19a	6.25	9.17	10.33	10.48	9.7	10.1	2.92212e-09	A;D;U	Positive	E15.5_Ngn3_Het;P1;P60	Unclassified	ACAM;Bi;BCA;CCDB;Met
Acly	13.112	14.4765	15.3963	15.6225	16.1563	15.5031	2.94756e-09	D;U	Positive	P1;P60	Unclassified	Bi;BCA;Met;Or
Nasp	12.3918	11.9984	10.3064	10.3494	9.87255	8.6928	2.97687e-09	C1	Negative	P60	Unclassified	Bi;CPGD;CCDB;DPR;GIP;LT
Ccr2	9.212	9.61427	0.935785	1.58496	4.20244	0	2.97767e-09	C1;J;Z	Negative	P1;P60	GGA;VTSC	ACAM;Bi;BRB;BCA;CCDB;DPR;EPRSS;IS;LT;Mem;SP
Wnt7b	9.77914	9.96009	4.25909	3.89257	4.35491	0.333333	2.98203e-09	C1	Negative	P60	GGA;PTSKA	ACAM;Bi;BRB;BCA;CPGD;CCDB;DPR;Di;EPRSS;GIP;Mem;Or
Incenp	11.4579	10.7525	9.15276	8.99393	8.88864	7.44009	3.00078e-09	C1	Negative	P60	Unclassified	Bi;CPGD;CCDB;GIP
Hmgb2	11.3374	10.6734	9.11668	8.55494	8.55816	7.46567	3.03272e-09	C1	Negative	P60	Unclassified	ACAM;Bi;CPGD;CCDB;DPR;EPRSS;GIP;Or
Slc9a7	6.14965	8.07063	9.75923	10.3676	10.6401	10.7023	3.05966e-09	D;U	Positive	P1;P60	ITH;VTSC	BRB;LT;Mem;Or
Psd	6.41317	8.60596	10.5572	10.6269	10.2565	9.59412	3.07449e-09	D	Positive	P1	GGA;VTSC	ACAM;Bi;BCA;CCDB;DPR;EPRSS;LT;Mem
Gm10275	13.476	12.7036	11.2089	10.9782	11.2088	11.1306	3.08674e-09	C1;N	Negative	P4;P60	Unclassified	GIP;Met
Sdc4	11.5376	10.5525	8.05208	9.08375	9.75633	9.39443	3.09909e-09	J	Negative	P1	Unclassified	ACAM;Bi;BCA;CCDB;EPRSS
Slc26a9	9.53108	8.36532	3.09974	5.63221	4.53701	0	3.10725e-09	C1	Negative	P60	ITH	Bi;BRB;GIP;LT;Mem;Or;SP
Nipal3	10.4198	11.0092	12.7524	12.7209	12.7713	12.7566	3.14785e-09	D;U	Positive	P1;P60	ITH	LT;Mem
Fjx1	10.0604	9.84451	4.83498	5.41428	5.38731	1	3.20102e-09	C1	Negative	P60	Unclassified	CCDB;DPR
Atoh8	9.33967	8.82816	2.3023	3.16993	4.46625	1.10731	3.21546e-09	C1	Negative	P60	Unclassified	Bi;BCA;DPR;GIP
Car10	0.333333	3.661	7.84756	8.72889	7.87863	9.93929	3.22009e-09	U	Positive	P60
Myc	11.4598	9.9118	9.22579	8.38443	10.3304	7.40536	3.2508e-09	C1	Negative	P60	Unclassified	BRB;CPGD;DPR;GIP
Tcp11	3.83062	9.41337	9.90129	8.73067	8.07768	6.2926	3.2538e-09	E	Positive	P1
Prkd3	11.5398	11.2325	9.13905	9.15137	8.98386	5.66761	3.27685e-09	C1	Negative	P60	PTSKA	Bi;BCA;CCDB;EPRSS;GIP;Mem;Met
Cdt1	10.8817	9.86142	7.19903	8.47265	8.01331	6.54547	3.285e-09	C1	Negative	P60	Unclassified	Bi;CPGD;GIP;Met
Phlda1	10.928	9.87497	7.65161	8.19409	7.67152	8.37558	3.28739e-09	J;T	Negative	P1;P12	Unclassified	Bi;CPGD;CCDB;DPR;GIP;Mem;Or
Slc29a4	6.83396	10.4943	11.0651	10.5868	9.70186	6.63594	3.39473e-09	B	Positive	E15.5_Ngn3_Het	Unclassified	LT;Mem
Gfi1	9.20058	7.81373	0.666667	3.93793	5.54639	0	3.40325e-09	C1	Negative	P60	Unclassified	Bi;BRB;BCA;CCDB;DPR;EPRSS;GIP;IS;Met;Or
Suclg2	11.6058	10.8977	9.21303	8.92679	9.13637	9.27849	3.4297e-09	C1;J;T	Negative	P1;P12;P60	GGPMTC;OOMA;OMPFAA	Bi;BCA;CCDB;Mem;Met
Dusp18	7.79	10.27	11.01	10.6	10.52	10.43	3.44481e-09	A;D	Positive	E15.5_Ngn3_Het;P1	PTSKA	ACAM;BCA;CCDB;EPRSS;GIP;LT;Mem;Met
Pea15a	10.122	11.3303	12.287	12.3197	12.3293	12.0213	3.50517e-09	D	Positive	P1	GGPMTC	Bi;CPGD;CCDB;EPRSS;LT
Pdk1	12.1714	11.2513	10.1591	9.99721	10.1509	8.81567	3.50733e-09	C1	Negative	P60	GGPMTC;OOMA;PTSKA	Bi;BCA;CPGD;CCDB;Di;EPRSS;IS;Mem;Met
Npas4	1.19499	5.31791	8.97833	7.95467	5.59755	11.886	3.53002e-09	Y	Positive	P60
Tkt	13.2589	12.4764	11.0874	10.8204	11.1027	10.7373	3.53359e-09	C1;J	Negative	P1;P60	GGPMTC;OOMA	Bi;BCA;GIP;Met;Or
Arhgef19	10.9125	10.438	7.11321	7.78386	7.54276	7.92194	3.62131e-09	J	Negative	P1	GGA	Bi;BCA;CCDB
Klhdc7a	9.98648	9.55289	4.20475	5.60584	6.05358	0.666667	3.62595e-09	C1	Negative	P60	Unclassified	Bi;Mem
Scnn1g	2.38998	5.32311	8.87046	9.16021	8.29908	8.91585	3.6264e-09	D	Positive	P1	ITH;MPIC	Bi;BRB;EPRSS;LT;Mem;Or;SP
Edaradd	10.6802	9.20607	7.62193	7.49992	8.17348	5.64416	3.64688e-09	C1	Negative	P60	Unclassified	DPR
Lrp8	7.78022	10.3747	11.5206	10.2385	9.85025	10.8263	3.64824e-09	D	Positive	P1
Cacna1b	4.54	8.06	9.61	9.51	9.26	8.85	3.66495e-09	A;D	Positive	E15.5_Ngn3_Het;P1	CMP;GGA;IPS;ITH;MPIC;VTSC	ACAM;Bi;BRB;Di;EPRSS;LT;Mem;SP
Olfm4	2.16395	4.39123	8.02037	8.38745	9.71122	9.56197	3.66652e-09	D;P;U	Positive	P1;P12;P60	Unclassified	ACAM;Bi;CCDB;DPR;EPRSS;IS;LT;Mem;Or
Il22ra1	9.58439	8.08443	1.44064	5.51207	6.8571	0	3.68856e-09	C1	Negative	P60	Unclassified	Bi;EPRSS;Mem
Cyba	10.3692	9.84785	5.61057	6.37312	7.27482	2.05664	3.69722e-09	C1	Negative	P60	GGPMTC;OOMA	Bi;BRB;BCA;CPGD;CCDB;DPR;EPRSS;IS;Mem;Met;Or;SP
Tmem45a	10.0819	9.63202	2.97196	7.23549	6.07467	0.333333	3.70165e-09	C1	Negative	P60
Apbb1	7.2	9.74	10.49	10.54	10.22	10.88	3.71292e-09	A;D;U	Positive	E15.5_Ngn3_Het;P1;P60	Unclassified	ACAM;Bi;BCA;CPGD;CCDB;DPR;Di;EPRSS;GIP;Mem;Met;Or;SP
Col18a1	11.6219	12.6526	9.39648	9.51371	8.84962	6.17193	3.73692e-09	C1	Negative	P60	Unclassified	ACAM;Bi;BCA;CPGD;CCDB;DPR;EPRSS;Mem;Or
Gm13344	8.59371	6.61819	0	1.96896	3.89608	0	3.77315e-09	J	Negative	P1
Celf6	1.3	7.04	7.61	7.92	7.82	9	3.79129e-09	A;U	Positive	E15.5_Ngn3_Het;P60	Unclassified	Bi;CCDB;GIP
Fam131a	4.94745	8.84515	9.43541	9.49912	9.05986	9.93769	3.79472e-09	D	Positive	P1	Unclassified	CCDB
2010300C02Rik	11.6624	10.4632	9.37228	9.64152	9.73946	8.05095	3.81114e-09	C1	Negative	P60
Hspe1	11.5626	10.5471	9.19132	8.96872	8.83834	10.2148	3.83185e-09	S;T	Negative	P12	Unclassified	Bi;CCDB
Myo5b	11.4364	10.9576	8.53075	8.6264	8.95216	9.1894	3.88444e-09	J;T	Negative	P1;P12	VTSC	Bi;BCA;LT;Or
5330413P13Rik	0.861654	6.79384	8.1839	8.01995	7.78174	7.28532	3.90759e-09	D	Positive	P1
Nde1	11.0893	10.4942	8.22464	8.21563	8.24177	7.54772	3.91434e-09	C1	Negative	P60	Unclassified	ACAM;Bi;CPGD;CCDB;DPR;GIP;LT;Mem
Pabpc4	12.239	11.2936	10.378	9.91924	9.88601	9.91263	3.91687e-09	C1;J	Negative	P1;P60	Unclassified	Bi;GIP
Sult1d1	3.55924	7.42066	9.45693	9.13343	9.38637	6.05379	3.92017e-09	D	Positive	P1	Unclassified	BCA;Met
Celf4	4.89	8.3	9.34	9.57	9.49	9.81	3.95476e-09	A;D;U	Positive	E15.5_Ngn3_Het;P1;P60	MPIC	Bi;CCDB;GIP;Mem
Bsn	7.25425	9.0681	10.5558	10.7151	10.5537	10.8424	3.95649e-09	D;U	Positive	P1;P60	Unclassified	ACAM;Bi;CCDB;GIP;Mem;SP
2810417H13Rik	10.7633	9.86513	7.31214	8.39746	7.25213	5.56673	3.95976e-09	C1	Negative	P60	Unclassified	Bi;CPGD;CCDB;EPRSS;GIP
Brca1	11.0891	10.1591	8.10197	8.8311	8.38028	7.30568	3.96775e-09	C1;J;T	Negative	P1;P12;P60	IPS;OMPFAA	Bi;BCA;CPGD;CCDB;DPR;Di;EPRSS;GIP;Mem;Met
Wwc2	10.7931	10.4184	7.51419	7.58496	7.60167	3.81793	3.9934e-09	C1	Negative	P60	Unclassified	Bi;CPGD;CCDB;EPRSS;GIP
Nop56	12.1785	11.3537	9.80191	9.92543	10.036	10.069	4.01277e-09	C1;J	Negative	P1;P60	Unclassified	Bi;CCDB;GIP;Mem;Met
Ugt2b35	9.58691	9.27741	3.91746	4.35894	4.29606	0	4.01675e-09	C1	Negative	P60	Unclassified	Bi;BCA;Di;Met
Gmpr	7.09046	7.7764	10.6168	10.4465	11.2343	10.7392	4.04465e-09	D;O;U	Positive	P1;P12;P60	OOMA	BCA;CCDB;Met
Defb1	1.52832	3.19499	7.91168	8.91059	9.03257	9.33873	4.0649e-09	D;K;U	Positive	P1;P4;P60	Unclassified	CCDB;EPRSS;IS;Or
Noc2l	11.9076	11.1441	9.76231	9.5859	9.63712	9.21565	4.06652e-09	C1;J;T	Negative	P1;P12;P60	Unclassified	Bi;CPGD;EPRSS;GIP;LT
Melk	10.7681	9.8902	7.63199	7.76552	7.71505	5.79623	4.07099e-09	C1	Negative	P60	CMP;PTSKA	Bi;BCA;CPGD;CCDB;DPR;Mem;Met
Soga1	9.25315	10.7764	11.9375	11.8438	11.4422	9.94711	4.09718e-09	E	Positive	P1	PTSKA	EPRSS;Met;Or
Litaf	11.3523	11.277	8.76763	8.57679	8.63351	6.22821	4.11331e-09	C1	Negative	P60	Unclassified	Bi;BRB;CPGD;DPR;EPRSS;GIP;LT;Mem;Or
Slc29a1	9.84041	10.9013	12.0363	12.1167	11.9442	12.117	4.12557e-09	D;U	Positive	P1;P60	GGPMTC;MPIC;OOMA	BRB;EPRSS;LT;Mem
Trpc1	5.05	8.4	9.79	9.73	9.35	9.24	4.13242e-09	A;D	Positive	E15.5_Ngn3_Het;P1	CMP;ITH;MPIC	ACAM;Bi;BRB;EPRSS;LT;Mem;SP
Amy2a1	14.3461	13.2595	9.4618	14.8613	16.4076	9.71344	4.13895e-09	Predicted_contaminant
Mybbp1a	13.6992	12.8911	11.5031	11.3522	11.4523	11.0999	4.16198e-09	C1;J	Negative	P1;P60	OOMA	CPGD;CCDB;DPR;EPRSS;GIP;LT;Mem;Met
Calu	12.7332	12.223	10.2892	10.5115	10.4938	10.4635	4.22483e-09	C1;J	Negative	P1;P60	CMP;VTSC	Bi;BRB;CCDB;IS;Mem;Or
C2cd4a	2.49728	6.34471	9.59354	8.01503	7.7582	9.13222	4.23799e-09	D	Positive	P1
1110002E22Rik	1	5.48081	8.99379	7.6663	8.23462	7.45007	4.25466e-09	D	Positive	P1
Arhgap19	11.0744	10.5651	8.64545	8.26688	7.98188	5.9847	4.3046e-09	C1	Negative	P60	GGA	BCA;CCDB;EPRSS
Cxadr	12.3998	11.9629	10.2986	10.2102	10.1261	9.25252	4.33625e-09	C1	Negative	P60	Unclassified	ACAM;Bi;BRB;CPGD;CCDB;DPR;Di;EPRSS;GIP;IS;LT;Mem;Or;SP
Fgd3	9.76109	9.19121	3.74931	4.90856	5.98485	0.773976	4.3538e-09	C1	Negative	P60	GGA	Bi;BCA;CCDB
C330027C09Rik	11.2457	10.4513	9.16584	8.75081	8.32424	7.29251	4.35863e-09	C1	Negative	P60	Unclassified	Bi;CPGD;CCDB;DPR;Mem
Dennd4c	10.5798	11.372	12.8263	12.7663	12.8343	12.6777	4.42955e-09	D;U	Positive	P1;P60	GGA;IPS	BCA;CCDB;EPRSS;LT;Mem
Ncam1	6.17	9.3	10.16	10.15	10.09	9.07	4.46112e-09	A;D;O	Positive	E15.5_Ngn3_Het;P1;P12	VTSC	ACAM;Bi;CCDB;DPR;EPRSS;LT;Mem;SP
Rspo4	1.10731	6.50123	8.09945	7.84708	8.10951	7.77209	4.46558e-09	D	Positive	P1	Unclassified	Bi;CCDB;EPRSS
Cdv3	12.6126	12.0707	10.7975	10.4332	9.90957	10.0602	4.49994e-09	C1;N	Negative	P4;P60	Unclassified	CCDB;GIP
Plbd1	9.43042	9.02493	2.16395	4.06656	5.10295	0.666667	4.5255e-09	C1	Negative	P60	Unclassified	BCA;Met;Or
Nrxn1	3.25163	6.62403	8.07494	9.12036	8.92487	9.85659	4.53934e-09	D;U	Positive	P1;P60	CMP;IPS;ITH;MPIC;VTSC	ACAM;Bi;BRB;CCDB;DPR;EPRSS;LT;Mem;Or;SP
Gm9294	11.3946	10.5519	9.05693	8.61438	9.05661	8.87691	4.5557e-09	N	Negative	P4
Gadd45g	8.18466	9.93787	10.5	11.2437	10.3685	12.0299	4.58763e-09	D;U	Positive	P1;P60	Unclassified	BCA;EPRSS;Met
Pianp	5.67441	8.61258	9.71137	10.3215	9.49161	9.91205	4.62151e-09	D	Positive	P1	Unclassified	Mem
Col4a5	10.7763	10.723	6.77723	7.39627	8.13484	1.52832	4.62163e-09	C1	Negative	P60	IPS	ACAM;CCDB;Di;EPRSS;Mem
Neb	4.87645	5.15689	9.28385	9.47323	10.0011	12.0988	4.64581e-09	U;V	Positive	P60	Unclassified	Bi;BRB;CCDB;DPR
Pygb	11.455	11.0787	7.90835	8.85819	8.95442	9.8227	4.67895e-09	J	Negative	P1	OOMA	Met
BC030476	10.3084	9.45062	6.59077	6.11647	6.94425	3.67712	4.70223e-09	C1	Negative	P60
Mapk10	3.69138	4.92162	7.94127	9.68849	9.71594	10.9038	4.73379e-09	K;U	Positive	P4;P60	PTSKA	Bi;BCA;CCDB;Di;EPRSS;IS;LT;Mem;Met
Lypd6	9.47688	8.3017	4.56844	4.94897	4.38914	1	4.74905e-09	C1	Negative	P60
Ticrr	10.5905	9.6533	7.44458	7.59948	7.19389	4.54889	4.78588e-09	C1	Negative	P60	Unclassified	Bi;CPGD;CCDB;EPRSS;GIP;Met
Asns	12.6843	11.5427	10.2429	10.1282	10.9345	11.5074	4.85017e-09	Singleton	Negative	P4
Fgfr3	10.9996	11.7725	8.32865	8.01458	8.16803	3.16395	4.86463e-09	C1	Negative	P60	GGA;IPS;ITH;PTSKA	Bi;BRB;BCA;CPGD;CCDB;DPR;Di;EPRSS;GIP;IS;Mem;Met;Or
Slc28a3	10.679	11.4061	6.34107	7.36514	7.93854	2.26912	4.8738e-09	C1	Negative	P60	ITH	LT;Mem
Prss23	10.4938	9.41934	7.55682	7.7771	6.60896	3.33145	4.87437e-09	C1	Negative	P60	Unclassified	BCA;GIP;Met;Or
Dhcr24	11.5449	10.6718	9.09067	9.10902	9.81536	7.83948	4.94087e-09	C1	Negative	P60	GGA;OOMA	Bi;BCA;CPGD;CCDB;DPR;EPRSS;GIP;LT;Mem;Met;Or
Kcnc3	6.92	9.94	10.08	10.54	10.33	9.58	5.02282e-09	A;D;O	Positive	E15.5_Ngn3_Het;P1;P12	ITH;MPIC;VTSC	ACAM;Bi;CCDB;LT;Mem;SP
Prom1	11.4244	11.4694	7.94185	8.0235	9.56178	8.58631	5.04979e-09	C1;J;N	Negative	P1;P4;P60	Unclassified	DPR;Mem;Or
Kif23	11.157	10.6949	8.85346	8.54591	8.17277	6.10079	5.12549e-09	C1	Negative	P60	Unclassified	ACAM;Bi;BRB;BCA;CPGD;CCDB;DPR;Di;GIP;Met
Pcna-ps2	11.7079	10.6332	9.15122	9.81368	9.40565	9.67588	5.15002e-09	J	Negative	P1	Unclassified	BCA;CPGD;GIP
C2cd2l	8.05268	9.63382	10.7482	11.046	10.6681	11.294	5.18062e-09	D	Positive	P1	Unclassified	Bi;Mem
Ankrd44	9.85648	11.9911	12.1683	11.7032	11.8106	10.6106	5.21013e-09	E	Positive	P1
Dbt	11.1691	10.3254	8.56719	8.36135	8.87954	8.07903	5.2218e-09	C1;J	Negative	P1;P60	OMPFAA	BCA;CCDB;Met
Rhov	10.3961	9.01548	7.16105	7.58464	5.88575	6.4082	5.23302e-09	T	Negative	P12	Unclassified	LT
Emb	10.5564	12.152	12.9195	12.1536	12.2008	12.9503	5.33615e-09	U	Positive	P60	ITH	ACAM;LT
Rims4	9.53736	7.95589	3.87034	5.48202	5.72707	1.79744	5.34524e-09	C1	Negative	P60	MPIC;VTSC	ACAM;Bi;LT;Mem
Pde8b	10.1921	8.8254	5.9122	5.80346	6.53411	7.37014	5.35586e-09	C1;J;N	Negative	P1;P4;P60	Unclassified	Bi;BCA;EPRSS;GIP;LT;Met
Fzd5	10.7607	9.83658	7.42566	7.72747	7.773	7.59398	5.4638e-09	C1;J;T	Negative	P1;P12;P60	GGA;PTSKA	ACAM;Bi;BCA;CPGD;CCDB;DPR;Di;EPRSS;GIP;IS;Mem;Or
Smc4	12.6631	11.9552	10.8364	10.6307	10.417	9.47767	5.50523e-09	C1	Negative	P60	Unclassified	Bi;CPGD;CCDB;GIP
Ccl28	2.92052	6.25455	8.05694	8.84413	8.88747	9.435	5.52455e-09	D;U	Positive	P1;P60	GGA;ITH	ACAM;Bi;BRB;CCDB;EPRSS;IS;Or
Emilin1	8.12503	8.0311	10.6859	10.9002	11.4626	12.0085	5.53654e-09	U	Positive	P60	Unclassified	ACAM;Bi;CCDB
Igfals	5.65187	6.60424	9.6573	10.0031	10.1392	11.4282	5.58884e-09	U	Positive	P60	Unclassified	ACAM;Bi;CCDB;GIP;Or
Nsun2	12.5794	11.8839	10.4732	10.3957	10.3005	10.3962	5.68999e-09	C1;J	Negative	P1;P60	Unclassified	BCA;CPGD;GIP
Ptpn13	11.9233	11.4305	9.86153	9.81464	9.30482	9.18263	5.70365e-09	C1;J	Negative	P1;P60	Unclassified	Bi;BCA;CCDB;GIP;Mem;Met;Or
Gfra3	6.22461	10.2206	10.4745	9.58894	8.7392	10.0025	5.71472e-09	D	Positive	P1	Unclassified	Bi;Mem
Dach1	8.91	10.79	11.4	11.13	11.2	10.67	5.71831e-09	A;D	Positive	E15.5_Ngn3_Het;P1	Unclassified	ACAM;Bi;BCA;CPGD;CCDB;GIP
Cul9	7.79	9.59	10.57	10.81	10.88	10.63	5.78531e-09	A;D;K;O	Positive	E15.5_Ngn3_Het;P1;P12;P4	Unclassified	Bi;BCA;CPGD;CCDB;Met
Adora1	11.3952	9.72633	8.40138	9.66645	10.0878	7.83111	5.7862e-09	C1	Negative	P60
Gabra4	10.2155	8.9941	4.54645	5.39928	7.34979	8.39887	5.91789e-09	G	Negative	P1
Tmem150c	5.29012	8.02904	9.66932	9.7575	9.59166	9.84792	5.93743e-09	D	Positive	P1	Unclassified	Mem
Dync2h1	9.68561	11.2989	11.8106	11.886	11.8383	10.8689	6.11353e-09	D;O	Positive	P1;P12	Unclassified	ACAM;Bi;BCA;CCDB;DPR;EPRSS;LT;Mem;Met;Or
Rab3b	5.75445	8.41726	10.0981	10.2754	10.1148	7.76159	6.12055e-09	D;O	Positive	P1;P12	GGA	ACAM;Bi;BRB;BCA;CCDB;EPRSS;LT;Met;Or
Hsd17b10	11.1269	10.4171	8.6177	8.29891	8.62523	7.95363	6.1384e-09	C1;J	Negative	P1;P60	OOMA;OMPFAA	Bi;BCA;Di;GIP;Mem;Met;Or
Anp32b	12.8078	12.2149	11.0154	10.636	10.4385	9.99005	6.1788e-09	C1;J;T	Negative	P1;P12;P60	Unclassified	Bi;CPGD;DPR;GIP;LT;Or
Rasef	9.55412	8.5728	3.26154	5.13651	6.17925	0.333333	6.21615e-09	C1	Negative	P60	Unclassified	Bi;BCA;CCDB;EPRSS;LT;Mem
Syt5	5.09676	8.17361	8.9773	9.52842	9.61555	10.3829	6.2373e-09	D;U	Positive	P1;P60	CMP;VTSC	ACAM;Bi;CCDB;LT;Mem;Or;SP
Dbf4	10.8958	10.0849	8.50356	8.01922	7.95175	6.42631	6.25442e-09	C1	Negative	P60	PTSKA	Bi;BCA;CPGD;GIP;Met
Dnaja4	5.90689	8.57014	9.56872	10.0768	9.69709	10.6933	6.30126e-09	D;U	Positive	P1;P60	Unclassified	Bi;CCDB;EPRSS;Mem;Met
Trip6	10.1994	9.4216	5.49451	6.522	6.85943	4.0687	6.33453e-09	C1	Negative	P60	Unclassified	ACAM;Bi;BCA;CCDB;EPRSS;GIP;LT;Mem
Rnase1	11.8088	10.4936	7.80154	13.9645	14.8174	7.50149	6.36865e-09	Predicted_contaminant
Gm13461	11.6733	10.7748	9.61363	9.43691	9.35484	9.21941	6.36866e-09	J	Negative	P1
Ddx39	11.6526	10.9788	9.45713	9.49315	9.33652	8.62083	6.36942e-09	C1	Negative	P60	Unclassified	Bi;BCA;GIP;Mem
Eno1	11.8802	11.4096	9.46121	9.49653	9.74328	9.52155	6.38033e-09	C1;J	Negative	P1;P60	GGPMTC;OMPFAA	Bi;BCA;CCDB;GIP;Mem;Met
Jph3	2.83062	5.67111	8.62396	8.82834	9.25703	7.76028	6.39972e-09	D;O	Positive	P1;P12	ITH;MPIC	ACAM;BRB;CCDB;LT;Mem;Or;SP
Chaf1a	10.8863	10.0155	7.72493	8.60429	8.06928	6.7625	6.40013e-09	C1	Negative	P60	Unclassified	Bi;CPGD;CCDB;GIP
Fam110c	9.99514	8.76417	5.8233	6.00519	6.00813	4.80674	6.40117e-09	C1	Negative	P60	Unclassified	ACAM;Bi;CPGD;CCDB;EPRSS;GIP
Wdr96	1.3023	6.77481	8.84228	8.39814	6.53219	6.94613	6.4926e-09	D	Positive	P1	Unclassified	BCA;CPGD;CCDB;EPRSS;Mem;Met
Macc1	9.66431	8.95216	5.23344	5.36077	4.50879	1.33333	6.50179e-09	C1	Negative	P60
Smap2	9.98112	11.1843	12.0059	11.9385	11.9812	12.4594	6.50679e-09	D;U	Positive	P1;P60	GGA	Bi;BCA;CCDB;EPRSS;GIP
Ran	12.7805	12.1608	10.8657	10.5955	10.4485	10.2934	6.52381e-09	C1;J;T	Negative	P1;P12;P60	GGA	Bi;BCA;CPGD;CCDB;Di;EPRSS;GIP;LT;Mem;Met;Or
Mpeg1	9.91315	10.419	3.22414	3.89783	6.98025	3.8049	6.53281e-09	J	Negative	P1
Bub1	10.8597	10.1897	8.17899	8.203	7.79569	5.75745	6.55983e-09	C1	Negative	P60	PTSKA	Bi;BCA;CPGD;CCDB;DPR;GIP;Mem;Met
Rpl18a	12.6683	12.1162	10.7601	10.2607	10.5899	10.0091	6.58022e-09	C1;N	Negative	P4;P60	Unclassified	CCDB;GIP;Mem;Met
Sephs2	11.7694	10.7351	9.64401	9.60239	10.0247	8.63144	6.6303e-09	C1	Negative	P60	OMPFAA	Bi;BCA
Tmem28	2.90475	6.70735	8.18584	8.57224	8.63196	9.05688	6.66804e-09	D	Positive	P1	Unclassified	Mem
Timeless	10.9498	10.1795	7.86237	8.7781	8.10963	6.77573	6.70744e-09	C1	Negative	P60	Unclassified	Bi;BRB;CPGD;DPR;EPRSS;GIP
Enpp1	10.0157	9.80646	5.4255	5.39953	5.99171	1.33333	6.70803e-09	C1	Negative	P60	CMP;GGPMTC;IPS;ITH;VTSC	Bi;BRB;BCA;CPGD;CCDB;DPR;Di;EPRSS;GIP;IS;LT;Mem;Met;SP
Exo1	10.4144	9.41241	6.6241	7.46845	6.98047	5.26315	6.74204e-09	C1	Negative	P60	Unclassified	Bi;CPGD;GIP;IS
Ncapg2	11.5292	10.6596	9.12867	9.52603	9.3911	8.42074	6.83216e-09	C1	Negative	P60	Unclassified	Bi;CPGD;GIP;Mem
Cdh8	3.9339	6.0373	8.52698	8.91767	9.25309	11.0687	6.84941e-09	D;U	Positive	P1;P60	CMP	ACAM;Bi;CCDB;EPRSS;Mem;SP
Pfkfb3	10.5319	9.65552	7.501	7.53798	7.48659	3.48511	6.95209e-09	C1	Negative	P60	Unclassified	Bi;BCA;DPR;Met
Nav1	9.92527	11.0536	12.2935	12.303	12.1214	10.5713	6.96066e-09	D	Positive	P1	Unclassified	Bi;BCA
Gpd1	6.92552	8.65459	10.9098	10.4297	9.93485	10.4394	6.97008e-09	D	Positive	P1	GGPMTC;OOMA	Bi;BCA;CCDB;EPRSS;LT;Met;Or
Acadl	11.5989	11.0762	9.39849	9.38103	9.26862	8.22561	6.99896e-09	C1;J	Negative	P1;P60	OOMA;OMPFAA	Bi;BRB;BCA;CCDB;EPRSS;Mem;Met
Rpl35	11.9124	11.2661	9.96721	9.50502	9.61158	9.57915	7.00884e-09	C1;J;N	Negative	P1;P4;P60	Unclassified	CCDB;GIP;Met
Prkcb	8.77667	9.84602	11.3816	11.325	11.3873	10.6073	7.06582e-09	D;O	Positive	P1;P12	CMP;GGPMTC;GGA;ITH;MPIC;PTSKA;VTSC	ACAM;Bi;BRB;BCA;CPGD;CCDB;DPR;Di;EPRSS;GIP;IS;LT;Mem;Met;Or;SP
Flrt1	4.8049	8.73758	9.58717	9.59096	9.07835	7.45072	7.06915e-09	D	Positive	P1	Unclassified	Bi;CCDB;Mem
Tph2	0	2.37643	7.87264	7.84019	8.33303	9.44598	7.12053e-09	D;U	Positive	P1;P60	OOMA;OMPFAA	Bi;BRB;BCA;EPRSS;Met;SP
Atad2	11.8554	11.0695	9.59207	10.0724	9.73082	8.68463	7.14524e-09	C1	Negative	P60	Unclassified	Bi;BCA;GIP;Met;Or
Rad51	10.864	10.0303	7.77187	8.40755	8.03887	7.18658	7.22867e-09	C1;J	Negative	P1;P60	Unclassified	Bi;BCA;CPGD;CCDB;Di;EPRSS;GIP
Tubb5	14.9018	14.2379	12.6407	12.7938	12.5124	11.2576	7.28854e-09	C1	Negative	P60	GGA	ACAM;Bi;BCA;CPGD;CCDB;GIP;Mem;Met;Or
Slc1a3	9.25717	8.19285	2.16395	3.93793	6.25473	0	7.34705e-09	C1	Negative	P60	ITH;OMPFAA	Bi;BRB;BCA;CCDB;DPR;EPRSS;LT;Mem;Met;SP
Gm15681	1.10731	6.28203	8.60306	6.97982	8.43192	6.64172	7.41227e-09	D	Positive	P1
Prdm16	11.4771	11.4859	9.68549	9.21077	8.4719	3.35491	7.43325e-09	B1;C1	Negative	P60	Unclassified	Bi;BRB;CCDB;DPR;EPRSS;GIP;IS
Ercc6l	10.3965	9.3641	7.04923	7.1985	6.88742	5.41558	7.46851e-09	C1	Negative	P60	Unclassified	Bi;BCA;CPGD;GIP;Mem;Met
Igfbp5	12.2126	11.8762	9.17732	9.43193	11.0151	10.136	7.48412e-09	C1;J	Negative	P1;P60	IPS	Bi;EPRSS
Gcnt1	11.1322	10.245	8.99747	9.26447	8.58531	3.65574	7.50263e-09	B1;C1	Negative	P60	Unclassified	ACAM;CCDB;DPR;Mem;Met;Or
Atad3a	11.4281	10.6697	9.19067	9.14106	9.09986	8.52248	7.55529e-09	C1;J	Negative	P1;P60	Unclassified	Bi;BCA;CCDB;Mem;Met
Rpl14	13.0699	12.34	11.2211	10.7334	10.901	10.6798	7.58644e-09	C1;J;N	Negative	P1;P4;P60	Unclassified	Bi;CCDB;GIP;Mem;Met;Or
Cxxc4	9.23092	10.6317	11.4618	11.7504	11.4145	10.6859	7.63128e-09	D;O	Positive	P1;P12	Unclassified	Bi;CCDB;EPRSS;GIP;Or
Chn2	9.37579	7.99947	4.33847	5.0641	5.1442	0.861654	7.7084e-09	C1	Negative	P60	GGA	Bi;BCA;EPRSS;Mem
Gm6274	11.5399	10.8217	9.42343	8.92548	9.24816	9.32779	7.70937e-09	N	Negative	P4
Impa2	9.25057	7.98319	3.54312	4.42089	5.34246	0.528321	7.71352e-09	C1	Negative	P60	Unclassified	Bi;BCA;CCDB;Met
Rcc1	10.9336	10.1848	8.23177	8.36175	8.05718	7.44999	7.74551e-09	C1	Negative	P60	GGA	Bi;BCA;CPGD;GIP;Mem
Cx3cr1	8.7335	10.3086	1.46411	1.79744	3.89608	1.38998	7.76034e-09	C1;J;Z	Negative	P1;P60	GGA	ACAM;Bi;BRB;CPGD;CCDB;DPR;EPRSS;IS;Mem;SP
Ocln	11.6014	10.9716	9.59546	9.34649	9.19864	8.58896	7.76975e-09	C1;J	Negative	P1;P60	Unclassified	ACAM;Bi;BCA;CCDB;Di;IS;Mem;Met;Or
Apoc1	9.21098	8.62948	3.02561	3.26912	5.1498	0.666667	7.78378e-09	C1	Negative	P60	ITH;OMPFAA;VTSC	Bi;BRB;BCA;CCDB;LT;Met;Or
Ppp1r1b	9.77042	9.70528	4.02158	5.06152	5.69899	0.773976	7.89247e-09	C1	Negative	P60	GGA	Bi;BRB;BCA;CCDB;EPRSS;GIP;SP
Rrs1	10.8877	9.90603	8.21803	7.9777	8.48491	7.56721	7.92985e-09	C1;J	Negative	P1;P60	Unclassified	Bi;CPGD;CCDB;DPR;GIP;Or
Amy2a5	14.3174	13.3195	9.6242	14.5561	15.9429	9.61495	7.94018e-09	Predicted_contaminant
Agrn	12.6399	12.6294	10.5358	10.7505	10.4144	8.62741	7.98916e-09	C1	Negative	P60	CMP;GGA	ACAM;Bi;BRB;BCA;CPGD;CCDB;DPR;EPRSS;GIP;LT;Mem;Met;Or
Akap6	2.92712	6.02686	9.4019	9.12039	7.80028	7.674	8.05691e-09	D;K	Positive	P1;P4	MPIC	Bi;CCDB;EPRSS;GIP;LT;Mem
Kif20a	11.2143	10.6033	9.16083	8.62804	8.60592	7.35958	8.06217e-09	C1	Negative	P60	Unclassified	ACAM;Bi;BCA;CPGD;CCDB;LT;Met;Or
Lgr4	11.9399	11.3323	9.77309	9.59071	10.0115	9.34247	8.12e-09	C1;J	Negative	P1;P60	GGA;VTSC	ACAM;Bi;BRB;BCA;CPGD;DPR;EPRSS;GIP;IS;LT;Mem;SP
Sntg1	1.10731	5.24406	7.44491	7.79706	8.51549	8.64554	8.14292e-09	D	Positive	P1	Unclassified	Bi;CCDB;GIP;Mem
D10Bwg1379e	10.3319	10.392	12.5985	12.6565	12.7617	12.4137	8.20467e-09	D	Positive	P1	Unclassified	BCA;Mem;Met;Or
Numbl	6.39064	10.4981	9.95559	9.89522	9.73612	7.84328	8.29451e-09	B	Positive	E15.5_Ngn3_Het	Unclassified	DPR
Phb2	12.6814	12.035	10.7888	10.5525	10.5825	9.94399	8.34859e-09	C1;J;T	Negative	P1;P12;P60	Unclassified	Bi;BRB;CPGD;CCDB;DPR;EPRSS;GIP;Mem;Or
Gm5809	10.3071	8.81182	5.81557	7.02273	8.20089	5.52091	8.36159e-09	C1	Negative	P60
Slc12a7	9.51492	11.2794	12.1121	11.7689	11.4	9.66608	8.42544e-09	B;E	Positive	E15.5_Ngn3_Het;P1	Unclassified	BRB;LT
Pde3b	10.0769	11.1549	12.2117	12.2244	12.1233	11.6934	8.48044e-09	D;O	Positive	P1;P12	GGPMTC;GGA;IPS	ACAM;Bi;BRB;BCA;CCDB;DPR;EPRSS;IS;LT;Mem;Met
Phyhipl	5.19923	8.67078	9.22785	9.54748	9.41944	9.31957	8.54023e-09	D	Positive	P1	Unclassified	Bi;CCDB
Soga3	2.63563	5.70891	7.9359	8.53902	8.44304	9.83423	8.55236e-09	D;U	Positive	P1;P60	Unclassified	CCDB;Mem;Met
Spc24	10.7043	9.6359	7.87127	8.19491	7.70423	6.62573	8.56492e-09	C1	Negative	P60	Unclassified	Bi;CPGD;GIP
Zfp365	3.15178	5.91676	9.0814	8.56153	8.83466	8.42999	8.58407e-09	D	Positive	P1	Unclassified	Bi;CCDB
Zfp703	11.3314	11.4374	8.87997	8.73619	8.79931	6.60098	8.60826e-09	C1	Negative	P60	PTSKA	ACAM;Bi;CPGD;CCDB;DPR;EPRSS;GIP
Srm	12.0616	10.8896	9.59929	10.3213	10.1253	10.3288	8.71109e-09	J	Negative	P1	Unclassified	BCA;Met
Gm13394	12.7751	11.8917	11.0303	10.5944	10.1713	11.346	8.74721e-09	S	Negative	P12
Sema7a	9.7288	7.99956	5.64309	5.76503	6.08356	3.65043	8.8641e-09	C1	Negative	P60	Unclassified	ACAM;CPGD;CCDB;DPR;EPRSS;IS;Mem;Met
Hpgd	9.65024	9.29538	5.74083	4.37857	4.71796	1.05664	8.89117e-09	C1	Negative	P60	GGA;OOMA;OMPFAA;PTSKA	Bi;BCA;CPGD;CCDB;DPR;EPRSS;GIP;Mem;Met;Or
Col2a1	8.65848	10.6113	2.64555	3.26045	2.85408	0	8.90392e-09	C1	Negative	P60	Unclassified	Bi;BRB;CPGD;CCDB;DPR;EPRSS;Mem
Cdk2	10.8776	10.2495	7.84623	8.46933	8.30524	5.75238	8.92703e-09	C1	Negative	P60	GGA;IPS;ITH;PTSKA	Bi;BRB;BCA;CPGD;CCDB;DPR;Di;EPRSS;GIP;LT;Or
Slc37a1	8.85805	10.4025	11.7081	11.2395	10.7464	10.6084	8.93532e-09	D	Positive	P1	Unclassified	Mem
Gm4617	12.9366	12.0799	11.0957	10.9329	10.7537	10.4109	8.97087e-09	C1	Negative	P60
Clmn	11.6389	11.7049	9.281	9.45952	9.50909	5.19416	9.00903e-09	C1	Negative	P60	Unclassified	Bi;CPGD;CCDB;DPR;Mem
Ndrg2	10.1486	9.02272	6.12708	6.89172	7.28628	2.62345	9.01898e-09	C1	Negative	P60	Unclassified	Bi;CPGD;CCDB;DPR;EPRSS;GIP;Or;SP
Erp27	10.5528	9.19857	3.08893	8.62	9.84569	1.46411	9.05489e-09	A1	Negative	P60
Nolc1	12.4695	11.6434	10.2586	10.5013	10.4643	10.3626	9.11519e-09	C1;J	Negative	P1;P60	Unclassified	Bi;CCDB;GIP
Prc1	11.7078	11.1015	9.82209	9.63535	9.51163	7.8728	9.15751e-09	C1	Negative	P60	Unclassified	Bi;CPGD;CCDB;GIP;Mem
Tmod1	4.48844	6.58442	9.86965	9.68805	9.08372	8.3155	9.16337e-09	D	Positive	P1	Unclassified	Bi;BRB;CCDB;GIP;Mem;SP
Nkx2-2	9.97	12.34	11.71	11.73	11.45	11.73	9.18497e-09	A	Positive	E15.5_Ngn3_Het	Unclassified	DPR
Rplp1	14.1772	13.2529	11.9387	11.7457	12.1348	12.0925	9.38774e-09	C1;J;N	Negative	P1;P4;P60	Unclassified	CCDB;GIP;Met
Epha7	10.459	9.85479	6.82415	7.0812	7.00748	5.99947	9.39152e-09	C1	Negative	P60	PTSKA	ACAM;Bi;CPGD;DPR;EPRSS;Mem;Met;SP
Elmod1	0.33	8.11	7.53	6.92	6.86	6.75	9.41203e-09	A	Positive	E15.5_Ngn3_Het	GGA	BCA;CCDB;GIP;Or
Sphk1	9.61175	9.11195	3.62345	4.99144	6.16975	1.33333	9.42269e-09	C1	Negative	P60	CMP;GGA;OOMA;OMPFAA;VTSC	ACAM;Bi;BRB;BCA;CPGD;CCDB;DPR;EPRSS;GIP;LT;Mem;Met;Or;SP
Gm5506	11.4895	11.0113	9.15686	9.19099	8.68553	9.58757	9.60124e-09	C1;J;T	Negative	P1;P12;P60	GGPMTC	Bi;BCA;CCDB;GIP;Mem;Met
Bcat2	11.4306	10.2596	8.82961	9.24254	9.57043	9.59258	9.75275e-09	J	Negative	P1	OMPFAA	BCA;CCDB;Met
Vps36	11.572	10.9084	9.3522	9.22637	9.42	9.13907	9.87412e-09	C1;J;N	Negative	P1;P4;P60	VTSC	Bi;GIP;LT;Mem;Or
Thra	12.2339	11.1896	10.225	10.4206	10.4885	9.33473	9.89561e-09	C1	Negative	P60	Unclassified	Bi;BRB;BCA;CPGD;CCDB;DPR;EPRSS;GIP;LT
Amotl2	11.3512	12.8628	9.09804	9.06841	8.97983	8.37886	9.96818e-09	C1	Negative	P60
Fer1l6	2.05664	4.02225	8.15708	8.18218	8.66218	9.5337	9.99831e-09	D;U	Positive	P1;P60	Unclassified	Bi;LT;Mem
Cyfip2	11.091	11.7287	13.0554	13.286	13.2084	13.5201	1.00059e-08	D;K;U	Positive	P1;P4;P60	Unclassified	ACAM;Bi;CCDB;IS;SP
B4galt5	8.59985	10.0614	11.4903	11.1004	10.8939	10.1385	1.00207e-08	D	Positive	P1	Unclassified	Bi;BCA;Met;Or
Pola1	11.3156	11.0244	8.5756	9.18235	8.92477	7.54884	1.00968e-08	C1	Negative	P60	Unclassified	Bi;CPGD;CCDB;GIP;Mem;Met
Pyroxd2	5.6026	8.37243	9.43523	9.6989	9.77807	9.81949	1.0169e-08	D	Positive	P1	OOMA	BCA;Met
Gnl3	11.3962	10.586	9.06454	9.14915	9.09437	9.14053	1.02279e-08	C1;J	Negative	P1;P60	GGA	Bi;BRB;BCA;CPGD;CCDB;GIP;Mem
Rbbp9	10.9048	10.2909	8.30134	7.94008	7.88194	8.32453	1.02948e-08	C1;J;N	Negative	P1;P4;P60	Unclassified	Bi;BRB;BCA;CCDB;GIP;Or
Gm11223	11.9006	11.1483	10.2239	9.93879	9.85717	7.98037	1.02948e-08	C1	Negative	P60
Aurka	10.9622	9.98083	8.74224	8.50046	8.36324	7.3852	1.03139e-08	C1	Negative	P60	PTSKA	Bi;BRB;BCA;CPGD;CCDB;DPR;GIP;LT;Met;SP
Znfx1	9.25687	10.3914	11.4994	11.3716	11.4907	11.4937	1.03399e-08	D;U	Positive	P1;P60	Unclassified	Bi;BCA;GIP
Pipox	9.25587	7.86228	2.44662	5.33965	6.06108	0	1.03539e-08	C1	Negative	P60	OOMA;OMPFAA	Bi;BCA;CCDB;Met;Or
Nphs1	10.2158	8.75535	5.41156	7.58661	8.49918	1.33333	1.04908e-08	C1	Negative	P60	Unclassified	DPR;EPRSS;Mem;Met;Or
Rnf112	2.32	8.34	7.81	7.97	7	7.81	1.05178e-08	A	Positive	E15.5_Ngn3_Het	GGA	Bi;BCA;GIP
Cdc6	10.4898	9.37458	6.29518	8.1836	7.35616	7.11039	1.05284e-08	C1;J	Negative	P1;P60	Unclassified	CPGD;CCDB;GIP;Met
Lrp3	6.49849	8.44009	9.7554	9.96155	10.4647	10.7018	1.06158e-08	D	Positive	P1	Unclassified	Bi
Piezo1	10.5925	10.0087	7.32487	7.94272	7.86341	3.2049	1.06819e-08	C1	Negative	P60	ITH;MPIC	ACAM;BRB;CCDB;EPRSS;LT;Mem;Or
Parp1	13.1938	12.5095	11.0198	11.1782	11.1329	10.8367	1.07027e-08	C1;J	Negative	P1;P60	IPS;PTSKA	Bi;BCA;Di;EPRSS;GIP;LT;Mem;Met
Jag2	7.92161	8.39023	10.7413	11.5453	10.4853	10.7528	1.07591e-08	D;K	Positive	P1;P4	Unclassified	DPR;IS;Mem
Sorbs3	10.1956	9.72146	5.94306	6.60987	7.03413	2.74294	1.07777e-08	C1	Negative	P60	Unclassified	ACAM;Bi;CCDB;EPRSS;GIP;Met;SP
Uchl5	10.928	10.1118	8.04238	8.27428	8.19969	8.77145	1.07925e-08	J;T	Negative	P1;P12	Unclassified	Bi;BCA;CCDB;DPR;GIP;Met
Gstm2	10.2358	8.98639	6.23934	6.4196	7.45549	6.73695	1.09073e-08	C1;J	Negative	P1;P60	OOMA	Bi;BCA;Di;Met
Golga7b	0.861654	6.24531	7.54573	7.71826	7.48566	8.02099	1.09596e-08	D	Positive	P1	Unclassified	Mem
Tnik	6.81941	9.10198	10.1414	10.1815	10.3926	9.96316	1.09859e-08	D	Positive	P1	GGA;PTSKA	Bi;BCA;CCDB;DPR;EPRSS;GIP;Met;Or
Rpl22	12.923	12.4908	11.1999	10.5978	10.7289	10.2638	1.09912e-08	C1;J;N	Negative	P1;P4;P60	Unclassified	ACAM;Bi;CCDB;DPR;GIP;IS;Met;Or
Gm10169	10.7126	9.5281	8.22481	7.98442	7.75677	7.78665	1.10794e-08	J	Negative	P1
Nhp2	10.4787	9.59054	7.25228	7.09614	7.44934	6.603	1.10929e-08	C1;J	Negative	P1;P60	Unclassified	GIP
Enpp2	12.4834	12.0959	15.0238	14.7885	15.5388	14.6053	1.11226e-08	D;O	Positive	P1;P12	Unclassified	Bi;Mem;Met
Anks6	7.37294	10.0512	10.6132	10.4913	10.3023	8.86977	1.12499e-08	D;O	Positive	P1;P12	Unclassified	Bi;CCDB
Adgb	4.16728	8.49863	8.88466	9.05665	9.00513	6.49983	1.13793e-08	D;O	Positive	P1;P12	Unclassified	Bi;CCDB;LT;Met
Tmem171	8.65055	9.84787	1.70976	2.9183	2.68146	0	1.13835e-08	C1	Negative	P60
Fam83b	10.162	9.12217	6.73075	6.49812	6.8407	4.70276	1.13898e-08	C1	Negative	P60
Adcy1	10.3642	9.42557	8.96349	7.10831	5.41136	2.21462	1.14315e-08	C1	Negative	P60	Unclassified	DPR;EPRSS
Otoa	0.333333	5.67115	9.0979	8.20886	5.49475	6.97378	1.14561e-08	D	Positive	P1	Unclassified	Mem
Cebpa	9.6722	8.63496	4.34079	5.248	6.13776	4.9335	1.171e-08	C1;J;T	Negative	P1;P12;P60	Unclassified	Bi;BRB;BCA;CPGD;CCDB;DPR;Di;EPRSS;GIP;IS;Met
Isg20	6.5557	8.13641	9.93511	9.99983	9.9705	11.531	1.17751e-08	U	Positive	P60	Unclassified	Bi;BCA;EPRSS;GIP;Met
Rpl13a	14.6727	14.1153	12.8123	12.0266	12.3481	11.8543	1.17784e-08	C1;J;N	Negative	P1;P4;P60	Unclassified	BRB;BCA;CCDB;DPR;EPRSS;GIP;IS;Mem;Met
Kif20b	10.9915	10.2314	8.7893	8.60275	8.382	6.71714	1.18234e-08	C1	Negative	P60	Unclassified	ACAM;Bi;BCA;CPGD;CCDB;DPR;GIP;LT
Zfp36l2	11.8428	11.4306	9.23925	9.85215	9.87227	9.36215	1.18408e-08	C1;J	Negative	P1;P60	Unclassified	Bi;CCDB;DPR;GIP;IS;Met
Mrgpre	5.46486	7.86392	9.63112	9.66044	9.53002	9.9022	1.19322e-08	D	Positive	P1	GGA	EPRSS;Mem
St8sia5	0	4.23116	7.06935	8.01794	8.27196	7.96569	1.19464e-08	D	Positive	P1	Unclassified	BCA;Mem
Prepl	10.2005	10.9924	12.1764	12.2058	11.911	13.1742	1.1957e-08	U	Positive	P60	Unclassified	CCDB;Met
Cdh4	5.86344	7.51139	9.92132	10.4142	9.44589	10.0268	1.20789e-08	D;U	Positive	P1;P60	CMP	ACAM;Bi;CPGD;CCDB;DPR;Mem
Tmx4	9.73223	10.8411	11.3107	11.8639	11.804	12.4238	1.20856e-08	D;U	Positive	P1;P60	OOMA	BRB;BCA;EPRSS;Mem;Met;Or
Sgk1	10.6363	9.44556	6.8838	7.48927	9.28036	5.47577	1.21273e-08	C1	Negative	P60	PTSKA	BCA;EPRSS;LT;Met;Or
Usp18	3.69227	8.34055	7.93944	8.39443	8.00572	9.84867	1.21953e-08	U	Positive	P60	Unclassified	Bi;BCA;EPRSS;Met
Esyt1	10.1855	10.7939	12.2941	12.2969	12.23	12.3195	1.22362e-08	D	Positive	P1	Unclassified	Bi;Mem
Nr1d1	6.76349	6.48007	10.6335	10.6427	10.1973	10.8463	1.23326e-08	D;U	Positive	P1;P60	OOMA	Bi;BRB;BCA;DPR;EPRSS;GIP;IS;Met;Or;SP
Dnaic1	0.53	6.2	7.23	7.74	7.44	7.89	1.2446e-08	A;D	Positive	E15.5_Ngn3_Het;P1	Unclassified	ACAM;Bi;BCA;CCDB;Met
Hemgn	7.86645	4.98582	1.05664	2.9183	0.528321	0	1.24502e-08	C1	Negative	P60	Unclassified	Bi
Gtse1	10.4172	9.33302	7.49141	7.50743	7.18175	5.7364	1.24675e-08	C1	Negative	P60	Unclassified	Bi;CCDB;EPRSS;Mem
Cachd1	9.87886	8.50702	5.7103	6.21175	7.02435	3.02561	1.24873e-08	C1	Negative	P60	ITH	LT;Mem
A130066N16Rik	2.52832	5.47222	8.0524	8.11952	8.37573	9.61767	1.26089e-08	U	Positive	P60
Slc4a7	10.3651	11.1304	12.6945	12.4871	12.2712	11.9023	1.26109e-08	D;K	Positive	P1;P4	ITH;MPIC	DPR;LT;Mem
Actl6b	0.33	6.7	7.42	7.16	7.18	7.91	1.28865e-08	A;D;U	Positive	E15.5_Ngn3_Het;P1;P60	Unclassified	Bi;BCA;CCDB;DPR;GIP
Pdx1	11.4199	12.4706	13.5018	13.6822	13.2502	13.097	1.29208e-08	D;K;O	Positive	P1;P12;P4	GGPMTC;IPS;VTSC	Bi;BRB;BCA;CPGD;CCDB;DPR;Di;EPRSS;GIP;LT;Met
Clu	14.2417	13.6035	11.3657	12.1258	12.4502	12.1303	1.29937e-08	C1;J	Negative	P1;P60	Unclassified	Bi;BCA;CPGD;CCDB;DPR;EPRSS;GIP;Mem;Met
Nr1d2	9.1429	9.26687	11.7251	11.588	11.4093	11.5179	1.30705e-08	D	Positive	P1	Unclassified	Bi;BRB;BCA;DPR;EPRSS;GIP;Met
Mreg	5.13077	8.42977	8.94137	9.56637	9.73986	8.33957	1.30996e-08	D;O	Positive	P1;P12	Unclassified	Bi;CCDB;DPR;LT
Bhlha15	12.8596	11.3601	9.85433	11.3058	11.488	11.8849	1.31262e-08	Singleton	Negative	P1
Tacc3	11.3941	10.7221	9.60579	9.16233	9.05767	7.74231	1.31296e-08	C1	Negative	P60	OOMA	Bi;CPGD;CCDB;DPR;EPRSS;GIP;LT
Adh1	6.07477	6.73428	9.56476	9.94692	10.681	10.7268	1.32134e-08	D;O;U	Positive	P1;P12;P60	OOMA;OMPFAA	Bi;BCA;CCDB;EPRSS;Met
Rpsa-ps10	13.3282	12.4441	11.3125	11.0705	11.4647	11.276	1.32255e-08	J;N	Negative	P1;P4	Unclassified	CCDB;GIP
Mtmr7	9.21963	10.6854	11.4575	11.2652	11.2813	11.1788	1.32472e-08	D	Positive	P1	Unclassified	Bi;BCA;CCDB;Mem;Met
Rab3gap2	10.4857	11.0057	12.7499	12.6168	12.5343	12.2483	1.33164e-08	D	Positive	P1	Unclassified	CCDB;Mem
Cenpa	10.9472	10.0708	9.19687	8.42791	8.21388	6.08089	1.33317e-08	C1	Negative	P60	Unclassified	Bi;CPGD;CCDB;GIP;LT
Rcan3	10.9373	11.8501	12.9868	13.0171	12.9743	12.5543	1.3341e-08	D	Positive	P1	CMP	Bi;EPRSS
Jazf1	6.01	9.02	9.85	9.97	9.55	9.06	1.33617e-08	A;D	Positive	E15.5_Ngn3_Het;P1	Unclassified	Bi;BCA;CCDB;GIP
Rbm38	9.95325	8.81785	5.74936	5.99885	7.03174	4.44884	1.33707e-08	C1	Negative	P60	Unclassified	Bi;CPGD;CCDB;DPR;EPRSS;GIP
Adam22	7.44433	8.74611	10.1337	10.564	11.02	10.4554	1.34193e-08	D;O;U	Positive	P1;P12;P60	Unclassified	Bi;BRB;BCA;Mem;Met
Sparc	12.2828	12.7035	9.68871	10.4406	11.038	6.14283	1.3437e-08	C1	Negative	P60	VTSC	ACAM;Bi;CCDB;DPR;EPRSS;GIP;IS;LT;SP
Spdl1	10.2009	9.15381	6.9276	6.80457	6.78395	5.26369	1.3499e-08	C1	Negative	P60	Unclassified	Bi;CPGD;CCDB;GIP;LT
M5C1000I18Rik	3.15314	5.62442	9.02779	8.7808	8.51292	8.07846	1.35327e-08	D	Positive	P1
Srgap2	11.2711	11.2083	8.89002	8.72722	8.6927	7.76998	1.36062e-08	C1;J	Negative	P1;P60	GGA	ACAM;Bi;BRB;BCA;CCDB;DPR;EPRSS;GIP;Mem;Or;SP
Wdr43	12.0108	11.2982	10.0404	10.0037	9.97897	9.59116	1.36064e-08	C1;J	Negative	P1;P60	Unclassified	Bi;GIP
Tubb2a	8.86706	10.6045	10.9034	11.3068	10.6663	11.4796	1.36409e-08	D;U	Positive	P1;P60	GGA	Bi;BCA;CCDB
Sepsecs	10.1587	10.951	12.3685	12.3042	12.3985	11.1632	1.37758e-08	D;O	Positive	P1;P12	Unclassified	Bi;BCA;CCDB;GIP;Met
Nup85	11.7607	11.062	9.59942	9.78023	9.72189	9.30599	1.3891e-08	C1;J;N	Negative	P1;P4;P60	GGPMTC	Bi;BRB;CPGD;CCDB;EPRSS;GIP;IS;LT;Mem;Met
Twsg1	11.4328	12.7079	13.5928	13.3821	13.0813	13.3851	1.39027e-08	D;U	Positive	P1;P60	Unclassified	Bi;BRB;DPR;EPRSS;GIP;Or;SP
Kif5c	5.45544	8.13619	9.32577	9.49252	9.19248	10.6113	1.40527e-08	D;U	Positive	P1;P60	Unclassified	ACAM;Bi;BCA;CCDB;EPRSS;GIP;LT
Setd8	11.74	11.2871	9.73589	9.65429	9.4171	9.12198	1.411e-08	C1;J;N	Negative	P1;P4;P60	OMPFAA	Bi;BCA;EPRSS;GIP;Met
Lphn2	10.4666	9.88364	7.24021	7.17796	7.26115	5.97289	1.42353e-08	C1	Negative	P60	GGA	Bi;EPRSS;Mem
Mknk1	12.0318	11.2194	9.65542	10.1645	10.2575	9.90613	1.42387e-08	C1;J	Negative	P1;P60	PTSKA	Bi;BCA;CPGD;EPRSS;GIP;Mem;Met
Ncapd2	12.2642	11.3788	10.5629	10.5182	10.4377	8.79164	1.4284e-08	C1	Negative	P60	Unclassified	CPGD;CCDB;GIP;Mem
Cldn18	8.43252	7.20204	0.528321	3.86165	2.91494	0	1.43525e-08	C1	Negative	P60	Unclassified	ACAM;Bi;Mem
Gas1	10.0219	8.89583	7.47109	6.27669	6.44065	2.04309	1.43695e-08	C1	Negative	P60	Unclassified	ACAM;CPGD;DPR;EPRSS;Mem
Fbxw24	0	5.51631	7.43385	6.46638	7.76099	9.09257	1.44248e-08	U	Positive	P60
Abcg1	8.75	10.19	11.23	11.02	10.93	10.96	1.44776e-08	A;D	Positive	E15.5_Ngn3_Het;P1	ITH	Bi;BRB;BCA;CCDB;DPR;EPRSS;GIP;LT;Mem;Met;Or
Pcyt1b	7.66127	11.6179	10.2883	9.68006	10.066	8.69083	1.45633e-08	B	Positive	E15.5_Ngn3_Het
Hmgcll1	4.39989	7.44889	9.04981	8.99856	8.90122	9.15572	1.47715e-08	D	Positive	P1	Unclassified	Bi;BCA;CCDB;Mem
Afap1l1	9.88344	8.93929	5.62186	6.2823	6.1933	4.38388	1.47756e-08	C1	Negative	P60	Unclassified	ACAM;Bi;CCDB;GIP;Mem
Dnajb9	9.94896	10.3809	11.5108	12.1321	11.8549	13.6776	1.47946e-08	U;V	Positive	P60	Unclassified	CCDB;Or
Igf2bp3	10.9773	10.6899	9.27328	8.96559	7.60299	0	1.48458e-08	B1	Negative	P60	Unclassified	Bi;GIP;LT
Rps15	13.7434	13.038	11.7898	11.4547	11.675	11.489	1.50086e-08	C1;J;N	Negative	P1;P4;P60	Unclassified	Bi;CCDB;DPR;GIP;LT;Mem;Met
Rplp2	12.2491	11.7635	10.3526	9.98344	10.1107	10.2367	1.50247e-08	C1;J;N	Negative	P1;P4;P60	Unclassified	CCDB;GIP;Mem;Met;Or
Slc41a1	11.6767	10.7342	9.54885	9.63231	10.1276	8.67577	1.50299e-08	C1	Negative	P60
Atp6v0a1	10.19	11.41	12.13	11.98	12.03	12.26	1.50404e-08	A;D;U	Positive	E15.5_Ngn3_Het;P1;P60	IPS;ITH;OOMA;VTSC	Bi;DPR;Di;EPRSS;GIP;IS;LT;Mem;Met;Or
Proser2	10.2338	9.42815	6.75156	7.43518	7.21795	2.2049	1.50911e-08	C1	Negative	P60
Stab1	10.4083	12.192	7.16284	8.35284	7.27253	3.62806	1.52653e-08	C1	Negative	P60	Unclassified	Bi;DPR;Mem
Bok	10.0852	8.69451	4.94612	7.06614	7.91478	5.3138	1.52986e-08	C1;J	Negative	P1;P60	Unclassified	CPGD;Mem;Met
Gpt2	11.1808	11.2942	8.81163	8.43408	8.11522	8.58792	1.5328e-08	C1;J	Negative	P1;P60	OMPFAA	Bi;BCA;CCDB;Met
Ptpru	6.73498	9.90321	10.0782	10.1059	10.1449	8.14123	1.53457e-08	O	Positive	P12	Unclassified	ACAM;Bi;DPR;LT;Mem;Met
Fam83f	9.87695	9.41772	5.3079	5.8471	6.83529	1.10731	1.55837e-08	C1	Negative	P60
Neurog3	8.11359	12.8371	6.07279	5.48072	5.35444	2.52832	1.56118e-08	Singleton	Negative	P60
Cry2	9.39084	10.4639	11.5613	11.5512	11.4771	11.2916	1.56304e-08	D;K;O;U	Positive	P1;P12;P4;P60	GGPMTC;ITH;VTSC	Bi;BRB;BCA;CCDB;EPRSS;GIP;LT;Met
Tapbp	9.77002	10.7244	11.7249	11.7785	11.9211	11.7375	1.56726e-08	D;U	Positive	P1;P60	Unclassified	Bi;CCDB;EPRSS;IS;Mem;Met;Or
Nop58	12.3797	11.8703	10.3648	10.3441	10.294	10.1913	1.56999e-08	C1;J	Negative	P1;P60	Unclassified	Bi;CCDB;GIP;LT;Mem
Pole	10.9955	10.2412	8.07436	9.08253	8.76626	7.016	1.57006e-08	C1	Negative	P60	Unclassified	Bi;CPGD;CCDB;DPR;Di;GIP;Mem;Met
Gm10800	9.7215	9.63967	4.6662	4.75992	5.26263	4.70944	1.58211e-08	J	Negative	P1
Aqp8	8.88963	7.07076	0.666667	4.69825	6.3362	0	1.58742e-08	A1;C1	Negative	P60	ITH	EPRSS;LT;Mem;Or
Atp1a2	9.77464	8.9991	4.33322	6.12956	7.00752	2.25163	1.59214e-08	C1	Negative	P60	IPS;ITH	ACAM;Bi;BRB;BCA;CCDB;EPRSS;LT;Mem;Or;SP
Acvr1c	8.08425	10.2519	11.2621	10.4086	10.539	9.28536	1.59777e-08	D;E;O	Positive	P1;P12	Unclassified	ACAM;Bi;BCA;DPR;EPRSS;Mem
Hba-a1	11.5249	10.6893	9.70912	9.97498	9.33411	6.52492	1.60564e-08	C1	Negative	P60	OOMA;VTSC	Bi;CCDB;Di;LT;Met
Eef1g	13.3773	12.8102	11.6639	11.0396	11.0631	11.3803	1.60583e-08	C1;J;N	Negative	P1;P4;P60	Unclassified	Bi;EPRSS;GIP;Mem;Or
Amph	2.77398	6.15181	7.58142	7.98894	8.3181	10.0701	1.61108e-08	D;U	Positive	P1;P60	VTSC	ACAM;Bi;CCDB;LT;Mem;Or;SP
Prss3	9.93134	8.11812	6.46536	13.2473	12.6536	6.43043	1.61622e-08	Predicted_contaminant
Dtymk	11.2608	10.6039	8.80468	9.09457	9.10928	8.55836	1.62392e-08	C1;J	Negative	P1;P60	Unclassified	Bi;BCA;CCDB;DPR;EPRSS;Mem;Met
Srd5a1	9.55505	8.51587	4.72664	5.45918	5.96885	3.4136	1.63773e-08	C1	Negative	P60	OOMA	BCA;DPR;Mem;Met
Cym	9.48382	8.35808	2.05664	5.95447	5.77103	6.13247	1.64244e-08	J	Negative	P1
Itm2a	9.93247	8.71454	6.46281	6.35152	7.10733	1.99243	1.64256e-08	C1	Negative	P60	Unclassified	Bi;Mem
Rps11	13.5733	13.1712	11.7193	11.2052	11.4039	11.2019	1.65389e-08	C1;J;N	Negative	P1;P4;P60	Unclassified	Bi;CCDB;GIP;Mem;Met;Or
Mapk13	10.5095	9.9583	7.649	7.57452	7.35039	5.02443	1.66896e-08	C1	Negative	P60	GGA;PTSKA	Bi;BCA;CPGD;DPR;Di;EPRSS;GIP;IS;Met
Anln	11.2988	10.5887	9.39261	9.28209	9.07412	7.04561	1.6863e-08	C1	Negative	P60	Unclassified	Bi;CPGD;CCDB;DPR;GIP
Psrc1	9.88829	8.87557	6.30861	5.98485	6.34806	4.10505	1.6897e-08	C1	Negative	P60	PTSKA	Bi;BCA;CPGD;CCDB;GIP
Rps15a	12.586	12.2584	10.8879	10.271	10.4885	10.0663	1.69124e-08	C1;J;N	Negative	P1;P4;P60	Unclassified	CPGD;CCDB;EPRSS;GIP;Mem;Met;Or
D17H6S56E-5	11.6382	10.9796	8.81808	9.75841	10.0325	9.16241	1.69405e-08	J	Negative	P1
Rfc4	10.4543	9.64412	7.41407	7.46733	7.24953	6.55779	1.69459e-08	C1	Negative	P60	Unclassified	Bi;BCA;CPGD;GIP
Unc5a	6.3	9.44	9.6	9.63	10.09	9.24	1.70558e-08	A;O	Positive	E15.5_Ngn3_Het;P12	Unclassified	CPGD;CCDB;DPR;EPRSS;Mem
Polr1b	11.0145	10.1	8.58878	8.62401	8.83849	8.32174	1.70781e-08	C1;J	Negative	P1;P60	Unclassified	Bi;CCDB;DPR;GIP;Met
Pde1c	7.67491	11.383	10.5923	9.90589	9.37936	9.52401	1.71297e-08	B	Positive	E15.5_Ngn3_Het
Gm10110	12.3613	11.483	10.8868	10.2709	10.1661	10.256	1.7172e-08	J	Negative	P1	Unclassified	Bi
Cacna1d	10.0482	10.7944	12.3065	12.245	12.0652	11.2201	1.72346e-08	D;K;O	Positive	P1;P12;P4	CMP;IPS;ITH;MPIC	ACAM;Bi;BRB;CCDB;Di;EPRSS;LT;Mem;SP
Ipo5	13.6047	12.9397	11.6786	11.5017	11.4676	11.2856	1.73511e-08	C1;J	Negative	P1;P60	GGA	Bi;EPRSS;GIP;LT;Mem;Or
Lgr5	8.90531	7.43799	4.19311	3.92712	4.69582	0.861654	1.74858e-08	C1	Negative	P60	GGA;VTSC	Bi;DPR;EPRSS;Mem
Pm20d1	9.13135	8.12261	2.44364	4.95967	5.95803	0	1.74913e-08	C1	Negative	P60	Unclassified	Bi;BCA;CPGD;EPRSS;Met;Or
Ak2	11.9841	11.4038	9.90244	10.1155	10.0542	9.28836	1.76193e-08	C1;J	Negative	P1;P60	OOMA	Bi;BCA;CCDB;DPR;EPRSS;Mem;Met;Or
Ccnf	10.5518	9.6527	8.05309	7.97005	7.53623	5.56678	1.78679e-08	C1	Negative	P60	Unclassified	Bi;BCA;CPGD;CCDB;DPR;GIP;Met
Gm281	0	5.11882	8.65267	7.34432	6.77614	6.90547	1.78971e-08	D	Positive	P1	CMP	ACAM;Bi;Mem
Adam10	13.2747	12.8937	11.788	11.1425	10.8229	10.5693	1.81464e-08	C1;J;N;T	Negative	P1;P12;P4;P60	PTSKA	ACAM;Bi;BRB;BCA;CPGD;CCDB;DPR;Di;EPRSS;GIP;IS;LT;Mem;Met;Or
Amy2a3	13.9137	13.0635	9.29323	14.0407	15.0989	9.762	1.81987e-08	Predicted_contaminant
Atic	12.3372	11.568	10.3841	10.4444	10.3345	10.2755	1.8263e-08	C1;J	Negative	P1;P60	OMPFAA	Bi;BCA;CCDB;DPR;EPRSS;Mem;Met;Or
1810010K12Rik	8.5685	6.48105	0	3.72226	5.88948	0	1.84963e-08	Singleton	Negative	P1
Smpd3	8.04	10.03	10.67	10.83	10.38	10.26	1.8503e-08	A;D	Positive	E15.5_Ngn3_Het;P1	VTSC	Bi;BRB;BCA;DPR;EPRSS;LT;Mem;Met;Or
Topbp1	12.1185	11.5583	10.0676	10.4595	10.0927	9.2582	1.86429e-08	C1	Negative	P60	Unclassified	Bi;CPGD;CCDB;EPRSS;GIP;Mem
Pbld1	9.67397	8.74179	5.42977	5.45356	6.30482	3.34539	1.86747e-08	C1	Negative	P60	PTSKA	ACAM;Bi;BRB;BCA;CPGD;CCDB;DPR;EPRSS;LT;Met;Or;SP
Itpripl1	9.67754	9.12309	5.37414	5.76647	5.59826	2.54795	1.87866e-08	C1	Negative	P60	Unclassified	Mem
Lrrk1	10.0692	9.49313	5.60328	6.38231	7.16695	4.53877	1.88926e-08	C1	Negative	P60	GGA;PTSKA	Bi;BCA;CCDB;EPRSS;Met
Ctso	8.27	9.95	10.63	10.9	10.86	10.36	1.89936e-08	A;D	Positive	E15.5_Ngn3_Het;P1	Unclassified	BCA;Met;Or
Hs6st3	0.67	6.35	7.45	7.89	7.31	6.19	1.90123e-08	A;D	Positive	E15.5_Ngn3_Het;P1	Unclassified	BCA;Mem;Met
Igf2bp1	10.7469	10.7413	9.29172	7.77315	6.68573	0	1.91202e-08	B1	Negative	P60	Unclassified	Bi;BRB;CCDB;GIP;LT;Mem
Fgfr4	10.7157	10.9515	8.3408	7.76355	7.37832	4.06533	1.91441e-08	C1	Negative	P60	GGA;IPS;ITH;PTSKA;VTSC	ACAM;Bi;BRB;BCA;CPGD;CCDB;DPR;Di;EPRSS;GIP;IS;LT;Mem;Met;Or
Sdk1	6.15404	9.55366	10.2362	9.81452	9.61065	6.85261	1.91951e-08	B;E	Positive	E15.5_Ngn3_Het;P1	Unclassified	ACAM;Bi;Mem;Or
Dnmt1	12.7688	12.1902	10.9196	11.1796	10.7702	9.45507	1.92895e-08	C1	Negative	P60	OMPFAA	Bi;BCA;CPGD;CCDB;Di;EPRSS;GIP;Met
Trpm2	4.13077	7.30553	9.02181	9.17485	8.63541	7.73635	1.93111e-08	D	Positive	P1	ITH;MPIC	BCA;LT;Mem;Met
Tgif2	10.0735	9.45399	6.37414	6.2978	6.63337	4.88294	1.9411e-08	C1	Negative	P60	PTSKA	DPR;Di;EPRSS;GIP
Lrrc36	1.26912	4.16728	7.91008	7.8762	8.28076	7.58303	1.95479e-08	D	Positive	P1
Rps24	12.8467	12.6669	11.1924	10.3794	10.5431	10.7819	1.95644e-08	C1;J;N	Negative	P1;P4;P60	Unclassified	BRB;CCDB;GIP;Met
Serping1	5.4	9.71	9.7	8.86	8.99	7.54	1.95983e-08	A	Positive	E15.5_Ngn3_Het	Unclassified	BRB;EPRSS;Met;Or
Sox6	10.5252	10.6413	8.00158	7.16848	7.16147	2.26912	1.9607e-08	C1	Negative	P60	Unclassified	Bi;CCDB;DPR;EPRSS;GIP;IS
Crebrf	8.44035	9.88179	11.1229	10.4323	10.8096	11.1866	1.97693e-08	D;U	Positive	P1;P60	Unclassified	Bi;BCA;EPRSS;GIP;LT
Snhg11	4.14244	5.36716	7.61704	7.46399	9.88993	12.4484	1.9776e-08	V	Positive	P60
Tmed6	10.904	9.76536	7.2849	8.63926	9.83913	6.4712	1.98198e-08	C1	Negative	P60	Unclassified	LT;Mem;Or
Amy2a4	13.8043	13.0133	9.44909	14.2766	15.3216	9.39042	1.98955e-08	Predicted_contaminant
Rps27l	11.648	10.8628	9.7075	9.48959	9.62754	9.57386	1.99504e-08	C1;J;N	Negative	P1;P4;P60	Unclassified	Bi;BCA;CPGD;CCDB;GIP
D10Wsu102e	11.162	10.3643	8.95806	8.89181	8.91963	8.71274	2.00699e-08	J	Negative	P1
Eif4e3	5.97	8.9	9.81	9.75	9.51	8.94	2.01061e-08	A;D;O	Positive	E15.5_Ngn3_Het;P1;P12	Unclassified	BCA;CCDB;GIP;IS;Met
Prkce	8.8427	9.75289	11.1503	11.3536	11.3308	10.4211	2.02735e-08	D;O	Positive	P1;P12	GGA;IPS;ITH;OOMA;PTSKA;VTSC	ACAM;Bi;BRB;BCA;CPGD;CCDB;Di;EPRSS;GIP;IS;LT;Mem;Met;SP
Notch1	12.9677	11.8983	11.3305	11.1547	11.1934	10.1965	2.04724e-08	C1;T	Negative	P12;P60	OOMA	ACAM;Bi;BCA;CPGD;CCDB;DPR;Di;EPRSS;GIP;Mem
Tpi1	13.2389	12.6135	11.3215	11.1589	11.0463	11.3792	2.05734e-08	C1;J;T	Negative	P1;P12;P60	GGPMTC	Bi;BCA;CCDB;DPR;GIP;Met;Or
Ung	10.4125	9.27893	6.85819	8.32822	7.49277	6.21071	2.05932e-08	C1	Negative	P60	Unclassified	BCA;GIP;IS
Mis18bp1	10.5683	9.8341	7.85769	7.79411	7.85191	5.88814	2.06197e-08	C1	Negative	P60	Unclassified	Bi;CPGD;GIP
Gm6863	13.0951	12.5062	11.4577	10.9048	10.7785	11.1806	2.07288e-08	T	Negative	P12
Gm8186	11.1447	10.3194	9.11085	8.87791	8.89909	8.3457	2.07335e-08	C1;N	Negative	P4;P60	Unclassified	BCA;CCDB;GIP;Met
Gpx8	9.2309	8.65889	3.39989	4.85049	5.6821	0	2.0799e-08	C1	Negative	P60	OOMA	BCA;EPRSS;Mem;Met
Ncl	15.0285	14.3223	13.0132	12.6805	12.7226	12.3677	2.08e-08	C1;J;N	Negative	P1;P4;P60	Unclassified	Bi;CCDB;DPR;GIP;Mem;Or
Wdhd1	11.0185	10.2236	8.59161	9.0431	8.6674	7.71872	2.09117e-08	C1	Negative	P60	Unclassified	Bi;CCDB;GIP;Met;Or
Ajuba	9.70274	9.37515	5.01206	5.83156	6.22193	0.333333	2.09187e-08	C1	Negative	P60	GGA;OOMA;PTSKA	ACAM;Bi;BCA;CPGD;CCDB;DPR;EPRSS;GIP;LT;Mem;Met
Il6ra	7.47944	8.61054	10.381	10.461	11.0665	9.74647	2.10617e-08	D;O	Positive	P1;P12	Unclassified	Bi;BRB;EPRSS;Mem;Met
St8sia1	4.81981	4.66761	8.44331	10.0543	10.6119	8.83841	2.1264e-08	Q	Positive	P12
Gm5091	7.6816	6.03261	0	0.528321	0.528321	0	2.15905e-08	J	Negative	P1
Pde10a	4.04309	6.16563	8.12435	9.05157	8.95801	10.1261	2.17895e-08	D;U	Positive	P1;P60	Unclassified	Bi;BCA;CCDB;EPRSS;Met
Slc25a37	11.275	10.5258	9.30369	9.17433	9.02951	8.45255	2.18217e-08	C1;J	Negative	P1;P60	ITH	BRB;BCA;LT;Mem
Kit	11.5309	11.4285	10.6195	9.26143	8.80407	1.05664	2.18675e-08	B1;C1	Negative	P60	PTSKA	ACAM;Bi;BRB;CCDB;DPR;Di;EPRSS;GIP;IS;Mem;Met
Kif2c	10.4828	9.72821	8.17238	7.60598	7.17501	5.56678	2.20316e-08	C1	Negative	P60	Unclassified	ACAM;Bi;BRB;BCA;CPGD;CCDB;DPR;GIP;Mem;Met
Rhobtb1	8.96414	9.21917	10.7481	11.3759	11.6636	11.805	2.20573e-08	O;U	Positive	P12;P60	Unclassified	Bi;EPRSS;LT
Rps20	12.8018	12.2563	11.1114	10.6577	10.7934	10.4406	2.24207e-08	C1;J;N	Negative	P1;P4;P60	Unclassified	Bi;CCDB;GIP;Mem;Met;Or
2700094K13Rik	10.8365	10.1168	8.50614	8.18734	8.45039	7.45891	2.24967e-08	C1	Negative	P60	Unclassified	Bi;BRB;GIP
Prodh	9.59686	8.53134	5.56124	5.4126	5.99579	3.98594	2.24976e-08	C1;J	Negative	P1;P60	OOMA;OMPFAA	Bi;BCA;CCDB;Mem;Met
Igf2bp2	12.0792	11.9381	10.6717	10.3808	9.81954	4.677	2.25217e-08	B1;C1	Negative	P60	Unclassified	Bi;CCDB;GIP;LT
Fignl1	10.6765	10.0123	7.8391	8.46764	7.76965	6.58777	2.2578e-08	C1	Negative	P60	Unclassified	Bi;CPGD;CCDB;DPR;EPRSS;GIP;Met;Or
Upb1	5.05789	7.32277	9.05601	8.78171	9.6218	10.2702	2.25934e-08	D;U	Positive	P1;P60	OMPFAA	Bi;BCA;CCDB;Met;Or
Lima1	11.4517	10.862	9.21289	9.16222	9.37414	9.53	2.26324e-08	J;N	Negative	P1;P4	Unclassified	ACAM;Bi;BRB;CCDB;Mem
Eln	8.90574	7.48344	10.8231	12.1398	11.8302	0.666667	2.27263e-08	Singleton	Negative	P60
Tdrd1	7.85682	6.68083	1.3023	1.19499	0.333333	0	2.27407e-08	C1;J	Negative	P1;P60	Unclassified	Bi;CPGD;DPR;GIP
Ptma	13.663	13.0653	12.0785	11.7991	11.3403	10.7142	2.27812e-08	C1	Negative	P60	Unclassified	Bi;Di;GIP
Nop2	11.212	10.3906	9.26901	9.11978	8.89914	8.50268	2.3162e-08	C1	Negative	P60	Unclassified	Bi;BCA;GIP;Met
Gm14290	2.90475	5.89026	8.32648	8.03307	8.70421	7.9749	2.32848e-08	D	Positive	P1
Eef1d	12.5741	11.9166	10.7122	10.5553	10.5881	10.5981	2.3293e-08	C1;J;N;T	Negative	P1;P12;P4;P60	Unclassified	Bi;CCDB;Di;EPRSS;GIP
Cdkn1a	11.0923	12.2558	8.66064	8.72296	8.53372	8.74101	2.33481e-08	C1;J;T	Negative	P1;P12;P60	Unclassified	Bi;BRB;BCA;DPR;EPRSS;IS
Nek6	10.6554	10.2501	7.4302	7.58738	7.65372	8.29392	2.33824e-08	C1;J;T	Negative	P1;P12;P60	PTSKA	Bi;BCA;CPGD;CCDB;EPRSS;GIP;Met
Maoa	10.3493	9.41964	6.89248	7.08447	7.12572	8.18209	2.34623e-08	J;T	Negative	P1;P12	OOMA;OMPFAA	Bi;BRB;BCA;Mem;Met
Serbp1	13.8506	13.3959	11.9776	11.7881	11.6076	11.2964	2.35208e-08	C1;J	Negative	P1;P60	Unclassified	Bi;CCDB;GIP;Mem;Or
Dab2	9.43437	11.3605	4.85031	6.49922	5.70558	1.19499	2.35499e-08	C1	Negative	P60	PTSKA	ACAM;Bi;BCA;CPGD;DPR;EPRSS;LT;Mem;Met;Or
Dusp1	10.6036	11.4234	12.3485	13.2412	11.5919	13.2939	2.38213e-08	D;U	Positive	P1;P60	Unclassified	BCA;EPRSS
Tmsb10	11.4205	11.3615	9.57598	9.28611	8.93981	6.84248	2.40956e-08	C1	Negative	P60	Unclassified	Bi;CCDB;LT;Or
Chpf	9.62002	10.5078	11.3425	11.621	11.5891	12.3264	2.41745e-08	D;U	Positive	P1;P60	Unclassified	Bi;BCA;CCDB;Di;Mem;Met
Atp8a1	9.0367	9.55062	10.9922	11.0385	11.6156	11.9551	2.44584e-08	D;O;U	Positive	P1;P12;P60	Unclassified	ACAM;Bi;BRB;CCDB;LT;Mem;Or;SP
Prmt3	10.8293	10.4079	8.21253	7.99555	8.05115	8.35268	2.4572e-08	C1;J	Negative	P1;P60	Unclassified	Bi;BCA;CCDB;GIP;Met
Ngef	9.82261	8.78081	5.08498	6.45669	7.0004	4.49728	2.45905e-08	C1	Negative	P60	GGA;PTSKA	Bi;BCA;DPR;EPRSS;Mem;SP
Mob3b	10.065	9.19629	6.47413	6.38052	6.90269	5.90287	2.46411e-08	C1	Negative	P60	Unclassified	Bi
Stk39	11.0793	10.519	8.47289	8.7037	8.72703	9.07583	2.47103e-08	C1;J;T	Negative	P1;P12;P60	ITH;PTSKA	Bi;BCA;CCDB;EPRSS;GIP;LT;Mem;Met
Rnf130	9.54533	11.3903	11.4723	11.3126	10.952	11.7381	2.47396e-08	U	Positive	P60	Unclassified	Bi;BCA;Met
Mafg	10.1555	11.2932	12.2849	12.0202	11.7288	11.8795	2.47721e-08	D	Positive	P1	ITH	Bi;BRB;BCA;CPGD;DPR;GIP
Lrrc73	4.02225	7.04139	8.51825	8.75583	8.60686	9.1107	2.47981e-08	D	Positive	P1
Itgb6	9.26341	8.65779	5.37557	4.37857	4.56362	2.2049	2.48413e-08	C1	Negative	P60	IPS	ACAM;CCDB;DPR;Di;EPRSS;Mem;Or
Acsf2	9.48057	8.79072	4.44439	5.57755	6.35922	0.666667	2.48668e-08	C1	Negative	P60	OMPFAA	Bi;BCA;CCDB;Met
Ppil1	10.8868	10.1131	8.61175	8.71238	8.26097	7.76001	2.50478e-08	C1;J	Negative	P1;P60	Unclassified	Bi;BCA;GIP;Met;Or
Spta1	8.0354	5.29517	3.16395	4.09974	1	0	2.51673e-08	C1;T	Negative	P12;P60	Unclassified	BCA;CCDB;Mem
Gpr98	5.18406	8.35227	9.94473	9.39517	9.18631	6.35812	2.52483e-08	D;E	Positive	P1	Unclassified	ACAM;BRB;CCDB;DPR;EPRSS;Mem;Or
Pnliprp2	9.49218	8.0483	5.41891	11.7991	13.3013	5.30085	2.53256e-08	Predicted_contaminant
Sema3c	10.9914	10.7827	8.69218	8.71856	7.82072	7.84169	2.5326e-08	C1;T	Negative	P12;P60	Unclassified	ACAM;Bi;CCDB;DPR;EPRSS;Mem
Bex4	10.9939	10.2622	8.52816	8.49753	8.67796	8.98798	2.54479e-08	C1;J	Negative	P1;P60	Unclassified	CCDB;GIP
Gm572	6.08408	9.27719	10.0009	9.59526	9.15562	8.93739	2.5718e-08	D	Positive	P1
Heg1	7.8812	8.89635	11.081	10.6066	10.8951	9.19815	2.58249e-08	D	Positive	P1	Unclassified	ACAM;Bi;Mem
Cplx2	12.1498	13.5738	14.2447	14.1425	14.1478	13.1251	2.58386e-08	D;O	Positive	P1;P12	VTSC	ACAM;Bi;BRB;CCDB;DPR;EPRSS;LT;Mem;Or
Gdpd5	10.1309	9.1983	6.85715	7.22063	7.38378	3.16926	2.59047e-08	C1	Negative	P60	Unclassified	BCA;CCDB;DPR;EPRSS;Mem;Met;SP
Fam136a	10.9654	10.4921	8.70999	8.62017	8.20851	8.05841	2.59284e-08	C1	Negative	P60	Unclassified	CCDB
Wnk4	8.18556	10.2132	10.741	10.8693	10.3752	9.86939	2.60929e-08	D;O	Positive	P1;P12	ITH;PTSKA	Bi;BRB;BCA;DPR;EPRSS;LT;Met
H2-D1	10.2279	10.876	12.0771	12.1667	12.2581	12.2843	2.61289e-08	D;K;U	Positive	P1;P4;P60	IPS;VTSC	ACAM;Bi;Di;IS;LT;Mem;Or
Msh6	11.7965	11.1776	9.8057	10.0452	9.81525	9.13419	2.62036e-08	C1	Negative	P60	Unclassified	Bi;BCA;CPGD;CCDB;DPR;Di;EPRSS;GIP;IS;Mem;Or
Col9a3	9.9693	11.2184	5.90759	6.56181	7.103	2.44064	2.62311e-08	C1	Negative	P60	Unclassified	ACAM;BCA;CCDB;DPR;EPRSS
Atp6v1b2	11.1891	12.2918	13.3419	12.9906	12.7362	13.04	2.63256e-08	D;U	Positive	P1;P60	IPS;ITH;VTSC	ACAM;Bi;CCDB;DPR;Di;EPRSS;IS;LT;Mem;Met;Or
Nudt19	11.0396	10.6723	8.5128	8.48641	8.72886	8.44309	2.63989e-08	C1;J	Negative	P1;P60	Unclassified	Bi;BCA;CCDB;Met;Or
Spag5	10.9368	10.214	8.83009	8.70336	8.59537	7.02417	2.67052e-08	C1	Negative	P60	Unclassified	Bi;CPGD;CCDB;GIP
Braf	10.5511	11.6157	12.6524	12.2916	12.3854	11.9247	2.67135e-08	D;O	Positive	P1;P12	CMP;PTSKA;VTSC	ACAM;Bi;BRB;BCA;CPGD;CCDB;DPR;Di;EPRSS;GIP;IS;LT;Met
Ypel3	8.59	10.64	10.85	10.62	10.62	10.81	2.67944e-08	A	Positive	E15.5_Ngn3_Het	Unclassified	CPGD;GIP
Cpox	11.9575	10.9536	10.0109	10.2261	9.91001	10.4162	2.68326e-08	C1;J	Negative	P1;P60	Unclassified	BCA;Mem;Met
Bora	10.4528	9.55677	8.02073	7.83378	7.27039	6.10032	2.68922e-08	C1	Negative	P60	Unclassified	Bi;CPGD;LT
Pcna	11.8412	11.1422	9.66701	10.2198	9.74027	9.84356	2.70997e-08	C1;J;T	Negative	P1;P12;P60	Unclassified	Bi;BCA;CPGD;CCDB;Di;GIP;Met
Lrfn3	8.31129	9.64634	10.9298	10.8219	10.8447	10.1494	2.71811e-08	D	Positive	P1	Unclassified	ACAM;Bi;CCDB;Mem
Slc35g2	6.69164	8.72952	9.82187	10.2049	9.69682	10.56	2.72279e-08	D	Positive	P1	Unclassified	Mem;Or
Tomm40	11.4883	10.7386	9.37897	9.59599	9.45659	9.22141	2.73477e-08	C1;J	Negative	P1;P60	Unclassified	CCDB;LT;Mem;Or
Bop1	11.35	10.5163	9.07786	9.32372	9.38561	9.34894	2.74442e-08	C1;J	Negative	P1;P60	Unclassified	Bi;BRB;CPGD;GIP
Gm9531	12.3201	11.778	10.662	10.419	9.85081	10.6061	2.75266e-08	T	Negative	P12
Flna	12.954	13.1327	10.6707	11.2467	11.4728	8.92894	2.77675e-08	C1	Negative	P60	CMP;GGA;VTSC	ACAM;Bi;BRB;BCA;CPGD;CCDB;DPR;Di;EPRSS;GIP;IS;LT;Mem;Met;Or;SP
Trpm3	3.16926	5.84552	8.27788	8.71533	7.88464	9.00976	2.78135e-08	D	Positive	P1	ITH;MPIC	LT;Mem
Ppa1	11.3794	10.496	9.14325	9.25173	9.21152	10.0864	2.78716e-08	J;S	Negative	P1;P12	OOMA	Bi;BCA;GIP;Met;Or
Cdk18	10.5557	9.42242	7.16581	7.8343	7.97904	9.04364	2.79884e-08	J	Negative	P1	Unclassified	Met
Fign	9.21801	8.54933	3.62345	5.33445	5.67729	0.333333	2.80588e-08	C1	Negative	P60	Unclassified	Bi;BCA;CPGD;CCDB;GIP
Col11a1	8.44769	6.63972	2.69759	3.82304	4.4084	0	2.81682e-08	C1	Negative	P60	Unclassified	Bi;CCDB;DPR;Di;EPRSS;Met;SP
Ficd	8.38871	9.19994	10.6049	11.0661	10.883	11.182	2.83316e-08	D;U	Positive	P1;P60	Unclassified	Bi;BCA;Mem;Met
Trip13	9.85202	9.04915	6.37729	6.42242	6.05096	4.13946	2.83357e-08	C1	Negative	P60	Unclassified	Bi;BCA;CPGD;CCDB;DPR;GIP
Hspa1b	5.56138	7.41776	6.80291	10.5777	6.14365	13.9159	2.8383e-08	X	Positive	P60
Ddx21	12.6263	11.9616	10.731	10.8144	10.8636	10.0773	2.84448e-08	C1	Negative	P60	Unclassified	Bi;DPR;EPRSS;GIP;Mem;Met
Adk	11.5386	10.7559	8.87373	9.23245	9.89475	10.4649	2.86091e-08	C1;J	Negative	P1;P60	Unclassified	BCA;Met
Gucy2c	4.58545	6.91063	8.6052	9.39469	8.44654	10.235	2.86215e-08	D;U	Positive	P1;P60	PTSKA	Bi;BCA;EPRSS;Mem;Met;Or
Mdm1	8.79981	10.4975	11.5249	10.9223	10.48	10.3071	2.87146e-08	D	Positive	P1	Unclassified	CCDB
Gmnn	10.4558	9.50898	7.4855	8.00031	7.49706	7.07998	2.872e-08	C1;J	Negative	P1;P60	Unclassified	Bi;CPGD;CCDB;DPR;GIP
Ikzf4	6.8199	8.33077	10.0662	10.0893	10.2075	10.3701	2.87884e-08	D;U	Positive	P1;P60	Unclassified	Bi;GIP
Ephb2	10.8453	10.476	8.71723	8.6076	8.18376	4.76726	2.87909e-08	C1	Negative	P60	PTSKA	ACAM;Bi;BRB;DPR;EPRSS;Mem;Met;SP
Abca2	9.66053	10.505	11.4608	11.6573	11.837	11.6246	2.88013e-08	D;U	Positive	P1;P60	Unclassified	Bi;BRB;BCA;EPRSS;GIP;LT;Mem;Or
Pkib	4.10543	7.68125	9.15712	8.36589	7.99081	8.72218	2.88328e-08	D	Positive	P1	PTSKA	BCA;Met
Pacsin3	9.70396	9.00179	5.01034	6.09515	6.74126	2.88129	2.88925e-08	C1	Negative	P60	ITH;MPIC;VTSC	Bi;CCDB;LT;Mem;Met;Or
Rsl1d1	12.2014	11.6522	10.3364	10.1858	10.221	10.2271	2.8992e-08	C1;J	Negative	P1;P60	Unclassified	Bi;DPR;GIP;LT;Mem
Rhou	11.2175	11.2591	9.5532	8.70638	8.71916	5.31382	2.90124e-08	C1	Negative	P60	GGA	ACAM;Bi;BRB;CCDB;DPR;EPRSS;LT;Mem
E2f8	10.4664	9.50743	7.7246	8.45072	7.51454	5.21499	2.9048e-08	C1	Negative	P60	Unclassified	Bi;BCA;CPGD;CCDB;DPR;GIP;Met
Gm5864	9.11202	7.78949	4.62114	4.86376	5.73041	0.333333	2.90742e-08	C1	Negative	P60
Pprc1	11.7803	10.8896	9.84708	10.1549	9.93403	9.21112	2.9117e-08	C1	Negative	P60	Unclassified	Bi;BCA;GIP
Gm11478	11.7871	10.9547	10.2038	9.61341	9.98335	9.42181	2.92959e-08	C1	Negative	P60
Alcam	12.2832	12.1071	10.2889	10.6332	10.3654	8.83436	2.96475e-08	C1	Negative	P60	Unclassified	ACAM;Bi;DPR;Mem;Or;SP
Tfrc	13.4355	12.5613	11.5497	11.4126	11.8575	10.9157	2.97041e-08	C1;J	Negative	P1;P60	ITH;OOMA	Bi;BRB;CCDB;EPRSS;GIP;IS;LT;Mem;Or;SP
Ddx20	10.9348	10.2843	8.74074	8.53189	8.51367	8.07448	2.97911e-08	C1;J;N;T	Negative	P1;P12;P4;P60	Unclassified	Bi;BCA;CPGD;CCDB;DPR;GIP;Mem;Met
Tk1	10.5065	9.5964	7.18351	8.10963	8.12562	6.85896	2.98651e-08	C1;J	Negative	P1;P60	Unclassified	Bi;BCA;CPGD;CCDB;DPR;EPRSS;GIP;Met
Cmtm7	9.39542	8.77436	4.46758	4.71137	5.61537	4.60067	3.01298e-08	C1;J	Negative	P1;P60	Unclassified	ACAM;CCDB;EPRSS;Mem
Tmem63c	0.333333	5.16056	7.00038	7.11473	7.06117	9.14592	3.01729e-08	D;U	Positive	P1;P60	MPIC	LT;Mem
Gpc6	10.016	8.99252	7.35333	6.66946	6.3285	4.93813	3.02451e-08	C1	Negative	P60	OMPFAA	ACAM;Bi;BCA;CCDB;DPR;Di;EPRSS;GIP;Mem;Met;Or
Sh2d5	4.85	9.56	9.49	9.08	7.3	7.3	3.05246e-08	A	Positive	E15.5_Ngn3_Het	Unclassified	Bi
Ammecr1	10.4491	9.84157	7.66045	7.55281	7.29455	6.69721	3.06162e-08	C1	Negative	P60	Unclassified	Bi
Slc25a53	7.22	10.3	10.48	10.02	9.75	8.5	3.09842e-08	A	Positive	E15.5_Ngn3_Het	Unclassified	Mem
Eftud2	12.1873	11.7044	10.3565	10.3482	10.1911	9.74724	3.11324e-08	C1;J	Negative	P1;P60	GGA	Bi;BCA;EPRSS;GIP;Mem
Plk4	10.3986	9.72145	7.55485	7.58491	7.37589	6.08936	3.15252e-08	C1	Negative	P60	PTSKA	Bi;BCA;CPGD;CCDB;DPR;GIP;Mem;Met
Pmf1	10.4311	9.50763	7.56365	7.69145	7.81533	6.65075	3.17067e-08	C1;J	Negative	P1;P60	Unclassified	Bi;BCA;CPGD;GIP
Tmem117	4.76257	6.78903	9.0404	9.38292	8.80761	9.59738	3.19468e-08	D;U	Positive	P1;P60	Unclassified	Mem;Or
Map1a	6.42	10.41	9.84	9.77	8.7	8.39	3.1958e-08	A	Positive	E15.5_Ngn3_Het	Unclassified	Bi;BCA;CCDB;SP
Rpl10a-ps1	14.0827	13.3242	12.4673	11.7859	12.0023	11.8281	3.22456e-08	N	Negative	P4
Dusp26	2.37643	4.97974	8.27436	7.69838	8.75419	7.13038	3.22975e-08	D;O	Positive	P1;P12	Unclassified	ACAM;BCA;CCDB;EPRSS;GIP;Met;Or
Cct4	12.9054	12.571	11.1843	10.7706	10.7502	10.8466	3.23118e-08	C1;J;N	Negative	P1;P4;P60	Unclassified	Bi;BCA;CCDB;DPR;GIP;Met;Or
Atp10d	9.60224	8.78319	4.95708	5.98476	6.59336	2.83062	3.23425e-08	C1	Negative	P60
Emilin2	8.39134	8.65353	0.935785	2.10731	3.41913	1	3.24058e-08	C1;J	Negative	P1;P60	Unclassified	ACAM;Bi;CCDB
Rora	8.05739	8.23086	10.8325	10.8002	10.9489	10.7032	3.25363e-08	D;P;U	Positive	P1;P12;P60	OOMA	Bi;BRB;BCA;DPR;EPRSS;GIP;IS;Met;Or
Sv2b	2.57142	6.59091	7.34807	8.21072	8.1056	7.50816	3.25682e-08	D	Positive	P1	VTSC	ACAM;LT;Mem;Or
Foxm1	11.374	10.49	9.56566	9.71838	9.51943	7.25872	3.29403e-08	C1;T	Negative	P12;P60	OOMA	Bi;BCA;CPGD;CCDB;DPR;EPRSS;GIP;Met
Gdf3	3.16395	1.79744	8.90778	7.60913	7.4698	12.153	3.3042e-08	V	Positive	P60
Spsb1	5.10965	8.84598	9.66611	9.41051	8.62553	6.17933	3.30592e-08	B;E;L	Positive	E15.5_Ngn3_Het;P1;P4	Unclassified	ACAM;Bi;BRB;CCDB;EPRSS;Met
Gm4737	11.5942	10.4827	9.32525	9.94052	10.2082	9.12202	3.31438e-08	C1;J	Negative	P1;P60	OOMA;OMPFAA	BCA;Met
Acot11	6.24735	7.57148	9.67823	10.0212	9.97529	10.1555	3.31707e-08	D;U	Positive	P1;P60	OMPFAA	BCA;CCDB;EPRSS;Met;Or
Gdap2	8.86714	9.532	11.0002	11.0694	10.6009	12.5767	3.33316e-08	U	Positive	P60	Unclassified	CCDB
Crhr2	0.666667	8.06786	8.67988	6.93738	5.14283	3.1504	3.36842e-08	E	Positive	P1	Unclassified	BRB;CCDB;LT
Cd79a	2.04309	4.0687	9.08553	7.84187	8.35296	5.62655	3.3744e-08	D	Positive	P1	Unclassified	BRB;CCDB;EPRSS;IS;LT;Mem
Pld1	10.8107	10.4697	8.57892	8.33785	8.38426	5.44828	3.41419e-08	C1	Negative	P60	GGA;VTSC	Bi;BCA;Di;EPRSS;IS;LT;Mem;Met;Or
Rps15-ps2	10.8786	9.89214	8.71077	8.3144	8.78471	8.61625	3.41713e-08	N	Negative	P4
Cpn1	12.1262	11.1526	10.0553	10.4424	10.7212	9.75893	3.42117e-08	Predicted_contaminant
Prrg4	9.16875	8.49827	4.09744	4.62806	5.57136	2.40961	3.4376e-08	C1	Negative	P60	CMP	Bi;CCDB;Mem;Or
Wdr7	9.14597	10.1995	11.3763	11.1533	11.1265	11.2397	3.44897e-08	D	Positive	P1	Unclassified	Bi;DPR
Amotl1	11.8869	11.7124	10.0288	9.63599	9.92689	9.42395	3.45027e-08	C1;J	Negative	P1;P60	Unclassified	ACAM;Bi;CCDB;EPRSS;GIP;Mem
Phyhip	3.09974	7.53323	7.9284	7.91766	7.67783	8.0957	3.45746e-08	D	Positive	P1	Unclassified	Bi
Taf1d	10.6125	10.0453	7.92057	7.89388	7.85236	7.47526	3.45779e-08	C1	Negative	P60	Unclassified	Bi;CCDB;GIP
Prpsap1	11.6534	10.9339	9.76785	9.72307	9.70762	9.48284	3.46424e-08	C1;J;T	Negative	P1;P12;P60	Unclassified	Bi;BCA;Met
Cyp2c70	7.97976	6.72775	0.333333	2.44662	3.05664	0	3.4652e-08	C1;J	Negative	P1;P60	OOMA;OMPFAA	Bi;BCA;Di;Mem;Met;Or
Glul	10.9822	12.3744	13.2913	12.9129	12.4128	11.5098	3.47422e-08	D;E	Positive	P1	Unclassified	ACAM;BRB;CCDB;EPRSS;Or
Gm14230	8.01863	6.65102	0.773976	2.90475	3.02561	0	3.48941e-08	C1	Negative	P60
Ide	12.276	11.5799	10.2953	10.4261	10.4865	10.3665	3.50484e-08	C1;J;T	Negative	P1;P12;P60	Unclassified	Bi;BRB;BCA;CCDB;DPR;Di;GIP;Met;Or
Atp2a2	13.2592	14.4643	15.6924	15.3407	15.1166	15.2365	3.51466e-08	D	Positive	P1	ITH;MPIC	Bi;BRB;Di;EPRSS;IS;LT;Mem;SP
Scd2	15.0724	14.358	13.184	12.7815	12.9841	12.2247	3.51608e-08	C1	Negative	P60	OOMA;OMPFAA	Bi;BCA;EPRSS;Mem;Met
Gnb2l1	15.2457	14.6353	13.3527	12.8301	13.0853	12.4116	3.52788e-08	C1;J;N;T	Negative	P1;P12;P4;P60	GGA;MPIC;PTSKA;VTSC	ACAM;Bi;BRB;BCA;CPGD;CCDB;DPR;Di;EPRSS;GIP;LT;Mem;Met;Or;SP
Rnd2	9.56364	8.36039	5.15892	5.84038	5.92072	5.90138	3.54811e-08	C1;J	Negative	P1;P60	GGA;VTSC	Bi;CPGD;CCDB;DPR;EPRSS;Mem;Or
Usp43	9.91391	9.04224	6.25129	6.79209	6.73235	4.34264	3.55395e-08	C1	Negative	P60	Unclassified	BCA;Met
Nlgn2	9.39842	10.6866	11.1589	11.7644	11.3653	10.5984	3.5634e-08	D;K;O	Positive	P1;P12;P4	Unclassified	ACAM;Bi;BRB;LT;Mem
Gpc4	9.37158	10.374	11.2813	11.456	11.6833	10.7377	3.57131e-08	D;O	Positive	P1;P12	Unclassified	CCDB;EPRSS;GIP;Mem;Or
Egln3	9.052	7.77709	5.08343	5.54359	4.48869	0.333333	3.58159e-08	C1	Negative	P60	OOMA;OMPFAA	Bi;BCA;CPGD;CCDB;Di;EPRSS;GIP;Met
Grwd1	10.4569	9.49939	7.70433	7.79925	7.85597	7.08418	3.60674e-08	C1	Negative	P60	Unclassified	Bi;GIP
Rhobtb3	11.9824	12.0389	10.2286	9.95599	9.82457	8.99428	3.62101e-08	C1	Negative	P60	GGA	Bi;BCA;EPRSS;LT;Or
Ascl2	7.70215	6.29203	0	1.33333	2	0	3.63407e-08	C1;J	Negative	P1;P60	OOMA	Bi;BRB;CPGD;DPR;EPRSS;GIP
Rps4x	14.1406	13.6655	12.3431	11.8126	12.1365	11.7231	3.64488e-08	C1;J;N	Negative	P1;P4;P60	Unclassified	CPGD;CCDB;DPR;GIP;Mem;Met;Or
Laptm5	10.2126	10.9645	5.52449	6.58255	8.4663	3.1504	3.66408e-08	C1	Negative	P60	Unclassified	LT;Mem
Dusp10	6.68	9.98	10.21	9.36	9.39	9.23	3.66801e-08	A;D	Positive	E15.5_Ngn3_Het;P1	Unclassified	ACAM;BRB;BCA;DPR;EPRSS;GIP;Met;Or
Bcl11a	10.189	9.68131	7.82274	7.04369	7.08632	1.52832	3.69414e-08	B1;C1	Negative	P60	Unclassified	ACAM;Bi;CPGD;CCDB;DPR;GIP;IS;Met
Pold1	10.9294	10.0841	8.302	9.03177	8.96196	7.80921	3.6973e-08	C1	Negative	P60	Unclassified	Bi;BRB;CPGD;CCDB;GIP;Mem;Met
Cox6a2	0	0.666667	6.70562	7.93452	6.13694	11.8278	3.6988e-08	U;V	Positive	P60	Unclassified	CCDB;Mem;Or
Nr0b2	8.76306	7.1839	3.54795	4.68237	5.25014	0.528321	3.70601e-08	C1	Negative	P60	GGPMTC;IPS	Bi;BCA;CCDB;DPR;EPRSS;GIP;LT
Gm14586	12.7636	12.0007	11.0888	10.738	10.9527	10.7475	3.72091e-08	N	Negative	P4
Greb1	8.33354	8.19643	1.19499	2.99243	2.9183	0	3.78725e-08	C1	Negative	P60	Unclassified	Mem
Dnajc22	9.4206	8.51685	5.70804	5.23862	5.61082	3.31709	3.79677e-08	C1	Negative	P60	Unclassified	Mem
Fhod3	7.21926	8.91102	10.7896	10.2512	9.72212	9.82793	3.8106e-08	D	Positive	P1	Unclassified	Bi;CCDB;DPR;GIP;Or
Gpr26	0.666667	5.37964	6.54857	6.53963	6.5256	11.0843	3.83577e-08	U	Positive	P60	Unclassified	Mem
Klk1	8.02168	6.35706	5.35668	11.0221	12.6005	5.5799	3.8404e-08	Predicted_contaminant
Tln2	11.7619	11.1344	9.81125	9.62734	10.1865	9.45772	3.8435e-08	C1;J	Negative	P1;P60	Unclassified	ACAM;Bi;CCDB;Di;LT
Tcta	8.87359	10.0297	10.9577	10.9781	10.8302	11.606	3.86864e-08	U	Positive	P60	Unclassified	Mem
Dnajc6	7.59071	8.59861	10.4508	10.4837	10.432	10.678	3.87477e-08	D;O;U	Positive	P1;P12;P60	VTSC	ACAM;Bi;BCA;CCDB;LT;Met;Or
Naa50	12.6094	12.0115	10.7079	10.7958	10.6956	10.6118	3.87946e-08	C1;J	Negative	P1;P60	Unclassified	Bi;BCA;CPGD;CCDB;GIP;Met;Or
Aifm1	11.2161	10.5947	9.08993	9.12805	9.00707	9.07034	3.90157e-08	C1;J;T	Negative	P1;P12;P60	OOMA	Bi;BRB;BCA;CPGD;CCDB;DPR;EPRSS;GIP;Mem;Met
Prss1	10.8027	9.21404	6.2215	12.8992	12.5006	1.96896	3.90915e-08	Predicted_contaminant
Usp1	11.6243	11.0322	9.44474	9.76504	9.72138	9.62045	3.93092e-08	C1;J;T	Negative	P1;P12;P60	Unclassified	Bi;BCA;CPGD;DPR;EPRSS;GIP;Met
Rpl7l1	11.6697	11.093	9.68586	9.70568	9.58391	9.90827	3.9349e-08	C1;J	Negative	P1;P60	Unclassified	GIP
Lad1	10.1271	8.9017	6.27053	7.13447	7.67078	7.10465	3.94823e-08	J	Negative	P1	Unclassified	CCDB
Trp63	7.71405	6.07807	1.52832	2.54795	0.528321	0	3.95296e-08	C1;J;T	Negative	P1;P12;P60	Unclassified	ACAM;Bi;BRB;CPGD;CCDB;DPR;Di;EPRSS;GIP;Or;SP
Necab2	2.98	8.68	8.76	7.87	5.7	6.59	3.98152e-08	A	Positive	E15.5_Ngn3_Het	Unclassified	CCDB
Cdca3	10.792	9.89904	8.57315	8.57173	8.71126	7.04663	3.98953e-08	C1	Negative	P60	Unclassified	CPGD;CCDB;Met
Ccnb2	10.8862	10.1354	9.26603	8.6133	8.47257	6.26963	4.006e-08	C1	Negative	P60	PTSKA	Bi;BRB;CPGD;CCDB;DPR;EPRSS;GIP;Mem;Or
Myo3a	0.861654	3.40477	5.90496	7.40807	8.72113	9.18369	4.05395e-08	U	Positive	P60	PTSKA	Bi;BCA;CCDB;Met;SP
Gab1	10.9957	10.9041	9.01499	8.75432	8.52703	4.90376	4.07016e-08	C1	Negative	P60	GGA;IPS;ITH;PTSKA	ACAM;Bi;BCA;CCDB;DPR;Di;EPRSS;IS;Or
Cdc25a	11.7685	11.0828	9.83513	10.0937	9.67304	9.7951	4.07237e-08	C1;J;T	Negative	P1;P12;P60	Unclassified	Bi;BCA;CPGD;Di;EPRSS;GIP;Met
Mras	6.50165	8.5209	9.97374	9.92611	9.73615	9.6744	4.08441e-08	D	Positive	P1	GGA	ACAM;Bi;BCA;CCDB;EPRSS;LT;Mem;Or
Lrrc55	2.19499	2.40961	8.57805	6.3858	7.52259	11.9253	4.08615e-08	V	Positive	P60
Tead3	9.73518	9.49957	5.95283	6.18202	6.11841	1.05664	4.09378e-08	C1	Negative	P60	Unclassified	EPRSS;GIP
Rps25-ps1	11.8026	11.1631	10.1078	9.65138	9.79512	10.0784	4.11325e-08	N	Negative	P4
Man1c1	7.17	9.66	9.87	10.22	10.09	9.57	4.12015e-08	A;D;O	Positive	E15.5_Ngn3_Het;P1;P12	CMP	Bi;BCA;Mem;Met
Cdca2	10.6174	9.7606	8.40562	8.41628	7.9435	6.52837	4.12926e-08	C1	Negative	P60	Unclassified	CPGD;CCDB;GIP;Met
Fgfr1	10.9229	10.4945	8.53882	8.64176	8.83894	6.98968	4.1632e-08	C1	Negative	P60	GGA;IPS;ITH;PTSKA;VTSC	ACAM;Bi;BCA;CPGD;CCDB;DPR;Di;EPRSS;GIP;IS;Mem;Met;Or;SP
Tuba1a	10.8655	12.0347	12.8143	12.7458	12.1728	12.6158	4.1861e-08	D;U	Positive	P1;P60	Unclassified	Bi;BCA;CCDB;GIP;Or
Ipo11	10.8933	10.3168	8.77099	8.44895	8.55465	7.98069	4.20773e-08	C1	Negative	P60	GGA	Bi;GIP;LT
Efhd2	11.667	11.4414	9.40372	9.61039	9.8652	9.30541	4.22225e-08	C1	Negative	P60	CMP	Bi
Cyp4f39	2.32193	3.42847	8.09862	8.47156	8.81626	6.7217	4.2268e-08	O	Positive	P12
Sapcd2	10.2637	9.0801	7.69172	7.61021	7.69494	5.47206	4.23638e-08	C1	Negative	P60	Unclassified	CCDB;GIP
Fam159b	0.333333	5.97491	6.67663	6.42365	7.27711	8.61231	4.24645e-08	U	Positive	P60	Unclassified	Mem
Rph3a	0	3.41598	6.39598	7.19192	7.39522	9.89846	4.24715e-08	D;U	Positive	P1;P60	CMP	ACAM;Bi;LT;Mem;Or
Man2a1	12.4801	11.898	10.8743	10.6982	10.5777	9.89178	4.27562e-08	C1;J	Negative	P1;P60	VTSC	Bi;BCA;CCDB;DPR;LT;Mem;Met;Or
Vash2	9.50015	9.72117	6.45673	5.16702	4.50879	0	4.27882e-08	C1	Negative	P60	Unclassified	BRB;CPGD;CCDB;DPR
Phyh	9.08673	10.3021	11.5616	10.9828	10.849	10.9644	4.32547e-08	D	Positive	P1	OOMA	Bi;CCDB;Met
Set	12.8966	12.4757	11.2134	11.0241	10.805	10.6138	4.37114e-08	C1;N	Negative	P4;P60	Unclassified	CPGD;CCDB;GIP;Met;Or
Lrrc8b	10.6659	9.9693	8.62455	8.34424	7.84562	6.7297	4.37288e-08	C1	Negative	P60	Unclassified	Bi;Mem
Kctd14	8.84014	7.79493	1.86165	4.74911	6.04829	1.60245	4.37852e-08	C1	Negative	P60	Unclassified	Bi;CCDB
Qser1	12.1962	11.8053	10.482	10.2451	10.3141	9.73461	4.3869e-08	C1	Negative	P60
Mad2l1	10.8906	10.1107	9.10043	8.70893	8.53976	7.12687	4.39352e-08	C1	Negative	P60	PTSKA	Bi;BCA;CPGD;CCDB;DPR;Di;GIP;LT
Trim59	10.8737	10.3838	9.02553	8.55538	8.25278	6.93177	4.43855e-08	C1	Negative	P60	Unclassified	ACAM;Bi;BCA;EPRSS;IS;Mem;Met;Or
Tcf7l2	10.549	10.0425	8.02614	8.01286	7.65679	6.57343	4.44545e-08	C1;J;T	Negative	P1;P12;P60	GGPMTC;IPS;OOMA;PTSKA	ACAM;Bi;BRB;BCA;CPGD;CCDB;DPR;Di;EPRSS;GIP;LT;Met;Or;SP
Lrrc7	8.49581	7.21388	3.07144	3.34539	4.83881	1.19499	4.45432e-08	C1	Negative	P60	Unclassified	Bi
Tshz3	4.74	7.93	8.52	8.59	9.17	8.88	4.4619e-08	A;D;U	Positive	E15.5_Ngn3_Het;P1;P60	Unclassified	Bi;BCA;CCDB;DPR;GIP;SP
Morc4	10.3601	9.62049	7.26281	7.26332	7.61262	7.65649	4.46306e-08	C1	Negative	P60	Unclassified	Bi;GIP
Clca4	7.17844	4.19733	0.528321	0	0.333333	0	4.47436e-08	C1;J	Negative	P1;P60	Unclassified	Bi;EPRSS
Gemin5	11.4948	10.733	9.65065	9.47455	9.70889	9.20647	4.48768e-08	C1;N	Negative	P4;P60	Unclassified	Bi;CCDB;GIP;Mem;Met
Fbxo2	0.528321	4.84542	5.56122	7.6982	7.60232	9.08468	4.50424e-08	K;U	Positive	P4;P60	Unclassified	Bi;BCA;CCDB;Mem;Met;SP
Hdgf	13.6433	13.0137	11.9203	11.6678	11.7103	11.2403	4.50517e-08	C1;J	Negative	P1;P60	Unclassified	Bi;CCDB;GIP;LT
Chst11	8.20861	9.04968	10.1224	10.2779	10.7849	12.4533	4.5342e-08	U	Positive	P60
Itih2	8.88793	7.62911	2.44064	4.44158	6.69312	1.05664	4.5366e-08	C1	Negative	P60	Unclassified	BCA;CCDB;Met
Ftsj3	11.6376	11.0778	9.78351	9.68447	9.48237	9.83542	4.59595e-08	C1;J	Negative	P1;P60	Unclassified	Bi;BCA;GIP
Tpsb2	7.32198	5.36156	0	0	0	0	4.63284e-08	C1;J	Negative	P1;P60	Unclassified	Bi;BCA;CCDB;EPRSS
Gm7666	10.8659	10.0247	8.66876	8.45111	8.40163	9.16266	4.64945e-08	T	Negative	P12
Gnptab	11.5769	10.7191	9.69987	9.73683	9.6807	9.70003	4.69236e-08	C1;J;T	Negative	P1;P12;P60	VTSC	Bi;BCA;DPR;GIP;LT;Mem;Met;Or
Nlrp3	8.05275	8.45127	0	0.528321	2.49728	2.32576	4.69276e-08	J	Negative	P1	VTSC	Bi;BCA;Di;EPRSS;GIP;IS;LT;Met
Prdm11	10.9691	10.4578	9.06756	8.83843	8.67146	6.79272	4.69853e-08	C1	Negative	P60	Unclassified	Bi;BCA;Met
Plagl2	11.856	11.45	10.3465	10.1569	9.78013	8.45486	4.70043e-08	C1	Negative	P60	Unclassified	Bi;BRB;CPGD;CCDB;DPR;GIP;Met
Itpr1	10.22	12.06	12.08	11.73	11.87	10.86	4.70326e-08	A;B;E	Positive	E15.5_Ngn3_Het;P1	Unclassified	Bi;BCA;LT;Mem;Or
Dpp6	5.18	9.38	9.08	9.31	8.03	7.61	4.7284e-08	A;L	Positive	E15.5_Ngn3_Het;P4	Unclassified	ACAM;Bi;BRB;BCA;EPRSS;Mem;Met;Or;SP
Heph	8.97552	8.30606	3.74891	4.92343	5.32415	0.333333	4.73861e-08	C1	Negative	P60	GGPMTC;ITH;OOMA	Bi;BRB;BCA;CCDB;LT;Mem;Met;SP
Prdx4	11.3412	10.6118	8.98034	9.2791	10.1112	8.33608	4.73937e-08	C1	Negative	P60	OOMA;OMPFAA	BRB;BCA;CCDB;DPR;GIP;Met
Rgma	9.84904	9.70913	5.82053	6.32767	6.87382	1.33333	4.75955e-08	C1	Negative	P60	PTSKA	ACAM;Bi;DPR;EPRSS;Mem;Met;Or
Slc36a1	9.76	11.66	11.65	11.41	11.28	10.77	4.80115e-08	A;D;L	Positive	E15.5_Ngn3_Het;P1;P4	ITH	LT;Mem;Or;SP
Hhex	10.6561	10.6857	7.92471	8.11057	8.03426	4.93458	4.81994e-08	C1	Negative	P60	IPS;PTSKA	Bi;CPGD;CCDB;DPR;Di;EPRSS;GIP;IS;LT
Rps5	14.3124	13.6935	12.5995	12.1055	12.3428	11.8152	4.88178e-08	C1;J;N	Negative	P1;P4;P60	Unclassified	CCDB;GIP;Mem;Met;Or
Gstp1	11.368	10.4446	9.77688	9.65214	9.41081	8.30543	4.90686e-08	C1	Negative	P60	OOMA	ACAM;Bi;BRB;BCA;CPGD;CCDB;DPR;Di;EPRSS;GIP;Mem;Met
Eef1b2	13.9758	13.4588	12.4958	11.6814	11.8883	11.6227	4.91559e-08	C1;J;N	Negative	P1;P4;P60	Unclassified	Bi;CCDB;GIP
Pfn1	13.5641	13.2203	11.604	11.6587	11.6875	11.0262	4.91595e-08	C1;J	Negative	P1;P60	CMP;GGA;VTSC	ACAM;Bi;BRB;BCA;CCDB;DPR;EPRSS;GIP;IS;LT;Mem;Or
Esrp2	11.6563	11.3424	10.1557	9.98981	9.33289	8.02067	4.92444e-08	C1	Negative	P60	Unclassified	Bi;CCDB;GIP
Ina	3.63161	3.45215	7.30337	8.46273	9.55063	10.7953	4.93414e-08	U;V	Positive	P60	Unclassified	CCDB;DPR
Rpl7a	12.2509	11.7032	10.7276	10.1877	10.2619	10.3319	4.94972e-08	C1;J;N	Negative	P1;P4;P60	Unclassified	Bi;CCDB;GIP;Mem
Rpl32	14.063	13.5817	12.4285	11.8108	12.0581	11.6171	4.95919e-08	C1;N	Negative	P4;P60	Unclassified	CCDB;GIP;Mem;Met
Slc43a1	9.04252	8.52311	5.84318	4.5499	3.88726	0	5.03144e-08	C1	Negative	P60	ITH	LT;Mem
Plod2	9.90326	10.0001	7.13043	6.49407	5.4682	1.46411	5.04892e-08	C1	Negative	P60	OOMA;OMPFAA	Bi;BCA;CCDB;EPRSS;Mem;Met;Or
Paics	12.6858	12.3158	10.7935	10.7163	10.7537	10.8468	5.05561e-08	C1;J	Negative	P1;P60	Unclassified	Bi;BCA;Mem;Met;Or
Kif4	10.6171	9.8565	8.44449	8.39648	8.08895	6.26796	5.09195e-08	C1	Negative	P60	Unclassified	ACAM;Bi;BRB;BCA;CCDB;DPR;GIP;Met
Banf1	11.5166	10.8097	9.72361	9.63054	9.62262	9.16702	5.10155e-08	C1;J	Negative	P1;P60	Unclassified	Bi;CPGD;GIP;Or
Hspa1a	4.59153	6.81161	5.94139	10.0926	5.78286	13.4625	5.11474e-08	X	Positive	P60
Elf4	11.6763	11.5213	9.83385	10.0573	9.74381	7.02246	5.11899e-08	C1	Negative	P60	Unclassified	Bi;DPR;GIP;IS
Hcn2	5.32337	7.01758	9.16537	9.49682	9.45813	9.17674	5.14457e-08	D;O	Positive	P1;P12	GGA;ITH;MPIC	Bi;EPRSS;LT;Mem;SP
Lgals1	10.0908	9.80279	6.02993	7.38515	7.79562	1	5.14697e-08	C1	Negative	P60	Unclassified	ACAM;Bi;BRB;CPGD;CCDB;DPR;EPRSS;GIP;IS;Or
Cxcl2	7.90782	8.90591	0.333333	1.93578	0.333333	2.35894	5.15433e-08	J;T	Negative	P1;P12	GGA;ITH	ACAM;Bi;BRB;CCDB;Di;EPRSS;IS
Gm12404	1.33333	6.14489	7.29096	7.49794	7.34306	6.41586	5.16064e-08	D	Positive	P1
Plin3	11.08	10.4004	9.45187	9.46458	8.52897	6.68135	5.17595e-08	C1	Negative	P60	Unclassified	Mem;Or
F10	7.94158	6.52923	1.38998	2.60245	3.37471	0.773976	5.19831e-08	C1	Negative	P60	CMP;VTSC	Bi;BRB;BCA;CCDB;EPRSS;IS;LT;Mem;Met;Or
Fam46c	13.505	12.1348	11.697	11.9716	11.8841	11.4576	5.20408e-08	Singleton	Negative	P60
Pamr1	11.6967	11.7652	9.49067	9.89992	9.83731	8.45858	5.21464e-08	C1	Negative	P60	CMP	Bi;BCA;CCDB;Met
Tuba1b	12.9181	12.3881	11.1158	11.1505	10.8631	10.9812	5.22161e-08	C1;J;N;T	Negative	P1;P12;P4;P60	GGA	ACAM;Bi;BCA;CCDB;EPRSS;GIP;Met;Or
Ier2	13.4932	12.683	11.4814	11.7595	11.3278	12.2904	5.23198e-08	S	Negative	P12
Zfp174	7.27	10.32	10.41	10.01	9.36	8.95	5.24017e-08	A;E	Positive	E15.5_Ngn3_Het;P1	Unclassified	Bi;BRB;CCDB;Met;Or
Ppm1l	10.5972	11.0892	12.6542	12.4414	12.472	12.1442	5.27899e-08	D;O	Positive	P1;P12	Unclassified	Bi;BCA;EPRSS;Mem;Met;Or
Bcl11b	9.36468	9.11595	4.58829	4.78023	6.65161	0.333333	5.33299e-08	C1	Negative	P60	Unclassified	ACAM;Bi;CPGD;DPR;GIP;IS
Tcf3	12.0179	11.875	10.1588	10.2287	10.0518	9.25485	5.37088e-08	C1;J	Negative	P1;P60	Unclassified	Bi;BRB;CPGD;CCDB;DPR;Di;EPRSS;GIP;IS
Arhgef39	9.91085	8.79794	6.60834	6.93013	7.04007	5.09282	5.39047e-08	C1	Negative	P60	GGA	ACAM;BCA;Mem
Aqp1	10.0495	8.93585	6.94231	7.34601	8.22816	1.33333	5.40845e-08	B1;C1	Negative	P60	ITH;MPIC;OOMA	ACAM;BRB;BCA;CPGD;DPR;EPRSS;GIP;LT;Mem;Met;Or;SP
Sept11	12.4932	11.6861	10.6298	10.8081	10.5808	10.9699	5.40913e-08	C1;J	Negative	P1;P60	Unclassified	ACAM;Bi;CPGD;CCDB;SP
Psmc3	12.3302	11.8987	10.5483	10.4456	10.3485	10.4508	5.42814e-08	C1;J	Negative	P1;P60	Unclassified	Bi;BCA;CCDB;DPR;Di;GIP;Mem;Met
Ruvbl2	11.1902	10.4165	9.2589	9.22904	9.22826	8.74025	5.50354e-08	C1;J;T	Negative	P1;P12;P60	Unclassified	Bi;EPRSS;GIP;LT;Met;Or
Rpa2	10.6845	9.81801	8.04508	8.84493	8.19422	7.88727	5.55274e-08	C1;J;T	Negative	P1;P12;P60	Unclassified	Bi;CPGD;GIP
Plekha7	11.0525	10.6787	8.83005	9.12103	8.96879	7.17963	5.55863e-08	C1	Negative	P60	Unclassified	ACAM;Bi;CCDB;GIP;Or
Itgam	8.33124	9.0481	1.10731	2.87157	3.77039	1.19499	5.56393e-08	C1;J;Z	Negative	P1;P60	Unclassified	ACAM;Bi;CCDB;DPR;Di;EPRSS;GIP;IS;Mem;Or
E2f3	10.6102	10.2652	8.21498	8.26652	7.70576	6.35041	5.58185e-08	C1	Negative	P60	Unclassified	Bi;CPGD;Di;GIP;Or
Rps16-ps2	13.6651	12.9402	11.9144	11.6409	11.8993	11.4781	5.60998e-08	C1	Negative	P60
Rab3c	3.69227	7.84841	7.79511	7.67703	7.26811	10.1693	5.6201e-08	U	Positive	P60	GGA	Bi;BCA
Fam19a5	6.07352	7.24683	9.31892	10.0227	9.77728	10.0509	5.62161e-08	U	Positive	P60	Unclassified	CCDB;Mem
Aplp2	13.1292	13.1197	11.2879	11.1484	11.1731	10.5063	5.63615e-08	C1;J	Negative	P1;P60	ITH;PTSKA	Bi;BRB;BCA;DPR;GIP;Mem;Met;Or
Cdh7	0.861654	2.46411	6.35351	7.48283	8.25447	9.31937	5.6455e-08	U	Positive	P60	CMP	ACAM;Bi;Mem
Diap3	10.1065	9.22053	7.2169	7.22745	7.20907	5.47197	5.66086e-08	C1	Negative	P60	GGA	Bi;CCDB;DPR;GIP
Cyc1	12.1123	11.5352	10.3505	10.1788	10.2313	10.3798	5.68407e-08	C1;J;N;T	Negative	P1;P12;P4;P60	GGPMTC;OOMA	ACAM;Bi;Di;EPRSS;GIP;Mem;Met
Dut	11.3008	10.5633	9.44724	9.54663	9.20161	8.87071	5.72389e-08	C1;J	Negative	P1;P60	Unclassified	Bi;BCA;CCDB;GIP;Met;Or
Mknk2	11.7512	11.3215	9.91265	10.0078	9.85866	9.10943	5.75766e-08	C1	Negative	P60	IPS;OOMA;PTSKA	Bi;BCA;CPGD;CCDB;DPR;EPRSS;GIP;Mem;Met
Eml6	6.01138	7.3041	9.60711	9.74303	9.51921	10.1878	5.76645e-08	D;U	Positive	P1;P60	Unclassified	Bi;CCDB
Kctd8	2.25	6.87	7.03	7.8	7.52	7.06	5.77862e-08	A;D	Positive	E15.5_Ngn3_Het;P1	Unclassified	ACAM;Bi;BRB;CCDB;EPRSS;Mem
Slc6a20a	0.528321	4.99856	7.98437	8.18109	7.10182	2.16395	5.79777e-08	E	Positive	P1
Samhd1	11.3727	10.8562	9.1232	9.37644	9.64831	9.147	5.81442e-08	C1;J	Negative	P1;P60	Unclassified	Bi;BCA;CCDB;GIP;IS;Mem;Met
Rps2-ps10	11.5669	11.0839	10.0772	8.75148	9.61298	10.1037	5.81511e-08	N	Negative	P4
Cenpf	12.0236	11.4222	10.7224	10.2989	10.3393	8.16468	5.84427e-08	C1	Negative	P60	Unclassified	Bi;CPGD;CCDB;DPR;GIP;LT;Mem
Hmgn1	13.0589	12.821	11.5182	11.0899	10.8649	10.7973	5.90898e-08	C1;J;N;T	Negative	P1;P12;P4;P60	Unclassified	CPGD;CCDB;DPR;Di;EPRSS;GIP
Aldh1l1	8.84986	7.60014	4.10505	4.03092	6.0589	1.63563	5.91821e-08	C1	Negative	P60	OOMA;OMPFAA	BCA;CCDB;Met;Or
Galnt7	11.1097	10.3324	8.58355	9.08727	9.37254	9.26711	5.94346e-08	J	Negative	P1	Unclassified	BCA;Mem;Met;Or
BC067074	10.0109	10.4903	7.35339	6.62107	6.41015	1.9183	5.96331e-08	C1	Negative	P60
Wdr5	11.8082	11.2904	10.0618	10.0487	9.86932	9.4718	5.9898e-08	C1;J;T	Negative	P1;P12;P60	GGPMTC	Bi;BCA;DPR;GIP
Akap1	10.9691	10.1336	8.86622	8.82434	8.95888	8.74378	6.02543e-08	C1;J	Negative	P1;P60	Unclassified	Bi;BRB;DPR;GIP;Mem;Or
BC006965	8.47356	9.73989	2.54795	3.73322	4.15178	0	6.04674e-08	C1	Negative	P60
Nop10	10.8599	10.0556	8.42448	8.44614	8.81054	9.16847	6.08288e-08	J;T	Negative	P1;P12	Unclassified	Bi;GIP
Try10	10.9021	9.25374	6.04363	12.375	12.563	2.81981	6.12359e-08	Predicted_contaminant
Gys1	10.7508	10.0369	8.58333	8.48845	8.16857	8.38349	6.12809e-08	C1;J;T	Negative	P1;P12;P60	GGPMTC;IPS;OOMA	Bi;BCA;CCDB;DPR;EPRSS;Mem;Met
Slc44a2	11.0407	10.7068	8.90868	8.81309	9.03319	7.68316	6.14462e-08	C1	Negative	P60	GGPMTC	Bi;BCA;EPRSS;LT;Mem;Met;Or
Sema6d	7.48333	9.90879	10.1692	10.3611	10.2346	8.50909	6.17865e-08	O	Positive	P12	Unclassified	ACAM;Bi;CCDB;DPR;Mem;Or
Robo1	8.59464	9.55832	11.189	10.9817	11.1498	8.8722	6.19329e-08	E	Positive	P1
Igf2os	8.63415	7.5426	4.65826	4.56775	2.40961	3.75246	6.23893e-08	T	Negative	P12
Rpl7	14.2352	13.8985	12.5749	11.9336	12.0673	12.0886	6.28553e-08	C1;J;N	Negative	P1;P4;P60	Unclassified	Bi;CCDB;GIP;Mem;Met;Or
Mllt1	11.3255	10.7265	9.25936	9.45864	9.45016	8.98221	6.2904e-08	C1;J	Negative	P1;P60	Unclassified	Bi;BCA;GIP
Cdh22	3.87645	6.44745	8.15357	8.99209	8.77053	7.1098	6.30134e-08	D;K	Positive	P1;P4	Unclassified	ACAM;DPR;Mem
Vars	12.7641	11.8562	10.8873	11.158	11.2304	10.6249	6.3129e-08	C1;J	Negative	P1;P60	OMPFAA	Bi;BCA;GIP
Rps17	12.0853	11.5789	10.576	10.1074	10.1807	9.93076	6.33203e-08	C1;J;N	Negative	P1;P4;P60	Unclassified	BRB;CCDB;GIP;Mem;Met;Or
Tcp1	13.5372	13.1795	11.9675	11.5472	11.4319	11.1757	6.34099e-08	C1;J;N	Negative	P1;P4;P60	Unclassified	ACAM;Bi;BCA;CCDB;DPR;GIP;Mem;Met;Or
Ybx1	13.785	13.3342	12.3008	11.9042	11.6199	11.1244	6.3693e-08	C1;J	Negative	P1;P60	Unclassified	Bi;CCDB;DPR;GIP;Mem;Or
Mir17hg	9.03077	8.51195	5.08947	4.62435	4.81913	1.60245	6.38434e-08	C1	Negative	P60
Rab11fip4	10.5273	10.789	8.37718	7.81743	7.2276	4.91294	6.39063e-08	C1	Negative	P60	CMP;GGA;VTSC	Bi;CPGD;CCDB;LT;Mem;Or
Rapsn	7.80262	6.8479	1.52832	1.86165	2.58496	0	6.39656e-08	C1	Negative	P60	Unclassified	ACAM;Bi;BRB;CPGD;CCDB;LT;Mem;Or
Dner	4.75	8.66	8.58	8.56	8.04	8.97	6.39825e-08	A;D;U	Positive	E15.5_Ngn3_Het;P1;P60	Unclassified	Bi;DPR;EPRSS;Mem;Met;Or;SP
Erbb2	10.2069	10.216	7.83686	7.31477	6.70096	1	6.47419e-08	B1;C1	Negative	P60	GGA;ITH;PTSKA	ACAM;Bi;BRB;BCA;CPGD;CCDB;DPR;Di;EPRSS;GIP;IS;Mem;Met;Or
Por	10.32	11.21	12.17	12.26	11.93	11.69	6.47613e-08	A;D;O	Positive	E15.5_Ngn3_Het;P1;P12	OOMA;OMPFAA	Bi;BCA;CPGD;CCDB;DPR;EPRSS;LT;Mem;Met;Or
Impdh2	10.6116	9.91783	8.38858	8.17839	7.93093	7.8898	6.52309e-08	C1;J	Negative	P1;P60	OOMA	Bi;BCA;CCDB;DPR;EPRSS;GIP;IS;Mem;Met;Or
Rps25	12.4235	12.0209	10.8233	10.2771	10.524	10.6876	6.55121e-08	C1;J;N	Negative	P1;P4;P60	Unclassified	Bi;CCDB;GIP;Met;Or
Tbrg4	11.337	10.4879	9.36691	9.6068	9.49478	9.19134	6.56516e-08	C1;J	Negative	P1;P60	OOMA	BCA;CCDB;GIP;Met
Ankrd12	9.1931	10.2769	11.3402	10.9923	11.1608	11.0201	6.60372e-08	D	Positive	P1	Unclassified	Bi;GIP
Lmtk3	6.83847	8.7441	9.17251	10.0793	9.93911	10.7607	6.60751e-08	U	Positive	P60	PTSKA	Bi;BCA;Mem;Met;SP
Gramd1a	9.79498	10.6615	11.9398	11.6834	11.5253	11.0164	6.61382e-08	D	Positive	P1	Unclassified	Mem
Sycn	8.78524	7.58905	5.49502	11.9505	12.1642	6.51466	6.63912e-08	R	Positive	P12
Lrp4	9.27515	8.24467	4.83659	6.06259	6.30481	1.3023	6.65695e-08	C1	Negative	P60	CMP;VTSC	ACAM;Bi;CPGD;CCDB;DPR;EPRSS;LT;Mem;Met;SP
Mroh7	4.07627	7.14815	8.8199	8.5385	7.91227	8.16988	6.69715e-08	D	Positive	P1	Unclassified	Mem
Nap1l5	3.16395	7.18439	6.87309	7.31648	7.62027	10.3055	6.73168e-08	U	Positive	P60	Unclassified	GIP
Tom1l1	11.1921	10.6258	9.4745	9.30813	8.85621	8.59918	6.74321e-08	C1;J;T	Negative	P1;P12;P60	Unclassified	Bi;BCA;CPGD;CCDB;EPRSS;LT;Mem;Met;Or
Gm12360	0.333333	5.34341	7.3627	6.89783	6.97704	6.9191	6.75095e-08	D	Positive	P1
Gm6472	13.2861	12.6096	11.7318	11.2653	11.4586	11.2483	6.77983e-08	N	Negative	P4
Cdk4	13.5461	13.1767	11.8541	11.6522	11.4728	11.2651	6.83945e-08	C1;J;T	Negative	P1;P12;P60	IPS;PTSKA	ACAM;Bi;BRB;BCA;CPGD;CCDB;DPR;Di;EPRSS;GIP;IS;Mem;Met
Hnrnpab	13.7333	13.3521	11.988	11.8274	11.6879	11.3935	6.8815e-08	C1	Negative	P60	Unclassified	Bi;DPR;GIP
Rps10-ps1	10.8071	9.8141	8.60533	8.52644	8.92306	8.61107	6.93494e-08	N	Negative	P4	Unclassified	CCDB;GIP
Pus7	10.9873	10.2493	9.01964	8.82117	8.98466	8.55893	6.96256e-08	C1;J	Negative	P1;P60	Unclassified	Bi;BCA;GIP
Psme3	12.2627	11.6206	10.3175	10.5619	10.5119	10.5774	6.96861e-08	C1;J;N;T	Negative	P1;P12;P4;P60	Unclassified	Bi;BRB;BCA;CPGD;CCDB;EPRSS;GIP;Mem;Met
Meis3	6.41744	8.92538	9.55057	9.55167	9.27366	10.2308	6.97362e-08	D;U	Positive	P1;P60	Unclassified	Bi;CPGD;EPRSS;GIP
Atp6v0d1	9.98	11.23	11.87	11.58	11.44	11.78	6.9967e-08	A;D;U	Positive	E15.5_Ngn3_Het;P1;P60	IPS;ITH;VTSC	ACAM;Bi;CCDB;DPR;Di;EPRSS;IS;LT;Mem;Or;SP
Ccnd3	11.6125	11.3381	9.62285	9.70607	9.47962	9.7863	7.03619e-08	C1;J;T	Negative	P1;P12;P60	IPS;PTSKA	ACAM;Bi;BCA;CPGD;Di;EPRSS;GIP;IS;Mem;Met
St14	12.1642	11.6544	10.2456	10.3928	10.5736	9.95831	7.05649e-08	C1;J;T	Negative	P1;P12;P60	Unclassified	ACAM;Bi;BCA;CCDB;DPR;Di;Mem;Or
Cgn	12.1539	11.5459	10.1121	10.5688	10.5679	10.008	7.07608e-08	C1;J	Negative	P1;P60	PTSKA	ACAM;Bi;BCA;CCDB;Di;EPRSS;Or
Npm3	10.3243	9.5625	7.85287	7.42989	7.58528	6.98324	7.07917e-08	C1	Negative	P60	Unclassified	Bi;GIP
Rhag	7.24527	4.93843	1.46411	1.19499	0	0	7.10065e-08	C1;J;T	Negative	P1;P12;P60	ITH	Bi;BRB;DPR;LT;Mem;Met
Rpl34-ps1	11.5434	10.7214	10.0341	9.54611	9.75769	9.39788	7.14849e-08	C1;N	Negative	P4;P60	Unclassified	GIP;Met
Tulp4	10.5986	11.6157	12.3574	12.4012	12.1698	12.0291	7.17542e-08	D	Positive	P1	Unclassified	CCDB;EPRSS;Met
Marveld2	11.1714	10.8726	9.3474	9.13048	8.80072	8.45059	7.17731e-08	C1;J	Negative	P1;P60	Unclassified	ACAM;Bi;DPR;Mem;Or;SP
Relt	7.00595	8.34877	9.76935	10.296	10.3761	9.57971	7.19573e-08	D;O	Positive	P1;P12	Unclassified	Bi;CCDB;Mem;Or
Pld4	8.65843	9.37038	2.05664	3.39123	5.56938	0.333333	7.20305e-08	C1	Negative	P60	VTSC	BCA;DPR;LT;Mem;Met;Or
Myo6	10.808	11.7584	12.5208	12.4833	12.5784	12.3044	7.30536e-08	D;O	Positive	P1;P12	ITH;VTSC	ACAM;Bi;BRB;BCA;CCDB;DPR;EPRSS;GIP;LT;Mem;Met;Or;SP
Kcng3	2.05664	2.39989	7.98872	7.86642	8.57867	7.45794	7.32734e-08	D;F;O;P	Positive	P1;P12	ITH;MPIC	Bi;CCDB;LT;Mem;SP
Polr1a	12.0533	11.3463	10.3529	10.3274	10.3333	10.0015	7.36667e-08	C1;J	Negative	P1;P60	Unclassified	Bi;GIP;Met
Slc18a1	5.58072	7.50044	9.93839	9.40016	8.43567	9.51991	7.37527e-08	D	Positive	P1	VTSC	LT;Mem;Or
Otud3	10.5326	9.50376	8.37632	8.18085	7.94707	8.14115	7.40131e-08	J	Negative	P1	Unclassified	Bi;BCA;Met
Gins2	9.97663	8.9768	6.4141	7.44458	7.09266	6.0783	7.44318e-08	C1	Negative	P60	Unclassified	Bi;CPGD;GIP
Efcab4a	9.37127	8.14174	5.63028	5.90108	6.44283	3.12211	7.50726e-08	C1	Negative	P60	CMP;ITH	Bi;CCDB;LT
Scn8a	5.94578	8.22999	9.0674	9.48045	9.39362	9.9057	7.56021e-08	D	Positive	P1	ITH;MPIC	Bi;BRB;DPR;EPRSS;LT;Mem;SP
E530001K10Rik	0	3.02471	7.51134	7.45289	6.29923	8.53922	7.56313e-08	U	Positive	P60
Igfbp7	8.64049	8.82046	10.6989	11.3122	11.4385	9.85201	7.57697e-08	O	Positive	P12
Lap3	11.3662	10.8307	9.50603	9.43389	9.30442	9.36493	7.59738e-08	C1;J;T	Negative	P1;P12;P60	OMPFAA;VTSC	Bi;CCDB;GIP;Met;Or
Aif1l	9.36988	9.60491	4.36193	5.91857	6.00339	0	7.59776e-08	C1	Negative	P60	CMP	ACAM;Bi;CCDB;Mem;Or
Gstcd	10.4321	9.66898	7.88941	8.02101	7.84321	7.20271	7.68052e-08	C1;J	Negative	P1;P60	Unclassified	Bi;BCA;GIP;Or
Kcnip3	2.3	7.28	7.01	7.28	7.53	6.79	7.6969e-08	A;D;O	Positive	E15.5_Ngn3_Het;P1;P12	ITH;MPIC	Bi;BCA;CPGD;CCDB;EPRSS;GIP;LT;Mem;Or;SP
Ahi1	7.73	9.69	10.27	10.28	9.99	10.44	7.75137e-08	A;D	Positive	E15.5_Ngn3_Het;P1	VTSC	ACAM;Bi;CCDB;DPR;GIP;LT;SP
Wsb1	11.3391	12.0397	9.87108	9.23899	9.0101	8.35421	7.79046e-08	C1	Negative	P60	Unclassified	EPRSS;Met
Atp5o	12.1028	11.5965	10.5846	10.26	10.1547	10.0389	7.81408e-08	C1;J;N;T	Negative	P1;P12;P4;P60	GGPMTC;ITH;OOMA	Bi;Di;LT;Mem;Met
Rfc5	11.1533	10.3614	9.27809	9.58227	9.25013	7.86201	7.86868e-08	C1	Negative	P60	Unclassified	Bi;CPGD;GIP
Stard13	12.0777	11.1611	10.4058	10.5623	10.3925	9.99709	7.88793e-08	C1;J;T	Negative	P1;P12;P60	GGA	Bi;BCA;CCDB;EPRSS;Mem;Or
Ints7	11.2109	10.5075	9.29509	9.40294	9.38006	8.55722	7.92856e-08	C1	Negative	P60	Unclassified	Bi;CPGD;EPRSS;GIP
Camk2n2	5.94311	8.48913	9.18105	9.39963	9.05904	9.96504	7.93521e-08	D	Positive	P1	Unclassified	Bi;BCA;CCDB;GIP;Met
Cct3	13.2651	13.0076	11.652	11.3674	11.218	10.944	7.9364e-08	C1;J;N	Negative	P1;P4;P60	Unclassified	Bi;BCA;CCDB;DPR;GIP;Mem;Met;Or
Tmem108	5.36343	8.57984	9.33553	9.1197	8.74453	7.67937	7.96175e-08	D	Positive	P1	Unclassified	Mem
Stip1	12.6948	12.5861	10.7937	10.936	10.5958	10.7823	7.96863e-08	C1;J;N;T	Negative	P1;P12;P4;P60	Unclassified	ACAM;Bi;CCDB;DPR;Di;GIP
Gm9755	10.9772	10.3243	8.69579	9.07736	8.7082	9.11002	7.99755e-08	C1;J	Negative	P1;P60	GGA	Bi;BCA;GIP
2310022B05Rik	10.5587	12.019	12.4247	12.3311	12.1409	10.8054	7.99971e-08	E	Positive	P1	Unclassified	CCDB
Gria2	3.95679	9.06039	7.30654	7.48073	6.95266	9.96714	8.00838e-08	W	Positive	P60
C1qtnf6	8.56966	10.2648	11.5238	10.9667	10.1774	7.4384	8.04041e-08	E	Positive	P1
Meis1	11.04	10.3989	8.69884	9.23767	9.04395	8.80182	8.0531e-08	C1;J;T	Negative	P1;P12;P60	Unclassified	Bi;DPR;GIP;IS
Gm5648	9.53083	8.20901	5.66079	6.79613	6.34391	4.66124	8.06341e-08	C1	Negative	P60
Acsl6	4.21	8.11	7.66	8.16	8.46	8.62	8.12981e-08	A;M;U	Positive	E15.5_Ngn3_Het;P4;P60	IPS;ITH	Bi;BCA;CCDB;DPR;EPRSS;GIP;LT;Mem;Met;Or
Gypa	7.23201	3.77995	1.66667	3.26643	0	0	8.1326e-08	Singleton	Negative	P12
Gm13826	12.4189	11.8142	10.9449	10.402	10.4846	10.8837	8.17367e-08	C1;N	Negative	P4;P60	Unclassified	GIP;Met
Ptcd3	11.037	10.5095	9.17396	8.96672	8.76704	8.62458	8.17928e-08	C1;J;N	Negative	P1;P4;P60	Unclassified	Bi;BCA;CCDB;GIP;Or
Cks1b	11.0514	10.1767	9.08319	9.31435	9.0321	8.70317	8.18694e-08	C1;J;T	Negative	P1;P12;P60	Unclassified	Bi;BCA;CPGD;CCDB;Di;Met
Pfas	11.5364	10.7998	9.68186	9.90294	9.84526	9.11645	8.1922e-08	C1;J	Negative	P1;P60	OMPFAA	Bi;BCA;EPRSS;Met;Or
Gdi1	11.39	12.98	13.14	12.85	12.69	13.01	8.19227e-08	A;D;U	Positive	E15.5_Ngn3_Het;P1;P60	GGA	Bi;BCA;CCDB;DPR;EPRSS;LT;Or
Slc37a4	9.34554	10.0636	11.7982	11.243	11.103	10.7617	8.22309e-08	D;U	Positive	P1;P60	ITH;OOMA	ACAM;BRB;BCA;DPR;EPRSS;LT;Mem;Met;Or;SP
Slc25a48	7.92701	6.49941	2.10731	2.88726	3.58663	1.19499	8.23123e-08	C1	Negative	P60	Unclassified	LT;Mem
Aspm	11.0892	10.4924	9.46641	9.07609	9.26616	6.77974	8.26234e-08	C1	Negative	P60	Unclassified	ACAM;Bi;BRB;CPGD;CCDB;DPR;EPRSS;GIP
Reg2	0	0	3.54312	4.61333	12.7801	3.83824	8.29066e-08	Singleton	Positive	P12
Cpeb4	9.76	11.12	11.63	11.5	11.31	11.1	8.34941e-08	A;D	Positive	E15.5_Ngn3_Het;P1	GGPMTC	ACAM;Bi;CPGD;EPRSS;GIP;Or;SP
Fsd1l	7.52786	9.33896	10.4282	10.3303	9.95614	9.63748	8.36681e-08	D	Positive	P1	Unclassified	Bi;CCDB
Rpl10a	12.0467	11.5444	10.7264	10.025	10.0513	10.0655	8.39291e-08	C1;J;N	Negative	P1;P4;P60	Unclassified	Bi;CCDB;GIP;Mem;Met;Or
Clec7a	7.74954	7.94116	0	0.666667	1.93578	0.666667	8.42035e-08	J	Negative	P1	VTSC	ACAM;Bi;CCDB;Di;EPRSS;IS;LT;Mem;Or
Plch2	9.77976	9.78283	7.37926	5.56155	5.56953	3.2049	8.44473e-08	C1	Negative	P60	Unclassified	Bi;BCA;EPRSS;Met
Gm13093	0	4.60819	8.02059	7.25682	6.79029	4.67181	8.45676e-08	D	Positive	P1
Prmt7	11.0365	10.3549	9.05441	9.04832	8.98347	8.79812	8.48431e-08	C1;J	Negative	P1;P60	Unclassified	Bi;BCA;CCDB;DPR;GIP;Mem;Met
Foxo1	9.65403	10.9569	11.8323	11.5885	11.3018	9.92368	8.50386e-08	E	Positive	P1	PTSKA	BRB;BCA;CCDB;DPR;EPRSS;GIP;Met
Lrrc24	1.52832	5.43991	7.02201	7.34391	6.81117	8.63228	8.51015e-08	D;U	Positive	P1;P60	Unclassified	Bi;CCDB;Mem
Rpl26	10.6769	10.4158	8.93767	7.56037	7.35552	8.53745	8.51199e-08	N;T	Negative	P12;P4	Unclassified	CCDB;GIP;Met
Rpl30	11.7885	11.3705	9.9813	10.1291	9.43189	10.3525	8.51988e-08	T	Negative	P12	Unclassified	CCDB;GIP
Ckap2l	10.8138	10.0578	9.00868	8.76275	8.75546	6.99564	8.6682e-08	C1	Negative	P60	Unclassified	CPGD;CCDB
Gar1	10.1734	9.42921	7.57953	7.21047	7.28947	6.60557	8.68779e-08	C1;J	Negative	P1;P60	Unclassified	GIP
Podxl2	7.19338	9.21629	10.4063	10.2152	9.25478	9.86235	8.69592e-08	D	Positive	P1	Unclassified	Bi
Hbb-bs	10.9405	10.0376	9.49248	9.36359	8.77164	5.70396	8.75572e-08	C1	Negative	P60	OOMA;VTSC	Bi;CCDB;Di;LT;Met
Arhgap11a	11.4537	10.7099	10.1422	9.81635	9.55558	7.92905	8.91588e-08	C1	Negative	P60	GGA	BRB;BCA;EPRSS
Rpl14-ps1	13.8836	13.2013	12.4108	11.8686	11.9422	11.7044	8.91884e-08	N	Negative	P4
Zwilch	10.2303	9.49735	7.59334	7.85583	7.17963	6.3624	8.97598e-08	C1	Negative	P60	Unclassified	Bi;CPGD;GIP
Mrto4	10.4212	9.63747	8.10016	7.85415	7.82989	7.48208	9.00512e-08	C1;J	Negative	P1;P60	Unclassified	CCDB;GIP;Mem
Adamts19	8.30737	7.74385	2.70976	4.1232	3.52075	0	9.05419e-08	C1	Negative	P60	Unclassified	Bi;BCA;CCDB;Met
Cnnm1	3.42226	4.24659	8.24503	8.46699	7.71038	10.1656	9.09234e-08	U	Positive	P60	Unclassified	Bi;Mem
Slc40a1	9.8222	10.471	11.321	11.6299	12.2376	11.1411	9.11394e-08	O	Positive	P12	Unclassified	Mem
Col9a1	7.78028	9.17526	1.96896	2.83062	0.528321	0	9.11546e-08	C1;T	Negative	P12;P60	Unclassified	ACAM;BRB;CCDB
8430419L09Rik	12.4348	12.2019	10.6858	10.6008	10.5908	10.3009	9.17145e-08	C1	Negative	P60	Unclassified	Mem
Ppp2r5d	11.7025	11.1332	10.0381	10.0169	9.82925	9.42546	9.17726e-08	C1;T	Negative	P12;P60	GGPMTC;IPS;OMPFAA;PTSKA	Bi;BCA;CPGD;CCDB;DPR;EPRSS;GIP;IS;Met
Adam23	3.68	9.44	8.13	7.66	6.87	5.64	9.19504e-08	A	Positive	E15.5_Ngn3_Het	Unclassified	BCA
Lzts3	10.6647	9.69028	8.29249	8.59929	8.40417	8.75719	9.22748e-08	J	Negative	P1	Unclassified	ACAM;CCDB;Mem
Fry	7.39003	8.57358	10.2105	10.1749	10.1488	10.4653	9.24092e-08	D;U	Positive	P1;P60	Unclassified	CPGD;CCDB
Notum	7.57131	6.4957	0	2.77398	1.54795	0	9.26767e-08	C1	Negative	P60	Unclassified	BCA
Blm	10.5362	10.0157	8.53404	8.17449	7.81779	6.47283	9.27234e-08	C1	Negative	P60	PTSKA	Bi;CPGD;CCDB;EPRSS;GIP;IS
Dnm3	4.41031	5.21175	8.34023	8.65469	9.06594	10.1551	9.2796e-08	K;U	Positive	P4;P60	CMP;VTSC	ACAM;Bi;BCA;CCDB;DPR;IS;LT;SP
Casc5	10.7947	10.1017	8.96242	8.80052	8.68921	6.73392	9.31491e-08	C1	Negative	P60	VTSC	Bi;BCA;CPGD;CCDB;GIP;LT;Or
Fam102a	10.5174	11.1949	12.1256	12.3045	12.3842	12.0951	9.38051e-08	D	Positive	P1
Cdkl2	6.72692	8.98717	9.51072	9.75901	9.46957	10.3747	9.39376e-08	D;U	Positive	P1;P60	PTSKA	Bi;BCA;CCDB;GIP;Met
Mvp	8.0051	9.0978	10.2964	10.3686	10.5342	10.9787	9.42008e-08	D;U	Positive	P1;P60	PTSKA	Bi;BCA;CPGD;CCDB;EPRSS;GIP;Mem;Met;Or
Pcbp3	7.51773	8.53277	10.2368	10.3879	10.2623	10.3299	9.44099e-08	D;U	Positive	P1;P60	Unclassified	CCDB;GIP
Fmod	7.85023	6.31812	1.36249	3.16395	3.88129	0	9.45601e-08	C1	Negative	P60	Unclassified	Bi;CCDB;DPR;Di;Met
Moxd1	8.26973	7.02271	3.35491	4.09744	3.96393	0.666667	9.46695e-08	C1	Negative	P60	OOMA	Bi;BCA;Mem;Met
Fhad1	5.13231	7.94616	9.10577	9.10633	8.65858	8.05955	9.46936e-08	D	Positive	P1	Unclassified	Bi
Gm6166	9.95319	8.84455	7.35357	7.36893	6.68803	5.89851	9.52494e-08	C1	Negative	P60
Rab32	8.99231	9.1592	3.96896	4.83881	5.09194	1.63563	9.5285e-08	C1	Negative	P60	GGA	Bi;BCA;CCDB;DPR;EPRSS;GIP;IS;LT;Mem;Or
Paqr5	7.83894	6.81611	2.32576	3.05664	1.63563	2.32576	9.71337e-08	C1;J;T	Negative	P1;P12;P60	Unclassified	Bi;DPR;EPRSS;Mem
Traip	9.44306	8.37185	5.81172	6.22291	6.13127	4.55393	9.72497e-08	C1	Negative	P60	Unclassified	Bi;BCA;CCDB;EPRSS;GIP;Mem;Met
Epha1	9.64073	9.04946	6.33253	6.58359	5.98328	4.13823	9.75184e-08	C1	Negative	P60	GGA;PTSKA	ACAM;Bi;BRB;BCA;CPGD;CCDB;DPR;EPRSS;Mem;Met
Gm15915	9.31593	8.2851	6.50177	6.05737	5.80534	0	9.78783e-08	C1	Negative	P60
Plac1	7.17111	5.64386	0	0	0.333333	0	9.81096e-08	J	Negative	P1	Unclassified	CCDB;DPR
Ttk	10.0486	9.23743	7.45726	7.22359	7.13362	5.59607	9.8272e-08	C1	Negative	P60	PTSKA	Bi;BCA;CPGD;GIP;Mem;Met
Gm3531	11.8109	11.4207	10.4552	9.87573	9.62463	9.83159	9.83121e-08	N	Negative	P4
Tmtc1	5.8707	9.18459	9.72498	8.92251	8.22663	9.28778	9.83377e-08	D	Positive	P1	Unclassified	Bi;Mem;Met
Serpini1	11.1011	10.6163	8.92772	7.70414	8.89936	11.1292	9.89741e-08	Singleton	Negative	P4
Ddr1	11.3365	12.5316	13.0178	13.1981	12.981	12.1521	9.9142e-08	D;E;K;O	Positive	P1;P12;P4	PTSKA	ACAM;Bi;CPGD;CCDB;DPR;EPRSS;LT;Met;Or
Rps9	14.1115	13.575	12.4841	12.0994	12.1857	11.8236	9.93409e-08	C1;J;N	Negative	P1;P4;P60	Unclassified	Bi;CPGD;CCDB;GIP;Mem;Met;Or
Rpsa	13.4376	12.7054	12.0042	11.4928	11.5395	11.555	9.94462e-08	C1;J;N	Negative	P1;P4;P60	Unclassified	Bi;CCDB;GIP;LT;Mem;Met
Foxj1	8.89469	7.85609	5.59447	4.69825	4.25895	3.80313	1.00144e-07	C1;N;T	Negative	P12;P4;P60	GGA	ACAM;BRB;BCA;CCDB;DPR;EPRSS;GIP;IS
Phldb1	11.5383	11.3945	9.73963	9.92248	9.36697	8.69048	1.00509e-07	C1	Negative	P60	Unclassified	Bi
Fn1	12.1324	12.1334	11.3877	10.5387	9.87166	4.09107	1.00823e-07	B1;C1	Negative	P60	Unclassified	Bi;BCA;CPGD;CCDB;DPR;Di;EPRSS;Mem
Lbr	11.644	11.0324	9.95551	9.91388	10.0015	9.14228	1.01065e-07	C1	Negative	P60	OOMA	Bi;BCA;CCDB;GIP;Mem;Met
Magee1	6.11251	8.37244	9.09694	9.52563	9.29307	10.0102	1.01311e-07	D	Positive	P1	Unclassified	Bi;CCDB;GIP;Mem;SP
Egr2	9.6402	8.72209	6.77447	5.64872	4.99812	8.07012	1.01446e-07	S	Negative	P12
Ms4a6c	8.0008	9.05311	0.333333	1.96896	4.20705	0	1.01803e-07	Z	Negative	P60	Unclassified	Mem
Kcnd3	8.31434	6.95809	3.52957	4.19311	4.26643	1.10731	1.01863e-07	C1	Negative	P60	ITH;MPIC	Bi;CCDB;LT;Mem;Or;SP
Iqgap3	10.6673	10.0334	8.36706	8.76253	8.66139	6.21758	1.02031e-07	C1	Negative	P60	GGA;PTSKA	ACAM;Bi;BRB;BCA;CPGD;CCDB;DPR;EPRSS;GIP;Mem
Emr1	7.82591	9.38378	0	1.63563	3.45762	2.21462	1.02325e-07	J;Z	Negative	P1;P60	GGA	Bi;EPRSS;Mem
Hat1	10.9121	10.3587	8.61653	8.99801	8.65938	8.90102	1.02398e-07	C1;J	Negative	P1;P60	Unclassified	Bi;BCA;CCDB;EPRSS;GIP
Hjurp	12.6006	11.9146	10.9024	11.1048	11.0061	10.1513	1.02501e-07	C1	Negative	P60	Unclassified	Bi;CPGD;CCDB;GIP
Lsm2	10.1718	9.46178	7.24754	7.30988	7.45483	7.12279	1.02746e-07	C1;J;N	Negative	P1;P4;P60	Unclassified	Bi;GIP;Met
C1qb	7.92826	9.48486	0.861654	1.52832	3.51947	3.41913	1.03081e-07	J	Negative	P1	Unclassified	Bi;CCDB;Di;EPRSS;IS;Met
Snrpd1	10.7168	10.2929	8.57956	8.41594	8.1682	8.17062	1.03256e-07	C1;N	Negative	P4;P60	Unclassified	Bi;BCA;CCDB;GIP;IS;Met
Pola2	10.5359	9.76361	8.11547	8.48675	8.19611	7.42298	1.03538e-07	C1	Negative	P60	Unclassified	Bi;CPGD;CCDB;GIP;LT;Met
1700011H14Rik	9.72897	9.8203	6.57804	6.48172	5.76787	2.63563	1.03675e-07	C1	Negative	P60
Zbtb4	9.25847	10.176	11.0667	11.2418	11.2855	10.9199	1.04037e-07	D;O;U	Positive	P1;P12;P60	Unclassified	Bi;EPRSS;GIP
Dll1	10.5412	10.4004	8.33508	8.00707	7.81255	5.94964	1.04237e-07	C1	Negative	P60	CMP	ACAM;Bi;CCDB;DPR;Di;EPRSS;GIP;IS;Mem
Cybb	8.92322	9.47459	2.3023	3.73076	6.29591	3.86509	1.04681e-07	C1;J	Negative	P1;P60	OOMA	Bi;BCA;DPR;EPRSS;IS;Met;Or;SP
Gadl1	10.2614	9.24813	7.62363	7.51907	7.65411	8.13459	1.0527e-07	J	Negative	P1	OMPFAA	Bi;BCA;Met
Gm684	7.73285	6.74919	0.528321	2.72331	3.12211	0	1.05447e-07	Predicted_contaminant
Cnot6l	11.4844	13.1924	13.4663	13.1368	12.8066	11.7762	1.06116e-07	B;E	Positive	E15.5_Ngn3_Het;P1	Unclassified	Bi;BRB;BCA;CCDB;GIP
Pdgfrl	4.52091	7.2194	8.70332	8.54924	8.22021	8.84713	1.06498e-07	D	Positive	P1	Unclassified	Bi;CCDB
Hs6st2	8.9128	7.5201	4.43307	5.56129	5.81947	2.44064	1.0653e-07	C1	Negative	P60	OMPFAA	BCA;DPR;Di;Mem;Met;Or
Gpsm2	10.7128	10.0505	9.04293	8.59566	8.31255	6.92355	1.07332e-07	C1	Negative	P60	Unclassified	Bi;BRB;BCA;CPGD;CCDB;DPR;GIP
Ddx11	10.0652	9.30974	7.38411	7.24029	7.25443	5.85622	1.08026e-07	C1	Negative	P60	Unclassified	Bi;CPGD;GIP;Met
Ctss	8.7954	9.69886	1.33333	3.85977	6.19939	3.95421	1.08183e-07	J	Negative	P1	Unclassified	Bi;BCA;EPRSS;IS;Met;Or
Hebp1	9.63748	9.37011	6.25421	6.29003	6.04136	3.59976	1.08499e-07	C1	Negative	P60	GGA	Bi;CCDB;EPRSS;Met;Or
Rbbp8nl	7.40894	6.14592	0.333333	1.70976	1.93578	0	1.0906e-07	C1	Negative	P60	Unclassified	CCDB
Scn1b	3.27657	3.31221	8.12522	9.05869	8.37729	8.02119	1.09749e-07	D;F;K	Positive	P1;P4	ITH;MPIC	Bi;BRB;DPR;LT;Mem;SP
Nop16	10.489	9.78709	8.08008	8.2191	7.95411	7.81465	1.09974e-07	C1	Negative	P60	Unclassified	GIP
Mgst2	7.98886	6.40472	0.861654	3.70976	4.72127	1	1.10049e-07	C1;J	Negative	P1;P60	OOMA;OMPFAA	BCA;EPRSS;GIP;Mem;Met;Or
Elovl7	9.81155	9.39805	6.55518	6.41603	6.56948	5.34539	1.11268e-07	C1	Negative	P60	OMPFAA	Bi;BCA;Mem;Met
Hnrnpa0	13.1409	12.8632	11.4875	11.4057	11.3182	10.6024	1.11273e-07	C1	Negative	P60	Unclassified	Bi;EPRSS;GIP
Eda2r	8.26992	7.3376	3.73322	3.44327	4.10373	0.333333	1.11546e-07	C1	Negative	P60	Unclassified	Bi;CPGD;DPR;EPRSS;GIP;Mem
Spry1	9.77482	8.82201	6.293	6.92981	7.24218	4.78328	1.11586e-07	C1	Negative	P60	GGA	Bi;BCA;CPGD;CCDB;DPR;Di;EPRSS;Mem;Met
Stk32b	6.53236	7.34021	10.2913	10.2453	9.10979	9.66849	1.12756e-07	D	Positive	P1	PTSKA	Bi;BCA;Met
Snap91	2.86165	6.74247	7.25136	7.3922	6.68144	9.71603	1.12857e-07	U	Positive	P60	Unclassified	Unclassified
Ttll12	10.9249	10.227	9.02309	8.99875	8.72701	8.7094	1.13284e-07	J	Negative	P1	Unclassified	Met
Cxx1b	8.08975	9.41565	10.4645	10.5516	9.87294	11.1932	1.13416e-07	U	Positive	P60
Daam1	10.04	11.0301	11.8942	11.7613	11.6622	11.267	1.13866e-07	D;O	Positive	P1;P12	Unclassified	Bi;CCDB;EPRSS;Mem
Acnat1	7.83798	6.45685	0.773976	3.25163	4.13646	0	1.15264e-07	C1	Negative	P60	OMPFAA	BCA;CCDB;Met;Or
Kcnn3	1	2.95679	6.751	7.78983	7.29939	8.27737	1.15728e-07	D;U	Positive	P1;P60	IPS;ITH;MPIC	ACAM;Bi;CCDB;LT;Mem;SP
Camsap3	11.4596	10.8998	9.79952	9.76118	9.59777	9.00155	1.1609e-07	C1;J	Negative	P1;P60	Unclassified	ACAM;Bi;BCA;CCDB;EPRSS;GIP;LT;Met
Lrrc59	13.7124	12.7561	11.6889	12.1591	12.0395	12.1365	1.16794e-07	J	Negative	P1	Unclassified	CCDB;GIP;LT;Mem;Or
Khdrbs3	7.88804	9.48397	10.1141	10.3846	10.3313	10.4074	1.16838e-07	D	Positive	P1	Unclassified	Bi;BCA;GIP
Cilp	1.33333	4.20705	7.81545	7.2419	7.79114	5.59148	1.16947e-07	D	Positive	P1	Unclassified	Bi;CCDB;EPRSS
Prim1	10.5929	9.84331	8.15376	8.5989	8.37643	7.83581	1.17129e-07	C1;J	Negative	P1;P60	Unclassified	Bi;CPGD;GIP;Mem;Met
Magi3	10.6347	10.477	8.16442	8.23743	8.24565	7.1504	1.17199e-07	C1	Negative	P60	GGA;PTSKA	ACAM;Bi;BCA;EPRSS;GIP;Mem;Met
Spr	10.457	9.60841	7.63527	8.11238	8.33968	8.25319	1.17438e-07	C1;J	Negative	P1;P60	OOMA;OMPFAA	BCA;CPGD;CCDB;DPR;GIP;Met;Or
Tyrobp	8.00649	8.75274	1.33333	2.25163	3.60991	1.05664	1.17487e-07	C1;J;Z	Negative	P1;P60	PTSKA	Bi;DPR;EPRSS;IS;Mem
Dhfr	10.454	9.88507	8.04556	8.37014	7.62871	7.19364	1.17632e-07	C1;J;T	Negative	P1;P12;P60	OOMA;OMPFAA	Bi;BCA;CCDB;EPRSS;GIP;Met
Sarm1	5.26643	7.61775	8.94925	8.93723	8.86743	9.16376	1.18118e-07	D	Positive	P1	GGPMTC	ACAM;Bi;CPGD;CCDB;DPR;EPRSS;IS;Mem;SP
Pole3	10.5621	9.78968	7.85831	8.17063	8.3689	8.8884	1.18193e-07	J	Negative	P1	Unclassified	Bi;BCA;GIP;Met;Or
C1qc	7.9316	9.37317	0.935785	1.83062	3.44884	3.49326	1.18909e-07	J	Negative	P1	Unclassified	Bi;CCDB;Di;EPRSS;IS;Met
Adss	11.3162	10.99	9.48959	9.34358	9.34052	9.12263	1.19971e-07	C1;J;T	Negative	P1;P12;P60	OMPFAA	Bi;BCA;CCDB;EPRSS;Mem;Met
Sftpd	4.29472	4.9766	9.09659	8.7956	6.36482	11.6787	1.203e-07	Y	Positive	P60
Prr11	10.2827	9.60775	8.24545	7.82389	7.57772	5.32576	1.20489e-07	C1	Negative	P60	Unclassified	CCDB;Mem
Clcn5	11.4046	11.5505	9.84783	9.51099	8.9466	8.76633	1.20897e-07	C1;J;T	Negative	P1;P12;P60	ITH;MPIC	Bi;LT;Mem;Or
Mapre2	10.3082	10.9327	12.0746	12.2364	11.9754	11.6052	1.21487e-07	D	Positive	P1	Unclassified	CPGD;CCDB;Or
Msr1	7.53041	8.69037	0.773976	0	1.88129	0.333333	1.21488e-07	C1;J;N;Z	Negative	P1;P4;P60	VTSC	BRB;CCDB;DPR;EPRSS;LT;Mem;Or
Rad51ap2	0	3.67872	6.95595	7.05096	7.32767	6.8322	1.21627e-07	D	Positive	P1
Dna2	10.163	9.49384	7.55056	7.97734	7.05828	5.8241	1.22139e-07	C1	Negative	P60	Unclassified	Bi;BCA;CPGD;CCDB;GIP
Ptges	3.31709	3.43307	7.29804	8.36308	8.89846	9.62982	1.23166e-07	D;U	Positive	P1;P60	OOMA;OMPFAA	BCA;CPGD;CCDB;EPRSS;Mem;Met
Fam13a	8.91233	7.60095	4.48822	4.93863	6.76676	0.666667	1.23407e-07	C1	Negative	P60
Sdad1	11.277	10.6236	9.47886	9.62819	9.51302	8.63023	1.23436e-07	C1;N	Negative	P4;P60	Unclassified	CCDB;GIP;LT
Upp1	4.34	7.64	8.87	8.02	7.69	8.6	1.24264e-07	A;D	Positive	E15.5_Ngn3_Het;P1	GGPMTC	BCA;EPRSS;Met
Fads2	10.7767	10.3028	8.89495	8.67705	8.75951	6.53005	1.243e-07	C1	Negative	P60	OOMA;OMPFAA	Bi;BCA;EPRSS;Mem;Met
Slc35f2	8.26881	7.56196	3.49728	3.3023	4.11477	1.3023	1.24985e-07	C1	Negative	P60	Unclassified	LT;Mem
Fosl2	11.2686	10.7007	9.82515	9.80807	8.45946	9.15447	1.25014e-07	T	Negative	P12	Unclassified	EPRSS
Ghrl	1.70976	11.4899	6.46271	6.01446	2.79744	0.528321	1.25039e-07	C	Positive	E15.5_Ngn3_Het
Gpx1	11.9429	11.2145	10.0696	9.99442	9.99418	11.653	1.2516e-07	C1;J;S;T	Negative	P1;P12;P60	OOMA	Bi;BRB;CPGD;CCDB;DPR;EPRSS;IS;Met;Or
Mapk15	7.32049	9.44425	9.86773	10.2501	10.3643	8.09267	1.25512e-07	E;O	Positive	P1;P12	Unclassified	Met;Or
Haus6	10.5871	9.93143	8.39793	8.46201	8.37396	7.27599	1.25752e-07	C1	Negative	P60	Unclassified	CPGD;CCDB;GIP
Cdkn2b	1.52832	5.5584	7.89595	6.46349	6.64929	7.76287	1.26547e-07	D;U	Positive	P1;P60	PTSKA	Bi;BCA;CPGD;EPRSS;GIP;Met
Gstt3	8.82157	7.62759	4.38573	4.82304	5.72522	3.27126	1.26626e-07	C1	Negative	P60	OOMA	Bi;BCA;Di;Met
Abce1	12.956	12.3899	11.2647	11.2312	11.1723	11.1762	1.27326e-07	C1;J	Negative	P1;P60	Unclassified	Bi;BCA;CCDB;Mem
Chek1	10.2156	9.50048	6.94998	8.00994	7.54218	7.32094	1.27388e-07	C1;J;T	Negative	P1;P12;P60	PTSKA	Bi;BCA;CPGD;CCDB;Di;EPRSS;GIP;Met
Creb3l4	8.10599	6.92146	2.96896	3.73322	3.72143	2.00746	1.27597e-07	C1;J	Negative	P1;P60	IPS	DPR;Di;EPRSS;GIP;LT;Mem;Or
Nucks1	12.8631	12.2683	11.4963	11.1472	11.1874	10.3114	1.27804e-07	C1	Negative	P60	Unclassified	CCDB;GIP
Cma1	7.0483	5.3332	0	0	0.528321	0	1.2875e-07	C1;J	Negative	P1;P60	VTSC	Bi;BRB;BCA;CCDB;DPR;EPRSS;Met;Or
Slc5a9	9.6253	9.52024	5.65941	6.51476	5.08447	6.13092	1.28871e-07	C1;J	Negative	P1;P60	ITH	LT
Tmem198	5.16457	7.22823	8.53421	9.09601	8.95037	9.41493	1.28934e-07	D;U	Positive	P1;P60	VTSC	EPRSS;Mem;Or
Chd5	3.56275	5.38046	7.6376	8.47096	8.38201	8.6635	1.28972e-07	D;U	Positive	P1;P60	Unclassified	Bi;BCA;CPGD;CCDB;DPR;EPRSS;GIP;Mem;Met
Mtap	10.6138	9.80668	8.29778	8.39158	8.33435	8.78043	1.2906e-07	J;T	Negative	P1;P12	OMPFAA	BCA;CCDB;EPRSS;GIP;Met
Cdk6	9.21443	8.49275	5.76908	5.8522	5.7766	1.63563	1.29225e-07	C1	Negative	P60	IPS;PTSKA	Bi;BRB;BCA;CPGD;CCDB;DPR;Di;EPRSS;GIP;IS;Met
Raly	12.4738	12.2363	10.8423	10.6219	10.6778	10.421	1.29539e-07	C1	Negative	P60	Unclassified	Bi;GIP
Ptgs2	8.12453	8.31464	3.43876	3.49728	0.666667	1.60245	1.30094e-07	C1;J;T	Negative	P1;P12;P60	OOMA;OMPFAA	Bi;BRB;BCA;CPGD;DPR;Di;EPRSS;LT;SP
Tmem184b	9.78776	10.968	11.6143	11.6023	11.2128	11.1303	1.30588e-07	D	Positive	P1	Unclassified	Mem
Suv39h1	10.875	10.2166	8.93433	8.96323	8.76018	8.41925	1.30727e-07	C1;J	Negative	P1;P60	OMPFAA	Bi;BRB;BCA;CPGD;CCDB;DPR;GIP;Met
Lipc	7.92874	6.82403	3.35894	3.34813	2.64555	0.666667	1.30921e-07	C1	Negative	P60	OMPFAA	Bi;BRB;BCA;CCDB;LT;Met
Rqcd1	11.5946	11.0232	9.80505	9.95536	9.84111	9.53764	1.30954e-07	C1;J;N	Negative	P1;P4;P60	Unclassified	Bi;BRB;CCDB;EPRSS;GIP;Mem;Met
Gm7536	12.5553	11.9671	10.9187	10.5015	10.9475	11.2183	1.31421e-07	J;N	Negative	P1;P4	Unclassified	CCDB;GIP
Clspn	10.3655	9.53464	7.72511	8.63686	7.81695	6.5728	1.3328e-07	C1	Negative	P60	Unclassified	Bi;BCA;CPGD;GIP;Met
Pdzd4	6.25925	8.20451	8.99073	9.4335	9.70829	10.0652	1.33509e-07	D;U	Positive	P1;P60	Unclassified	Bi;CCDB
Cnp	10.8229	10.2622	8.94503	8.72304	8.88312	7.50042	1.33869e-07	C1	Negative	P60	Unclassified	Bi;BRB;BCA;CCDB;DPR;EPRSS;GIP;Mem;Met;Or;SP
Plekhb2	8.93137	10.0368	10.4826	10.9449	10.919	11.4059	1.34692e-07	U	Positive	P60	Unclassified	Mem
Tspan6	9.93756	9.59093	7.66874	6.61997	6.16945	5.46464	1.34748e-07	C1;J;T	Negative	P1;P12;P60	Unclassified	Bi;EPRSS;IS;Mem;Or
Cdh16	7.60079	7.02781	0.528321	2.17972	2.34813	0	1.34855e-07	C1	Negative	P60	CMP	ACAM;Bi;Mem
Slc39a10	11.8356	11.8011	10.5672	9.9448	9.60259	9.24065	1.35091e-07	C1;T	Negative	P12;P60	ITH	CCDB;LT;Mem
Shcbp1	10.094	9.41766	7.56499	7.56646	7.11838	5.84155	1.35143e-07	C1	Negative	P60	PTSKA	Bi;CPGD;EPRSS
Cdhr2	4.90011	8.98578	8.99058	8.84687	8.0027	5.6337	1.35413e-07	B;E	Positive	E15.5_Ngn3_Het;P1	Unclassified	ACAM;Bi;BRB;Mem
Ccdc8	11.794	11.8061	10.9226	10.4678	9.2213	4.67076	1.35624e-07	B1;C1	Negative	P60	Unclassified	BRB;CCDB;Mem
Heatr1	11.246	10.6191	9.59512	9.26565	9.44074	9.10858	1.35781e-07	C1;J	Negative	P1;P60	Unclassified	Bi;CCDB;GIP;Mem
Hpn	10.9241	10.1967	9.36585	9.35453	8.70291	7.02183	1.36097e-07	C1	Negative	P60	ITH	ACAM;BRB;BCA;CPGD;CCDB;DPR;Di;EPRSS;GIP;LT;Mem;Met;Or;SP
Adora3	0.33	4.78	6.29	6.86	7.33	7.33	1.36305e-07	A;D	Positive	E15.5_Ngn3_Het;P1	GGA;ITH;VTSC	Bi;BRB;EPRSS;IS;LT;Mem;Or
Tjp3	10.4092	9.53325	7.90255	8.24898	8.10306	7.69735	1.36329e-07	C1;J	Negative	P1;P60	Unclassified	ACAM;Bi;CPGD;GIP;Mem
Gm13115	0	2.40961	6.07426	7.65303	7.76687	7.12268	1.37347e-07	K	Positive	P4
Tnfrsf9	2.46411	4.30079	7.62617	7.71352	7.90683	7.94799	1.37623e-07	D;U	Positive	P1;P60	VTSC	Bi;BRB;CCDB;EPRSS;LT;Mem
Ppp2r2c	0.861654	4.09974	7.09953	7.05057	7.78931	6.21454	1.38029e-07	D;O	Positive	P1;P12	Unclassified	ACAM;Bi;BRB;BCA;CCDB;EPRSS
Pmaip1	7.86014	8.5571	1.9183	2.3023	2.54795	0.666667	1.38043e-07	C1;J;T;Z	Negative	P1;P12;P60	OOMA	Bi;BRB;BCA;CPGD;CCDB;Di;EPRSS;GIP;IS;LT;Mem;Met
Adh5	11.9217	11.4472	10.4163	10.1511	10.2529	9.58803	1.38246e-07	C1;J;N;T	Negative	P1;P12;P4;P60	OOMA;OMPFAA	Bi;BCA;CCDB;DPR;Di;EPRSS;GIP;Met;Or
Gm15427	13.2931	12.4915	11.7186	11.4495	11.8401	11.2063	1.40409e-07	C1;N	Negative	P4;P60	Unclassified	GIP;Met
Fam162a	10.226	9.54321	7.2508	7.42422	7.62067	8.11616	1.40631e-07	C1;J;T	Negative	P1;P12;P60	OOMA	Bi;CPGD;CCDB;EPRSS;GIP;Mem;Or
Tmed5	11.0686	10.5155	9.01676	8.72287	8.82317	10.3572	1.40769e-07	I;S	Negative	P1;P12	Unclassified	CCDB;LT;Or
Nfe2l2	11.7689	11.4215	10.1198	10.0438	9.90353	9.6524	1.41692e-07	C1;J	Negative	P1;P60	OOMA	Bi;BRB;CPGD;CCDB;DPR;EPRSS;GIP;LT;Mem;Met
Wls	10.8766	11.1515	12.87	12.7317	12.4532	12.5051	1.42509e-07	D;K;U	Positive	P1;P4;P60	VTSC	DPR;EPRSS;Mem;Or
Acox1	10.09	11.34	11.77	11.8	11.48	11.37	1.4256e-07	A;D	Positive	E15.5_Ngn3_Het;P1	OOMA;OMPFAA	Bi;BRB;CCDB;DPR;Mem;Met;Or
Eif4a-ps4	14.2863	13.6828	12.6167	12.3809	12.3544	12.2107	1.42867e-07	C1	Negative	P60
Spred1	10.9192	10.6724	9.05136	9.07594	8.1091	8.50269	1.43355e-07	C1;J;T	Negative	P1;P12;P60	Unclassified	Bi;BCA;DPR;EPRSS;Mem;Met
Rgs7	0.53	5.02	6.29	6.86	7.03	7.82	1.43459e-07	A;D;U	Positive	E15.5_Ngn3_Het;P1;P60	GGA	Bi;BCA;CCDB;EPRSS;GIP;SP
Pvrl3	9.66276	10.668	11.2422	11.5272	11.461	11.1106	1.43702e-07	D;O	Positive	P1;P12	Unclassified	ACAM;Bi;DPR;Mem
Desi1	10.2482	10.7443	11.8269	11.8717	12.1568	12.1529	1.43913e-07	D;U	Positive	P1;P60	Unclassified	Bi;BCA;CCDB;GIP;Met
Ypel5	8.54531	10.1779	10.7768	10.4858	10.2623	10.6712	1.44631e-07	D	Positive	P1
Echs1	11.6458	11.1595	9.99853	9.84281	9.9328	9.56018	1.45262e-07	C1;J;T	Negative	P1;P12;P60	OMPFAA	Bi;BCA;CCDB;Met;Or
Scn3a	4.38	8.81	8.62	8.6	6.67	7.15	1.45687e-07	A	Positive	E15.5_Ngn3_Het	ITH;MPIC	ACAM;BRB;CCDB;EPRSS;LT;Mem;SP
Pla2g12a	11.0761	10.4215	9.43285	9.24438	8.74059	9.28588	1.47424e-07	C1;J;T	Negative	P1;P12;P60	OMPFAA	BCA;LT;Met;Or
Smarcd3	9.18046	8.23499	5.12646	5.28969	5.6686	6.02351	1.4791e-07	C1;J;T	Negative	P1;P12;P60	Unclassified	Bi;BRB;CPGD;CCDB;DPR;GIP;Met;Or;SP
Txn1	11.9465	11.3727	10.5172	10.2863	10.1686	9.77456	1.48202e-07	C1;J;T	Negative	P1;P12;P60	OOMA	Bi;BRB;BCA;CPGD;CCDB;EPRSS;GIP;IS;LT;Met;Or
Nebl	3.62345	6.01292	7.78209	7.49954	8.2442	9.50227	1.48243e-07	D;U	Positive	P1;P60	Unclassified	Bi;CCDB;DPR
Cdc7	10.3172	9.60205	7.77068	8.25565	7.69512	6.84141	1.4832e-07	C1	Negative	P60	PTSKA	Bi;BCA;CPGD;CCDB;GIP;Met
Amot	9.82179	9.31339	6.7757	7.06153	6.91871	3.91326	1.48384e-07	C1	Negative	P60	GGA;VTSC	ACAM;Bi;BRB;BCA;CCDB;DPR;EPRSS;GIP;LT;Mem;Or;SP
Fam20c	10.1763	11.3394	11.4157	11.7729	11.786	12.1496	1.48556e-07	D;U	Positive	P1;P60	PTSKA	Bi;BCA;CCDB;DPR;Met;Or
C3ar1	7.47811	8.70638	1.38998	1.05664	1.10731	0.333333	1.48947e-07	C1;J;Z	Negative	P1;P60	GGA;ITH	ACAM;Bi;BRB;DPR;Di;EPRSS;IS;Mem
Fam171a2	9.71249	8.98268	6.89024	6.94817	6.64292	3.6416	1.48948e-07	C1	Negative	P60	Unclassified	Mem
Ptpn3	10.8566	10.5326	8.89389	8.91459	8.56438	7.85085	1.49361e-07	C1	Negative	P60	Unclassified	Bi;BCA;CPGD;CCDB;DPR;Mem;Met
Btrc	9.68311	10.8638	11.59	11.2489	11.3587	10.897	1.50541e-07	D;K	Positive	P1;P4	Unclassified	Bi;BRB;BCA;CPGD;CCDB;DPR;EPRSS;GIP;IS;Met
Phf21b	7.81249	9.32617	10.4643	10.4499	10.0969	9.5726	1.50831e-07	D	Positive	P1	Unclassified	Bi
H2-K1	9.65978	9.9819	10.3002	12.2601	12.1011	11.1825	1.51365e-07	D;K	Positive	P1;P4	Unclassified	IS;Mem
Slc16a12	10.604	11.0931	12.5951	12.4196	12.1274	11.8986	1.51473e-07	D	Positive	P1	MPIC	LT;Mem
Wdr46	10.7607	9.98423	8.8637	8.59243	8.73282	8.60617	1.51796e-07	C1	Negative	P60	Unclassified	Bi;GIP
Ccl9	7.45172	7.90271	0	0	1.10731	0.861654	1.52947e-07	C1;J;Z	Negative	P1;P60	GGA;PTSKA	ACAM;Bi;CCDB;EPRSS;IS
Ppan	10.8717	10.0459	8.7654	9.02898	9.20449	8.39297	1.53664e-07	C1	Negative	P60	Unclassified	CPGD;EPRSS;GIP
Pus1	10.5766	9.67259	8.56054	8.3816	8.41613	8.28331	1.53873e-07	C1;J	Negative	P1;P60	Unclassified	Bi;BCA;CCDB;GIP
Slc6a6	11.8604	12.4002	13.7969	13.7637	13.7481	12.8533	1.53874e-07	D	Positive	P1	MPIC	LT;Mem
Cuzd1	4.56493	1.87157	3.84053	9.47049	11.6045	4.80163	1.54072e-07	Predicted_contaminant
Slc35e4	4.77209	5.85902	8.5707	8.90111	8.9347	9.47673	1.5408e-07	D;U	Positive	P1;P60	Unclassified	LT;Mem
Syngr2	12.0344	11.2182	10.2204	10.549	10.5394	10.3276	1.5448e-07	C1;J	Negative	P1;P60	Unclassified	ACAM;LT;Mem;Or
Nup107	10.9507	10.3712	9.15515	9.16859	8.80556	8.35252	1.54856e-07	C1;N	Negative	P4;P60	GGPMTC	Bi;BRB;CPGD;CCDB;GIP;LT;Mem;Met
Pold2	10.9516	9.89774	8.73547	9.27327	9.47421	8.90638	1.55412e-07	C1;J	Negative	P1;P60	Unclassified	BCA;CPGD;GIP;Met;Or
Hdac6	10.44	12.03	12.05	11.93	12.19	10.49	1.55914e-07	A;B;D	Positive	E15.5_Ngn3_Het;P1	Unclassified	Bi;CCDB;LT;Met
Nusap1	10.6955	10.1795	8.76048	8.57671	8.59566	7.25151	1.56987e-07	C1	Negative	P60	Unclassified	Bi;CPGD;CCDB;GIP;LT
Gm10052	11.8162	11.5132	10.4546	9.90245	9.94622	9.55345	1.57225e-07	C1	Negative	P60
Dos	9.16655	10.404	11.1727	11.2351	10.5199	10.818	1.57401e-07	K	Positive	P4
Ctps	11.1843	10.5687	9.44332	9.41705	9.27529	9.02346	1.58119e-07	C1;J;N	Negative	P1;P4;P60	OMPFAA	Bi;BCA;Mem;Met
Cdca5	9.93208	9.0646	6.99801	7.50784	7.12442	5.76557	1.58223e-07	C1;T	Negative	P12;P60	Unclassified	Bi;CPGD;CCDB;Di;GIP;LT;Mem
Fam19a1	1	4.52075	6.77553	7.53433	7.16822	6.63782	1.583e-07	D	Positive	P1	Unclassified	CCDB
Myl12a	11.8521	11.6858	10.2319	9.90798	9.9444	10.0383	1.59742e-07	C1;J;N;T	Negative	P1;P12;P4;P60	Unclassified	ACAM;Bi;BRB;CCDB;DPR;IS;LT;Mem;Or;SP
Sypl	12.3319	11.924	10.7478	10.7077	10.6902	9.98757	1.61406e-07	C1	Negative	P60	Unclassified	ACAM;LT;Mem;Or
1700023F06Rik	0	5.14834	6.23737	6.89065	6.93865	6.79811	1.61711e-07	D	Positive	P1	CMP	Bi
Mdfi	8.47571	8.33219	3.36425	4.64906	3.95909	0	1.61932e-07	C1	Negative	P60	PTSKA	BCA;CCDB;DPR;EPRSS;GIP
Trap1	11.6917	11.1687	9.86883	9.9511	10.0342	10.0072	1.61948e-07	C1;J	Negative	P1;P60	Unclassified	Bi;CPGD;CCDB;EPRSS;GIP;Mem;Met;Or
Rpl37	11.0072	10.5597	9.25712	8.7317	8.93019	9.16488	1.63354e-07	C1;N;T	Negative	P12;P4;P60	Unclassified	Bi;CCDB;GIP;Met
Utp20	11.424	10.9522	9.74331	9.52351	9.72368	9.28714	1.63519e-07	C1	Negative	P60	Unclassified	Bi;GIP
Nup205	12.2372	11.8109	10.5848	10.6385	10.6375	9.95487	1.65467e-07	C1;N	Negative	P4;P60	GGPMTC	Bi;BRB;CPGD;CCDB;GIP;LT;Mem;Met
Gm15163	10.5282	9.63341	8.13099	8.12383	8.6373	8.60625	1.66009e-07	N	Negative	P4
Fam57b	3.23808	5.70798	7.24947	8.04733	8.53164	7.45574	1.66093e-07	D;O	Positive	P1;P12	Unclassified	BCA;DPR;LT;Mem;Met;Or
Chrnb1	9.28074	8.58753	5.78843	5.84874	5.95821	3.71996	1.67158e-07	C1	Negative	P60	MPIC	ACAM;Bi;BRB;DPR;EPRSS;LT;Mem;SP
Fam46a	8.9891	10.1953	11.007	11.1555	10.3156	10.9493	1.67837e-07	K	Positive	P4
Antxr2	9.52365	9.48558	5.83725	6.40389	6.41652	1	1.67864e-07	C1	Negative	P60	Unclassified	Bi;EPRSS;Mem
Gm14303	12.7585	11.9093	11.1349	10.9159	11.2905	11.3934	1.69374e-07	N	Negative	P4
Gm13694	8.43863	9.6321	11.0057	10.8509	9.49783	10.9382	1.6939e-07	D	Positive	P1
Npr2	5.68	9.37	8.9	8.9	8.59	7.96	1.69521e-07	A	Positive	E15.5_Ngn3_Het	Unclassified	DPR;Mem;Met
Fam107a	2.16395	4.89718	8.90023	6.92963	6.38929	7.35046	1.69778e-07	D	Positive	P1	Unclassified	GIP
Fam81a	10.3973	9.26057	8.98382	8.62679	7.49703	6.21376	1.70322e-07	C1	Negative	P60
Eif5a	14.4276	13.6191	12.6094	12.5928	12.6383	12.6371	1.70604e-07	C1;J;N	Negative	P1;P4;P60	Unclassified	Bi;BCA;CPGD;CCDB;DPR;GIP;LT;Mem;Met;Or;SP
Bid	9.79396	9.26506	6.9281	6.76815	6.63591	5.26825	1.71956e-07	C1	Negative	P60	Unclassified	Bi;CPGD;CCDB;DPR;Di;EPRSS;IS;LT;Mem;Or
Rab9b	1.97	6.58	6.75	6.77	6.8	8.03	1.72019e-07	A;U	Positive	E15.5_Ngn3_Het;P60	GGA	Bi;BRB;BCA;GIP;LT;Mem
Pde4dip	10.5481	11.0282	11.9562	12.3175	12.1855	12.763	1.72614e-07	D;U	Positive	P1;P60	Unclassified	Bi;CCDB;GIP;Or
Mms22l	10.3061	9.68987	7.78338	8.13186	7.77716	6.79191	1.74008e-07	C1	Negative	P60	Unclassified	Bi;CCDB;GIP
Itm2c	11.02	11.85	12.48	12.44	12.48	13.52	1.74401e-07	A;U	Positive	E15.5_Ngn3_Het;P60	Unclassified	Bi;DPR;Mem;Or
Gm5540	8.57326	7.49778	3.91326	4.76468	5.58545	1.10731	1.7442e-07	C1	Negative	P60
Cttnbp2	7.60065	6.86838	9.25121	10.5848	10.6523	11.1847	1.75577e-07	U	Positive	P60	Unclassified	DPR
Galnt4	10.8916	10.1902	9.03538	9.40664	8.86138	7.59173	1.76046e-07	C1	Negative	P60	Unclassified	Bi;BCA;Mem;Met;Or
Dpy19l1	10.2871	9.74112	7.55291	7.88863	7.65912	7.58041	1.76131e-07	C1	Negative	P60	Unclassified	BCA;Mem;Met
Megf9	9.12067	10.1156	10.5496	11.0316	10.8906	11.8191	1.76751e-07	U	Positive	P60	Unclassified	Bi;Mem
Clcnkb	7.18182	6.43392	0.333333	0.666667	0	0	1.77191e-07	C1;J	Negative	P1;P60	ITH;MPIC	Bi;LT;Mem
Mphosph10	10.8712	10.1896	9.02808	8.75924	8.87038	8.98939	1.77497e-07	C1;J	Negative	P1;P60	Unclassified	Bi;BCA;GIP;Met
Oprd1	7.12997	5.36019	1.86165	1.10731	1.10731	0	1.77622e-07	C1;J	Negative	P1;P60	GGA	ACAM;Bi;BRB;EPRSS;LT;Mem;SP
Cdkn2aipnl	10.8886	10.361	8.79882	8.97872	8.87636	8.77327	1.78406e-07	J	Negative	P1
Cacnb3	8.12493	9.40715	10.2454	10.4737	10.4733	10.3842	1.78662e-07	D	Positive	P1	IPS;ITH;MPIC	ACAM;Bi;DPR;Di;IS;LT;Mem;Met;SP
Gpd2	10.1179	11.6204	11.731	11.6472	11.7295	10.6436	1.78879e-07	B;D;E;O;U	Positive	E15.5_Ngn3_Het;P1;P12;P60	OOMA	Bi;BCA;CCDB;DPR;Mem;Met;Or
Wdr89	12.611	12.1117	11.3323	10.82	10.7383	10.698	1.78884e-07	C1	Negative	P60	Unclassified	Bi
Cln6	10.211	10.7678	12.4813	11.7904	11.6487	11.4586	1.78982e-07	D	Positive	P1	ITH	BRB;Met;Or
Rbl1	10.8064	10.2836	8.60416	9.04835	8.84531	7.93966	1.79036e-07	C1	Negative	P60	PTSKA	BCA;CPGD;Di;EPRSS;GIP;Met
Gnptg	8.82214	10.3906	10.7788	10.4863	10.4359	11.1585	1.79144e-07	D;U	Positive	P1;P60	Unclassified	Bi;BCA;LT;Met;Or
Siva1	10.16	9.25639	7.52039	7.74035	7.67328	7.30277	1.79158e-07	C1;J	Negative	P1;P60	Unclassified	Bi;CPGD;EPRSS;GIP
Snrpa1	10.8686	10.446	9.05779	8.83795	8.68891	8.3156	1.80357e-07	C1	Negative	P60	Unclassified	Bi;GIP
Pomt2	10.0446	11.1578	11.845	11.7207	11.6462	10.7771	1.80568e-07	D	Positive	P1	Unclassified	Bi;BCA;Mem;Met;Or
Dnajc2	10.9742	10.673	9.22762	8.88378	8.63146	8.87562	1.80717e-07	C1;J;N;T	Negative	P1;P12;P4;P60	Unclassified	Bi;BCA;CPGD;CCDB;GIP;Mem
Slc19a1	10.2136	9.17372	7.98377	7.78971	7.80973	7.28986	1.81741e-07	C1;N	Negative	P4;P60	ITH;OMPFAA	Bi;Di;EPRSS;LT;Mem;Met
Oxtr	1.19499	6.49952	7.37551	5.55852	5.89233	8.36083	1.82224e-07	U	Positive	P60	Unclassified	ACAM;Bi;BRB;EPRSS;Met
Stoml2	11.0413	10.5048	9.11543	9.1578	9.11107	9.08136	1.83194e-07	C1;J;N	Negative	P1;P4;P60	ITH	Bi;BRB;CCDB;EPRSS;GIP;IS;LT;Mem;Met;Or
Pde7b	4.47341	4.99912	7.86004	8.48616	9.38877	9.90807	1.8353e-07	O;U	Positive	P12;P60	GGA	Bi;BCA;EPRSS;Met
Gns	11.2385	12.018	12.87	12.7772	12.7635	13.1357	1.83575e-07	D;U	Positive	P1;P60	VTSC	Bi;BCA;LT;Met;Or
Gm13443	11.2309	10.8755	9.46977	9.01774	9.30581	9.70217	1.86636e-07	N	Negative	P4
Gm11814	7.61514	6.55388	1.44064	2.63563	3.4084	0	1.86908e-07	C1	Negative	P60
Pacsin1	5.65	8.22	8.86	8.79	9.18	9.09	1.87182e-07	A;D;U	Positive	E15.5_Ngn3_Het;P1;P60	VTSC	ACAM;Bi;CCDB;DPR;EPRSS;LT;Mem;Or;SP
Gm26559	1.05664	5.52871	6.81794	6.74725	7.06007	6.61146	1.87909e-07	D	Positive	P1
Nt5c3	9.85677	9.95926	11.5224	11.6026	11.7672	12.1295	1.88036e-07	D;O;U	Positive	P1;P12;P60	Unclassified	Bi;BCA;CCDB;Met
Osbpl5	8.48231	9.42889	10.1438	10.9078	11.2031	9.63454	1.89079e-07	O	Positive	P12
Hmgn5	10.5283	10.0988	8.1919	8.17084	8.13767	8.18571	1.8919e-07	C1;J	Negative	P1;P60	Unclassified	GIP
Tal1	7.82254	6.1427	3.69227	4.08244	2.57142	0.333333	1.89909e-07	C1	Negative	P60	Unclassified	Bi;BCA;CPGD;CCDB;DPR;GIP;IS
Tspan12	9.83271	9.72388	6.78781	6.82774	6.87759	3.52329	1.90222e-07	C1	Negative	P60	Unclassified	DPR;EPRSS;Mem
Hbb-bt	10.1255	9.22069	8.11139	8.20022	7.54359	3.91494	1.90631e-07	C1	Negative	P60	OOMA;VTSC	Bi;CCDB;Di;LT;Met
Sgol1	9.94815	9.18125	7.47049	7.3422	7.06271	5.66372	1.91117e-07	C1	Negative	P60	Unclassified	Bi;CPGD;CCDB;GIP
Pcdha2	4.57199	6.82703	8.23287	7.63487	8.48977	10.3879	1.91621e-07	U	Positive	P60	Unclassified	ACAM;Bi;Mem
Ccdc64	6.91	8.94	9.55	9.76	9.68	9.82	1.92193e-07	A;D	Positive	E15.5_Ngn3_Het;P1	GGA	Bi;CCDB;DPR;LT
Gpr126	11.022	11.1871	10.5834	7.93167	7.87461	7.61779	1.92197e-07	Singleton	Negative	P4
Trim28	13.9561	13.5378	12.3097	12.2861	12.1238	11.4922	1.92219e-07	C1;J	Negative	P1;P60	Unclassified	Bi;BRB;BCA;CCDB;DPR;EPRSS;GIP;IS;LT;Met
Syt16	1.44064	6.83665	7.58224	7.0782	6.5755	2.60245	1.92444e-07	B;E	Positive	E15.5_Ngn3_Het;P1	Unclassified	Bi;LT;Mem
Bcl2l2	9.85881	10.6648	11.5147	11.6541	11.2826	11.784	1.9283e-07	D;U	Positive	P1;P60	Unclassified	Bi;CPGD;CCDB;DPR;EPRSS;Mem;Or
Slc6a19	0.935785	5.81086	7.09266	6.44126	6.14446	7.57346	1.93503e-07	D;U	Positive	P1;P60	ITH	Bi;EPRSS;LT;Mem;Or
Gm7353	8.26716	8.53946	10.2648	10.5338	10.7207	11.3688	1.9361e-07	U	Positive	P60	Unclassified	Bi
Maf	8.56223	10.0797	3.91326	4.73476	5.26965	1.19499	1.95134e-07	C1	Negative	P60	Unclassified	BRB;BCA;DPR;GIP
D19Bwg1357e	11.2551	10.774	9.62688	9.35778	9.44903	9.0691	1.95546e-07	C1	Negative	P60	Unclassified	GIP;Or
Tuba4a	12.488	12.1282	10.9082	10.8686	10.5653	10.7976	1.9729e-07	C1;J;N;T	Negative	P1;P12;P4;P60	CMP;GGA;VTSC	ACAM;Bi;BRB;BCA;CPGD;CCDB;IS;Met;Or
Rnf14	10.0014	10.8482	11.6459	11.5764	11.5212	11.907	1.9754e-07	D;U	Positive	P1;P60	Unclassified	Bi;BCA;CCDB;EPRSS;GIP
Mia3	11.8498	12.2499	13.5717	13.6346	13.5653	13.8249	1.97809e-07	D;K;U	Positive	P1;P4;P60	VTSC	ACAM;Bi;BRB;CCDB;DPR;EPRSS;IS;LT;Mem;SP
Marcks	12.5575	13.129	11.3988	11.1598	10.6418	9.0874	1.98003e-07	C1	Negative	P60	Unclassified	Bi;CCDB;Di;Mem;Met;Or
Gm46	6.8435	4.9498	0	0	0	0	1.99036e-07	C1;J	Negative	P1;P60	Unclassified	BCA;CCDB
Clic5	4.31515	5.64327	8.90341	8.82324	8.08975	8.2194	1.99167e-07	D;K	Positive	P1;P4	ITH;MPIC	Bi;BRB;CCDB;DPR;EPRSS;LT;Mem;Or
Ildr1	9.20467	10.3517	11.0538	11.1592	10.8114	10.7422	1.99727e-07	D	Positive	P1	VTSC	LT;Mem
Tbl3	11.1177	10.3728	9.20445	9.38143	9.40439	9.31887	1.99799e-07	C1;J	Negative	P1;P60	Unclassified	Bi;GIP
Rufy3	8.03121	9.35504	10.4584	10.2222	10.1816	10.554	2.00002e-07	D	Positive	P1	Unclassified	Bi;CCDB;DPR;SP
Ak4	8.28408	7.29714	4.28606	4.17956	4.07697	1.19499	2.00093e-07	C1	Negative	P60	Unclassified	Bi;BCA;CCDB;DPR;EPRSS;Met;Or
Brca2	10.6528	10.0833	9.12336	8.58827	8.35114	6.72658	2.00239e-07	C1;T	Negative	P12;P60	VTSC	Bi;BRB;BCA;CPGD;CCDB;DPR;Di;EPRSS;GIP;Or
Sox4	11.0935	11.6926	9.68257	8.95139	9.15261	7.45021	2.00452e-07	C1	Negative	P60	IPS	ACAM;BRB;CPGD;CCDB;DPR;EPRSS;GIP;LT;Met;Or
Prmt5	11.3194	10.9008	9.6915	9.50709	9.46268	9.10317	2.00469e-07	C1;J;N	Negative	P1;P4;P60	Unclassified	Bi;BCA;CCDB;GIP;Met
Cct6a	12.5975	12.3746	11.1315	10.85	10.6998	10.6163	2.01543e-07	C1;J;N	Negative	P1;P4;P60	Unclassified	Bi;CCDB;DPR;GIP;Met;Or
Gprc6a	0	5.42808	7.293	6.23519	6.40303	5.96139	2.02289e-07	D	Positive	P1	CMP;GGA;PTSKA	Bi;EPRSS;Mem
Cdh6	8.95171	9.07001	4.74594	5.32439	5.19143	0.528321	2.02809e-07	C1	Negative	P60	CMP	ACAM;Bi;CCDB;GIP;Mem;Or
Sult4a1	2.65909	6.56146	8.16714	7.105	6.48949	7.1668	2.02925e-07	D	Positive	P1	Unclassified	BCA;Met
Zak	10.1592	9.51792	7.94199	7.4791	7.2486	7.13219	2.02948e-07	C1;J;T	Negative	P1;P12;P60	PTSKA	ACAM;Bi;BRB;BCA;CPGD;CCDB;EPRSS;GIP;Met
Trpc7	0.528321	3.71573	7.51518	7.42189	6.96225	4.86016	2.02991e-07	D	Positive	P1	GGA;ITH;MPIC	Bi;BRB;BCA;CCDB;EPRSS;GIP;IS;LT;Mem
Hivep3	7.28924	8.45219	9.85989	9.96694	10.3013	9.95661	2.04005e-07	D;O;U	Positive	P1;P12;P60	Unclassified	Bi;BCA;CCDB;DPR;GIP;Met
Phf1	7.82627	9.27878	9.851	10.206	10.3511	10.581	2.04069e-07	D;U	Positive	P1;P60	Unclassified	Bi;BCA;CCDB;EPRSS;GIP;Met;Or
Anxa5	10.5116	11.0218	12.2901	12.0059	12.2461	12.1072	2.04211e-07	D;U	Positive	P1;P60	CMP	Bi;BRB;CCDB;EPRSS;Mem;Or
Rpl23	11.8465	11.6341	10.7912	9.817	9.62721	9.98072	2.04844e-07	C1;N;T	Negative	P12;P4;P60	Unclassified	Bi;CCDB;GIP;Met
Pdzrn4	1.19499	5.87675	7.78928	7.04165	6.4969	4.00746	2.07433e-07	D	Positive	P1	Unclassified	Bi;EPRSS
AI607873	7.69254	8.76199	1	2.63563	2.69227	1.38998	2.07563e-07	J	Negative	P1
Prkci	11.511	11.0745	9.85157	9.64627	9.88005	9.51672	2.07621e-07	C1;J;N	Negative	P1;P4;P60	IPS;PTSKA;VTSC	ACAM;Bi;BCA;CPGD;CCDB;DPR;EPRSS;GIP;LT;Mem;Met;Or
Gpc2	9.39169	10.3324	6.50975	6.46721	5.50242	2.44662	2.07691e-07	C1	Negative	P60	Unclassified	Bi;CCDB;DPR;Di;EPRSS;Mem;Met;Or
Fgd2	8.42	10.23	10.47	10.4	10.43	9.96	2.07869e-07	A;D;O	Positive	E15.5_Ngn3_Het;P1;P12	GGA;PTSKA	Bi;BCA;CPGD;EPRSS;GIP;Mem
Nln	10.4789	9.77658	8.59911	8.17267	8.20733	7.58724	2.1113e-07	C1;J;T	Negative	P1;P12;P60	Unclassified	Bi;BCA;Mem
Cnih2	4.35559	8.87645	8.98171	8.23396	6.76293	5.58682	2.12176e-07	B;E	Positive	E15.5_Ngn3_Het;P1	Unclassified	BRB;CCDB;LT
Tmem30a	11.2874	12.3085	12.914	12.7923	12.5997	13.0546	2.12292e-07	D;U	Positive	P1;P60	ITH	Bi;CCDB;DPR;EPRSS;LT;Mem;Or
Kif18b	10.0051	9.12741	7.68175	7.73381	7.44926	4.90796	2.12298e-07	C1	Negative	P60	Unclassified	ACAM;Bi;BCA;CPGD;CCDB;GIP;Mem;Met
Rps24-ps3	12.135	11.472	10.6759	10.2606	10.528	10.7785	2.13617e-07	N	Negative	P4
Nup160	11.3826	10.8757	9.75365	9.72008	9.61297	9.13909	2.14427e-07	C1;N	Negative	P4;P60	GGPMTC	Bi;BRB;CPGD;GIP;LT;Met
Clcnka	7.03811	6.13453	0	0	0	0	2.14867e-07	C1;J	Negative	P1;P60	ITH;MPIC	Bi;BRB;DPR;LT;Mem
Ccr1	7.3033	8.34175	0.666667	0.333333	1.19499	0	2.15879e-07	C1;J;Z	Negative	P1;P60	GGA	Bi;DPR;EPRSS;IS;Mem;SP
Gm10073	12.0358	11.1715	10.3625	10.253	10.7639	10.6537	2.15915e-07	J;T	Negative	P1;P12	Unclassified	BCA;CCDB;GIP
Eif2s1	11.7683	11.4231	10.2342	10.0023	9.9095	9.98951	2.17029e-07	C1;J;N	Negative	P1;P4;P60	Unclassified	Bi;CCDB;Di;GIP;LT;Mem;Met;Or
BC022687	6.00639	8.31775	9.01735	9.51002	8.77338	9.49231	2.17136e-07	K	Positive	P4
Gm15772	13.0906	12.4269	11.6804	11.2292	11.4132	11.4823	2.17538e-07	N	Negative	P4
Mast4	9.79787	10.8577	11.3205	11.6582	11.4341	10.9221	2.1871e-07	D	Positive	P1	PTSKA	Bi;BCA;Met
Gm6368	10.7116	10.0684	9.24708	8.28169	8.24947	8.85764	2.21257e-07	T	Negative	P12
Adamts10	9.97194	9.38357	7.22871	7.29219	8.00787	3.63161	2.21338e-07	C1	Negative	P60	Unclassified	Bi;BCA;CCDB;Met
Lrtm2	1.72331	6.90478	8.12625	7.28256	6.13245	1.33333	2.21818e-07	B	Positive	E15.5_Ngn3_Het	Unclassified	Bi;Mem
Rps3	14.7451	14.2857	13.1591	12.6757	12.8571	12.4909	2.22185e-07	C1;J;N;T	Negative	P1;P12;P4;P60	Unclassified	Bi;CPGD;CCDB;EPRSS;GIP;LT;Mem;Met;Or;SP
Rap2c	10.7077	10.2802	8.73802	8.51998	8.48311	8.46268	2.22441e-07	C1;J;N	Negative	P1;P4;P60	GGA	ACAM;Bi;BCA;CCDB;EPRSS;GIP;LT;Mem;Met;Or
Gpr27	1.33333	4.5072	6.30041	7.24921	7.63151	7.13602	2.22578e-07	D;U	Positive	P1;P60	GGA	EPRSS;Mem
Nup133	11.0751	10.5342	9.35187	9.31705	9.24347	8.61779	2.22894e-07	C1;J;N	Negative	P1;P4;P60	GGPMTC	Bi;BRB;CPGD;CCDB;DPR;GIP;LT;Met
Gm4419	5.35176	7.03351	8.76301	9.1472	8.93821	9.1234	2.23035e-07	D	Positive	P1
Cited1	8.15047	8.17858	4.19295	3.20979	2.49728	0.666667	2.23776e-07	C1;T	Negative	P12;P60	PTSKA	Bi;BCA;CPGD;CCDB;DPR;EPRSS;GIP;IS;LT
Ctsz	11.3517	11.6226	9.92179	9.20852	9.3081	8.98878	2.24977e-07	C1;N	Negative	P4;P60	VTSC	DPR;LT;Met
Celsr1	11.6412	11.426	9.91693	10.4157	9.84588	8.29263	2.24982e-07	C1	Negative	P60	CMP;GGA	ACAM;Bi;CCDB;DPR;EPRSS;GIP;LT;Mem
Eef2k	10.8946	9.94488	8.86851	9.11782	9.30894	9.04778	2.2558e-07	J;N	Negative	P1;P4	CMP;PTSKA	Bi;BCA;GIP;Met
Svopl	0.666667	2.64555	8.39609	7.32221	6.41054	5.3079	2.25648e-07	D	Positive	P1	Unclassified	LT;Mem
Snx5	13.0006	12.6892	11.4919	11.1684	11.0355	11.5333	2.27244e-07	J;T	Negative	P1;P12	VTSC	Bi;LT;Mem
Aaas	10.3704	9.65442	8.04441	8.08609	7.9724	8.11213	2.28107e-07	C1;J;N	Negative	P1;P4;P60	GGPMTC	Bi;BRB;CPGD;CCDB;DPR;GIP;LT;Mem;Met;SP
Gm15496	0	5.72	6.76	6.39	6.09	6.64	2.28218e-07	A	Positive	E15.5_Ngn3_Het
Abcb6	10.6199	9.76983	8.82898	8.50295	8.56056	8.37291	2.2879e-07	C1;J;T	Negative	P1;P12;P60	Unclassified	Bi;BCA;DPR;LT;Mem;Met;Or
Spats2	10.373	10.1471	8.29916	7.66282	7.24309	7.90247	2.29089e-07	C1;N;T	Negative	P12;P4;P60	Unclassified	Bi;CCDB;GIP
Tspan4	9.46937	8.74956	6.03324	6.53186	6.37981	4.94967	2.30132e-07	C1	Negative	P60	Unclassified	ACAM;CCDB;Mem;Or
BC049730	2.18995	4.16686	8.07751	8.51851	6.60898	5.63825	2.31047e-07	K	Positive	P4
Kel	7.0017	4.52926	0.935785	2.8629	1.05664	0	2.32423e-07	C1;T	Negative	P12;P60	Unclassified	Bi;BCA;Met
2810459M11Rik	7.4604	6.15417	1	2.65909	3.40274	0	2.33559e-07	C1	Negative	P60	Unclassified	Bi
Tat	0.528321	4.75371	6.55148	6.80029	6.52987	7.59956	2.34221e-07	D;U	Positive	P1;P60	OMPFAA	Bi;BCA;CCDB;EPRSS;Met
Nova2	4.823	7.8355	8.53519	8.61442	8.33024	7.63215	2.35262e-07	D	Positive	P1	Unclassified	GIP;Met
Wdr77	11.8474	11.3595	10.4007	10.1419	10.2334	9.744	2.3557e-07	C1;N;T	Negative	P12;P4;P60	Unclassified	Bi;BRB;BCA;CPGD;CCDB;DPR;GIP;Met;Or
Qprt	7.31718	6.07659	1.19499	1.52832	3.00746	0	2.36365e-07	C1	Negative	P60	OMPFAA	Bi;BCA;CCDB;Di;Met
Stc2	9.84126	9.19013	7.92328	7.19069	7.01683	2.40961	2.377e-07	B1;C1	Negative	P60	OOMA	Bi;BRB;CPGD;CCDB;DPR;EPRSS;Or
Bcmo1	4.55303	7.8931	8.26748	8.17342	7.56352	8.97144	2.38363e-07	D;U	Positive	P1;P60	Unclassified	Bi;BRB;Met
Trip10	9.46458	8.78835	6.01861	6.23908	6.27017	5.79535	2.3882e-07	C1;J	Negative	P1;P60	IPS;VTSC	Bi;CCDB;EPRSS;GIP;LT;Mem;Or
Kcnj6	0	4.06533	6.87952	6.5707	7.14677	6.14348	2.38953e-07	D	Positive	P1	GGA;ITH;MPIC	ACAM;Bi;EPRSS;LT;Mem;Or;SP
Fcgr3	7.48794	8.73026	0	1.96896	2.59379	1.3023	2.40566e-07	C1;J	Negative	P1;P60	VTSC	ACAM;Bi;BCA;CCDB;DPR;Di;EPRSS;IS;LT;Or
Pcx	10.3986	9.85251	12.0661	12.0363	12.2947	12.2243	2.40593e-07	O;U	Positive	P12;P60	Unclassified	Mem;Met
Gm1821	12.4932	13.1007	14.2144	14.2938	14.0317	14.785	2.4098e-07	U	Positive	P60
Fcrls	7.03745	9.05981	0.333333	0.333333	0.861654	0	2.42879e-07	J	Negative	P1	VTSC	BRB;EPRSS;LT
Col4a6	8.72754	8.46034	3.65043	5.03158	5.79731	0.666667	2.44369e-07	C1	Negative	P60	IPS	ACAM;CCDB;Di;EPRSS;Mem;SP
Farsb	11.5635	11.1131	9.82556	9.75402	9.79602	10.2056	2.44377e-07	C1;J;S;T	Negative	P1;P12;P60	OMPFAA	Bi;BCA;CCDB;GIP;Mem
Rpl13	11.1366	10.6766	9.4215	9.11276	9.16148	9.63303	2.45432e-07	C1;J;N	Negative	P1;P4;P60	Unclassified	CCDB;GIP;Met
Tap2	6.93244	7.44441	9.54754	9.52901	10.2357	10.8539	2.45923e-07	D;K;O;U	Positive	P1;P12;P4;P60	Unclassified	Bi;Di;EPRSS;IS;LT;Mem;Or
Nedd9	10.3834	9.32699	7.91332	8.08881	8.67307	8.29537	2.47173e-07	J	Negative	P1	Unclassified	Bi;BRB;CCDB;GIP;Or
Ang	10.1847	9.08365	8.15908	7.23618	7.88038	8.29101	2.47491e-07	C1;T	Negative	P12;P60	OOMA	BCA;EPRSS
Anp32a	12.5174	12.3693	10.9219	10.9132	10.7953	10.2408	2.47549e-07	C1;N	Negative	P4;P60	Unclassified	Bi;CCDB;GIP;Met;Or
Pim3	11.5093	10.7612	10.119	9.89103	9.77466	9.61196	2.47564e-07	C1;J;N;T	Negative	P1;P12;P4;P60	IPS;PTSKA	ACAM;Bi;BCA;CCDB;EPRSS;GIP;LT;Mem;Met
Rcl1	10.4199	9.47496	8.19038	8.20925	8.44922	8.24598	2.4859e-07	C1;J	Negative	P1;P60	Unclassified	BCA;GIP
Slbp	11.1453	10.8002	9.3534	9.46856	9.07121	9.05031	2.49521e-07	C1;J;T	Negative	P1;P12;P60	Unclassified	Bi;BCA;CPGD;GIP;LT
Kcnu1	2.83062	5.45455	7.57659	7.52146	7.61687	7.49152	2.4966e-07	D	Positive	P1	IPS;ITH;MPIC	LT;SP
Ccbl2	9.75829	8.82755	6.97599	6.55184	7.17791	6.66816	2.50453e-07	C1;J;N	Negative	P1;P4;P60	OMPFAA	Bi;BCA;CCDB;Di;GIP;Met
Ptgr1	9.25662	8.57637	5.39175	6.02352	6.4031	4.25288	2.51866e-07	C1	Negative	P60	OOMA;OMPFAA	Bi;BCA;CCDB;EPRSS;Met;Or
Naf1	10.0811	9.46333	7.58513	7.26108	7.38873	7.36159	2.51881e-07	C1;J	Negative	P1;P60	Unclassified	ACAM;Bi;CCDB;GIP
Ccne1	9.83852	8.84854	6.92513	7.76811	6.78618	6.38358	2.52147e-07	C1;J;T	Negative	P1;P12;P60	Unclassified	Bi;BRB;BCA;CPGD;CCDB;Di;EPRSS;GIP;Met
Vps13c	10.2766	10.9456	12.2944	11.6179	11.7337	11.8499	2.52769e-07	D	Positive	P1
Rogdi	9.53	10.81	11.25	11.1	11.01	11.1	2.5427e-07	A;D	Positive	E15.5_Ngn3_Het;P1	Unclassified	CPGD;DPR;GIP;LT;Mem
Lpin1	7.7773	8.95969	9.98406	10.0398	10.2617	10.8024	2.54902e-07	D;O;U	Positive	P1;P12;P60	IPS;OMPFAA	Bi;BCA;CCDB;DPR;EPRSS;GIP;Mem;Met;Or
Bend7	7.65811	9.45179	10.2075	9.93067	9.87615	10.0712	2.55051e-07	D	Positive	P1	Unclassified	Bi;Or
Efna4	8.14008	8.53568	3.12211	3.35894	3.9293	0	2.55175e-07	C1	Negative	P60	GGA;PTSKA	ACAM;Bi;DPR;EPRSS;Mem;SP
Gm13436	12.3962	11.6127	10.9662	10.8075	10.9296	10.5598	2.57199e-07	C1	Negative	P60
Dagla	9.07351	8.9097	11.1083	11.2493	11.338	10.2505	2.57797e-07	D;O	Positive	P1;P12	Unclassified	BCA;Met
Alyref	11.5018	10.9932	10.0219	9.99301	9.84859	8.78094	2.59191e-07	C1	Negative	P60	Unclassified	Bi;CCDB;Di;GIP;LT
Hnrnpd	12.712	12.4777	11.3807	11.0887	10.8959	10.2941	2.60142e-07	C1;J;N	Negative	P1;P4;P60	Unclassified	Bi;BRB;CCDB;GIP;Met;Or
Gm6136	12.2685	11.6673	10.8624	10.4984	10.6643	10.6913	2.61294e-07	N	Negative	P4
Dgke	8.31283	9.02168	10.8584	10.3625	10.0687	11.0951	2.61329e-07	D;U	Positive	P1;P60	GGA	Bi;BCA;EPRSS;IS;Met
Prps1	10.1449	10.931	11.9275	11.7552	11.5811	11.5405	2.62481e-07	D	Positive	P1	Unclassified	Bi;BCA;DPR;Met
Lgi2	10.6469	9.48193	10.3032	8.81138	6.73134	7.63229	2.63397e-07	T	Negative	P12
Hadh	11.9205	12.1551	13.7532	13.692	13.5074	14.0541	2.64238e-07	D;U	Positive	P1;P60	OOMA;OMPFAA;VTSC	Bi;BCA;CCDB;EPRSS;LT;Mem;Met;Or
Lsm4	11.0513	10.2708	9.3573	9.16031	9.54105	8.97104	2.65248e-07	C1;J;N	Negative	P1;P4;P60	Unclassified	Bi;GIP;Met;Or
Slc39a8	9.73229	8.94582	6.19193	6.2079	6.35616	9.04186	2.66111e-07	I;S	Negative	P1;P12	Unclassified	LT;Or
Rps14	13.6315	13.101	12.2054	11.8148	11.9157	11.6161	2.66484e-07	B1;C1;J;N	Negative	P1;P4;P60	Unclassified	BRB;CCDB;GIP;IS;Mem;Met;Or
Rab36	7.66	10.01	9.79	9.98	9.87	9.74	2.67208e-07	A	Positive	E15.5_Ngn3_Het	GGA	Bi;BCA;EPRSS;GIP;LT;Mem;Or
Igfbp2	8.3752	8.07937	3.56681	4.69227	4.34813	0	2.6818e-07	C1	Negative	P60	Unclassified	Bi;CPGD;CCDB;DPR;EPRSS;IS;Mem;Or
Iah1	10.0977	9.07403	7.60806	7.56615	7.91526	7.46327	2.69717e-07	J	Negative	P1	Unclassified	BCA;Or
Rps6ka1	10.1425	9.84142	7.17299	7.78111	7.89636	5.58347	2.69976e-07	C1	Negative	P60	GGA;PTSKA	ACAM;Bi;BRB;BCA;CPGD;CCDB;DPR;EPRSS;GIP;IS;Mem;Met;SP
Hspa9	13.814	13.3202	12.0387	11.9706	12.1462	12.2384	2.7034e-07	C1;J	Negative	P1;P60	Unclassified	Bi;BCA;CCDB;DPR;GIP;LT;Met;Or
[truncated: 2,683 more rows]
