# Supplementary material for: Temporal Transcriptome Analysis Reveals Dynamic Gene Expression Patterns Driving β-Cell Maturation
Source: Frontiers journal article supplement (doi:10.3389/fcell.2021.648791), 2021-05-04
Supplement: Table_2.XLS [file Table_2.XLS]

## Sheet: ESM_Table_1
Ensembl_ID	geneCoordinate	geneSymbol	E15.5_Ngn3_Het	P1	P4	P12	P60	P_value	Main_Pattern	Sign_Main_Pattern	Time_break	GSIS_process	Functional_Category	GeneSet_ID	GeneSet_Term
gene:ENSMUSG00000027220	chr2:92915097-92956058	Syt13	7.8322	9.16469	9.13869	8.94357	8.84128	0	A;D	Positive	E15.5_Ngn3_Het;P1	Vesicle-mediated transport and secretion by cell	Binding;Localization and transport;Membrane;Organelle	GO:0005515;GO:0005887;GO:0016192;GO:0030133;GO:0030659	cytoplasmic vesicle membrane;integral component of plasma membrane;protein binding;transport vesicle;vesicle-mediated transport
gene:ENSMUSG00000027419	chr2:143546155-143816285	Pcsk2	9.45365	11.6459	11.3059	11.45	11.6684	0	A;D;U	Positive	E15.5_Ngn3_Het;P1;P60	Insulin processing and signaling;Vesicle-mediated transport and secretion by cell	Binding;Biosynthesis and Catalytical activity;Cellular component organization or biogenesis;Developmental process and reproduction;Environmental information processing, response to stimulus and signaling;Metabolism;Organelle;System process	GO:0004175;GO:0005615;GO:0005788;GO:0006508;GO:0007399;GO:0030070;GO:0030133;GO:0030141;GO:0030425;GO:0032403;GO:0043204;REACT_115202;REACT_86675	dendrite;endopeptidase activity;endoplasmic reticulum lumen;extracellular space;insulin processing;nervous system development;perikaryon;protein complex binding;proteolysis;secretory granule;Signal Transduction;Signalling by NGF;transport vesicle
gene:ENSMUSG00000000215	chr7:142678655-142699510	Ins2	6.55188	11.6596	12.0646	12.0799	12.8659	0	D	Positive	P1	Glycolysis, Glucose processing, Pyruvate metabolism and TCA cycle;GTPase and G-protein activity;Insulin processing and signaling;Oxidation-reduction and Oxygen-mediated activity;Protein tyrosine and serine/threonine kinase activity;Vesicle-mediated transport and secretion by cell	Binding;Biological regulation and behavior;Biosynthesis and Catalytical activity;Cell cycle, proliferation, growth and death;Cellular component organization or biogenesis;Developmental process and reproduction;Disease;Environmental information processing, response to stimulus and signaling;Genetic Information process;Localization and transport;Metabolism;Organelle	GO:0000187;GO:0002020;GO:0005179;GO:0005615;GO:0005634;GO:0006006;GO:0006357;GO:0006984;GO:0007169;GO:0015758;GO:0016055;GO:0019216;GO:0030154;GO:0030529;GO:0032403;GO:0032869;GO:0034774;GO:0034976;GO:0045892;GO:0048646;GO:0097193;GO:1901575;path:mmu04014;path:mmu04066;path:mmu04114;path:mmu04140;path:mmu04150;path:mmu04151;path:mmu04810;path:mmu04910;path:mmu04911;path:mmu04914;path:mmu04917;pat…	activation of MAPK activity;Aldosterone-regulated sodium reabsorption - Mus musculus (mouse);anatomical structure formation involved in morphogenesis;cell differentiation;cellular response to insulin stimulus;ER-nucleus signaling pathway;extracellular space;glucose metabolic process;glucose transport;HIF-1 signaling pathway - Mus musculus (mouse);hormone activity;Insulin Processing;Insulin recept…
gene:ENSMUSG00000022315	chr15:52295552-52335798	Slc30a8	8.79891	13.2659	12.7181	12.5924	12.1717	0	D	Positive	P1	Glycolysis, Glucose processing, Pyruvate metabolism and TCA cycle;Insulin processing and signaling;Ion transport and homeostasis;Vesicle-mediated transport and secretion by cell	Binding;Biological regulation and behavior;Environmental information processing, response to stimulus and signaling;Immune system;Localization and transport;Membrane;Organelle	GO:0005886;GO:0006875;GO:0009749;GO:0016021;GO:0030001;GO:0030073;GO:0030141;GO:0030658;GO:0032024;GO:0032844;GO:0034097;GO:0042803;GO:0045087;GO:0046915;GO:0051235;GO:0072509;GO:0098660;REACT_81153;REACT_94160	cellular metal ion homeostasis;divalent inorganic cation transmembrane transporter activity;innate immune response;inorganic ion transmembrane transport;insulin secretion;integral component of membrane;maintenance of location;metal ion transport;plasma membrane;positive regulation of insulin secretion;protein homodimerization activity;regulation of homeostatic process;response to cytokine;respons…
gene:ENSMUSG00000020788	chr11:72961168-72993044	Atp2a3	4.53481	6.45934	6.25041	6.08531	6.4344	0	D	Positive	P1	Calcium-mediated processing;Ion transport and homeostasis;Membrane potential and Ion channels	Binding;Biological regulation and behavior;Disease;Environmental information processing, response to stimulus and signaling;Immune system;Localization and transport;Membrane;Metabolism	GO:0005388;GO:0005524;GO:0008152;GO:0016021;GO:0031965;GO:0033017;GO:0046872;GO:0070588;path:mmu04020;path:mmu04972;path:mmu05010;REACT_108918;REACT_32576;REACT_81688;REACT_89750;REACT_93396;REACT_94109;REACT_94160	Alzheimer,s disease - Mus musculus (mouse);ATP binding;calcium-transporting ATPase activity;calcium ion transmembrane transport;Calcium signaling pathway - Mus musculus (mouse);Hemostasis;integral component of membrane;Ion channel transport;Ion transport by P-type ATPases;metabolic process;metal ion binding;nuclear membrane;Pancreatic secretion - Mus musculus (mouse);Platelet calcium homeostasis;…
gene:ENSMUSG00000035804	chr19:52264322-52265456	Ins1	6.72271	12.6564	12.8797	12.9513	13.6582	0	D	Positive	P1	Glycolysis, Glucose processing, Pyruvate metabolism and TCA cycle;GTPase and G-protein activity;Insulin processing and signaling;Oxidation-reduction and Oxygen-mediated activity;Vesicle-mediated transport and secretion by cell	Binding;Biological regulation and behavior;Cell cycle, proliferation, growth and death;Cellular component organization or biogenesis;Developmental process and reproduction;Disease;Environmental information processing, response to stimulus and signaling;Localization and transport;Metabolism;Organelle	GO:0002020;GO:0005179;GO:0005615;GO:0005829;GO:0006006;GO:0014070;GO:0015758;GO:0031018;GO:0032403;GO:0034097;GO:0034774;GO:0043434;GO:0051087;path:mmu04014;path:mmu04066;path:mmu04114;path:mmu04140;path:mmu04150;path:mmu04151;path:mmu04810;path:mmu04910;path:mmu04911;path:mmu04914;path:mmu04917;path:mmu04930;path:mmu04932;path:mmu04940;path:mmu04950;path:mmu04960;REACT_101230;REACT_103713;REACT_…	Aldosterone-regulated sodium reabsorption - Mus musculus (mouse);chaperone binding;cytosol;endocrine pancreas development;extracellular space;glucose metabolic process;glucose transport;HIF-1 signaling pathway - Mus musculus (mouse);hormone activity;Insulin Processing;Insulin receptor recycling;Insulin receptor signalling cascade;Insulin secretion - Mus musculus (mouse);Insulin signaling pathway …
gene:ENSMUSG00000058297	chr10:60106218-60135198	Spock2	5.69942	7.68846	7.72061	7.53307	8.03985	0	D	Positive	P1	Calcium-mediated processing	Adhesion, communication, aggregation and migration;Binding;Cellular component organization or biogenesis;Environmental information processing, response to stimulus and signaling;Metabolism	GO:0005509;GO:0005515;GO:0005539;GO:0005578;GO:0006790;GO:0007165;GO:0018209;GO:0030155;GO:0043062;GO:0044710;GO:1901564	calcium ion binding;extracellular structure organization;glycosaminoglycan binding;organonitrogen compound metabolic process;peptidyl-serine modification;protein binding;proteinaceous extracellular matrix;regulation of cell adhesion;signal transduction;single-organism metabolic process;sulfur compound metabolic process
gene:ENSMUSG00000050711	chr1:79434668-79440090	Scg2	7.46512	11.3357	11.4219	11.2056	11.8641	0	D	Positive	P1	Vesicle-mediated transport and secretion by cell	Adhesion, communication, aggregation and migration;Binding;Cell cycle, proliferation, growth and death;Cellular component organization or biogenesis;Developmental process and reproduction;Environmental information processing, response to stimulus and signaling;Metabolism;Organelle	GO:0005102;GO:0005615;GO:0008284;GO:0016310;GO:0016477;GO:0030141;GO:0035556;GO:0044710;GO:0048646;GO:0050678;GO:0050927;GO:0070887;GO:0072358;GO:2001234;GO:2001236	anatomical structure formation involved in morphogenesis;cardiovascular system development;cell migration;cellular response to chemical stimulus;extracellular space;intracellular signal transduction;negative regulation of apoptotic signaling pathway;phosphorylation;positive regulation of cell proliferation;positive regulation of positive chemotaxis;receptor binding;regulation of epithelial cell p…
gene:ENSMUSG00000005232	chr2:69211072-69227841	G6pc2	6.67802	10.9369	11.7002	11.3334	13.3702	0	D;U	Positive	P1;P60	Glycolysis, Glucose processing, Pyruvate metabolism and TCA cycle;Insulin processing and signaling	Biological regulation and behavior;Biosynthesis and Catalytical activity;Environmental information processing, response to stimulus and signaling;Localization and transport;Membrane;Metabolism;Organelle;System process	GO:0006006;GO:0016021;GO:0016791;GO:0042593;GO:0044432;GO:0044711;GO:0050796;GO:0098588;GO:0098589;GO:1901576;path:mmu04151;path:mmu04910;path:mmu04973;REACT_102834;REACT_112621;REACT_81153;REACT_94160	bounding membrane of organelle;Carbohydrate digestion and absorption - Mus musculus (mouse);endoplasmic reticulum part;glucose homeostasis;glucose metabolic process;Insulin signaling pathway - Mus musculus (mouse);integral component of membrane;membrane region;Metabolism;Metabolism of carbohydrates;organic substance biosynthetic process;phosphatase activity;PI3K-Akt signaling pathway - Mus muscul…
gene:ENSMUSG00000041681	chr6:142298422-142303961	Iapp	8.30966	11.9196	12.0123	12.0918	12.5208	0	D	Positive	P1	GTPase and G-protein activity;Insulin processing and signaling	Binding;Biological regulation and behavior;Cellular component organization or biogenesis;Developmental process and reproduction;Disease;Environmental information processing, response to stimulus and signaling;System process	GO:0005179;GO:0005615;GO:0005829;GO:0019233;GO:0031018;GO:0032844;GO:0042755;GO:0042802;GO:0043025;GO:0045596;GO:0051241;path:mmu04950;REACT_109465;REACT_115202;REACT_33090;REACT_34241;REACT_77799;REACT_85878	Class B/2 (Secretin family receptors);cytosol;eating behavior;endocrine pancreas development;extracellular space;G alpha (s) signalling events;GPCR downstream signaling;GPCR ligand binding;hormone activity;identical protein binding;Maturity onset diabetes of the young - Mus musculus (mouse);negative regulation of cell differentiation;negative regulation of multicellular organismal process;neurona…
gene:ENSMUSG00000021587	chr13:75089825-75132498	Pcsk1	5.41336	8.2076	7.84716	7.78676	8.35174	0	D	Positive	P1	Vesicle-mediated transport and secretion by cell	Biosynthesis and Catalytical activity;Cellular component organization or biogenesis;Environmental information processing, response to stimulus and signaling;Metabolism;Organelle	GO:0004175;GO:0005615;GO:0005788;GO:0005794;GO:0006508;GO:0016486;GO:0030133;GO:0034774;GO:1901576;REACT_115202;REACT_163161;REACT_86675;REACT_93132	endopeptidase activity;endoplasmic reticulum lumen;extracellular space;Golgi apparatus;Metabolism of proteins;organic substance biosynthetic process;Peptide hormone metabolism;peptide hormone processing;proteolysis;secretory granule lumen;Signal Transduction;Signalling by NGF;transport vesicle
gene:ENSMUSG00000024899	chr19:32620004-32667187	Papss2	4.44698	7.00404	6.84379	6.79125	6.52792	0	D	Positive	P1	Unclassified	Binding;Biological regulation and behavior;Biosynthesis and Catalytical activity;Developmental process and reproduction;Metabolism	GO:0005524;GO:0006790;GO:0007596;GO:0016301;GO:0016310;GO:0016773;GO:0048513;REACT_112621	ATP binding;blood coagulation;kinase activity;Metabolism;organ development;phosphorylation;phosphotransferase activity, alcohol group as acceptor;sulfur compound metabolic process
gene:ENSMUSG00000032181	chr9:75643263-75683996	Scg3	8.54087	11.2356	10.6035	10.2639	10.7634	0	D	Positive	P1	Vesicle-mediated transport and secretion by cell	Biological regulation and behavior;Cellular component organization or biogenesis;Genetic Information process;Immune system;Membrane	GO:0005576;GO:0030658;GO:0044822;REACT_103583;REACT_89750	extracellular region;Hemostasis;Platelet activation, signaling and aggregation;poly(A) RNA binding;transport vesicle membrane
gene:ENSMUSG00000021194	chr12:102554968-102565027	Chga	7.79841	11.2425	11.5277	11.8329	11.7109	0	D	Positive	P1	Vesicle-mediated transport and secretion by cell	Binding;Cellular component organization or biogenesis;Membrane;Organelle	GO:0005515;GO:0005576;GO:0030141;GO:0030658;GO:0048471	extracellular region;perinuclear region of cytoplasm;protein binding;secretory granule;transport vesicle membrane
gene:ENSMUSG00000027350	chr2:132781277-132795079	Chgb	8.47855	9.78365	9.36274	9.65103	10.6574	0	D	Positive	P1	Vesicle-mediated transport and secretion by cell	Binding;Cellular component organization or biogenesis;Organelle	GO:0005515;GO:0005576;GO:0030141	extracellular region;protein binding;secretory granule
gene:ENSMUSG00000040035	chr2:118779718-118811293	Disp2	7.73642	9.4843	9.53977	9.50438	9.89428	0	D	Positive	P1	Unclassified	Membrane	GO:0016021	integral component of membrane
gene:ENSMUSG00000027168	chr2:105668899-105697364	Pax6	9.56914	10.3073	10.17	9.86384	9.88922	1.11022e-16	A;D	Positive	E15.5_Ngn3_Het;P1	Glycolysis, Glucose processing, Pyruvate metabolism and TCA cycle;Insulin processing and signaling;Oxoacid metabolic process and Fatty acid activity;Vesicle-mediated transport and secretion by cell	Adhesion, communication, aggregation and migration;Binding;Biological regulation and behavior;Cell cycle, proliferation, growth and death;Cellular component organization or biogenesis;Developmental process and reproduction;Disease;Environmental information processing, response to stimulus and signaling;Genetic Information process;Localization and transport;Organelle	GO:0000904;GO:0000976;GO:0000982;GO:0001754;GO:0001764;GO:0002068;GO:0003309;GO:0003310;GO:0003682;GO:0005737;GO:0006351;GO:0007165;GO:0008134;GO:0009611;GO:0009952;GO:0010975;GO:0019901;GO:0019904;GO:0021513;GO:0021520;GO:0021537;GO:0021549;GO:0030334;GO:0030858;GO:0032869;GO:0034613;GO:0042063;GO:0042461;GO:0042493;GO:0043009;GO:0043010;GO:0043234;GO:0043566;GO:0044428;GO:0045944;GO:0046887;GO:…	anatomical structure formation involved in morphogenesis;anterior/posterior pattern specification;camera-type eye development;cell morphogenesis involved in differentiation;cell projection morphogenesis;cellular protein localization;cellular response to acid chemical;cellular response to glucose stimulus;cellular response to growth factor stimulus;cellular response to insulin stimulus;cellular re…
gene:ENSMUSG00000031748	chr8:93809965-93969388	Gnao1	7.98201	8.62626	8.397	8.18015	7.78199	1.11022e-16	A;D	Positive	E15.5_Ngn3_Het;P1	GTPase and G-protein activity;Ion transport and homeostasis	Adhesion, communication, aggregation and migration;Binding;Biological regulation and behavior;Biosynthesis and Catalytical activity;Developmental process and reproduction;Environmental information processing, response to stimulus and signaling;Localization and transport;System process	GO:0003924;GO:0004871;GO:0005834;GO:0007186;GO:0007626;GO:0008016;GO:0014070;GO:0030182;GO:0030900;GO:0032550;GO:0032561;GO:0035639;GO:0042493;GO:0043005;GO:0043547;GO:0046872;GO:0048468;GO:0051051;GO:0051427;GO:0051924;GO:1901700;path:mmu04713;path:mmu04723;path:mmu04724;path:mmu04725;path:mmu04726;path:mmu04727;path:mmu04728;path:mmu04915;path:mmu05032;path:mmu05034	Alcoholism - Mus musculus (mouse);cell development;Cholinergic synapse - Mus musculus (mouse);Circadian entrainment - Mus musculus (mouse);Dopaminergic synapse - Mus musculus (mouse);Estrogen signaling pathway - Mus musculus (mouse);forebrain development;G-protein coupled receptor signaling pathway;GABAergic synapse - Mus musculus (mouse);Glutamatergic synapse - Mus musculus (mouse);GTPase activi…
gene:ENSMUSG00000004366	chr16:23889580-23890844	Sst	9.5607	11.3832	11.5785	11.323	10.4138	1.11022e-16	A;D	Positive	E15.5_Ngn3_Het;P1	GTPase and G-protein activity	Adhesion, communication, aggregation and migration;Binding;Cellular component organization or biogenesis;Environmental information processing, response to stimulus and signaling;System process	GO:0005179;GO:0005576;GO:0006970;GO:0014070;GO:0030334;GO:0042493;GO:0043025;GO:0043200;REACT_115202;REACT_137560;REACT_32532;REACT_34241;REACT_77799;REACT_85878;REACT_90291	Class A/1 (Rhodopsin-like receptors);extracellular region;G alpha (i) signalling events;GPCR downstream signaling;GPCR ligand binding;hormone activity;neuronal cell body;Peptide ligand-binding receptors;regulation of cell migration;response to amino acid;response to drug;response to organic cyclic compound;response to osmotic stress;Signal Transduction;Signaling by GPCR
gene:ENSMUSG00000037852	chr8:64592557-64693040	Cpe	4.45981	6.67613	6.3872	5.93395	6.36588	1.11022e-16	A;D	Positive	E15.5_Ngn3_Het;P1	Insulin processing and signaling;Vesicle-mediated transport and secretion by cell	Adhesion, communication, aggregation and migration;Binding;Biosynthesis and Catalytical activity;Developmental process and reproduction;Disease;Localization and transport;Membrane;Metabolism;Organelle	GO:0005794;GO:0006508;GO:0007507;GO:0008237;GO:0008238;GO:0008270;GO:0009887;GO:0030070;GO:0030658;GO:0042043;GO:0050839;GO:0070062;GO:0072657;path:mmu04940	cell adhesion molecule binding;exopeptidase activity;extracellular vesicular exosome;Golgi apparatus;heart development;insulin processing;metallopeptidase activity;neurexin family protein binding;organ morphogenesis;protein localization to membrane;proteolysis;transport vesicle membrane;Type I diabetes mellitus - Mus musculus (mouse);zinc ion binding
gene:ENSMUSG00000047507	chr17:25242658-25256364	Baiap3	8.60129	8.40136	8.45447	8.22434	6.95926	1.11022e-16	A;D	Positive	E15.5_Ngn3_Het;P1	GTPase and G-protein activity	Binding;Environmental information processing, response to stimulus and signaling	GO:0005515;GO:0007186	G-protein coupled receptor signaling pathway;protein binding
gene:ENSMUSG00000026163	chr1:83254138-83408200	Sphkap	8.96279	10.3061	10.2577	10.1567	10.4409	1.11022e-16	A;D	Positive	E15.5_Ngn3_Het;P1	Unclassified	Binding;Cellular component organization or biogenesis;Organelle;System process	GO:0005515;GO:0005739;GO:0030016;GO:0044449;GO:0070062	contractile fiber part;extracellular vesicular exosome;mitochondrion;myofibril;protein binding
gene:ENSMUSG00000030683	chr7:126950562-126970606	Sez6l2	5.37762	7.57539	7.65396	7.4565	7.84025	1.11022e-16	D	Positive	P1	Unclassified	Biological regulation and behavior;Cellular component organization or biogenesis;Developmental process and reproduction;Environmental information processing, response to stimulus and signaling;Membrane;System process	GO:0005789;GO:0005886;GO:0008344;GO:0016021;GO:0021680;GO:0021700;GO:0043025;GO:0050808;GO:1902531	adult locomotory behavior;cerebellar Purkinje cell layer development;developmental maturation;endoplasmic reticulum membrane;integral component of membrane;neuronal cell body;plasma membrane;regulation of intracellular signal transduction;synapse organization
gene:ENSMUSG00000031255	chrX:133936384-133981812	Sytl4	3.80034	6.86508	6.10899	5.79253	5.61728	1.11022e-16	D	Positive	P1	GTPase and G-protein activity;Insulin processing and signaling;Vesicle-mediated transport and secretion by cell	Binding;Cellular component organization or biogenesis;Genetic Information process;Localization and transport;Membrane;Organelle	GO:0005543;GO:0005634;GO:0005768;GO:0005815;GO:0006886;GO:0006887;GO:0017137;GO:0019898;GO:0030141;GO:0030658;GO:0042043;GO:0045921;GO:0046676;GO:0046872;GO:0050714	endosome;exocytosis;extrinsic component of membrane;intracellular protein transport;metal ion binding;microtubule organizing center;negative regulation of insulin secretion;neurexin family protein binding;nucleus;phospholipid binding;positive regulation of exocytosis;positive regulation of protein secretion;Rab GTPase binding;secretory granule;transport vesicle membrane
gene:ENSMUSG00000023236	chr2:113776361-113829121	Scg5	6.20134	8.98876	8.77945	8.57985	9.929	1.11022e-16	D	Positive	P1	GTPase and G-protein activity;Vesicle-mediated transport and secretion by cell	Binding;Biosynthesis and Catalytical activity;Cellular component organization or biogenesis;Environmental information processing, response to stimulus and signaling;Localization and transport;Metabolism;Organelle	GO:0004857;GO:0005515;GO:0005576;GO:0006886;GO:0007218;GO:0016486;GO:0030141;GO:0043086;GO:1903530	enzyme inhibitor activity;extracellular region;intracellular protein transport;negative regulation of catalytic activity;neuropeptide signaling pathway;peptide hormone processing;protein binding;regulation of secretion by cell;secretory granule
gene:ENSMUSG00000017311	chr11:102106675-102107832	Pyy	9.03798	8.07841	9.17355	9.14395	4.85867	1.11022e-16	Singleton	Positive	P12			Singleton	Singleton
gene:ENSMUSG00000052727	chr13:99421463-99516602	Map1b	5.14334	5.84099	5.83835	5.51721	4.91706	2.22045e-16	A;D	Positive	E15.5_Ngn3_Het;P1	Unclassified	Adhesion, communication, aggregation and migration;Binding;Biosynthesis and Catalytical activity;Cellular component organization or biogenesis;Developmental process and reproduction;Localization and transport;Membrane;Metabolism;System process	GO:0000226;GO:0005829;GO:0005886;GO:0007163;GO:0008017;GO:0008152;GO:0015630;GO:0016358;GO:0016787;GO:0030054;GO:0030425;GO:0030516;GO:0032387;GO:0043234;GO:0044430;GO:0045202;GO:0047497;GO:0048675;GO:0050772	axon extension;cell junction;cytoskeletal part;cytosol;dendrite;dendrite development;establishment or maintenance of cell polarity;hydrolase activity;metabolic process;microtubule binding;microtubule cytoskeleton;microtubule cytoskeleton organization;mitochondrion transport along microtubule;negative regulation of intracellular transport;plasma membrane;positive regulation of axonogenesis;protein…
gene:ENSMUSG00000069072	chr3:31202909-31310378	Slc7a14	8.35052	9.94831	9.65891	9.35654	9.55071	2.22045e-16	A;D	Positive	E15.5_Ngn3_Het;P1	Ion transport and homeostasis	Biosynthesis and Catalytical activity;Localization and transport;Membrane;Metabolism	GO:0006865;GO:0016021;GO:0034220;GO:0045936;GO:0046943;GO:0051346	amino acid transport;carboxylic acid transmembrane transporter activity;integral component of membrane;ion transmembrane transport;negative regulation of hydrolase activity;negative regulation of phosphate metabolic process
gene:ENSMUSG00000005640	chr3:87796950-87816101	Insrr	5.0329	6.554	6.75221	6.91391	5.58063	3.33067e-16	D;O	Positive	P1;P12	Protein tyrosine and serine/threonine kinase activity	Binding;Biosynthesis and Catalytical activity;Cellular component organization or biogenesis;Environmental information processing, response to stimulus and signaling;Membrane;Metabolism	GO:0004713;GO:0005515;GO:0005887;GO:0007167;GO:0018193;GO:0019199;GO:0031532;GO:0032550;GO:0032559;GO:0035639;GO:0043235;GO:0044707;GO:0046777	actin cytoskeleton reorganization;adenyl ribonucleotide binding;enzyme linked receptor protein signaling pathway;integral component of plasma membrane;peptidyl-amino acid modification;protein autophosphorylation;protein binding;protein tyrosine kinase activity;purine ribonucleoside binding;purine ribonucleoside triphosphate binding;receptor complex;single-multicellular organism process;transmembr…
gene:ENSMUSG00000000394	chr2:62474529-62483650	Gcg	10.6744	9.78289	8.36781	8.57136	6.8358	4.44089e-16	A	Positive	E15.5_Ngn3_Het	Vesicle-mediated transport and secretion by cell	Adhesion, communication, aggregation and migration;Biological regulation and behavior;Environmental information processing, response to stimulus and signaling;Localization and transport;Metabolism	GO:0010646;GO:0023051;GO:0032268;GO:0048585;GO:0050714;GO:0065009	negative regulation of response to stimulus;positive regulation of protein secretion;regulation of cell communication;regulation of cellular protein metabolic process;regulation of molecular function;regulation of signaling
gene:ENSMUSG00000024743	chr19:10389089-10453181	Syt7	5.13797	6.00994	5.8746	5.43362	4.87271	5.55111e-16	A;D	Positive	E15.5_Ngn3_Het;P1	Calcium-mediated processing;Insulin processing and signaling;Vesicle-mediated transport and secretion by cell	Adhesion, communication, aggregation and migration;Binding;Environmental information processing, response to stimulus and signaling;Localization and transport;Membrane;Organelle	GO:0005215;GO:0005509;GO:0005515;GO:0005886;GO:0007009;GO:0009611;GO:0016021;GO:0016192;GO:0030054;GO:0030141;GO:0030672;GO:0032940;GO:0045956;GO:0050796	calcium ion binding;cell junction;integral component of membrane;plasma membrane;plasma membrane organization;positive regulation of calcium ion-dependent exocytosis;protein binding;regulation of insulin secretion;response to wounding;secretion by cell;secretory granule;synaptic vesicle membrane;transporter activity;vesicle-mediated transport
gene:ENSMUSG00000079037	chr2:131909927-131938429	Prnp	3.93991	5.46183	5.29099	5.45726	6.7737	5.55111e-16	D;U	Positive	P1;P60	Ion transport and homeostasis	Adhesion, communication, aggregation and migration;Binding;Biological regulation and behavior;Biosynthesis and Catalytical activity;Cellular component organization or biogenesis;Environmental information processing, response to stimulus and signaling;Genetic Information process;Immune system;Localization and transport;Membrane;Metabolism;Organelle;System process	GO:0001932;GO:0002694;GO:0005576;GO:0005634;GO:0005783;GO:0005794;GO:0006461;GO:0006979;GO:0007611;GO:0008152;GO:0010035;GO:0010468;GO:0010959;GO:0015631;GO:0030155;GO:0031224;GO:0031400;GO:0032403;GO:0034765;GO:0042326;GO:0042802;GO:0046914;GO:0051087;GO:0051241;GO:0070013;GO:0071944;GO:0098589;GO:1902531;GO:1903506;GO:2000112	cell periphery;chaperone binding;endoplasmic reticulum;extracellular region;Golgi apparatus;identical protein binding;intracellular organelle lumen;intrinsic component of membrane;learning or memory;membrane region;metabolic process;negative regulation of multicellular organismal process;negative regulation of phosphorylation;negative regulation of protein modification process;nucleus;protein com…
gene:ENSMUSG00000026204	chr1:75247040-75264208	Ptprn	6.58677	8.69825	9.09138	9.06833	10.4681	7.77156e-16	D;U	Positive	P1;P60	Glycolysis, Glucose processing, Pyruvate metabolism and TCA cycle;GTPase and G-protein activity;Insulin processing and signaling	Binding;Biosynthesis and Catalytical activity;Disease;Environmental information processing, response to stimulus and signaling;Membrane;Metabolism	GO:0005886;GO:0006464;GO:0006979;GO:0007165;GO:0009749;GO:0016791;GO:0030507;GO:0034097;GO:0043434;GO:0043627;GO:0051020;GO:0071310;path:mmu04940	cellular protein modification process;cellular response to organic substance;GTPase binding;phosphatase activity;plasma membrane;response to cytokine;response to estrogen;response to glucose;response to oxidative stress;response to peptide hormone;signal transduction;spectrin binding;Type I diabetes mellitus - Mus musculus (mouse)
gene:ENSMUSG00000046613	chr16:20589470-20605377	Vwa5b2	8.10284	7.82116	7.40488	6.73097	5.6108	9.99201e-16	A	Positive	E15.5_Ngn3_Het			Singleton	Singleton
gene:ENSMUSG00000021337	chr13:23953455-23991214	Scgn	9.76209	11.1706	10.9826	10.8882	10.2986	9.99201e-16	D	Positive	P1	Calcium-mediated processing;Vesicle-mediated transport and secretion by cell	Binding;Cellular component organization or biogenesis;Membrane	GO:0005509;GO:0005576;GO:0030658	calcium ion binding;extracellular region;transport vesicle membrane
gene:ENSMUSG00000041608	chr9:120539817-120568318	Entpd3	4.63098	6.53082	6.18549	5.66379	5.66669	1.11022e-15	D	Positive	P1	Unclassified	Biosynthesis and Catalytical activity;Membrane;Metabolism	GO:0005886;GO:0006753;GO:0016462;GO:0044248;GO:0044712;GO:0046434	cellular catabolic process;nucleoside phosphate metabolic process;organophosphate catabolic process;plasma membrane;pyrophosphatase activity;single-organism catabolic process
gene:ENSMUSG00000026072	chr1:40225079-40316198	Il1r1	2.35742	6.23237	6.29718	6.16409	5.13919	1.11022e-15	D;O	Positive	P1;P12	Unclassified	Binding;Cellular component organization or biogenesis;Disease;Environmental information processing, response to stimulus and signaling;Immune system;Membrane	GO:0002020;GO:0004896;GO:0005576;GO:0005886;GO:0009986;GO:0016021;GO:0019221;GO:0031347;GO:0070851;path:mmu04010;path:mmu05146;REACT_107772	Amoebiasis - Mus musculus (mouse);cell surface;cytokine-mediated signaling pathway;cytokine receptor activity;extracellular region;growth factor receptor binding;Immune System;integral component of membrane;MAPK signaling pathway - Mus musculus (mouse);plasma membrane;protease binding;regulation of defense response
gene:ENSMUSG00000029420	chr5:128760400-128953362	Rimbp2	9.09113	9.93604	9.93483	9.68864	9.28209	1.66534e-15	A;D	Positive	E15.5_Ngn3_Het;P1	Unclassified	Adhesion, communication, aggregation and migration;Binding;Biosynthesis and Catalytical activity;Membrane;Metabolism	GO:0005515;GO:0005886;GO:0030054;GO:0045202;GO:0045936;GO:0051346	cell junction;negative regulation of hydrolase activity;negative regulation of phosphate metabolic process;plasma membrane;protein binding;synapse
gene:ENSMUSG00000031367	chrX:163909016-163933666	Ap1s2	4.5612	5.96844	5.43968	5.4724	4.97514	1.88738e-15	A;D	Positive	E15.5_Ngn3_Het;P1	Vesicle-mediated transport and secretion by cell	Cellular component organization or biogenesis;Localization and transport;Membrane;Organelle	GO:0006886;GO:0008565;GO:0012505;GO:0016192;GO:0030659;GO:0043234;path:mmu04142	cytoplasmic vesicle membrane;endomembrane system;intracellular protein transport;Lysosome - Mus musculus (mouse);protein complex;protein transporter activity;vesicle-mediated transport
gene:ENSMUSG00000034701	chr2:79452520-79456751	Neurod1	10.2922	11.1892	11.1276	10.9687	10.4994	1.9984e-15	A;D	Positive	E15.5_Ngn3_Het;P1	Glycolysis, Glucose processing, Pyruvate metabolism and TCA cycle;Insulin processing and signaling	Adhesion, communication, aggregation and migration;Binding;Cell cycle, proliferation, growth and death;Cellular component organization or biogenesis;Developmental process and reproduction;Disease;Environmental information processing, response to stimulus and signaling;Genetic Information process;Localization and transport;Organelle;System process	GO:0000976;GO:0000982;GO:0003310;GO:0003407;GO:0003682;GO:0003713;GO:0005737;GO:0006351;GO:0008134;GO:0009952;GO:0010648;GO:0016482;GO:0019932;GO:0021537;GO:0021549;GO:0023057;GO:0030073;GO:0030182;GO:0042493;GO:0043065;GO:0043066;GO:0043566;GO:0044057;GO:0044428;GO:0045666;GO:0045944;GO:0048562;GO:0048585;GO:0051091;GO:0051099;GO:0070013;GO:0071156;GO:0071333;GO:1902531;path:mmu04950	anterior/posterior pattern specification;cellular response to glucose stimulus;cerebellum development;chromatin binding;cytoplasm;cytoplasmic transport;embryonic organ morphogenesis;insulin secretion;intracellular organelle lumen;Maturity onset diabetes of the young - Mus musculus (mouse);negative regulation of apoptotic process;negative regulation of cell communication;negative regulation of res…
gene:ENSMUSG00000039278	chrX:7919821-7924410	Pcsk1n	7.74151	9.19417	10.5123	11.0261	10.8777	1.9984e-15	A;D;U	Positive	E15.5_Ngn3_Het;P1;P60	GTPase and G-protein activity;Vesicle-mediated transport and secretion by cell	Biosynthesis and Catalytical activity;Cellular component organization or biogenesis;Environmental information processing, response to stimulus and signaling;Metabolism;Organelle	GO:0004857;GO:0005615;GO:0005802;GO:0007218;GO:0016486;GO:0030141;GO:0051346;GO:0070062	enzyme inhibitor activity;extracellular space;extracellular vesicular exosome;negative regulation of hydrolase activity;neuropeptide signaling pathway;peptide hormone processing;secretory granule;trans-Golgi network
gene:ENSMUSG00000055567	chr1:66468366-66699866	Unc80	4.28218	6.16995	6.48197	6.67669	5.92056	1.9984e-15	D	Positive	P1	Membrane potential and Ion channels	Localization and transport	REACT_163135;REACT_94109;REACT_94160	Ion channel transport;Stimuli-sensing channels;Transmembrane transport of small molecules
gene:ENSMUSG00000068615	chr2:114009600-114013619	Gjd2	8.20321	10.408	10.6992	10.4984	10.0657	2.66453e-15	A;D	Positive	E15.5_Ngn3_Het;P1	Membrane potential and Ion channels	Adhesion, communication, aggregation and migration;Binding;Cellular component organization or biogenesis;Membrane;System process	GO:0005515;GO:0005911;GO:0007268;GO:0007601;GO:0016021;GO:0042391;GO:0043234;GO:0044459;REACT_86563	cell-cell junction;integral component of membrane;Neuronal System;plasma membrane part;protein binding;protein complex;regulation of membrane potential;synaptic transmission;visual perception
gene:ENSMUSG00000079620	chr16:32735885-32782391	Muc4	7.95117	10.3785	9.82458	9.76341	9.04815	2.66453e-15	D	Positive	P1	Unclassified	Adhesion, communication, aggregation and migration;Binding;Developmental process and reproduction;Metabolism	GO:0005515;GO:0022610;GO:0030097;GO:0030154;REACT_120555;REACT_87023	biological adhesion;cell differentiation;hemopoiesis;O-linked glycosylation of mucins;Post-translational protein modification;protein binding
gene:ENSMUSG00000056553	chr12:116485719-117278167	Ptprn2	4.20705	5.23964	5.06289	4.84689	4.35186	2.77556e-15	A;D	Positive	E15.5_Ngn3_Het;P1	GTPase and G-protein activity;Vesicle-mediated transport and secretion by cell	Adhesion, communication, aggregation and migration;Binding;Biosynthesis and Catalytical activity;Environmental information processing, response to stimulus and signaling;Membrane;Metabolism;Organelle	GO:0004725;GO:0005515;GO:0005788;GO:0016021;GO:0030141;GO:0030658;GO:0035335;GO:0043087;GO:0043195;GO:0043235;GO:0051346	endoplasmic reticulum lumen;integral component of membrane;negative regulation of hydrolase activity;peptidyl-tyrosine dephosphorylation;protein binding;protein tyrosine phosphatase activity;receptor complex;regulation of GTPase activity;secretory granule;terminal bouton;transport vesicle membrane
gene:ENSMUSG00000005373	chr5:135106890-135138382	Mlxipl	4.26578	5.10889	5.38481	5.21107	2.9572	2.77556e-15	D;O	Positive	P1;P12	Unclassified	Binding;Biological regulation and behavior;Biosynthesis and Catalytical activity;Cellular component organization or biogenesis;Genetic Information process;Organelle	GO:0010557;GO:0031328;GO:0043231;GO:0044444;GO:0044699;GO:0045935;GO:0048523;GO:0065008;GO:0097159;GO:1901363;GO:2000112	cytoplasmic part;heterocyclic compound binding;intracellular membrane-bounded organelle;negative regulation of cellular process;organic cyclic compound binding;positive regulation of cellular biosynthetic process;positive regulation of macromolecule biosynthetic process;positive regulation of nucleobase-containing compound metabolic process;regulation of biological quality;regulation of cellular …
gene:ENSMUSG00000067786	chr2:157560077-157562522	Nnat	5.79869	7.33757	5.02507	3.52618	0.162449	3.10862e-15	Singleton	Positive	P1			Singleton	Singleton
gene:ENSMUSG00000015401	chrX:164088829-164118860	Tmem27	5.80081	6.87543	7.01135	6.54294	7.1314	3.33067e-15	A;D;U	Positive	E15.5_Ngn3_Het;P1;P60	Insulin processing and signaling;Ion transport and homeostasis;Vesicle-mediated transport and secretion by cell	Binding;Biological regulation and behavior;Biosynthesis and Catalytical activity;Cellular component organization or biogenesis;Environmental information processing, response to stimulus and signaling;Localization and transport;Membrane;Metabolism;Organelle	GO:0005515;GO:0005737;GO:0006508;GO:0008237;GO:0008238;GO:0010638;GO:0016021;GO:0031253;GO:0031334;GO:0032024;GO:0032846;GO:0045956;GO:0048584;GO:0051952;GO:0070062;GO:1903793	cell projection membrane;cytoplasm;exopeptidase activity;extracellular vesicular exosome;integral component of membrane;metallopeptidase activity;positive regulation of anion transport;positive regulation of calcium ion-dependent exocytosis;positive regulation of homeostatic process;positive regulation of insulin secretion;positive regulation of organelle organization;positive regulation of prote…
gene:ENSMUSG00000057897	chr11:5969643-6066362	Camk2b	6.46438	8.08508	8.29331	8.40228	7.88622	3.66374e-15	A;D	Positive	E15.5_Ngn3_Het;P1	Calcium-mediated processing;GTPase and G-protein activity;Insulin processing and signaling;Ion transport and homeostasis;Protein tyrosine and serine/threonine kinase activity;Vesicle-mediated transport and secretion by cell	Adhesion, communication, aggregation and migration;Binding;Biological regulation and behavior;Biosynthesis and Catalytical activity;Cell cycle, proliferation, growth and death;Cellular component organization or biogenesis;Developmental process and reproduction;Disease;Environmental information processing, response to stimulus and signaling;Immune system;Localization and transport;Membrane;Metabol…	GO:0001775;GO:0004674;GO:0004713;GO:0005516;GO:0005524;GO:0005829;GO:0006816;GO:0009566;GO:0009967;GO:0010038;GO:0010638;GO:0015630;GO:0018209;GO:0033017;GO:0043065;GO:0043234;GO:0044430;GO:0044772;GO:0045666;GO:0045744;GO:0045787;GO:0046777;GO:0048169;GO:0048814;GO:0050885;path:mmu04012;path:mmu04020;path:mmu04713;path:mmu04720;path:mmu04722;path:mmu04725;path:mmu04728;path:mmu04911;path:mmu0491…	Amphetamine addiction - Mus musculus (mouse);ATP binding;calcium ion transport;Calcium signaling pathway - Mus musculus (mouse);calmodulin binding;cell activation;Cholinergic synapse - Mus musculus (mouse);Circadian entrainment - Mus musculus (mouse);cytoskeletal part;cytosol;Dopaminergic synapse - Mus musculus (mouse);ErbB signaling pathway - Mus musculus (mouse);fertilization;Glioma - Mus muscu…
gene:ENSMUSG00000019796	chr10:7589799-7625483	Lrp11	4.88706	6.65152	6.23066	6.18212	6.10606	3.88578e-15	D	Positive	P1	Vesicle-mediated transport and secretion by cell	Binding;Localization and transport;Membrane	GO:0005515;GO:0006897;GO:0016021	endocytosis;integral component of membrane;protein binding
gene:ENSMUSG00000018339	chr11:54902452-54910377	Gpx3	2.86664	5.8096	5.28926	4.06437	5.66041	4.10782e-15	D;U	Positive	P1;P60	Unclassified	Biosynthesis and Catalytical activity;Cellular component organization or biogenesis;Organelle	GO:0003824;GO:0016043;GO:0070062	catalytic activity;cellular component organization;extracellular vesicular exosome
gene:ENSMUSG00000068154	chr2:146221920-146225016	Insm1	6.52572	6.14675	6.22225	5.8903	5.96141	4.44089e-15	A	Positive	E15.5_Ngn3_Het	Unclassified	Binding;Biosynthesis and Catalytical activity;Cell cycle, proliferation, growth and death;Cellular component organization or biogenesis;Developmental process and reproduction;Genetic Information process;Metabolism	GO:0001932;GO:0002068;GO:0003309;GO:0003310;GO:0003682;GO:0003700;GO:0005515;GO:0005634;GO:0005829;GO:0006357;GO:0010467;GO:0030182;GO:0034645;GO:0042423;GO:0043234;GO:0043566;GO:0045892;GO:0045936;GO:0046872;GO:0048732;GO:0071156;GO:0097659;GO:2000179	catecholamine biosynthetic process;cellular macromolecule biosynthetic process;chromatin binding;cytosol;gene expression;gland development;glandular epithelial cell development;metal ion binding;negative regulation of phosphate metabolic process;negative regulation of transcription, DNA-templated;neuron differentiation;nucleic acid-templated transcription;nucleus;pancreatic A cell differentiation…
gene:ENSMUSG00000044156	chr6:3457088-3498297	Hepacam2	5.33565	6.63646	6.45178	5.98662	6.02414	5.21805e-15	A;D	Positive	E15.5_Ngn3_Het;P1	Unclassified	Binding;Cell cycle, proliferation, growth and death;Cellular component organization or biogenesis;Membrane	GO:0000139;GO:0000226;GO:0000280;GO:0005515;GO:0005813;GO:0016021;GO:0030496;GO:1903047	centrosome;Golgi membrane;integral component of membrane;microtubule cytoskeleton organization;midbody;mitotic cell cycle process;nuclear division;protein binding
gene:ENSMUSG00000021303	chr13:13784058-13827897	Gng4	8.9609	10.585	10.8637	10.5088	10.1971	5.55112e-15	A;D	Positive	E15.5_Ngn3_Het;P1	GTPase and G-protein activity;Insulin processing and signaling;Membrane potential and Ion channels	Adhesion, communication, aggregation and migration;Binding;Biological regulation and behavior;Biosynthesis and Catalytical activity;Cell cycle, proliferation, growth and death;Environmental information processing, response to stimulus and signaling;Localization and transport;Membrane;Metabolism;System process	GO:0001558;GO:0003924;GO:0004871;GO:0005515;GO:0005834;GO:0007186;GO:0048523;path:mmu04014;path:mmu04062;path:mmu04713;path:mmu04723;path:mmu04724;path:mmu04725;path:mmu04726;path:mmu04727;path:mmu04728;path:mmu05032;path:mmu05034;REACT_104910;REACT_105339;REACT_105810;REACT_106459;REACT_108208;REACT_109210;REACT_112621;REACT_115202;REACT_136556;REACT_32266;REACT_33090;REACT_42352;REACT_77799;REA…	Activation of G protein gated Potassium channels;Activation of GABAB receptors;Alcoholism - Mus musculus (mouse);Aquaporin-mediated transport;Chemokine signaling pathway - Mus musculus (mouse);Cholinergic synapse - Mus musculus (mouse);Circadian entrainment - Mus musculus (mouse);Class B/2 (Secretin family receptors);Dopaminergic synapse - Mus musculus (mouse);G-protein coupled receptor signaling…
gene:ENSMUSG00000040136	chr7:46104522-46180033	Abcc8	3.87823	4.82961	5.00373	4.77287	4.53531	5.66214e-15	A;D	Positive	E15.5_Ngn3_Het;P1	Insulin processing and signaling;Ion transport and homeostasis;Membrane potential and Ion channels	Binding;Biosynthesis and Catalytical activity;Disease;Environmental information processing, response to stimulus and signaling;Localization and transport;Metabolism;System process	GO:0005524;GO:0007165;GO:0008076;GO:0015405;GO:0016820;GO:0016887;GO:0030001;GO:0038023;GO:0044325;GO:0055085;path:mmu02010;path:mmu04911;path:mmu04930;REACT_105810;REACT_108208;REACT_110770;REACT_112621;REACT_42352;REACT_86563;REACT_88236;REACT_94160	ABC-family proteins mediated transport;ABC transporters - Mus musculus (mouse);ATP binding;ATPase activity;hydrolase activity, acting on acid anhydrides, catalyzing transmembrane movement of substances;Insulin secretion - Mus musculus (mouse);Integration of energy metabolism;Inwardly rectifying K+ channels;ion channel binding;Metabolism;metal ion transport;Neuronal System;P-P-bond-hydrolysis-driv…
gene:ENSMUSG00000022479	chr15:97854424-97910630	Vdr	4.93889	6.32243	6.72487	6.04454	7.25793	6.77236e-15	A;D;U	Positive	E15.5_Ngn3_Het;P1;P60	Ion transport and homeostasis	Binding;Biological regulation and behavior;Biosynthesis and Catalytical activity;Cell cycle, proliferation, growth and death;Developmental process and reproduction;Environmental information processing, response to stimulus and signaling;Genetic Information process;Localization and transport;Metabolism;System process	GO:0000981;GO:0005496;GO:0005634;GO:0006351;GO:0006816;GO:0006874;GO:0007595;GO:0008270;GO:0009755;GO:0009887;GO:0010558;GO:0019218;GO:0019842;GO:0022600;GO:0030858;GO:0031670;GO:0038023;GO:0043065;GO:0043085;GO:0043178;GO:0043565;GO:0044703;GO:0045934;GO:0045944;GO:0048609;GO:0048754;GO:0050678;GO:0051427;GO:0071396;GO:0097306	alcohol binding;branching morphogenesis of an epithelial tube;calcium ion transport;cellular calcium ion homeostasis;cellular response to alcohol;cellular response to lipid;cellular response to nutrient;digestive system process;hormone-mediated signaling pathway;hormone receptor binding;lactation;multi-organism reproductive process;multicellular organismal reproductive process;negative regulation…
gene:ENSMUSG00000005268	chr15:10177237-10349180	Prlr	-0.607523	6.44923	6.78548	7.69567	9.68403	6.99441e-15	U;V	Positive	P60	Protein tyrosine and serine/threonine kinase activity	Binding;Biological regulation and behavior;Cellular component organization or biogenesis;Developmental process and reproduction;Environmental information processing, response to stimulus and signaling;Immune system	GO:0005515;GO:0016043;GO:0030154;GO:0035556;GO:0044085;GO:0044464;GO:0060749;GO:0065008;path:mmu04630;path:mmu04917;REACT_107772;REACT_91328	cell differentiation;cell part;cellular component biogenesis;cellular component organization;Cytokine Signaling in Immune system;Immune System;intracellular signal transduction;Jak-STAT signaling pathway - Mus musculus (mouse);mammary gland alveolus development;Prolactin signaling pathway - Mus musculus (mouse);protein binding;regulation of biological quality
gene:ENSMUSG00000025738	chr17:25809084-25821244	Fbxl16	6.66346	7.81212	7.9991	7.78063	8.07749	8.54872e-15	A;D	Positive	E15.5_Ngn3_Het;P1	Unclassified	Binding;Cellular component organization or biogenesis	GO:0005515;GO:0005737	cytoplasm;protein binding
gene:ENSMUSG00000046593	chr4:40472179-40477168	Tmem215	7.1303	12.1607	12.3956	12.2625	12.4922	9.4369e-15	D	Positive	P1	Unclassified	Membrane	GO:0016021	integral component of membrane
gene:ENSMUSG00000028137	chr3:94478830-94492193	Celf3	6.47837	6.86429	6.85245	6.56881	6.53221	9.54792e-15	A;D	Positive	E15.5_Ngn3_Het;P1	Unclassified	Cellular component organization or biogenesis;Developmental process and reproduction;Genetic Information process;Localization and transport;Metabolism	GO:0003723;GO:0005634;GO:0005737;GO:0010467;GO:0010628;GO:0019953;GO:0044702;GO:0045935;GO:0046483;GO:0051179	cytoplasm;gene expression;heterocycle metabolic process;localization;nucleus;positive regulation of gene expression;positive regulation of nucleobase-containing compound metabolic process;RNA binding;sexual reproduction;single organism reproductive process
gene:ENSMUSG00000031327	chrX:103356475-103396092	Chic1	3.15979	4.9535	5.17847	4.91625	5.20004	1.04361e-14	D;U	Positive	P1;P60	Vesicle-mediated transport and secretion by cell	Membrane;Organelle	GO:0005886;GO:0016023	cytoplasmic membrane-bounded vesicle;plasma membrane
gene:ENSMUSG00000074622	chr2:160363676-160367065	Mafb	5.25135	6.89525	6.16896	5.20367	1.00752	1.18794e-14	E	Positive	P1	Unclassified	Adhesion, communication, aggregation and migration;Binding;Biological regulation and behavior;Biosynthesis and Catalytical activity;Developmental process and reproduction;Genetic Information process	GO:0005515;GO:0007155;GO:0010467;GO:0010468;GO:0034645;GO:0044763;GO:0045596;GO:0048522;GO:0048839;GO:0097659;GO:1903506;GO:2000112	cell adhesion;cellular macromolecule biosynthetic process;gene expression;inner ear development;negative regulation of cell differentiation;nucleic acid-templated transcription;positive regulation of cellular process;protein binding;regulation of cellular macromolecule biosynthetic process;regulation of gene expression;regulation of nucleic acid-templated transcription;single-organism cellular pr…
gene:ENSMUSG00000027004	chr2:80411969-80447625	Frzb	3.24599	6.5401	7.04045	7.2611	5.72874	1.23235e-14	D;O	Positive	P1;P12	Unclassified	Binding;Biological regulation and behavior;Cell cycle, proliferation, growth and death;Cellular component organization or biogenesis;Developmental process and reproduction;Environmental information processing, response to stimulus and signaling;Genetic Information process	GO:0004871;GO:0005576;GO:0006355;GO:0008285;GO:0016055;GO:0019904;GO:0030178;GO:0042472;GO:0043065;GO:0044424;GO:0045596;GO:0048729;GO:0051128;GO:0051241;GO:0060322;GO:0060485;GO:0072358	cardiovascular system development;extracellular region;head development;inner ear morphogenesis;intracellular part;mesenchyme development;negative regulation of cell differentiation;negative regulation of cell proliferation;negative regulation of multicellular organismal process;negative regulation of Wnt signaling pathway;positive regulation of apoptotic process;protein domain specific binding;r…
gene:ENSMUSG00000028976	chr4:150119282-150144169	Slc2a5	5.15284	8.10228	7.97918	8.04909	8.24725	1.35447e-14	D	Positive	P1	Glycolysis, Glucose processing, Pyruvate metabolism and TCA cycle	Environmental information processing, response to stimulus and signaling;Localization and transport;Membrane;Metabolism;Organelle;System process	GO:0015758;GO:0016021;GO:0016324;GO:0022891;GO:0055085;GO:0070062;GO:0071322;path:mmu04973;REACT_102834;REACT_112621;REACT_81153;REACT_94160	apical plasma membrane;Carbohydrate digestion and absorption - Mus musculus (mouse);cellular response to carbohydrate stimulus;extracellular vesicular exosome;glucose transport;integral component of membrane;Metabolism;Metabolism of carbohydrates;SLC-mediated transmembrane transport;substrate-specific transmembrane transporter activity;transmembrane transport;Transmembrane transport of small mole…
gene:ENSMUSG00000010505	chr2:181763331-181827797	Myt1	9.1566	9.34128	8.7581	8.44325	7.52213	1.42109e-14	A	Positive	E15.5_Ngn3_Het	Unclassified	Binding;Biosynthesis and Catalytical activity;Developmental process and reproduction;Genetic Information process	GO:0000976;GO:0003700;GO:0005515;GO:0005634;GO:0008270;GO:0010467;GO:0010468;GO:0034645;GO:0048869;GO:0097659;GO:1903506;GO:2000112	cellular developmental process;cellular macromolecule biosynthetic process;gene expression;nucleic acid-templated transcription;nucleus;protein binding;regulation of cellular macromolecule biosynthetic process;regulation of gene expression;regulation of nucleic acid-templated transcription;sequence-specific DNA binding transcription factor activity;transcription regulatory region sequence-specifi…
gene:ENSMUSG00000031596	chr8:40862395-40922308	Slc7a2	3.45241	5.2083	4.49476	4.51906	3.46736	1.44329e-14	D	Positive	P1	Ion transport and homeostasis	Cellular component organization or biogenesis;Environmental information processing, response to stimulus and signaling;Localization and transport;Metabolism	GO:0005737;GO:0006954;GO:0034641;GO:0046943;GO:0048583;GO:1902475;REACT_146056;REACT_94160	carboxylic acid transmembrane transporter activity;cellular nitrogen compound metabolic process;cytoplasm;inflammatory response;L-alpha-amino acid transmembrane transport;regulation of response to stimulus;Transmembrane transport of small molecules;Transport of inorganic cations/anions and amino acids/oligopeptides
gene:ENSMUSG00000014602	chr1:93015455-93101865	Kif1a	3.5941	5.70163	5.74759	5.65949	5.92255	1.63203e-14	D	Positive	P1	Unclassified	Adhesion, communication, aggregation and migration;Binding;Biosynthesis and Catalytical activity;Cellular component organization or biogenesis;Genetic Information process;Metabolism;System process	GO:0003777;GO:0005524;GO:0005634;GO:0005737;GO:0005871;GO:0005874;GO:0007018;GO:0008017;GO:0008152;GO:0043005;GO:0043025	ATP binding;cytoplasm;kinesin complex;metabolic process;microtubule;microtubule-based movement;microtubule binding;microtubule motor activity;neuron projection;neuronal cell body;nucleus
gene:ENSMUSG00000006651	chr7:30434980-30445582	Aplp1	3.97081	4.57309	4.41872	4.01202	4.04138	1.69864e-14	A;D	Positive	E15.5_Ngn3_Het;P1	GTPase and G-protein activity;Vesicle-mediated transport and secretion by cell	Adhesion, communication, aggregation and migration;Binding;Biosynthesis and Catalytical activity;Cell cycle, proliferation, growth and death;Cellular component organization or biogenesis;Developmental process and reproduction;Environmental information processing, response to stimulus and signaling;Genetic Information process;Localization and transport;Membrane;Metabolism	GO:0005539;GO:0005886;GO:0006897;GO:0008219;GO:0010467;GO:0010468;GO:0012505;GO:0016021;GO:0022610;GO:0030817;GO:0030900;GO:0031327;GO:0031690;GO:0043062;GO:0043168;GO:0045980;GO:0046483;GO:0046914;GO:0048471;GO:0071407;GO:0071417;GO:1901681;GO:1901701;GO:2000112	adrenergic receptor binding;anion binding;biological adhesion;cell death;cellular response to organic cyclic compound;cellular response to organonitrogen compound;cellular response to oxygen-containing compound;endocytosis;endomembrane system;extracellular structure organization;forebrain development;gene expression;glycosaminoglycan binding;heterocycle metabolic process;integral component of mem…
gene:ENSMUSG00000032890	chr4:120854815-120896579	Rims3	3.19018	7.1354	6.27436	6.50501	6.7804	1.86517e-14	D	Positive	P1	Membrane potential and Ion channels;Vesicle-mediated transport and secretion by cell	Adhesion, communication, aggregation and migration;Binding;Localization and transport	GO:0006836;GO:0006887;GO:0030054;GO:0044325;GO:0045202;GO:2000300	cell junction;exocytosis;ion channel binding;neurotransmitter transport;regulation of synaptic vesicle exocytosis;synapse
gene:ENSMUSG00000022490	chr15:103530278-103537992	Ppp1r1a	6.51416	9.56205	9.21818	9.06197	9.47355	1.87628e-14	A;D	Positive	E15.5_Ngn3_Het;P1	Oxidation-reduction and Oxygen-mediated activity	Adhesion, communication, aggregation and migration;Binding;Biosynthesis and Catalytical activity;Cellular component organization or biogenesis;Environmental information processing, response to stimulus and signaling;Metabolism	GO:0004857;GO:0005515;GO:0005615;GO:0005737;GO:0007165;GO:0015980;GO:0019888;GO:0043086;GO:0043170;GO:0044262;path:mmu04720	cellular carbohydrate metabolic process;cytoplasm;energy derivation by oxidation of organic compounds;enzyme inhibitor activity;extracellular space;Long-term potentiation - Mus musculus (mouse);macromolecule metabolic process;negative regulation of catalytic activity;protein binding;protein phosphatase regulator activity;signal transduction
gene:ENSMUSG00000019900	chr10:51677755-51730429	Rfx6	9.36665	9.59729	8.86592	9.00357	7.92592	2.18714e-14	A	Positive	E15.5_Ngn3_Het	Glycolysis, Glucose processing, Pyruvate metabolism and TCA cycle;Insulin processing and signaling	Binding;Biological regulation and behavior;Biosynthesis and Catalytical activity;Developmental process and reproduction;Genetic Information process;Localization and transport	GO:0003309;GO:0003310;GO:0003677;GO:0005515;GO:0005634;GO:0010467;GO:0010628;GO:0034645;GO:0042593;GO:0050796;GO:0097659;GO:1902680;GO:1903506;GO:2000112	cellular macromolecule biosynthetic process;DNA binding;gene expression;glucose homeostasis;nucleic acid-templated transcription;nucleus;pancreatic A cell differentiation;positive regulation of gene expression;positive regulation of RNA biosynthetic process;protein binding;regulation of cellular macromolecule biosynthetic process;regulation of insulin secretion;regulation of nucleic acid-template…
gene:ENSMUSG00000046447	chr4:138454313-138460123	Camk2n1	3.35558	4.93075	4.70294	4.60948	4.79586	2.18714e-14	D	Positive	P1	Unclassified	Adhesion, communication, aggregation and migration;Binding;Biosynthesis and Catalytical activity;Membrane;Metabolism;System process	GO:0001932;GO:0014069;GO:0019210;GO:0019887;GO:0019901;GO:0030054;GO:0030425;GO:0031400;GO:0042326;GO:0043025;GO:0043549;GO:0045211;GO:0051348	cell junction;dendrite;kinase inhibitor activity;negative regulation of phosphorylation;negative regulation of protein modification process;negative regulation of transferase activity;neuronal cell body;postsynaptic density;postsynaptic membrane;protein kinase binding;protein kinase regulator activity;regulation of kinase activity;regulation of protein phosphorylation
gene:ENSMUSG00000058153	chr5:112419150-112577198	Sez6l	5.8711	8.79944	9.20941	9.00809	7.44188	2.36478e-14	D;O	Positive	P1;P12	Unclassified	Biological regulation and behavior;Cellular component organization or biogenesis;Developmental process and reproduction;Environmental information processing, response to stimulus and signaling;Localization and transport;Membrane;Organelle;System process	GO:0005886;GO:0008344;GO:0016021;GO:0021680;GO:0021700;GO:0042175;GO:0043025;GO:0044432;GO:0050808;GO:0098588;GO:1902531	adult locomotory behavior;bounding membrane of organelle;cerebellar Purkinje cell layer development;developmental maturation;endoplasmic reticulum part;integral component of membrane;neuronal cell body;nuclear outer membrane-endoplasmic reticulum membrane network;plasma membrane;regulation of intracellular signal transduction;synapse organization
gene:ENSMUSG00000054423	chr14:12372562-12823079	Cadps	7.40099	7.9166	8.01205	7.91466	8.12148	3.06422e-14	A;D	Positive	E15.5_Ngn3_Het;P1	Vesicle-mediated transport and secretion by cell	Adhesion, communication, aggregation and migration;Binding;Localization and transport;Membrane	GO:0005515;GO:0008289;GO:0015031;GO:0016082;GO:0030054;GO:0030659;GO:0045202;GO:0046872	cell junction;cytoplasmic vesicle membrane;lipid binding;metal ion binding;protein binding;protein transport;synapse;synaptic vesicle priming
gene:ENSMUSG00000037996	chr4:86983123-87230477	Slc24a2	8.09112	11.8848	12.346	12.5748	11.8894	3.08642e-14	D	Positive	P1	Calcium-mediated processing;Ion transport and homeostasis;Membrane potential and Ion channels	Binding;Biological regulation and behavior;Localization and transport;Membrane;System process	GO:0005261;GO:0005509;GO:0005515;GO:0006874;GO:0007612;GO:0007613;GO:0015077;GO:0015491;GO:0016021;GO:0031420;GO:0035725;GO:0044459;GO:0060291;GO:0070588;GO:0072509;REACT_146056;REACT_81153;REACT_94160	alkali metal ion binding;calcium ion binding;calcium ion transmembrane transport;cation channel activity;cation:cation antiporter activity;cellular calcium ion homeostasis;divalent inorganic cation transmembrane transporter activity;integral component of membrane;learning;long-term synaptic potentiation;memory;monovalent inorganic cation transmembrane transporter activity;plasma membrane part;pro…
gene:ENSMUSG00000038375	chr2:155381058-155389850	Trp53inp2	2.82482	4.50123	4.44399	4.57463	4.67888	3.37508e-14	D	Positive	P1	Unclassified	Binding;Biosynthesis and Catalytical activity;Cellular component organization or biogenesis;Developmental process and reproduction;Genetic Information process;Metabolism;Organelle;System process	GO:0001503;GO:0005515;GO:0005654;GO:0005773;GO:0005829;GO:0006355;GO:0006996;GO:0010467;GO:0010506;GO:0010628;GO:0016236;GO:0022607;GO:0030154;GO:0031331;GO:0034645;GO:0097659;GO:1902680	cell differentiation;cellular component assembly;cellular macromolecule biosynthetic process;cytosol;gene expression;macroautophagy;nucleic acid-templated transcription;nucleoplasm;organelle organization;ossification;positive regulation of cellular catabolic process;positive regulation of gene expression;positive regulation of RNA biosynthetic process;protein binding;regulation of autophagy;regul…
gene:ENSMUSG00000054728	chr13:42680622-43138526	Phactr1	4.91177	8.34119	8.46709	8.45681	8.49181	3.475e-14	D	Positive	P1	Unclassified	Adhesion, communication, aggregation and migration;Binding;Biosynthesis and Catalytical activity;Cellular component organization or biogenesis;Genetic Information process;Localization and transport	GO:0003779;GO:0004857;GO:0005634;GO:0005829;GO:0019888;GO:0030054;GO:0031532;GO:0040011;GO:0043086;GO:0045202;GO:0051017;GO:0051179	actin binding;actin cytoskeleton reorganization;actin filament bundle assembly;cell junction;cytosol;enzyme inhibitor activity;localization;locomotion;negative regulation of catalytic activity;nucleus;protein phosphatase regulator activity;synapse
gene:ENSMUSG00000019838	chr10:40033534-40142254	Slc16a10	3.33632	4.84742	5.05961	4.34714	4.6275	4.37428e-14	D	Positive	P1	Ion transport and homeostasis	Localization and transport;Membrane	GO:0016021;GO:0016323;GO:0055085;REACT_146056;REACT_81153;REACT_94160	basolateral plasma membrane;integral component of membrane;SLC-mediated transmembrane transport;transmembrane transport;Transmembrane transport of small molecules;Transport of inorganic cations/anions and amino acids/oligopeptides
gene:ENSMUSG00000021803	chr14:37077849-37098311	Cdhr1	8.5812	11.431	10.6443	10.3583	9.63203	4.4631e-14	D	Positive	P1	Calcium-mediated processing	Adhesion, communication, aggregation and migration;Binding;Biological regulation and behavior;Cellular component organization or biogenesis;Membrane;System process	GO:0001750;GO:0005509;GO:0005515;GO:0005887;GO:0007156;GO:0031253;GO:0044441;GO:0045494;GO:0098588;GO:0098590	bounding membrane of organelle;calcium ion binding;cell projection membrane;ciliary part;homophilic cell adhesion via plasma membrane adhesion molecules;integral component of plasma membrane;photoreceptor cell maintenance;photoreceptor outer segment;plasma membrane region;protein binding
gene:ENSMUSG00000036198	chrX:49463944-49500244	Arhgap36	7.80646	11.4723	9.80601	8.14507	6.74432	4.5075e-14	D	Positive	P1	GTPase and G-protein activity	Biosynthesis and Catalytical activity;Cellular component organization or biogenesis	GO:0005622;GO:0043087	intracellular;regulation of GTPase activity
gene:ENSMUSG00000038178	chr11:75531693-75577575	Slc43a2	3.21733	4.99656	4.60296	4.91409	3.91366	4.67404e-14	D	Positive	P1	Ion transport and homeostasis	Localization and transport;Membrane	GO:0005886;GO:0016021;GO:0046943;GO:1902475;REACT_146056;REACT_94160	carboxylic acid transmembrane transporter activity;integral component of membrane;L-alpha-amino acid transmembrane transport;plasma membrane;Transmembrane transport of small molecules;Transport of inorganic cations/anions and amino acids/oligopeptides
gene:ENSMUSG00000035847	chrX:70343068-70365084	Ids	3.69105	3.78848	4.0908	4.05878	4.22075	5.4512e-14	A;D	Positive	E15.5_Ngn3_Het;P1	Unclassified	Binding;Biosynthesis and Catalytical activity;Organelle	GO:0005515;GO:0005773;GO:0016787;GO:0046872;path:mmu04142	hydrolase activity;Lysosome - Mus musculus (mouse);metal ion binding;protein binding;vacuole
gene:ENSMUSG00000070802	chr7:16944681-16948828	Pnmal2	2.92303	4.16598	4.44154	4.45334	4.40853	6.67244e-14	D	Positive	P1			Singleton	Singleton
gene:ENSMUSG00000026797	chr2:32787601-32847239	Stxbp1	3.7727	5.56819	5.29574	5.37192	5.47727	6.89449e-14	A;D	Positive	E15.5_Ngn3_Het;P1	Vesicle-mediated transport and secretion by cell	Adhesion, communication, aggregation and migration;Binding;Biological regulation and behavior;Cell cycle, proliferation, growth and death;Cellular component organization or biogenesis;Developmental process and reproduction;Environmental information processing, response to stimulus and signaling;Genetic Information process;Localization and transport;Membrane;Organelle;System process	GO:0001775;GO:0005739;GO:0005886;GO:0006887;GO:0007269;GO:0007274;GO:0007409;GO:0007596;GO:0016188;GO:0016337;GO:0017075;GO:0019901;GO:0019904;GO:0022406;GO:0030141;GO:0031647;GO:0042802;GO:0042981;GO:0043069;GO:0043234;GO:0044822;GO:0045184;GO:0045956;GO:0047485;GO:0048167;GO:0070062;GO:0071702;GO:1901215;GO:2000300;path:mmu04721;REACT_106459;REACT_144401;REACT_29928;REACT_30788;REACT_86563;REAC…	Acetylcholine Neurotransmitter Release Cycle;axonogenesis;blood coagulation;cell activation;establishment of protein localization;exocytosis;extracellular vesicular exosome;GABA synthesis, release, reuptake and degradation;Glutamate Neurotransmitter Release Cycle;identical protein binding;membrane docking;mitochondrion;negative regulation of neuron death;negative regulation of programmed cell dea…
gene:ENSMUSG00000026442	chr1:132564690-132741797	Nfasc	4.40534	6.34046	6.57671	6.66685	6.72141	6.92779e-14	D	Positive	P1	Membrane potential and Ion channels	Adhesion, communication, aggregation and migration;Binding;Cellular component organization or biogenesis;Developmental process and reproduction;Localization and transport;Membrane;Organelle;System process	GO:0005515;GO:0005886;GO:0005911;GO:0007043;GO:0007411;GO:0016021;GO:0016337;GO:0019226;GO:0032288;GO:0033270;GO:0045162;GO:0050808;GO:0051179;GO:0070062;REACT_127416;REACT_30240;REACT_92778	axon guidance;Axon guidance;cell-cell junction;cell-cell junction assembly;clustering of voltage-gated sodium channels;Developmental Biology;extracellular vesicular exosome;integral component of membrane;localization;myelin assembly;Neurofascin interactions;paranode region of axon;plasma membrane;protein binding;single organismal cell-cell adhesion;synapse organization;transmission of nerve impul…
gene:ENSMUSG00000030873	chr7:121865110-121918515	Scnn1b	6.21014	10.4499	11.1047	11.021	10.59	7.41629e-14	D	Positive	P1	Ion transport and homeostasis;Membrane potential and Ion channels	Binding;Biological regulation and behavior;Environmental information processing, response to stimulus and signaling;Localization and transport;Membrane;Organelle;System process	GO:0005887;GO:0009897;GO:0015280;GO:0016324;GO:0019904;GO:0034706;GO:0035725;GO:0050891;GO:0050909;GO:0055065;GO:0055067;GO:0070062;path:mmu04742;path:mmu04960;REACT_163135;REACT_94109;REACT_94160	Aldosterone-regulated sodium reabsorption - Mus musculus (mouse);apical plasma membrane;external side of plasma membrane;extracellular vesicular exosome;integral component of plasma membrane;Ion channel transport;ligand-gated sodium channel activity;metal ion homeostasis;monovalent inorganic cation homeostasis;multicellular organismal water homeostasis;protein domain specific binding;sensory perc…
gene:ENSMUSG00000041798	chr11:5900819-5950081	Gck	4.86407	5.97231	5.64011	5.48446	4.87283	7.51621e-14	A;D	Positive	E15.5_Ngn3_Het;P1	Glycolysis, Glucose processing, Pyruvate metabolism and TCA cycle;Insulin processing and signaling;Ion transport and homeostasis;Oxidation-reduction and Oxygen-mediated activity;Oxoacid metabolic process and Fatty acid activity;Vesicle-mediated transport and secretion by cell	Adhesion, communication, aggregation and migration;Binding;Biological regulation and behavior;Biosynthesis and Catalytical activity;Cellular component organization or biogenesis;Developmental process and reproduction;Disease;Environmental information processing, response to stimulus and signaling;Genetic Information process;Localization and transport;Metabolism;Organelle	GO:0005515;GO:0005524;GO:0005739;GO:0005829;GO:0005938;GO:0006006;GO:0006732;GO:0006753;GO:0007204;GO:0009593;GO:0009749;GO:0010565;GO:0010648;GO:0015980;GO:0016301;GO:0016310;GO:0016773;GO:0019932;GO:0023057;GO:0030141;GO:0031018;GO:0031327;GO:0031328;GO:0031331;GO:0032024;GO:0032787;GO:0032869;GO:0034645;GO:0042149;GO:0042327;GO:0042593;GO:0043234;GO:0043467;GO:0044262;GO:0044428;GO:0044430;GO:…	ATP binding;calcium ion import;cell cortex;cellular carbohydrate metabolic process;cellular macromolecule biosynthetic process;cellular response to glucose starvation;cellular response to insulin stimulus;coenzyme metabolic process;cytoskeletal part;cytosol;detection of chemical stimulus;endocrine pancreas development;energy derivation by oxidation of organic compounds;glucose homeostasis;glucose…
gene:ENSMUSG00000031144	chrX:7638470-7653256	Syp	4.84664	7.07296	7.27355	6.98838	8.07772	8.53761e-14	A;D	Positive	E15.5_Ngn3_Het;P1	GTPase and G-protein activity;Vesicle-mediated transport and secretion by cell	Adhesion, communication, aggregation and migration;Binding;Biological regulation and behavior;Cellular component organization or biogenesis;Environmental information processing, response to stimulus and signaling;Localization and transport;Membrane;System process	GO:0005496;GO:0006897;GO:0007268;GO:0008277;GO:0017075;GO:0019904;GO:0030054;GO:0030285;GO:0030672;GO:0032403;GO:0042734;GO:0042802;GO:0043178;GO:0043234;GO:0044306;GO:0048169;GO:0048786;GO:0060076;GO:0071310	alcohol binding;cell junction;cellular response to organic substance;endocytosis;excitatory synapse;identical protein binding;integral component of synaptic vesicle membrane;neuron projection terminus;presynaptic active zone;presynaptic membrane;protein complex;protein complex binding;protein domain specific binding;regulation of G-protein coupled receptor protein signaling pathway;regulation of …
gene:ENSMUSG00000028749	chr4:138750532-138757626	Pla2g2f	4.50863	5.20765	5.36719	5.7056	5.22075	8.67084e-14	A;D	Positive	E15.5_Ngn3_Het;P1	Calcium-mediated processing;GTPase and G-protein activity;Oxoacid metabolic process and Fatty acid activity	Binding;Biosynthesis and Catalytical activity;Cellular component organization or biogenesis;Environmental information processing, response to stimulus and signaling;Localization and transport;Metabolism;System process	GO:0005509;GO:0005576;GO:0006644;GO:0016787;GO:0044712;GO:1901575;path:mmu00592;path:mmu04014;path:mmu04270;path:mmu04972;REACT_112621	alpha-Linolenic acid metabolism - Mus musculus (mouse);calcium ion binding;extracellular region;hydrolase activity;Metabolism;organic substance catabolic process;Pancreatic secretion - Mus musculus (mouse);phospholipid metabolic process;Ras signaling pathway - Mus musculus (mouse);single-organism catabolic process;Vascular smooth muscle contraction - Mus musculus (mouse)
gene:ENSMUSG00000033717	chr19:54045181-54048982	Adra2a	4.28007	5.7893	5.83139	5.43275	5.74435	8.9373e-14	A;D;U	Positive	E15.5_Ngn3_Het;P1;P60	Glycolysis, Glucose processing, Pyruvate metabolism and TCA cycle;GTPase and G-protein activity;Insulin processing and signaling;Protein tyrosine and serine/threonine kinase activity;Vesicle-mediated transport and secretion by cell	Adhesion, communication, aggregation and migration;Binding;Biological regulation and behavior;Biosynthesis and Catalytical activity;Cellular component organization or biogenesis;Developmental process and reproduction;Environmental information processing, response to stimulus and signaling;Localization and transport;Membrane;Metabolism;System process	GO:0001775;GO:0004930;GO:0005737;GO:0005887;GO:0006937;GO:0006954;GO:0007193;GO:0007596;GO:0009719;GO:0009895;GO:0009967;GO:0010565;GO:0017157;GO:0019216;GO:0019229;GO:0019901;GO:0030334;GO:0031331;GO:0031690;GO:0032403;GO:0032844;GO:0033238;GO:0034645;GO:0042593;GO:0042803;GO:0043235;GO:0044238;GO:0044703;GO:0045202;GO:0045860;GO:0046483;GO:0046676;GO:0048585;GO:0050877;GO:0051241;GO:0071310;GO:…	adenylate cyclase-inhibiting G-protein coupled receptor signaling pathway;adrenergic receptor binding;blood coagulation;cell activation;cellular macromolecule biosynthetic process;cellular response to organic substance;cytoplasm;G-protein coupled receptor activity;glucose homeostasis;heterocycle metabolic process;inflammatory response;integral component of plasma membrane;multi-organism reproduct…
gene:ENSMUSG00000024027	chr17:30901866-30936510	Glp1r	4.85751	9.17033	10.0928	10.5079	10.0967	9.08162e-14	D	Positive	P1	GTPase and G-protein activity;Insulin processing and signaling;Ion transport and homeostasis	Biological regulation and behavior;Environmental information processing, response to stimulus and signaling;Localization and transport;Membrane;Metabolism;System process	GO:0004930;GO:0005886;GO:0006950;GO:0007204;GO:0007218;GO:0007611;GO:0008016;GO:0016021;GO:0019932;GO:0071375;path:mmu04080;path:mmu04911;REACT_105339;REACT_105810;REACT_109465;REACT_112621;REACT_115202;REACT_33090;REACT_88236	cellular response to peptide hormone stimulus;Class B/2 (Secretin family receptors);G-protein coupled receptor activity;G alpha (s) signalling events;Glucagon-type ligand receptors;Insulin secretion - Mus musculus (mouse);integral component of membrane;Integration of energy metabolism;learning or memory;Metabolism;Neuroactive ligand-receptor interaction - Mus musculus (mouse);neuropeptide signali…
gene:ENSMUSG00000017316	chr11:102099929-102101319	Ppy	8.92716	10.4497	11.55	11.5055	9.71363	9.22595e-14	A;D	Positive	E15.5_Ngn3_Het;P1	GTPase and G-protein activity	Binding;Cellular component organization or biogenesis;Environmental information processing, response to stimulus and signaling	GO:0005179;GO:0005576;REACT_115202;REACT_137560;REACT_32532;REACT_34241;REACT_77799;REACT_85878;REACT_90291	Class A/1 (Rhodopsin-like receptors);extracellular region;G alpha (i) signalling events;GPCR downstream signaling;GPCR ligand binding;hormone activity;Peptide ligand-binding receptors;Signal Transduction;Signaling by GPCR
gene:ENSMUSG00000040605	chr16:97356727-97439012	Bace2	0.402517	5.88532	6.91726	6.75243	7.01761	1.02141e-13	D	Positive	P1	Unclassified	Biosynthesis and Catalytical activity;Membrane;Metabolism;Organelle	GO:0003824;GO:0005794;GO:0008152;GO:0016021;GO:2000113	catalytic activity;Golgi apparatus;integral component of membrane;metabolic process;negative regulation of cellular macromolecule biosynthetic process
gene:ENSMUSG00000023473	chr9:108826319-108852963	Celsr3	6.10702	7.22902	7.07173	6.89524	6.44681	1.10356e-13	A;D	Positive	E15.5_Ngn3_Het;P1	Calcium-mediated processing;GTPase and G-protein activity	Adhesion, communication, aggregation and migration;Binding;Cellular component organization or biogenesis;Environmental information processing, response to stimulus and signaling;Localization and transport;Membrane	GO:0001764;GO:0004930;GO:0005509;GO:0005515;GO:0005886;GO:0007156;GO:0007218;GO:0007413;GO:0016021;GO:0032880;GO:0042384	axonal fasciculation;calcium ion binding;cilium assembly;G-protein coupled receptor activity;homophilic cell adhesion via plasma membrane adhesion molecules;integral component of membrane;neuron migration;neuropeptide signaling pathway;plasma membrane;protein binding;regulation of protein localization
gene:ENSMUSG00000034871	chr4:106733888-106748292	Fam151a	7.18433	10.4738	10.1154	10.2715	10.0207	1.11133e-13	D	Positive	P1	Unclassified	Membrane;Organelle	GO:0016021;GO:0070062	extracellular vesicular exosome;integral component of membrane
gene:ENSMUSG00000022619	chr15:89453912-89464468	Mapk8ip2	6.92274	8.48506	8.55168	8.45526	8.54325	1.16907e-13	A;D	Positive	E15.5_Ngn3_Het;P1	Ion transport and homeostasis;Membrane potential and Ion channels	Adhesion, communication, aggregation and migration;Binding;Biological regulation and behavior;Biosynthesis and Catalytical activity;Cellular component organization or biogenesis;Developmental process and reproduction;Environmental information processing, response to stimulus and signaling;Localization and transport;Membrane;System process	GO:0005737;GO:0007254;GO:0007612;GO:0008047;GO:0008092;GO:0014069;GO:0019887;GO:0019901;GO:0019953;GO:0032403;GO:0035176;GO:0043025;GO:0043234;GO:0045860;GO:0046328;GO:0048813;GO:0060079;GO:0070304;GO:2000310;path:mmu04010	cytoplasm;cytoskeletal protein binding;dendrite morphogenesis;enzyme activator activity;JNK cascade;learning;MAPK signaling pathway - Mus musculus (mouse);neuronal cell body;positive regulation of protein kinase activity;positive regulation of stress-activated protein kinase signaling cascade;postsynaptic density;protein complex;protein complex binding;protein kinase binding;protein kinase regula…
gene:ENSMUSG00000040118	chr5:15934690-16374511	Cacna2d1	4.9501	4.83961	4.69416	4.7096	4.22565	1.1946e-13	A;D	Positive	E15.5_Ngn3_Het;P1	Ion transport and homeostasis;Membrane potential and Ion channels	Binding;Cellular component organization or biogenesis;Localization and transport;Membrane	GO:0005515;GO:0005737;GO:0016021;GO:0022843;GO:0030315;GO:0034765;GO:0043234;GO:0044421;GO:0046872;GO:0046873;GO:0051179;GO:0051924	cytoplasm;extracellular region part;integral component of membrane;localization;metal ion binding;metal ion transmembrane transporter activity;protein binding;protein complex;regulation of calcium ion transport;regulation of ion transmembrane transport;T-tubule;voltage-gated cation channel activity
gene:ENSMUSG00000027690	chr3:28697902-28728356	Slc2a2	1.57649	4.90104	4.41773	4.12573	4.09234	1.30673e-13	D	Positive	P1	Glycolysis, Glucose processing, Pyruvate metabolism and TCA cycle;Insulin processing and signaling;Ion transport and homeostasis	Cellular component organization or biogenesis;Developmental process and reproduction;Localization and transport;Membrane;Metabolism	GO:0005737;GO:0005886;GO:0006820;GO:0015758;GO:0016021;GO:0022857;GO:0031018;GO:0042995;GO:0055085;REACT_102834;REACT_105810;REACT_112621;REACT_88236	anion transport;cell projection;cytoplasm;endocrine pancreas development;glucose transport;integral component of membrane;Integration of energy metabolism;Metabolism;Metabolism of carbohydrates;plasma membrane;Regulation of Insulin Secretion;transmembrane transport;transmembrane transporter activity
gene:ENSMUSG00000033061	chr1:75272198-75278415	Resp18	7.17975	8.94173	9.83832	10.6958	12.2538	1.37335e-13	D;U	Positive	P1;P60	Vesicle-mediated transport and secretion by cell	Cellular component organization or biogenesis;Organelle;System process	GO:0005576;GO:0005794;GO:0030141;GO:0043204;GO:0044432;GO:0044699;GO:0070013	endoplasmic reticulum part;extracellular region;Golgi apparatus;intracellular organelle lumen;perikaryon;secretory granule;single-organism process
gene:ENSMUSG00000034656	chr8:84388439-84640246	Cacna1a	4.91754	4.90366	4.92749	4.34214	4.29099	1.4444e-13	A;D	Positive	E15.5_Ngn3_Het;P1	Glycolysis, Glucose processing, Pyruvate metabolism and TCA cycle;GTPase and G-protein activity;Insulin processing and signaling;Ion transport and homeostasis;Membrane potential and Ion channels;Vesicle-mediated transport and secretion by cell	Adhesion, communication, aggregation and migration;Binding;Biological regulation and behavior;Biosynthesis and Catalytical activity;Cell cycle, proliferation, growth and death;Cellular component organization or biogenesis;Developmental process and reproduction;Disease;Environmental information processing, response to stimulus and signaling;Genetic Information process;Localization and transport;Me…	GO:0000904;GO:0003677;GO:0005515;GO:0005634;GO:0005737;GO:0006006;GO:0006790;GO:0007186;GO:0007416;GO:0007628;GO:0008219;GO:0010975;GO:0016021;GO:0016358;GO:0017156;GO:0021515;GO:0021517;GO:0021549;GO:0022843;GO:0030425;GO:0031327;GO:0034613;GO:0034765;GO:0043025;GO:0043066;GO:0043234;GO:0043523;GO:0044459;GO:0046872;GO:0046873;GO:0048265;GO:0048646;GO:0048858;GO:0051952;GO:0060004;GO:0070509;GO:…	adult walking behavior;anatomical structure formation involved in morphogenesis;calcium ion-dependent exocytosis;calcium ion import;cell death;cell differentiation in spinal cord;cell morphogenesis involved in differentiation;cell projection morphogenesis;cellular protein localization;cerebellum development;Cholinergic synapse - Mus musculus (mouse);cytoplasm;dendrite;dendrite development;DNA bin…
gene:ENSMUSG00000062444	chr7:81460398-81493925	Ap3b2	6.27403	7.65807	8.01209	7.91432	8.18295	1.52101e-13	A;D;U	Positive	E15.5_Ngn3_Het;P1;P60	Vesicle-mediated transport and secretion by cell	Adhesion, communication, aggregation and migration;Cellular component organization or biogenesis;Genetic Information process;Localization and transport;Membrane;Organelle	GO:0005634;GO:0005802;GO:0006886;GO:0008089;GO:0030659;GO:0043234;GO:0048489;GO:0098588;path:mmu04142	anterograde axon cargo transport;bounding membrane of organelle;cytoplasmic vesicle membrane;intracellular protein transport;Lysosome - Mus musculus (mouse);nucleus;protein complex;synaptic vesicle transport;trans-Golgi network
gene:ENSMUSG00000033740	chr1:6487230-6860940	St18	6.50675	7.04876	6.75488	6.72658	6.44656	1.56541e-13	A	Positive	E15.5_Ngn3_Het	Unclassified	Binding;Biosynthesis and Catalytical activity;Genetic Information process	GO:0003677;GO:0003700;GO:0005634;GO:0006351;GO:0008270;GO:0010468;GO:1903506;GO:2000112	DNA binding;nucleus;regulation of cellular macromolecule biosynthetic process;regulation of gene expression;regulation of nucleic acid-templated transcription;sequence-specific DNA binding transcription factor activity;transcription, DNA-templated;zinc ion binding
gene:ENSMUSG00000044933	chr15:78537014-78544345	Sstr3	5.68049	8.74221	8.5114	8.76871	9.38105	1.56764e-13	D;U	Positive	P1;P60	GTPase and G-protein activity	Binding;Cellular component organization or biogenesis;Developmental process and reproduction;Environmental information processing, response to stimulus and signaling;Membrane	GO:0005515;GO:0005737;GO:0007186;GO:0008188;GO:0009755;GO:0016021;GO:0019953;GO:0021549;GO:0030900;GO:0031253;GO:0042594;GO:0043627;GO:0044441;GO:0048609;GO:0051384;GO:0071375;GO:0071396;GO:0097306;GO:0098588;GO:0098589;path:mmu04080;REACT_115202;REACT_137560;REACT_32532;REACT_34241;REACT_77799;REACT_85878;REACT_90291	bounding membrane of organelle;cell projection membrane;cellular response to alcohol;cellular response to lipid;cellular response to peptide hormone stimulus;cerebellum development;ciliary part;Class A/1 (Rhodopsin-like receptors);cytoplasm;forebrain development;G-protein coupled receptor signaling pathway;G alpha (i) signalling events;GPCR downstream signaling;GPCR ligand binding;hormone-mediate…
gene:ENSMUSG00000042258	chr13:116298280-116309688	Isl1	8.27032	7.22333	7.23463	6.97023	7.05093	1.57763e-13	A	Positive	E15.5_Ngn3_Het	Insulin processing and signaling;Vesicle-mediated transport and secretion by cell	Adhesion, communication, aggregation and migration;Binding;Cell cycle, proliferation, growth and death;Developmental process and reproduction;Environmental information processing, response to stimulus and signaling;Genetic Information process;Localization and transport;Metabolism	GO:0000976;GO:0001932;GO:0003682;GO:0003700;GO:0003713;GO:0005634;GO:0006357;GO:0007389;GO:0007411;GO:0007507;GO:0008134;GO:0008270;GO:0009611;GO:0010628;GO:0010648;GO:0014706;GO:0021520;GO:0023057;GO:0030900;GO:0043009;GO:0043523;GO:0045892;GO:0046887;GO:0048585;GO:0048646;GO:0048732;GO:0050714;GO:0050796;GO:0051099;GO:0051427;GO:0051960;GO:1902680;GO:2000027	anatomical structure formation involved in morphogenesis;axon guidance;chordate embryonic development;chromatin binding;forebrain development;gland development;heart development;hormone receptor binding;negative regulation of cell communication;negative regulation of response to stimulus;negative regulation of signaling;negative regulation of transcription, DNA-templated;nucleus;pattern specifica…
gene:ENSMUSG00000031284	chrX:143518590-143797796	Pak3	3.79583	4.20143	4.61898	4.09716	2.9782	1.662e-13	A;D;O	Positive	E15.5_Ngn3_Het;P1;P12	Protein tyrosine and serine/threonine kinase activity	Binding;Biological regulation and behavior;Biosynthesis and Catalytical activity;Cell cycle, proliferation, growth and death;Cellular component organization or biogenesis;Developmental process and reproduction;Environmental information processing, response to stimulus and signaling;Genetic Information process;Localization and transport;Metabolism;Organelle	GO:0004713;GO:0006464;GO:0009967;GO:0010557;GO:0012505;GO:0016358;GO:0019904;GO:0031328;GO:0031344;GO:0032270;GO:0032271;GO:0032550;GO:0032559;GO:0035556;GO:0035639;GO:0042327;GO:0043231;GO:0043523;GO:0044444;GO:0044710;GO:0045935;GO:0050767;GO:0065008;GO:2000112	adenyl ribonucleotide binding;cellular protein modification process;cytoplasmic part;dendrite development;endomembrane system;intracellular membrane-bounded organelle;intracellular signal transduction;positive regulation of cellular biosynthetic process;positive regulation of cellular protein metabolic process;positive regulation of macromolecule biosynthetic process;positive regulation of nucleo…
gene:ENSMUSG00000032186	chr9:75565620-75611325	Tmod2	3.34831	6.34374	6.42343	5.97962	6.67634	1.87628e-13	D	Positive	P1	GTPase and G-protein activity	Adhesion, communication, aggregation and migration;Binding;Cellular component organization or biogenesis;Environmental information processing, response to stimulus and signaling;System process	GO:0003779;GO:0005523;GO:0005737;GO:0005856;GO:0007270;GO:0007611;GO:0008277;GO:0009967;GO:0030426	actin binding;cytoplasm;cytoskeleton;growth cone;learning or memory;neuron-neuron synaptic transmission;positive regulation of signal transduction;regulation of G-protein coupled receptor protein signaling pathway;tropomyosin binding
gene:ENSMUSG00000031111	chrX:49782535-49797749	Igsf1	1.96404	5.6686	5.19083	4.26698	3.11352	2.18381e-13	D	Positive	P1	Unclassified	Membrane	GO:0016021	integral component of membrane
gene:ENSMUSG00000036402	chr6:66896396-67021350	Gng12	2.68397	4.15805	3.98714	3.85149	3.80405	2.20157e-13	A;D	Positive	E15.5_Ngn3_Het;P1	GTPase and G-protein activity;Insulin processing and signaling;Membrane potential and Ion channels	Adhesion, communication, aggregation and migration;Binding;Biological regulation and behavior;Biosynthesis and Catalytical activity;Cellular component organization or biogenesis;Developmental process and reproduction;Environmental information processing, response to stimulus and signaling;Localization and transport;Membrane;Metabolism;Organelle;System process	GO:0004871;GO:0005834;GO:0005884;GO:0007186;GO:0021987;GO:0030165;GO:0032496;GO:0043168;GO:0070062;path:mmu04010;path:mmu04014;path:mmu04062;path:mmu04151;path:mmu04713;path:mmu04723;path:mmu04724;path:mmu04725;path:mmu04726;path:mmu04727;path:mmu04728;path:mmu05032;path:mmu05034;REACT_104910;REACT_105339;REACT_105810;REACT_106459;REACT_108208;REACT_109210;REACT_112621;REACT_115202;REACT_136556;R…	actin filament;Activation of G protein gated Potassium channels;Activation of GABAB receptors;Alcoholism - Mus musculus (mouse);anion binding;Aquaporin-mediated transport;cerebral cortex development;Chemokine signaling pathway - Mus musculus (mouse);Cholinergic synapse - Mus musculus (mouse);Circadian entrainment - Mus musculus (mouse);Class B/2 (Secretin family receptors);Dopaminergic synapse - …
gene:ENSMUSG00000071234	chr12:84677277-84698807	Syndig1l	7.1328	10.3482	10.5202	10.5006	11.3718	2.63012e-13	D	Positive	P1	Unclassified	Membrane;Organelle	GO:0005794;GO:0016021	Golgi apparatus;integral component of membrane
gene:ENSMUSG00000046844	chr8:114205611-114374071	Vat1l	7.44278	8.3736	8.20787	7.7308	6.85145	2.65565e-13	A	Positive	E15.5_Ngn3_Het	Unclassified	Binding;Biosynthesis and Catalytical activity;Metabolism	GO:0008270;GO:0016740;GO:0044710	single-organism metabolic process;transferase activity;zinc ion binding
gene:ENSMUSG00000044988	chr13:3940687-3945349	Ucn3	4.74625	9.16372	10.304	12.3403	12.5035	2.74336e-13	D;P;U	Positive	P1;P12;P60	Glycolysis, Glucose processing, Pyruvate metabolism and TCA cycle;GTPase and G-protein activity;Membrane potential and Ion channels;Oxidation-reduction and Oxygen-mediated activity;Vesicle-mediated transport and secretion by cell	Binding;Cellular component organization or biogenesis;Environmental information processing, response to stimulus and signaling;Localization and transport;Membrane;System process	GO:0001664;GO:0005615;GO:0007186;GO:0009749;GO:0023051;GO:0033267;GO:0042594;GO:0045838;GO:0048545;GO:0071456;GO:1903530	axon part;cellular response to hypoxia;extracellular space;G-protein coupled receptor binding;G-protein coupled receptor signaling pathway;positive regulation of membrane potential;regulation of secretion by cell;regulation of signaling;response to glucose;response to starvation;response to steroid hormone
gene:ENSMUSG00000027273	chr2:136713452-136782428	Snap25	5.40145	7.4982	7.83955	7.8931	8.12308	2.87215e-13	D;U	Positive	P1;P60	Insulin processing and signaling;Vesicle-mediated transport and secretion by cell	Adhesion, communication, aggregation and migration;Binding;Biological regulation and behavior;Cellular component organization or biogenesis;Developmental process and reproduction;Environmental information processing, response to stimulus and signaling;Localization and transport;Membrane;Organelle;System process	GO:0005802;GO:0005829;GO:0005886;GO:0007269;GO:0007399;GO:0016192;GO:0017075;GO:0030054;GO:0030154;GO:0031201;GO:0044295;GO:0045202;GO:0048471;GO:0060291;path:mmu04721;path:mmu04911;REACT_106459;REACT_144401;REACT_29928;REACT_30788;REACT_86563;REACT_88692;REACT_98298	Acetylcholine Neurotransmitter Release Cycle;axonal growth cone;cell differentiation;cell junction;cytosol;GABA synthesis, release, reuptake and degradation;Glutamate Neurotransmitter Release Cycle;Insulin secretion - Mus musculus (mouse);long-term synaptic potentiation;nervous system development;Neuronal System;Neurotransmitter Release Cycle;neurotransmitter secretion;Norepinephrine Neurotransmi…
gene:ENSMUSG00000040147	chrX:16709281-16817366	Maob	2.38283	4.67451	4.28083	4.54619	4.55184	3.17857e-13	D;U	Positive	P1;P60	Ion transport and homeostasis;Oxidation-reduction and Oxygen-mediated activity;Vesicle-mediated transport and secretion by cell	Adhesion, communication, aggregation and migration;Binding;Biosynthesis and Catalytical activity;Developmental process and reproduction;Environmental information processing, response to stimulus and signaling;Localization and transport;Membrane;Metabolism;Organelle	GO:0005741;GO:0009636;GO:0010038;GO:0016021;GO:0016491;GO:0031325;GO:0032496;GO:0033238;GO:0042803;GO:0043271;GO:0044070;GO:0045471;GO:0048513;GO:0048857;GO:0050660;GO:0051384;GO:0055114;GO:0060322;GO:0070062;GO:1903530;path:mmu04726;path:mmu04728;path:mmu05030;path:mmu05031;path:mmu05034;REACT_112621	Alcoholism - Mus musculus (mouse);Amphetamine addiction - Mus musculus (mouse);Cocaine addiction - Mus musculus (mouse);Dopaminergic synapse - Mus musculus (mouse);extracellular vesicular exosome;flavin adenine dinucleotide binding;head development;integral component of membrane;Metabolism;mitochondrial outer membrane;negative regulation of ion transport;neural nucleus development;organ developme…
gene:ENSMUSG00000027520	chr1:63273264-63314576	Zdbf2	4.91244	4.89105	4.1208	3.74586	1.7781	3.72036e-13	A	Positive	E15.5_Ngn3_Het			Singleton	Singleton
gene:ENSMUSG00000015944	chr5:134099710-134144343	Gatsl2	3.67202	4.21614	3.31621	3.39264	2.78555	3.85136e-13	D	Positive	P1			Singleton	Singleton
gene:ENSMUSG00000039372	chr1:72427111-72536930	March4	7.8832	9.23456	9.54184	9.45441	9.26874	3.96905e-13	A;D;U	Positive	E15.5_Ngn3_Het;P1;P60	Vesicle-mediated transport and secretion by cell	Binding;Biosynthesis and Catalytical activity;Membrane;Metabolism;Organelle	GO:0000139;GO:0005795;GO:0005802;GO:0008270;GO:0016021;GO:0016740;GO:0032446	Golgi membrane;Golgi stack;integral component of membrane;protein modification by small protein conjugation;trans-Golgi network;transferase activity;zinc ion binding
gene:ENSMUSG00000052105	chr17:66336981-66449750	Soga2	3.35904	5.22645	4.98791	4.71587	3.78874	4.00679e-13	A;D	Positive	E15.5_Ngn3_Het;P1	Unclassified	Binding;Biological regulation and behavior;Biosynthesis and Catalytical activity;Cell cycle, proliferation, growth and death;Cellular component organization or biogenesis;Genetic Information process;Localization and transport;Membrane;Metabolism	GO:0000226;GO:0003723;GO:0005737;GO:0005819;GO:0007163;GO:0008017;GO:0010506;GO:0016324;GO:0030496;GO:0032386;GO:0032880;GO:0042803;GO:0048522;GO:0051345	apical plasma membrane;cytoplasm;establishment or maintenance of cell polarity;microtubule binding;microtubule cytoskeleton organization;midbody;positive regulation of cellular process;positive regulation of hydrolase activity;protein homodimerization activity;regulation of autophagy;regulation of intracellular transport;regulation of protein localization;RNA binding;spindle
gene:ENSMUSG00000041592	chr11:113776373-114067046	Sdk2	2.46461	5.57207	6.24796	6.17788	5.26917	4.34874e-13	D;U	Positive	P1;P60	Unclassified	Binding;Membrane	GO:0005515;GO:0016021	integral component of membrane;protein binding
gene:ENSMUSG00000034111	chr12:87166241-87200229	Tmed8	3.21771	3.94367	3.81816	3.69374	2.55382	4.55969e-13	D	Positive	P1	Unclassified	Membrane	GO:0016021	integral component of membrane
gene:ENSMUSG00000006930	chr11:100347326-100356128	Hap1	3.31926	3.47755	4.09546	3.28182	3.70403	4.56968e-13	A;D	Positive	E15.5_Ngn3_Het;P1	Unclassified	Adhesion, communication, aggregation and migration;Cellular component organization or biogenesis;Localization and transport	GO:0005737;GO:0007018;GO:0051640;GO:1902580;GO:1902582;path:mmu04727	cytoplasm;GABAergic synapse - Mus musculus (mouse);microtubule-based movement;organelle localization;single-organism cellular localization;single-organism intracellular transport
gene:ENSMUSG00000040181	chr1:162829560-162866548	Fmo1	2.15562	4.86619	4.72051	6.46107	7.54694	4.57301e-13	U	Positive	P60	Oxidation-reduction and Oxygen-mediated activity	Environmental information processing, response to stimulus and signaling;Membrane;Metabolism;Organelle	GO:0002237;GO:0005783;GO:0016021;GO:0055114;GO:0098588;path:mmu00982	bounding membrane of organelle;Drug metabolism - cytochrome P450 - Mus musculus (mouse);endoplasmic reticulum;integral component of membrane;oxidation-reduction process;response to molecule of bacterial origin
gene:ENSMUSG00000036395	chr9:26763043-26806468	Glb1l2	4.28339	5.82877	5.8011	4.93473	4.54348	4.70401e-13	A;D	Positive	E15.5_Ngn3_Het;P1	Unclassified	Biosynthesis and Catalytical activity;Cellular component organization or biogenesis;Metabolism	GO:0005576;GO:0005975;GO:0016787;GO:0043234	carbohydrate metabolic process;extracellular region;hydrolase activity;protein complex
gene:ENSMUSG00000006575	chr11:102393402-102402555	Rundc3a	4.37557	5.70511	5.732	5.62369	5.79085	5.03819e-13	A;D	Positive	E15.5_Ngn3_Het;P1	Unclassified	Binding;Biosynthesis and Catalytical activity;Cellular component organization or biogenesis;Genetic Information process;Membrane	GO:0005829;GO:0005886;GO:0008047;GO:0031328;GO:0043085;GO:0045935;GO:0051427	cytosol;enzyme activator activity;hormone receptor binding;plasma membrane;positive regulation of catalytic activity;positive regulation of cellular biosynthetic process;positive regulation of nucleobase-containing compound metabolic process
gene:ENSMUSG00000031428	chrX:136993154-136998472	Zcchc18	6.64944	6.17012	6.12711	6.27627	6.12019	6.2339e-13	A	Positive	E15.5_Ngn3_Het	Unclassified	Binding;Environmental information processing, response to stimulus and signaling;Genetic Information process;Organelle	GO:0003713;GO:0006357;GO:0007165;GO:0008270;GO:0044428;GO:0070013	intracellular organelle lumen;nuclear part;regulation of transcription from RNA polymerase II promoter;signal transduction;transcription coactivator activity;zinc ion binding
gene:ENSMUSG00000048218	chr15:97244073-97247287	Amigo2	4.56069	6.77105	6.30529	5.98918	5.61703	7.09655e-13	D	Positive	P1	Unclassified	Adhesion, communication, aggregation and migration;Binding;Cell cycle, proliferation, growth and death;Genetic Information process;Membrane	GO:0005515;GO:0005634;GO:0005886;GO:0007156;GO:0007157;GO:0016021;GO:0042981;GO:0043069	heterophilic cell-cell adhesion via plasma membrane cell adhesion molecules;homophilic cell adhesion via plasma membrane adhesion molecules;integral component of membrane;negative regulation of programmed cell death;nucleus;plasma membrane;protein binding;regulation of apoptotic process
gene:ENSMUSG00000015568	chr8:68880490-68907448	Lpl	2.07992	5.76406	4.71359	5.26681	3.2411	7.43183e-13	D	Positive	P1	Unclassified	Biological regulation and behavior;Cellular component organization or biogenesis;Environmental information processing, response to stimulus and signaling;Organelle	GO:0009628;GO:0009986;GO:0032991;GO:0048518;GO:0070062	cell surface;extracellular vesicular exosome;macromolecular complex;positive regulation of biological process;response to abiotic stimulus
gene:ENSMUSG00000057530	chr4:137862236-137965229	Ece1	2.35251	4.3566	3.95424	3.83265	3.08262	7.98361e-13	D	Positive	P1	Unclassified	Binding;Biological regulation and behavior;Biosynthesis and Catalytical activity;Cellular component organization or biogenesis;Developmental process and reproduction;Environmental information processing, response to stimulus and signaling;Membrane;Metabolism;Organelle;System process	GO:0005764;GO:0005768;GO:0005886;GO:0007507;GO:0008217;GO:0008237;GO:0016021;GO:0016486;GO:0023056;GO:0042803;GO:0044248;GO:0046872;GO:0048471;GO:0048522;GO:0048598;GO:0051246;GO:0070062;GO:0098552;GO:0098588	bounding membrane of organelle;cellular catabolic process;embryonic morphogenesis;endosome;extracellular vesicular exosome;heart development;integral component of membrane;lysosome;metal ion binding;metallopeptidase activity;peptide hormone processing;perinuclear region of cytoplasm;plasma membrane;positive regulation of cellular process;positive regulation of signaling;protein homodimerization a…
gene:ENSMUSG00000020732	chr11:115091430-115162236	Rab37	4.90014	7.18754	7.15235	7.18529	5.7038	8.76965e-13	A;D	Positive	E15.5_Ngn3_Het;P1	GTPase and G-protein activity;Vesicle-mediated transport and secretion by cell	Binding;Biosynthesis and Catalytical activity;Environmental information processing, response to stimulus and signaling;Genetic Information process;Localization and transport;Organelle	GO:0003924;GO:0005515;GO:0005634;GO:0006886;GO:0006913;GO:0007264;GO:0030141;GO:0032550;GO:0032561;GO:0035639	GTPase activity;guanyl ribonucleotide binding;intracellular protein transport;nucleocytoplasmic transport;nucleus;protein binding;purine ribonucleoside binding;purine ribonucleoside triphosphate binding;secretory granule;small GTPase mediated signal transduction
gene:ENSMUSG00000038855	chr1:180330484-180424802	Itpkb	1.09726	4.12834	4.08463	3.98024	3.70367	9.15268e-13	D;U	Positive	P1;P60	Calcium-mediated processing;GTPase and G-protein activity	Adhesion, communication, aggregation and migration;Binding;Biological regulation and behavior;Biosynthesis and Catalytical activity;Developmental process and reproduction;Environmental information processing, response to stimulus and signaling;Immune system;Metabolism	GO:0002521;GO:0002682;GO:0005515;GO:0005524;GO:0007166;GO:0016301;GO:0016310;GO:0016773;GO:0035556;GO:0042110;GO:0044710;GO:0045595;GO:0045785;GO:0046578;GO:0050865;GO:0051094;GO:0051240;GO:1902533;GO:2000026;path:mmu00562;path:mmu04020;path:mmu04070;REACT_112621	ATP binding;Calcium signaling pathway - Mus musculus (mouse);cell surface receptor signaling pathway;Inositol phosphate metabolism - Mus musculus (mouse);intracellular signal transduction;kinase activity;leukocyte differentiation;Metabolism;Phosphatidylinositol signaling system - Mus musculus (mouse);phosphorylation;phosphotransferase activity, alcohol group as acceptor;positive regulation of cel…
gene:ENSMUSG00000037580	chr14:47153894-47189413	Gch1	3.12103	3.96336	4.10459	4.00489	3.82107	9.43246e-13	A;D	Positive	E15.5_Ngn3_Het;P1	Calcium-mediated processing;Oxoacid metabolic process and Fatty acid activity	Binding;Biosynthesis and Catalytical activity;Cellular component organization or biogenesis;Environmental information processing, response to stimulus and signaling;Immune system;Membrane;Metabolism;Organelle;System process	GO:0005509;GO:0005829;GO:0006732;GO:0008217;GO:0008270;GO:0016787;GO:0031410;GO:0031965;GO:0032496;GO:0032550;GO:0032561;GO:0034097;GO:0035639;GO:0042311;GO:0042417;GO:0042423;GO:0042803;GO:0043085;GO:0043234;GO:0043603;GO:0044283;GO:0045087;GO:0046483;GO:0048265;GO:0050662;GO:0050877;GO:0051260;GO:0090407;GO:1901605;REACT_112621	alpha-amino acid metabolic process;calcium ion binding;catecholamine biosynthetic process;cellular amide metabolic process;coenzyme binding;coenzyme metabolic process;cytoplasmic vesicle;cytosol;dopamine metabolic process;guanyl ribonucleotide binding;heterocycle metabolic process;hydrolase activity;innate immune response;Metabolism;neurological system process;nuclear membrane;organophosphate bio…
gene:ENSMUSG00000055254	chr13:58806595-59133970	Ntrk2	2.3032	5.12064	5.82869	6.27544	6.98668	9.62563e-13	D;U	Positive	P1;P60	GTPase and G-protein activity;Protein tyrosine and serine/threonine kinase activity;Vesicle-mediated transport and secretion by cell	Adhesion, communication, aggregation and migration;Binding;Biological regulation and behavior;Biosynthesis and Catalytical activity;Cell cycle, proliferation, growth and death;Cellular component organization or biogenesis;Developmental process and reproduction;Environmental information processing, response to stimulus and signaling;Localization and transport;Membrane;Metabolism;Organelle;System p…	GO:0004713;GO:0004888;GO:0005102;GO:0005783;GO:0005829;GO:0005887;GO:0006468;GO:0006952;GO:0007169;GO:0007612;GO:0007613;GO:0007623;GO:0009416;GO:0009612;GO:0009986;GO:0010769;GO:0010976;GO:0018193;GO:0019932;GO:0030182;GO:0030426;GO:0030900;GO:0031325;GO:0032550;GO:0032559;GO:0032940;GO:0035639;GO:0042803;GO:0043025;GO:0043195;GO:0043197;GO:0043234;GO:0043524;GO:0044440;GO:0045211;GO:0046578;GO:…	adenyl ribonucleotide binding;Alcoholism - Mus musculus (mouse);bounding membrane of organelle;cardiovascular system development;cell surface;cellular response to organic substance;circadian rhythm;cytosol;defense response;dendritic spine;endoplasmic reticulum;endosomal part;excitatory synapse;forebrain development;growth cone;integral component of plasma membrane;learning;long-term synaptic pote…
gene:ENSMUSG00000041923	chr18:22693180-23041653	Nol4	6.01789	7.01867	6.65996	6.65766	6.94998	9.70113e-13	A	Positive	E15.5_Ngn3_Het	Unclassified	Genetic Information process	GO:0005730	nucleolus
gene:ENSMUSG00000056004	chr5:9266117-9481825	9330182L06Rik	3.83621	7.10063	6.75572	6.02571	6.33356	9.73999e-13	D	Positive	P1	Unclassified	Membrane	GO:0016021	integral component of membrane
gene:ENSMUSG00000026347	chr1:127486545-127678096	Tmem163	6.27626	7.95581	7.99091	7.5924	7.02977	9.89764e-13	A;D	Positive	E15.5_Ngn3_Het;P1	Unclassified	Adhesion, communication, aggregation and migration;Binding;Membrane	GO:0008270;GO:0030054;GO:0030285;GO:0031901	cell junction;early endosome membrane;integral component of synaptic vesicle membrane;zinc ion binding
gene:ENSMUSG00000026335	chr1:97795113-98095646	Pam	3.29738	3.30858	3.40831	3.22609	3.36233	1.06337e-12	A;D;U	Positive	E15.5_Ngn3_Het;P1;P60	Calcium-mediated processing;Oxidation-reduction and Oxygen-mediated activity;Oxoacid metabolic process and Fatty acid activity;Vesicle-mediated transport and secretion by cell	Binding;Biological regulation and behavior;Biosynthesis and Catalytical activity;Cellular component organization or biogenesis;Developmental process and reproduction;Environmental information processing, response to stimulus and signaling;Genetic Information process;Localization and transport;Membrane;Metabolism;Organelle;System process	GO:0001666;GO:0004497;GO:0005509;GO:0005794;GO:0005829;GO:0006357;GO:0007399;GO:0007507;GO:0007595;GO:0008270;GO:0009986;GO:0010038;GO:0016021;GO:0019842;GO:0019901;GO:0030658;GO:0032355;GO:0032787;GO:0032880;GO:0042493;GO:0043005;GO:0043168;GO:0043204;GO:0043603;GO:0044267;GO:0044421;GO:0044459;GO:0044702;GO:0048471;GO:0048511;GO:0051260;GO:1901564;GO:1903530	anion binding;calcium ion binding;cell surface;cellular amide metabolic process;cellular protein metabolic process;cytosol;extracellular region part;Golgi apparatus;heart development;integral component of membrane;lactation;monocarboxylic acid metabolic process;monooxygenase activity;nervous system development;neuron projection;organonitrogen compound metabolic process;perikaryon;perinuclear regi…
gene:ENSMUSG00000030406	chr7:19157124-19166127	Gipr	5.98372	7.34201	7.66426	7.52891	6.93899	1.16918e-12	A;D	Positive	E15.5_Ngn3_Het;P1	Calcium-mediated processing;Glycolysis, Glucose processing, Pyruvate metabolism and TCA cycle;GTPase and G-protein activity;Insulin processing and signaling;Ion transport and homeostasis;Oxoacid metabolic process and Fatty acid activity	Binding;Biological regulation and behavior;Biosynthesis and Catalytical activity;Developmental process and reproduction;Environmental information processing, response to stimulus and signaling;Genetic Information process;Localization and transport;Membrane	GO:0004930;GO:0005886;GO:0007204;GO:0007218;GO:0009611;GO:0009749;GO:0016021;GO:0017046;GO:0030817;GO:0031018;GO:0031328;GO:0032024;GO:0045744;GO:0045935;GO:0051592;GO:0070542;path:mmu04080;REACT_105339;REACT_109465;REACT_115202;REACT_33090;REACT_34241;REACT_77799;REACT_85878	Class B/2 (Secretin family receptors);endocrine pancreas development;G-protein coupled receptor activity;G alpha (s) signalling events;Glucagon-type ligand receptors;GPCR downstream signaling;GPCR ligand binding;integral component of membrane;negative regulation of G-protein coupled receptor protein signaling pathway;Neuroactive ligand-receptor interaction - Mus musculus (mouse);neuropeptide sign…
gene:ENSMUSG00000026131	chr1:33908224-34308652	Dst	2.68973	3.83784	3.49048	3.42749	3.20428	1.2278e-12	A;D	Positive	E15.5_Ngn3_Het;P1	Calcium-mediated processing	Adhesion, communication, aggregation and migration;Binding;Cell cycle, proliferation, growth and death;Cellular component organization or biogenesis;Developmental process and reproduction;Environmental information processing, response to stimulus and signaling;Genetic Information process;Localization and transport;Organelle	GO:0000226;GO:0003779;GO:0005102;GO:0005509;GO:0005634;GO:0005874;GO:0007018;GO:0007050;GO:0007163;GO:0007409;GO:0008017;GO:0008022;GO:0009611;GO:0030054;GO:0031110;GO:0031252;GO:0031410;GO:0042803;GO:0043933;GO:0050839;GO:0051704;GO:1902582	actin binding;axonogenesis;calcium ion binding;cell adhesion molecule binding;cell cycle arrest;cell junction;cell leading edge;cytoplasmic vesicle;establishment or maintenance of cell polarity;macromolecular complex subunit organization;microtubule;microtubule-based movement;microtubule binding;microtubule cytoskeleton organization;multi-organism process;nucleus;protein C-terminus binding;protei…
gene:ENSMUSG00000075316	chr2:66480079-66634952	Scn9a	4.74372	7.41518	7.81392	7.55015	8.62601	1.27931e-12	D	Positive	P1	Ion transport and homeostasis;Membrane potential and Ion channels	Binding;Environmental information processing, response to stimulus and signaling;Localization and transport;Membrane;System process	GO:0005248;GO:0005515;GO:0005887;GO:0006954;GO:0009636;GO:0019228;GO:0031420;GO:0034706;GO:0034765;GO:0035725;GO:0048265;GO:0086010	alkali metal ion binding;inflammatory response;integral component of plasma membrane;membrane depolarization during action potential;neuronal action potential;protein binding;regulation of ion transmembrane transport;response to pain;response to toxic substance;sodium channel complex;sodium ion transmembrane transport;voltage-gated sodium channel activity
gene:ENSMUSG00000044453	chr7:30860567-30861470	Ffar1	6.80563	10.0075	10.0691	9.87124	9.18569	1.28286e-12	D	Positive	P1	Glycolysis, Glucose processing, Pyruvate metabolism and TCA cycle;GTPase and G-protein activity;Insulin processing and signaling;Protein tyrosine and serine/threonine kinase activity	Binding;Biological regulation and behavior;Environmental information processing, response to stimulus and signaling;Localization and transport;Membrane;Metabolism	GO:0004930;GO:0005886;GO:0007186;GO:0008289;GO:0016021;GO:0030073;GO:0042593;path:mmu04911;REACT_105810;REACT_112621;REACT_115202;REACT_133090;REACT_31167;REACT_32532;REACT_34241;REACT_77799;REACT_85878;REACT_88236	Class A/1 (Rhodopsin-like receptors);G-protein coupled receptor activity;G-protein coupled receptor signaling pathway;G alpha (q) signalling events;Gastrin-CREB signalling pathway via PKC and MAPK;glucose homeostasis;GPCR downstream signaling;GPCR ligand binding;insulin secretion;Insulin secretion - Mus musculus (mouse);integral component of membrane;Integration of energy metabolism;lipid binding…
gene:ENSMUSG00000029878	chr12:74297473-74300468	Dbpht2	9.43235	8.56092	8.24348	7.4338	5.42552	1.37435e-12	A	Positive	E15.5_Ngn3_Het			Singleton	Singleton
gene:ENSMUSG00000047591	chr15:75746842-75747922	Mafa	3.19376	5.56836	6.00831	6.71839	7.30862	1.42275e-12	D;U	Positive	P1;P60	Glycolysis, Glucose processing, Pyruvate metabolism and TCA cycle;Insulin processing and signaling;Vesicle-mediated transport and secretion by cell	Disease;Environmental information processing, response to stimulus and signaling;Genetic Information process;Localization and transport	GO:0003700;GO:0005634;GO:0006351;GO:0009749;GO:0015031;GO:0015833;GO:0019932;GO:0043565;GO:0045893;GO:0046879;path:mmu04930;path:mmu04950	hormone secretion;Maturity onset diabetes of the young - Mus musculus (mouse);nucleus;peptide transport;positive regulation of transcription, DNA-templated;protein transport;response to glucose;second-messenger-mediated signaling;sequence-specific DNA binding;sequence-specific DNA binding transcription factor activity;transcription, DNA-templated;Type II diabetes mellitus - Mus musculus (mouse)
gene:ENSMUSG00000022180	chr14:54722215-54781886	Slc7a8	1.8594	3.65514	3.97923	3.8242	3.64312	1.49891e-12	D	Positive	P1	Ion transport and homeostasis	Binding;Cellular component organization or biogenesis;Localization and transport;Membrane;Organelle	GO:0005515;GO:0005737;GO:0015171;GO:0016021;GO:0016323;GO:0070062;GO:1902475;REACT_146056;REACT_81153;REACT_94160	amino acid transmembrane transporter activity;basolateral plasma membrane;cytoplasm;extracellular vesicular exosome;integral component of membrane;L-alpha-amino acid transmembrane transport;protein binding;SLC-mediated transmembrane transport;Transmembrane transport of small molecules;Transport of inorganic cations/anions and amino acids/oligopeptides
gene:ENSMUSG00000001901	chr11:106008123-106034549	Kcnh6	6.39754	6.24353	6.63832	6.37204	5.18509	1.87827e-12	A;D	Positive	E15.5_Ngn3_Het;P1	Ion transport and homeostasis;Membrane potential and Ion channels	Biosynthesis and Catalytical activity;Environmental information processing, response to stimulus and signaling;Genetic Information process;Localization and transport;Membrane;System process	GO:0004871;GO:0007165;GO:0010468;GO:0016021;GO:0022843;GO:0044459;GO:0046873;GO:0071805;GO:1903506;GO:2000112;REACT_130040;REACT_42352;REACT_86563	integral component of membrane;metal ion transmembrane transporter activity;Neuronal System;plasma membrane part;Potassium Channels;potassium ion transmembrane transport;regulation of cellular macromolecule biosynthetic process;regulation of gene expression;regulation of nucleic acid-templated transcription;signal transducer activity;signal transduction;voltage-gated cation channel activity;Volta…
gene:ENSMUSG00000037843	chr2:157914652-157944719	Vstm2l	5.27784	9.53654	10.4055	11.3822	11.7707	1.88915e-12	D	Positive	P1	Unclassified	Binding	GO:0005515	protein binding
gene:ENSMUSG00000052516	chr16:73892305-74411825	Robo2	2.34035	6.29251	5.3778	5.29834	6.10948	2.05802e-12	D;U	Positive	P1;P60	Unclassified	Adhesion, communication, aggregation and migration;Binding;Developmental process and reproduction;Environmental information processing, response to stimulus and signaling;Membrane;Organelle;System process	GO:0000003;GO:0000904;GO:0004888;GO:0006928;GO:0006935;GO:0007155;GO:0007548;GO:0009719;GO:0009888;GO:0009986;GO:0010033;GO:0032102;GO:0032589;GO:0033267;GO:0035295;GO:0046982;GO:0048666;GO:0048858;GO:0050772;GO:0070062;GO:0070887;path:mmu04360	Axon guidance - Mus musculus (mouse);axon part;cell adhesion;cell morphogenesis involved in differentiation;cell projection morphogenesis;cell surface;cellular response to chemical stimulus;chemotaxis;extracellular vesicular exosome;movement of cell or subcellular component;negative regulation of response to external stimulus;neuron development;neuron projection membrane;positive regulation of ax…
gene:ENSMUSG00000055407	chr7:99267446-99337137	Map6	6.08058	8.56212	8.52802	8.60612	8.68977	2.43061e-12	A;D	Positive	E15.5_Ngn3_Het;P1	Calcium-mediated processing	Binding;Cellular component organization or biogenesis;Developmental process and reproduction;Localization and transport;Organelle	GO:0000226;GO:0005516;GO:0005794;GO:0005874;GO:0008017;GO:0048471;GO:0048813;GO:0051640	calmodulin binding;dendrite morphogenesis;Golgi apparatus;microtubule;microtubule binding;microtubule cytoskeleton organization;organelle localization;perinuclear region of cytoplasm
gene:ENSMUSG00000032202	chr9:73044853-73097629	Rab27a	2.15232	3.83334	3.59794	3.47861	3.23582	2.44205e-12	D	Positive	P1	GTPase and G-protein activity;Vesicle-mediated transport and secretion by cell	Adhesion, communication, aggregation and migration;Binding;Biological regulation and behavior;Biosynthesis and Catalytical activity;Cellular component organization or biogenesis;Developmental process and reproduction;Environmental information processing, response to stimulus and signaling;Immune system;Localization and transport;Membrane;Organelle;System process	GO:0001750;GO:0003924;GO:0005525;GO:0005764;GO:0005794;GO:0005829;GO:0006605;GO:0006887;GO:0006913;GO:0007264;GO:0007596;GO:0016324;GO:0016337;GO:0017022;GO:0019003;GO:0019882;GO:0019904;GO:0030141;GO:0030154;GO:0030425;GO:0030659;GO:0031902;GO:0045087;GO:0045321;GO:0045921;GO:0051656;GO:0070062;GO:1902580	antigen processing and presentation;apical plasma membrane;blood coagulation;cell differentiation;cytoplasmic vesicle membrane;cytosol;dendrite;establishment of organelle localization;exocytosis;extracellular vesicular exosome;GDP binding;Golgi apparatus;GTP binding;GTPase activity;innate immune response;late endosome membrane;leukocyte activation;lysosome;myosin binding;nucleocytoplasmic transpo…
gene:ENSMUSG00000071265	chr12:74288734-74295945	1700086L19Rik	10.586	9.83985	9.60355	8.97038	8.0521	2.51665e-12	A	Positive	E15.5_Ngn3_Het			Singleton	Singleton
gene:ENSMUSG00000039809	chr4:46662317-46991873	Gabbr2	6.33301	8.78371	8.69935	8.86159	9.64866	2.80209e-12	A;D	Positive	E15.5_Ngn3_Het;P1	GTPase and G-protein activity;Membrane potential and Ion channels	Adhesion, communication, aggregation and migration;Binding;Cellular component organization or biogenesis;Environmental information processing, response to stimulus and signaling;Localization and transport;Membrane;System process	GO:0004930;GO:0005515;GO:0005737;GO:0005887;GO:0007186;GO:0030054;GO:0043005;GO:0043235;GO:0045211;path:mmu04080;path:mmu04727;path:mmu05032;REACT_104910;REACT_106459;REACT_108208;REACT_109210;REACT_115202;REACT_134544;REACT_136556;REACT_34241;REACT_42352;REACT_77799;REACT_80839;REACT_83946;REACT_85878;REACT_86563;REACT_87898;REACT_88524;REACT_90291	Activation of G protein gated Potassium channels;Activation of GABAB receptors;cell junction;Class C/3 (Metabotropic glutamate/pheromone receptors);cytoplasm;G-protein coupled receptor activity;G-protein coupled receptor signaling pathway;G alpha (i) signalling events;G protein gated Potassium channels;GABA B receptor activation;GABA receptor activation;GABAergic synapse - Mus musculus (mouse);GP…
gene:ENSMUSG00000037610	chr3:31902506-32200180	Kcnmb2	5.18902	7.63718	7.18114	7.41832	6.81731	2.90234e-12	A;D	Positive	E15.5_Ngn3_Het;P1	Calcium-mediated processing;Insulin processing and signaling;Ion transport and homeostasis;Membrane potential and Ion channels	Biological regulation and behavior;Environmental information processing, response to stimulus and signaling;Immune system;Localization and transport;System process	GO:0008076;GO:0009593;GO:0015269;GO:0019228;GO:0051592;GO:0071805;path:mmu04270;path:mmu04911;REACT_42352;REACT_81688;REACT_86563;REACT_89750	calcium-activated potassium channel activity;detection of chemical stimulus;Hemostasis;Insulin secretion - Mus musculus (mouse);neuronal action potential;Neuronal System;Platelet homeostasis;Potassium Channels;potassium ion transmembrane transport;response to calcium ion;Vascular smooth muscle contraction - Mus musculus (mouse);voltage-gated potassium channel complex
gene:ENSMUSG00000009075	chr11:4736891-4746778	Cabp7	5.78677	7.74052	7.70672	7.69048	6.72404	3.12672e-12	D;U	Positive	P1;P60	Calcium-mediated processing;Vesicle-mediated transport and secretion by cell	Binding;Cellular component organization or biogenesis;Membrane;Organelle	GO:0005509;GO:0005802;GO:0005886;GO:0016021;GO:0048471;GO:0098588	bounding membrane of organelle;calcium ion binding;integral component of membrane;perinuclear region of cytoplasm;plasma membrane;trans-Golgi network
gene:ENSMUSG00000031170	chrX:8271132-8280179	Slc38a5	6.73816	5.69622	3.63613	1.57858	-3.42915	3.13305e-12	Singleton	Positive	E15.5_Ngn3_Het			Singleton	Singleton
gene:ENSMUSG00000063142	chr14:23289430-23803304	Kcnma1	7.10353	9.11506	8.87047	8.51415	8.5398	3.34044e-12	A;D	Positive	E15.5_Ngn3_Het;P1	Calcium-mediated processing;Insulin processing and signaling;Ion transport and homeostasis;Membrane potential and Ion channels;Oxidation-reduction and Oxygen-mediated activity	Adhesion, communication, aggregation and migration;Binding;Biological regulation and behavior;Cell cycle, proliferation, growth and death;Cellular component organization or biogenesis;Developmental process and reproduction;Environmental information processing, response to stimulus and signaling;Localization and transport;Membrane;Metabolism;Organelle;System process	GO:0001666;GO:0003779;GO:0005249;GO:0005783;GO:0006875;GO:0006937;GO:0006970;GO:0007268;GO:0007605;GO:0007628;GO:0008076;GO:0009986;GO:0010565;GO:0014848;GO:0015269;GO:0016324;GO:0019218;GO:0019228;GO:0021700;GO:0022600;GO:0030004;GO:0035315;GO:0042311;GO:0043065;GO:0043195;GO:0045121;GO:0045211;GO:0046903;GO:0048468;GO:0048511;GO:0050885;GO:0051241;GO:0051260;GO:0051592;GO:0060004;GO:0060073;GO:…	actin binding;adult walking behavior;apical plasma membrane;calcium-activated potassium channel activity;cell development;cell surface;cellular metal ion homeostasis;cellular monovalent inorganic cation homeostasis;developmental maturation;digestive system process;endoplasmic reticulum;extracellular vesicular exosome;hair cell differentiation;inner ear receptor cell differentiation;Insulin secret…
gene:ENSMUSG00000041141	chr7:16959794-16962319	Pnmal1	6.79081	7.92226	7.86031	7.86006	7.07446	3.3975e-12	A	Positive	E15.5_Ngn3_Het			Singleton	Singleton
gene:ENSMUSG00000056752	chr11:65831281-66168551	Dnah9	5.99901	7.40546	6.52772	5.18093	2.43605	3.4347e-12	E;L	Positive	P1;P4	Unclassified	Cellular component organization or biogenesis;Metabolism	GO:0005875;GO:0008152;GO:0044444	cytoplasmic part;metabolic process;microtubule associated complex
gene:ENSMUSG00000040721	chr14:55060261-55092324	Zfhx2	2.24831	3.65091	4.15733	3.74494	3.56796	3.52884e-12	D	Positive	P1	Unclassified	Binding;Biological regulation and behavior;Genetic Information process;Organelle	GO:0003700;GO:0003779;GO:0005634;GO:0006996;GO:0008270;GO:0030534;GO:0043565;GO:1903506	actin binding;adult behavior;nucleus;organelle organization;regulation of nucleic acid-templated transcription;sequence-specific DNA binding;sequence-specific DNA binding transcription factor activity;zinc ion binding
gene:ENSMUSG00000070880	chr2:70553071-70602014	Gad1	7.4755	10.7442	10.0935	10.0613	10.5588	3.54805e-12	A;D	Positive	E15.5_Ngn3_Het;P1	Insulin processing and signaling;Oxoacid metabolic process and Fatty acid activity;Vesicle-mediated transport and secretion by cell	Adhesion, communication, aggregation and migration;Binding;Biosynthesis and Catalytical activity;Cellular component organization or biogenesis;Disease;Environmental information processing, response to stimulus and signaling;Localization and transport;Metabolism;System process	GO:0005739;GO:0005938;GO:0016597;GO:0016830;GO:0032787;GO:0042136;GO:0042493;GO:0043679;GO:0044238;GO:0044283;GO:0046982;GO:0047485;GO:0048786;GO:0097159;GO:1901363;GO:1901564;GO:1901576;path:mmu04727;path:mmu04940;REACT_106459;REACT_29928;REACT_86563;REACT_98298	amino acid binding;axon terminus;carbon-carbon lyase activity;cell cortex;GABA synthesis, release, reuptake and degradation;GABAergic synapse - Mus musculus (mouse);heterocyclic compound binding;mitochondrion;monocarboxylic acid metabolic process;Neuronal System;neurotransmitter biosynthetic process;Neurotransmitter Release Cycle;organic cyclic compound binding;organic substance biosynthetic proc…
gene:ENSMUSG00000029819	chr6:49822709-49829507	Npy	7.15309	10.5398	8.22541	8.03734	8.80864	3.64286e-12	D	Positive	P1	GTPase and G-protein activity	Binding;Developmental process and reproduction;Environmental information processing, response to stimulus and signaling;System process	GO:0001664;GO:0005179;GO:0007218;GO:0007420;GO:0008217;GO:0031175;path:mmu05034	Alcoholism - Mus musculus (mouse);brain development;G-protein coupled receptor binding;hormone activity;neuron projection development;neuropeptide signaling pathway;regulation of blood pressure
gene:ENSMUSG00000044139	chr7:127885840-127890970	Prss53	2.59298	7.11941	7.18759	7.70754	9.0853	3.73346e-12	U	Positive	P60	Unclassified	Biosynthesis and Catalytical activity;Cellular component organization or biogenesis;Metabolism	GO:0005576;GO:0006508;GO:0016787	extracellular region;hydrolase activity;proteolysis
gene:ENSMUSG00000022421	chr15:79786351-79834333	Nptxr	2.38474	5.53011	5.35772	5.37536	5.28881	3.86713e-12	D	Positive	P1			Singleton	Singleton
gene:ENSMUSG00000057069	chr13:12565882-12609526	Ero1lb	1.0776	3.73754	3.64834	3.80614	4.72244	3.87412e-12	D;U	Positive	P1;P60	Insulin processing and signaling;Oxidation-reduction and Oxygen-mediated activity;Oxoacid metabolic process and Fatty acid activity	Binding;Biosynthesis and Catalytical activity;Cellular component organization or biogenesis;Localization and transport;Membrane;Metabolism	GO:0005515;GO:0005789;GO:0006457;GO:0006520;GO:0016491;GO:0016860;GO:0030070;GO:0030198;GO:0032787;GO:0046483;GO:0055114;GO:1901360;path:mmu04141	cellular amino acid metabolic process;endoplasmic reticulum membrane;extracellular matrix organization;heterocycle metabolic process;insulin processing;intramolecular oxidoreductase activity;monocarboxylic acid metabolic process;organic cyclic compound metabolic process;oxidation-reduction process;oxidoreductase activity;protein binding;protein folding;Protein processing in endoplasmic reticulum …
gene:ENSMUSG00000025586	chr7:81347025-81455465	Cpeb1	5.19828	8.64295	9.3117	9.66198	10.6266	4.13991e-12	D;U	Positive	P1;P60	Insulin processing and signaling;Oxidation-reduction and Oxygen-mediated activity	Adhesion, communication, aggregation and migration;Binding;Biological regulation and behavior;Biosynthesis and Catalytical activity;Cell cycle, proliferation, growth and death;Cellular component organization or biogenesis;Developmental process and reproduction;Environmental information processing, response to stimulus and signaling;Genetic Information process;Membrane;Metabolism;Organelle	GO:0000003;GO:0005515;GO:0005634;GO:0005737;GO:0005819;GO:0006397;GO:0010468;GO:0014069;GO:0022607;GO:0030054;GO:0030529;GO:0032269;GO:0032869;GO:0036094;GO:0044822;GO:0045211;GO:0046872;GO:0048168;GO:0048285;GO:0071456;GO:1902589;GO:2000112;path:mmu04114;path:mmu04914	cell junction;cellular component assembly;cellular response to hypoxia;cellular response to insulin stimulus;cytoplasm;metal ion binding;mRNA processing;negative regulation of cellular protein metabolic process;nucleus;Oocyte meiosis - Mus musculus (mouse);organelle fission;poly(A) RNA binding;postsynaptic density;postsynaptic membrane;Progesterone-mediated oocyte maturation - Mus musculus (mouse…
gene:ENSMUSG00000040387	chr4:24612553-24851124	Klhl32	4.58213	6.03325	6.32086	6.07623	5.84872	4.23195e-12	D	Positive	P1	Unclassified	Binding	GO:0005515	protein binding
gene:ENSMUSG00000045967	chr2:21367541-21830547	Gpr158	3.98279	9.81903	10.4895	11.3041	12.3291	4.33831e-12	D;U	Positive	P1;P60	GTPase and G-protein activity	Binding;Environmental information processing, response to stimulus and signaling;Localization and transport;Membrane	GO:0004888;GO:0005515;GO:0005886;GO:0007186;GO:0008277;GO:0016021;GO:0072659	G-protein coupled receptor signaling pathway;integral component of membrane;plasma membrane;protein binding;protein localization to plasma membrane;regulation of G-protein coupled receptor protein signaling pathway;transmembrane signaling receptor activity
gene:ENSMUSG00000045871	chr14:110748577-110755149	Slitrk6	5.60033	7.12465	6.76332	6.57788	7.10523	4.40759e-12	A;D	Positive	E15.5_Ngn3_Het;P1	Unclassified	Binding;Biological regulation and behavior;Cell cycle, proliferation, growth and death;Developmental process and reproduction;Environmental information processing, response to stimulus and signaling;Membrane;System process	GO:0001964;GO:0002093;GO:0005515;GO:0005887;GO:0007409;GO:0007416;GO:0007601;GO:0007605;GO:0008344;GO:0009986;GO:0035264;GO:0043010;GO:0060004;GO:0060384;GO:0090102	adult locomotory behavior;auditory receptor cell morphogenesis;axonogenesis;camera-type eye development;cell surface;cochlea development;innervation;integral component of plasma membrane;multicellular organism growth;protein binding;reflex;sensory perception of sound;startle response;synapse assembly;visual perception
gene:ENSMUSG00000046157	chr12:78961794-79007627	Tmem229b	1.41941	3.97753	4.16166	3.47568	3.46871	4.74909e-12	D	Positive	P1	Unclassified	Membrane	GO:0016021	integral component of membrane
gene:ENSMUSG00000028444	chr4:41657497-41697089	Cntfr	3.22928	7.14075	6.45904	5.83509	5.41728	5.01488e-12	D	Positive	P1	Unclassified	Binding;Biological regulation and behavior;Cell cycle, proliferation, growth and death;Cellular component organization or biogenesis;Developmental process and reproduction;Environmental information processing, response to stimulus and signaling;Membrane	GO:0004896;GO:0005515;GO:0005886;GO:0007275;GO:0007548;GO:0019221;GO:0042127;GO:0043066;GO:0043234;GO:0044425;GO:0048522;GO:1901215	cytokine-mediated signaling pathway;cytokine receptor activity;membrane part;multicellular organismal development;negative regulation of apoptotic process;negative regulation of neuron death;plasma membrane;positive regulation of cellular process;protein binding;protein complex;regulation of cell proliferation;sex differentiation
gene:ENSMUSG00000011751	chr7:27356382-27447686	Sptbn4	3.79096	6.61815	6.99779	7.14431	7.35912	5.02365e-12	D;U	Positive	P1;P60	Ion transport and homeostasis;Membrane potential and Ion channels	Adhesion, communication, aggregation and migration;Binding;Biological regulation and behavior;Cell cycle, proliferation, growth and death;Cellular component organization or biogenesis;Developmental process and reproduction;Genetic Information process;Localization and transport;Membrane;Metabolism;System process	GO:0001932;GO:0002027;GO:0003779;GO:0005543;GO:0005654;GO:0005886;GO:0005912;GO:0006521;GO:0007409;GO:0007605;GO:0007628;GO:0009566;GO:0010959;GO:0019226;GO:0019902;GO:0021954;GO:0030507;GO:0033270;GO:0043025;GO:0044430;GO:0044448;GO:0045162;GO:0045184;GO:0045822;GO:0048639;GO:0051240;GO:0072659;REACT_127416;REACT_92778	actin binding;adherens junction;adult walking behavior;Axon guidance;axonogenesis;cell cortex part;central nervous system neuron development;clustering of voltage-gated sodium channels;cytoskeletal part;Developmental Biology;establishment of protein localization;fertilization;negative regulation of heart contraction;neuronal cell body;nucleoplasm;paranode region of axon;phosphatase binding;phosph…
gene:ENSMUSG00000049191	chrX:102066543-102071304	Rgag4	4.84059	5.19657	5.40914	5.32121	4.76685	5.34484e-12	A	Positive	E15.5_Ngn3_Het			Singleton	Singleton
gene:ENSMUSG00000057716	chr6:39873270-40255150	Tmem178b	6.09473	8.13642	7.1898	7.13492	7.13638	6.21114e-12	D	Positive	P1	Unclassified	Membrane	GO:0016021	integral component of membrane
gene:ENSMUSG00000019124	chr6:54505889-54566489	Scrn1	4.00068	5.5364	5.52343	5.37643	5.91091	6.43252e-12	A;D	Positive	E15.5_Ngn3_Het;P1	Vesicle-mediated transport and secretion by cell	Biosynthesis and Catalytical activity;Cellular component organization or biogenesis;Localization and transport;Membrane;Metabolism	GO:0005737;GO:0006508;GO:0006887;GO:0008238;GO:0031965	cytoplasm;exocytosis;exopeptidase activity;nuclear membrane;proteolysis
gene:ENSMUSG00000049044	chr2:71981239-72257474	Rapgef4	3.44	4.931	5.03671	5.09953	4.95935	6.62392e-12	A;D	Positive	E15.5_Ngn3_Het;P1	GTPase and G-protein activity;Insulin processing and signaling;Vesicle-mediated transport and secretion by cell	Binding;Biological regulation and behavior;Biosynthesis and Catalytical activity;Cellular component organization or biogenesis;Environmental information processing, response to stimulus and signaling;Immune system;Localization and transport;Membrane;Metabolism	GO:0001932;GO:0005088;GO:0005829;GO:0005952;GO:0007264;GO:0016020;GO:0017156;GO:0017157;GO:0019887;GO:0019932;GO:0030073;GO:0030552;GO:0043087;GO:0043549;GO:0051020;GO:1902531;path:mmu04911;REACT_103583;REACT_105810;REACT_112621;REACT_115202;REACT_88236;REACT_89750;REACT_98439	calcium ion-dependent exocytosis;cAMP-dependent protein kinase complex;cAMP binding;cytosol;GTPase binding;Hemostasis;insulin secretion;Insulin secretion - Mus musculus (mouse);Integration of energy metabolism;membrane;Metabolism;Platelet activation, signaling and aggregation;protein kinase regulator activity;Ras guanyl-nucleotide exchange factor activity;regulation of exocytosis;regulation of GT…
gene:ENSMUSG00000040543	chr11:72047527-72135778	Pitpnm3	3.0963	7.125	8.09311	7.61198	7.88628	6.70619e-12	D;U	Positive	P1;P60	Unclassified	Binding;Localization and transport;Membrane	GO:0005515;GO:0012505;GO:0016020;GO:0046872	endomembrane system;membrane;metal ion binding;protein binding
gene:ENSMUSG00000055409	chr7:49974863-50865255	Nell1	2.44364	6.87781	8.02931	8.71609	9.14425	7.16815e-12	D;U	Positive	P1;P60	Calcium-mediated processing	Binding;Cell cycle, proliferation, growth and death;Cellular component organization or biogenesis;Developmental process and reproduction;Genetic Information process;Localization and transport;Metabolism;System process	GO:0005509;GO:0005515;GO:0005576;GO:0005634;GO:0008285;GO:0012505;GO:0030501;GO:0032269;GO:0044763;GO:0045597;GO:0048471	calcium ion binding;endomembrane system;extracellular region;negative regulation of cell proliferation;negative regulation of cellular protein metabolic process;nucleus;perinuclear region of cytoplasm;positive regulation of bone mineralization;positive regulation of cell differentiation;protein binding;single-organism cellular process
gene:ENSMUSG00000018411	chr11:104231389-104332090	Mapt	5.20677	6.10723	6.28877	5.02823	5.68551	7.29439e-12	A;D	Positive	E15.5_Ngn3_Het;P1	Unclassified	Adhesion, communication, aggregation and migration;Binding;Biological regulation and behavior;Cellular component organization or biogenesis;Developmental process and reproduction;Environmental information processing, response to stimulus and signaling;Genetic Information process;Localization and transport;Membrane;Organelle;System process	GO:0000226;GO:0001764;GO:0005829;GO:0005886;GO:0007628;GO:0008017;GO:0010638;GO:0015630;GO:0019901;GO:0019904;GO:0030424;GO:0030426;GO:0030516;GO:0031110;GO:0031334;GO:0032271;GO:0032387;GO:0043234;GO:0044428;GO:0044430;GO:0044441;GO:0047497;GO:0048675;GO:0050772;GO:0070013;path:mmu04010	adult walking behavior;axon;axon extension;ciliary part;cytoskeletal part;cytosol;growth cone;intracellular organelle lumen;MAPK signaling pathway - Mus musculus (mouse);microtubule binding;microtubule cytoskeleton;microtubule cytoskeleton organization;mitochondrion transport along microtubule;negative regulation of intracellular transport;neuron migration;nuclear part;plasma membrane;positive re…
gene:ENSMUSG00000035722	chr10:79996493-80015572	Abca7	2.45827	4.00045	3.67404	3.60266	2.88878	7.44638e-12	A;D;U	Positive	E15.5_Ngn3_Het;P1;P60	Ion transport and homeostasis;Vesicle-mediated transport and secretion by cell	Binding;Biological regulation and behavior;Biosynthesis and Catalytical activity;Cellular component organization or biogenesis;Environmental information processing, response to stimulus and signaling;Localization and transport;Membrane;Metabolism;Organelle;System process	GO:0004871;GO:0005515;GO:0005524;GO:0005548;GO:0005768;GO:0006464;GO:0006897;GO:0007009;GO:0007166;GO:0007613;GO:0010876;GO:0015711;GO:0016021;GO:0016324;GO:0016887;GO:0030100;GO:0032370;GO:0032587;GO:0034504;GO:0044431;GO:0051171;GO:0051246;GO:0051345;GO:0051346;GO:0065003;GO:0065008;GO:0070374;GO:0098588;GO:1903793;GO:2000113;path:mmu02010;REACT_110770;REACT_115490;REACT_94160	ABC-family proteins mediated transport;ABC transporters - Mus musculus (mouse);ABCA transporters in lipid homeostasis;apical plasma membrane;ATP binding;ATPase activity;bounding membrane of organelle;cell surface receptor signaling pathway;cellular protein modification process;endocytosis;endosome;Golgi apparatus part;integral component of membrane;lipid localization;macromolecular complex assemb…
gene:ENSMUSG00000051166	chr12:98786603-98901484	Eml5	2.58977	3.38732	3.26695	3.31072	3.51163	8.17335e-12	A;D	Positive	E15.5_Ngn3_Het;P1	Unclassified	Binding;Cellular component organization or biogenesis;Organelle	GO:0005515;GO:0005737;GO:0005874;GO:0070062	cytoplasm;extracellular vesicular exosome;microtubule;protein binding
gene:ENSMUSG00000031374	chrX:73411095-73428385	Zfp92	5.62159	7.0868	7.45057	7.35196	7.28656	8.22919e-12	D	Positive	P1	Unclassified	Binding;Genetic Information process	GO:0005634;GO:0006351;GO:0006355;GO:0046872;GO:0097159;GO:1901363	heterocyclic compound binding;metal ion binding;nucleus;organic cyclic compound binding;regulation of transcription, DNA-templated;transcription, DNA-templated
gene:ENSMUSG00000015829	chr1:159737509-159924397	Tnr	6.03555	9.83605	8.55232	8.02713	3.89971	8.55172e-12	D	Positive	P1	Unclassified	Adhesion, communication, aggregation and migration;Binding;Biological regulation and behavior;Cell cycle, proliferation, growth and death;Cellular component organization or biogenesis;Developmental process and reproduction;Membrane;Organelle	GO:0001558;GO:0005515;GO:0006928;GO:0007420;GO:0009986;GO:0030154;GO:0032535;GO:0043231;GO:0044425;GO:0048167;GO:0050806;GO:0051093;REACT_131142	brain development;cell differentiation;cell surface;Extracellular matrix organization;intracellular membrane-bounded organelle;membrane part;movement of cell or subcellular component;negative regulation of developmental process;positive regulation of synaptic transmission;protein binding;regulation of cell growth;regulation of cellular component size;regulation of synaptic plasticity
gene:ENSMUSG00000078161	chr3:154762156-154767787	BC007180	5.77293	8.46631	9.3237	9.01458	9.54058	8.64075e-12	D	Positive	P1			Singleton	Singleton
gene:ENSMUSG00000051980	chr16:36493695-36562141	Casr	3.84342	5.85509	6.19637	5.86532	5.24455	8.75744e-12	A;D	Positive	E15.5_Ngn3_Het;P1	Calcium-mediated processing;Glycolysis, Glucose processing, Pyruvate metabolism and TCA cycle;GTPase and G-protein activity;Insulin processing and signaling;Ion transport and homeostasis;Membrane potential and Ion channels;Oxidation-reduction and Oxygen-mediated activity;Protein tyrosine and serine/threonine kinase activity	Adhesion, communication, aggregation and migration;Binding;Biological regulation and behavior;Biosynthesis and Catalytical activity;Cell cycle, proliferation, growth and death;Cellular component organization or biogenesis;Developmental process and reproduction;Environmental information processing, response to stimulus and signaling;Genetic Information process;Localization and transport;Membrane;S…	GO:0000287;GO:0001503;GO:0001666;GO:0002931;GO:0004930;GO:0005102;GO:0005509;GO:0005634;GO:0005737;GO:0006816;GO:0006874;GO:0006915;GO:0007193;GO:0007254;GO:0008284;GO:0009986;GO:0010628;GO:0016021;GO:0016323;GO:0016324;GO:0019229;GO:0019901;GO:0031670;GO:0032024;GO:0032403;GO:0034765;GO:0042311;GO:0043025;GO:0043679;GO:0044325;GO:0048754;GO:0050839;GO:0050927;GO:0051345;GO:0051592;GO:0051928;GO:…	adenylate cyclase-inhibiting G-protein coupled receptor signaling pathway;adipose tissue development;apical plasma membrane;apoptotic process;axon terminus;basolateral plasma membrane;branching morphogenesis of an epithelial tube;calcium ion binding;calcium ion transport;cell adhesion molecule binding;cell surface;cellular calcium ion homeostasis;cellular response to alcohol;cellular response to …
gene:ENSMUSG00000049154	chr11:58792796-58801960	Fam183b	6.70473	7.25818	6.67846	6.79054	6.95137	9.04799e-12	A	Positive	E15.5_Ngn3_Het			Singleton	Singleton
gene:ENSMUSG00000061911	chr12:29528383-29923209	Myt1l	7.06744	8.99762	9.74963	9.6521	9.34909	9.7713e-12	A;D	Positive	E15.5_Ngn3_Het;P1	Unclassified	Binding;Genetic Information process	GO:0003700;GO:0005515;GO:0005634;GO:0006355;GO:0008270	nucleus;protein binding;regulation of transcription, DNA-templated;sequence-specific DNA binding transcription factor activity;zinc ion binding
gene:ENSMUSG00000028439	chr4:41517690-41569538	Fam219a	3.84778	4.79715	4.89182	4.66736	4.68733	1.00437e-11	D	Positive	P1			Singleton	Singleton
gene:ENSMUSG00000039474	chr5:36966103-36988982	Wfs1	1.71045	2.98934	3.64981	3.59378	3.77226	1.01502e-11	D;K;U	Positive	P1;P4;P60	Calcium-mediated processing;Glycolysis, Glucose processing, Pyruvate metabolism and TCA cycle;Ion transport and homeostasis	Binding;Biological regulation and behavior;Cell cycle, proliferation, growth and death;Developmental process and reproduction;Environmental information processing, response to stimulus and signaling;Genetic Information process;Localization and transport;Membrane;Metabolism;System process	GO:0005516;GO:0006508;GO:0006886;GO:0006984;GO:0007635;GO:0019725;GO:0030176;GO:0030425;GO:0031325;GO:0031625;GO:0031647;GO:0033613;GO:0034976;GO:0042593;GO:0043433;GO:0043524;GO:0048306;GO:0048513;GO:0050891;GO:0050954;GO:0051117;GO:0051726;GO:0051928;GO:0055065;GO:0071310;GO:1901575;GO:1902236;GO:1902582	activating transcription factor binding;ATPase binding;calcium-dependent protein binding;calmodulin binding;cellular homeostasis;cellular response to organic substance;chemosensory behavior;dendrite;ER-nucleus signaling pathway;glucose homeostasis;integral component of endoplasmic reticulum membrane;intracellular protein transport;metal ion homeostasis;multicellular organismal water homeostasis;n…
gene:ENSMUSG00000042873	chr6:113168089-113195384	Lhfpl4	4.56507	7.27938	7.39457	7.55514	8.32662	1.01996e-11	D	Positive	P1	Unclassified	Membrane	GO:0016021	integral component of membrane
gene:ENSMUSG00000041729	chr9:62419491-62537044	Coro2b	2.69936	4.93022	5.44165	5.16424	5.5459	1.02447e-11	D;U	Positive	P1;P60	Unclassified	Binding;Cellular component organization or biogenesis;Membrane;Organelle	GO:0005737;GO:0005856;GO:0016020;GO:0051015;GO:1902589	actin filament binding;cytoplasm;cytoskeleton;membrane;single-organism organelle organization
gene:ENSMUSG00000020847	chr11:75830998-75938429	Rph3al	3.06176	3.16672	2.94454	2.8764	2.51079	1.04371e-11	A	Positive	E15.5_Ngn3_Het	Glycolysis, Glucose processing, Pyruvate metabolism and TCA cycle;GTPase and G-protein activity;Vesicle-mediated transport and secretion by cell	Binding;Biological regulation and behavior;Environmental information processing, response to stimulus and signaling;Localization and transport;Organelle	GO:0006886;GO:0019904;GO:0030141;GO:0032940;GO:0042493;GO:0042593;GO:0044446;GO:0045744;GO:0046872;GO:0050714	glucose homeostasis;intracellular organelle part;intracellular protein transport;metal ion binding;negative regulation of G-protein coupled receptor protein signaling pathway;positive regulation of protein secretion;protein domain specific binding;response to drug;secretion by cell;secretory granule
gene:ENSMUSG00000021913	chr14:32322018-32347820	Ogdhl	0.775314	4.11889	3.20119	3.25735	4.07643	1.08201e-11	D;U	Positive	P1;P60	Oxidation-reduction and Oxygen-mediated activity;Oxoacid metabolic process and Fatty acid activity	Binding;Biosynthesis and Catalytical activity;Metabolism	GO:0015980;GO:0016491;GO:0043168;GO:0050662;path:mmu00380	anion binding;coenzyme binding;energy derivation by oxidation of organic compounds;oxidoreductase activity;Tryptophan metabolism - Mus musculus (mouse)
gene:ENSMUSG00000017943	chr2:163438475-163455324	Gdap1l1	6.2667	6.95376	6.55009	6.05603	6.37706	1.10897e-11	D	Positive	P1	Unclassified	Binding	GO:0005515	protein binding
gene:ENSMUSG00000055022	chr15:92051164-92341967	Cntn1	4.93504	8.55952	7.99398	6.85637	8.72121	1.11236e-11	D;U	Positive	P1;P60	Ion transport and homeostasis	Adhesion, communication, aggregation and migration;Binding;Cellular component organization or biogenesis;Developmental process and reproduction;Disease;Environmental information processing, response to stimulus and signaling;Genetic Information process;Localization and transport;Membrane;Organelle	GO:0005515;GO:0005886;GO:0007155;GO:0007166;GO:0010628;GO:0010959;GO:0010975;GO:0016043;GO:0021549;GO:0030246;GO:0045666;GO:0070062;REACT_118324;REACT_30240	carbohydrate binding;cell adhesion;cell surface receptor signaling pathway;cellular component organization;cerebellum development;Disease;extracellular vesicular exosome;Neurofascin interactions;plasma membrane;positive regulation of gene expression;positive regulation of neuron differentiation;protein binding;regulation of metal ion transport;regulation of neuron projection development
gene:ENSMUSG00000025777	chr1:17145361-17164271	Gdap1	5.47493	7.35173	7.05111	7.2276	8.1675	1.13725e-11	A;D	Positive	E15.5_Ngn3_Het;P1	Unclassified	Binding;Environmental information processing, response to stimulus and signaling;Genetic Information process;Localization and transport;Membrane;Organelle	GO:0005515;GO:0005634;GO:0005741;GO:0006605;GO:0016482;GO:0031301;GO:0042221;GO:0048285;GO:0072594;GO:1902580	cytoplasmic transport;establishment of protein localization to organelle;integral component of organelle membrane;mitochondrial outer membrane;nucleus;organelle fission;protein binding;protein targeting;response to chemical;single-organism cellular localization
gene:ENSMUSG00000090291	chr19:10455370-10457447	Lrrc10b	6.41117	8.57167	8.86109	9.32369	9.85449	1.15967e-11	D	Positive	P1	Unclassified	Binding	GO:0005515	protein binding
gene:ENSMUSG00000031303	chrX:159988432-160123351	Map3k15	4.29519	4.06768	3.92233	3.39135	4.64031	1.39045e-11	A;U	Positive	E15.5_Ngn3_Het;P60	Unclassified	Binding;Biosynthesis and Catalytical activity;Environmental information processing, response to stimulus and signaling;Metabolism	GO:0006464;GO:0007165;GO:0016740;GO:0032550;GO:0035639;GO:0046872	cellular protein modification process;metal ion binding;purine ribonucleoside binding;purine ribonucleoside triphosphate binding;signal transduction;transferase activity
gene:ENSMUSG00000068617	chr16:14906636-14925879	Efcab1	3.40248	4.21363	4.16131	4.02465	4.6979	1.43928e-11	D	Positive	P1	Calcium-mediated processing	Binding	GO:0005509	calcium ion binding
gene:ENSMUSG00000090071	chr1:74855028-74857732	Cdk5r2	6.63098	8.89794	9.14429	9.13064	9.06019	1.44259e-11	A;D	Positive	E15.5_Ngn3_Het;P1	Protein tyrosine and serine/threonine kinase activity;Vesicle-mediated transport and secretion by cell	Adhesion, communication, aggregation and migration;Binding;Biosynthesis and Catalytical activity;Cellular component organization or biogenesis;Developmental process and reproduction;Localization and transport;Membrane	GO:0001764;GO:0005737;GO:0005886;GO:0008047;GO:0008092;GO:0008289;GO:0019887;GO:0021549;GO:0021586;GO:0021987;GO:0042063;GO:0043234;GO:0045860;GO:0045956;GO:0048646;GO:0048857;GO:0071900	anatomical structure formation involved in morphogenesis;cerebellum development;cerebral cortex development;cytoplasm;cytoskeletal protein binding;enzyme activator activity;gliogenesis;lipid binding;neural nucleus development;neuron migration;plasma membrane;pons maturation;positive regulation of calcium ion-dependent exocytosis;positive regulation of protein kinase activity;protein complex;prote…
gene:ENSMUSG00000025743	chr4:130792536-130826319	Sdc3	2.61433	4.34505	3.60225	2.8517	3.58648	1.48091e-11	D	Positive	P1			Singleton	Singleton
gene:ENSMUSG00000074892	chr16:96235800-96319859	B3galt5	3.22891	6.10462	6.84546	7.00743	7.05918	1.48802e-11	D;U	Positive	P1;P60	Unclassified	Biosynthesis and Catalytical activity;Membrane;Organelle	GO:0000139;GO:0005783;GO:0006486;GO:0008378;GO:0016021	endoplasmic reticulum;galactosyltransferase activity;Golgi membrane;integral component of membrane;protein glycosylation
gene:ENSMUSG00000040687	chr2:91137359-91183837	Madd	1.54387	2.99638	3.44843	3.10552	3.11837	1.55829e-11	D;U	Positive	P1;P60	GTPase and G-protein activity;Protein tyrosine and serine/threonine kinase activity	Binding;Biosynthesis and Catalytical activity;Cell cycle, proliferation, growth and death;Cellular component organization or biogenesis;Environmental information processing, response to stimulus and signaling;Membrane	GO:0000187;GO:0005088;GO:0005515;GO:0005737;GO:0005886;GO:0006915;GO:0016021;GO:0043547;GO:0046578;GO:0051726;GO:2001234;GO:2001236	activation of MAPK activity;apoptotic process;cytoplasm;integral component of membrane;negative regulation of apoptotic signaling pathway;plasma membrane;positive regulation of GTPase activity;protein binding;Ras guanyl-nucleotide exchange factor activity;regulation of cell cycle;regulation of extrinsic apoptotic signaling pathway;regulation of Ras protein signal transduction
gene:ENSMUSG00000027457	chr2:151590548-151632593	Snph	5.4969	8.05703	8.16896	8.79996	8.00361	1.66377e-11	D	Positive	P1	Vesicle-mediated transport and secretion by cell	Adhesion, communication, aggregation and migration;Binding;Cellular component organization or biogenesis;Developmental process and reproduction;Membrane;System process	GO:0005739;GO:0005874;GO:0007399;GO:0016021;GO:0017075;GO:0030054;GO:0030154;GO:0031967;GO:0042734;GO:0043005;GO:0043025;GO:0048513;GO:0060322	cell differentiation;cell junction;head development;integral component of membrane;microtubule;mitochondrion;nervous system development;neuron projection;neuronal cell body;organ development;organelle envelope;presynaptic membrane;syntaxin-1 binding
gene:ENSMUSG00000049556	chr9:56618474-56685253	Lingo1	4.08317	4.44661	5.22163	4.97531	3.32971	1.76609e-11	D;O	Positive	P1;P12	Unclassified	Binding;Biological regulation and behavior;Cellular component organization or biogenesis;Developmental process and reproduction;Environmental information processing, response to stimulus and signaling;Membrane	GO:0005515;GO:0016021;GO:0030030;GO:0030182;GO:0035556;GO:0048523;GO:0050767;GO:0071944;REACT_94799	cell periphery;cell projection organization;integral component of membrane;intracellular signal transduction;negative regulation of cellular process;neuron differentiation;p75 NTR receptor-mediated signalling;protein binding;regulation of neurogenesis
gene:ENSMUSG00000043388	chr5:144735914-144761649	Tmem130	3.72828	6.29873	7.35054	7.09507	8.30154	1.90199e-11	D;U	Positive	P1;P60	Unclassified	Membrane	GO:0000139;GO:0016021	Golgi membrane;integral component of membrane
gene:ENSMUSG00000034799	chr8:71624416-71671757	Unc13a	3.22506	4.25847	4.60118	4.17769	4.60994	1.90669e-11	A;D	Positive	E15.5_Ngn3_Het;P1	Vesicle-mediated transport and secretion by cell	Adhesion, communication, aggregation and migration;Binding;Biological regulation and behavior;Cellular component organization or biogenesis;Developmental process and reproduction;Environmental information processing, response to stimulus and signaling;Localization and transport;Membrane;Metabolism;Organelle;System process	GO:0005515;GO:0005737;GO:0007270;GO:0008289;GO:0016079;GO:0016188;GO:0022406;GO:0030054;GO:0030424;GO:0035556;GO:0042734;GO:0043603;GO:0046872;GO:0048168;GO:0050806;GO:0050808;GO:0060384;GO:1901564;GO:1903530;path:mmu04721	axon;cell junction;cellular amide metabolic process;cytoplasm;innervation;intracellular signal transduction;lipid binding;membrane docking;metal ion binding;neuron-neuron synaptic transmission;organonitrogen compound metabolic process;positive regulation of synaptic transmission;presynaptic membrane;protein binding;regulation of neuronal synaptic plasticity;regulation of secretion by cell;synapse…
gene:ENSMUSG00000039126	chr19:16956117-17223932	Prune2	2.62324	3.68617	4.04249	4.06238	5.72689	1.92731e-11	U	Positive	P60	Unclassified	Genetic Information process;Organelle	GO:0005634;GO:0005794	Golgi apparatus;nucleus
gene:ENSMUSG00000094626	chr6:120488938-120493807	Cecr6	6.69709	8.07142	7.84955	7.19112	5.15831	1.93117e-11	O	Positive	P12			Singleton	Singleton
gene:ENSMUSG00000079157	chr8:9206000-9771018	Fam155a	4.84397	7.16276	7.38649	7.53397	8.18503	1.94528e-11	D	Positive	P1	Unclassified	Membrane	GO:0016021	integral component of membrane
gene:ENSMUSG00000026609	chr1:188262022-188965041	Ush2a	5.54925	8.33361	7.756	7.20945	7.05844	2.00936e-11	A;D	Positive	E15.5_Ngn3_Het;P1	Unclassified	Binding;Biological regulation and behavior;Cellular component organization or biogenesis;Developmental process and reproduction;Environmental information processing, response to stimulus and signaling;Membrane;System process	GO:0005578;GO:0005737;GO:0005902;GO:0007601;GO:0007605;GO:0016021;GO:0016324;GO:0017022;GO:0031253;GO:0032403;GO:0035315;GO:0043234;GO:0045494;GO:0045596;GO:0050896;GO:0060113	apical plasma membrane;cell projection membrane;cytoplasm;hair cell differentiation;inner ear receptor cell differentiation;integral component of membrane;microvillus;myosin binding;negative regulation of cell differentiation;photoreceptor cell maintenance;protein complex;protein complex binding;proteinaceous extracellular matrix;response to stimulus;sensory perception of sound;visual perception
gene:ENSMUSG00000029166	chr5:30814640-30866106	Mapre3	3.49037	4.19976	3.93087	3.87379	3.48471	2.02576e-11	A;D	Positive	E15.5_Ngn3_Het;P1	Protein tyrosine and serine/threonine kinase activity	Binding;Biosynthesis and Catalytical activity;Cell cycle, proliferation, growth and death;Cellular component organization or biogenesis;Genetic Information process;Metabolism;Organelle	GO:0000280;GO:0001934;GO:0006355;GO:0008017;GO:0010628;GO:0015630;GO:0030496;GO:0043234;GO:0044430;GO:0045787;GO:0048471;GO:0051099;GO:0071900;GO:1902589;GO:1902680;GO:1903047	cytoskeletal part;microtubule binding;microtubule cytoskeleton;midbody;mitotic cell cycle process;nuclear division;perinuclear region of cytoplasm;positive regulation of binding;positive regulation of cell cycle;positive regulation of gene expression;positive regulation of protein phosphorylation;positive regulation of RNA biosynthetic process;protein complex;regulation of protein serine/threonin…
gene:ENSMUSG00000041895	chr11:109573330-109611967	Wipi1	1.31818	3.87917	3.36069	2.8547	3.20335	2.10859e-11	D	Positive	P1	Vesicle-mediated transport and secretion by cell	Binding;Cellular component organization or biogenesis;Localization and transport;Membrane;Metabolism;Organelle	GO:0005543;GO:0005768;GO:0005794;GO:0005829;GO:0006996;GO:0016023;GO:0016192;GO:0016236;GO:0022607;GO:0050681;GO:0051656;GO:0098588;GO:1902582	androgen receptor binding;bounding membrane of organelle;cellular component assembly;cytoplasmic membrane-bounded vesicle;cytosol;endosome;establishment of organelle localization;Golgi apparatus;macroautophagy;organelle organization;phospholipid binding;single-organism intracellular transport;vesicle-mediated transport
gene:ENSMUSG00000087694	chr2:114013601-114032292	A530058N18Rik	6.54588	8.81654	9.00593	9.17268	9.79489	2.11027e-11	D	Positive	P1			Singleton	Singleton
gene:ENSMUSG00000025020	chr19:41600256-41743665	Slit1	6.1745	8.17829	6.51837	5.90738	5.64658	2.15627e-11	A;D	Positive	E15.5_Ngn3_Het;P1	Unclassified	Adhesion, communication, aggregation and migration;Binding;Biological regulation and behavior;Cellular component organization or biogenesis;Developmental process and reproduction;Environmental information processing, response to stimulus and signaling;Localization and transport	GO:0005622;GO:0007411;GO:0022029;GO:0030516;GO:0043168;GO:0048523;GO:0048585;GO:0048675;GO:0051640;GO:1901681	anion binding;axon extension;axon guidance;intracellular;negative regulation of cellular process;negative regulation of response to stimulus;organelle localization;regulation of axon extension;sulfur compound binding;telencephalon cell migration
gene:ENSMUSG00000019699	chr1:177020072-177258203	Akt3	2.44794	3.62582	3.60199	3.47394	3.08246	2.16175e-11	A;D	Positive	E15.5_Ngn3_Het;P1	GTPase and G-protein activity;Insulin processing and signaling;Protein tyrosine and serine/threonine kinase activity	Adhesion, communication, aggregation and migration;Binding;Biosynthesis and Catalytical activity;Developmental process and reproduction;Disease;Environmental information processing, response to stimulus and signaling;Genetic Information process;Membrane;Metabolism;Organelle	GO:0004674;GO:0004713;GO:0005515;GO:0005524;GO:0005634;GO:0005794;GO:0005886;GO:0006468;GO:0006996;GO:0007165;GO:0018209;GO:0032869;path:mmu04010;path:mmu04012;path:mmu04014;path:mmu04062;path:mmu04151;path:mmu04530;path:mmu04668;path:mmu04722;path:mmu04725;path:mmu04728;path:mmu04910;path:mmu04914;path:mmu04915;path:mmu04917;path:mmu05210;path:mmu05212;path:mmu05213;path:mmu05214;path:mmu05221;p…	Acute myeloid leukemia - Mus musculus (mouse);ATP binding;cellular response to insulin stimulus;Chemokine signaling pathway - Mus musculus (mouse);Cholinergic synapse - Mus musculus (mouse);Colorectal cancer - Mus musculus (mouse);Dopaminergic synapse - Mus musculus (mouse);Endometrial cancer - Mus musculus (mouse);ErbB signaling pathway - Mus musculus (mouse);Estrogen signaling pathway - Mus mus…
gene:ENSMUSG00000023809	chr17:7170114-7303313	Rps6ka2	1.41608	3.72561	3.88224	3.67316	3.09842	2.22316e-11	D;O	Positive	P1;P12	Calcium-mediated processing;GTPase and G-protein activity;Protein tyrosine and serine/threonine kinase activity	Adhesion, communication, aggregation and migration;Binding;Biosynthesis and Catalytical activity;Cell cycle, proliferation, growth and death;Cellular component organization or biogenesis;Developmental process and reproduction;Environmental information processing, response to stimulus and signaling;Genetic Information process;Immune system;Localization and transport;Membrane;Metabolism;System proc…	GO:0000287;GO:0004674;GO:0004713;GO:0005515;GO:0005524;GO:0005654;GO:0005737;GO:0005819;GO:0006915;GO:0007281;GO:0008285;GO:0008610;GO:0010564;GO:0010628;GO:0016020;GO:0018105;GO:0031975;GO:0034645;GO:0035556;GO:0043065;GO:0044262;GO:0048513;GO:0051128;GO:0070613;GO:0071322;GO:0072358;GO:1901137;path:mmu04010;path:mmu04150;path:mmu04720;REACT_106459;REACT_107772;REACT_109325;REACT_111033;REACT_13…	Activation of NMDA receptor upon glutamate binding and postsynaptic events;apoptotic process;ATP binding;carbohydrate derivative biosynthetic process;cardiovascular system development;cellular carbohydrate metabolic process;cellular macromolecule biosynthetic process;cellular response to carbohydrate stimulus;CREB phosphorylation through the activation of Ras;cytoplasm;envelope;Gastrin-CREB signa…
gene:ENSMUSG00000026959	chr2:25291180-25319187	Grin1	3.72814	8.39267	8.37745	9.04171	9.11501	2.31319e-11	D;U	Positive	P1;P60	Calcium-mediated processing;GTPase and G-protein activity;Ion transport and homeostasis;Membrane potential and Ion channels	Adhesion, communication, aggregation and migration;Binding;Biological regulation and behavior;Cell cycle, proliferation, growth and death;Cellular component organization or biogenesis;Developmental process and reproduction;Disease;Environmental information processing, response to stimulus and signaling;Genetic Information process;Localization and transport;Membrane;Metabolism;Organelle;System pro…	GO:0000003;GO:0001661;GO:0001964;GO:0004888;GO:0005244;GO:0005261;GO:0005509;GO:0005516;GO:0005783;GO:0005887;GO:0006805;GO:0006874;GO:0007165;GO:0007270;GO:0007613;GO:0007635;GO:0008021;GO:0008344;GO:0009416;GO:0009636;GO:0009986;GO:0010038;GO:0010769;GO:0014070;GO:0015276;GO:0019233;GO:0019899;GO:0021586;GO:0022607;GO:0030054;GO:0030426;GO:0030900;GO:0031012;GO:0032102;GO:0032589;GO:0034765;GO:…	Activation of NMDA receptor upon glutamate binding and postsynaptic events;adult locomotory behavior;Alcoholism - Mus musculus (mouse);Alzheimer,s disease - Mus musculus (mouse);Amphetamine addiction - Mus musculus (mouse);anion binding;calcium ion binding;calcium ion transmembrane transport;Calcium signaling pathway - Mus musculus (mouse);calmodulin binding;cation channel activity;cell junction;…
gene:ENSMUSG00000042216	chr5:113243219-113310786	Sgsm1	2.067	3.50268	3.32794	2.90497	2.70342	2.37313e-11	D	Positive	P1	GTPase and G-protein activity	Biosynthesis and Catalytical activity;Cellular component organization or biogenesis	GO:0005083;GO:0005622;GO:0032851	intracellular;positive regulation of Rab GTPase activity;small GTPase regulator activity
gene:ENSMUSG00000039954	chr18:43207696-43317481	Stk32a	1.96594	5.26441	5.43637	4.90881	5.00999	2.39254e-11	D;U	Positive	P1;P60	Protein tyrosine and serine/threonine kinase activity	Binding;Biosynthesis and Catalytical activity;Metabolism	GO:0004674;GO:0004713;GO:0005524;GO:0006468;GO:0046872	ATP binding;metal ion binding;protein phosphorylation;protein serine/threonine kinase activity;protein tyrosine kinase activity
gene:ENSMUSG00000022237	chr15:31291478-31367759	Ankrd33b	4.04346	8.49514	8.62127	7.91751	8.48186	2.39957e-11	D	Positive	P1	Unclassified	Binding;Genetic Information process	GO:0003677;GO:0005515	DNA binding;protein binding
gene:ENSMUSG00000028445	chr4:41638143-41640324	Enho	4.46877	6.45435	6.6965	6.70895	6.95343	2.46436e-11	D	Positive	P1	Unclassified	Cellular component organization or biogenesis	GO:0005576	extracellular region
gene:ENSMUSG00000020635	chr12:4833174-4841595	Fkbp1b	2.34912	6.48724	6.96289	7.10979	6.75695	2.58465e-11	D;U	Positive	P1;P60	Glycolysis, Glucose processing, Pyruvate metabolism and TCA cycle;Ion transport and homeostasis;Membrane potential and Ion channels;Vesicle-mediated transport and secretion by cell	Adhesion, communication, aggregation and migration;Binding;Biological regulation and behavior;Biosynthesis and Catalytical activity;Cell cycle, proliferation, growth and death;Cellular component organization or biogenesis;Developmental process and reproduction;Environmental information processing, response to stimulus and signaling;Immune system;Localization and transport;Membrane;Metabolism;Syst…	GO:0000166;GO:0002027;GO:0003824;GO:0005102;GO:0005246;GO:0005789;GO:0006457;GO:0006936;GO:0006937;GO:0006950;GO:0007204;GO:0008283;GO:0009749;GO:0010035;GO:0010921;GO:0010976;GO:0014070;GO:0015031;GO:0015833;GO:0016528;GO:0018193;GO:0019226;GO:0019932;GO:0030016;GO:0031667;GO:0032844;GO:0034703;GO:0035305;GO:0042110;GO:0043086;GO:0043271;GO:0044325;GO:0045822;GO:0046879;GO:0046888;GO:0050709;GO:…	calcium channel regulator activity;catalytic activity;cation channel complex;cell proliferation;divalent metal ion transport;endoplasmic reticulum membrane;hormone secretion;ion channel binding;muscle contraction;myofibril;negative regulation of catalytic activity;negative regulation of dephosphorylation;negative regulation of heart contraction;negative regulation of hormone secretion;negative re…
gene:ENSMUSG00000073530	chr1:158711726-158980490	Pappa2	5.97995	7.31097	6.77588	4.31458	4.02823	2.64975e-11	L	Positive	P4	Unclassified	Biosynthesis and Catalytical activity	GO:0070011	peptidase activity, acting on L-amino acid peptides
gene:ENSMUSG00000063011	chr17:25748613-25754327	Msln	1.69929	7.29807	8.15225	8.94467	2.41944	2.87211e-11	Q	Positive	P12			Singleton	Singleton
gene:ENSMUSG00000026113	chr1:37299864-37410736	Inpp4a	1.64948	3.52157	3.08699	3.08025	2.89212	3.04768e-11	D	Positive	P1	Unclassified	Binding;Biosynthesis and Catalytical activity;Environmental information processing, response to stimulus and signaling;Metabolism	GO:0005515;GO:0008610;GO:0016311;GO:0042578;GO:0044248;GO:0044249;GO:0046488;GO:1901575;path:mmu00562;path:mmu04070;REACT_112621;REACT_132440;REACT_144613;REACT_146100;REACT_153901	cellular biosynthetic process;cellular catabolic process;dephosphorylation;Inositol phosphate metabolism;Inositol phosphate metabolism - Mus musculus (mouse);lipid biosynthetic process;Metabolism;organic substance catabolic process;phosphatidylinositol metabolic process;Phosphatidylinositol signaling system - Mus musculus (mouse);Phospholipid metabolism;phosphoric ester hydrolase activity;PI Meta…
gene:ENSMUSG00000043668	chr8:90247039-90348343	Tox3	3.99164	3.61997	2.82836	2.51556	1.82043	3.07344e-11	E	Positive	P1	Unclassified	Binding	GO:0042803	protein homodimerization activity
gene:ENSMUSG00000024553	chr18:82392495-82406777	Galr1	6.0722	7.37347	8.09883	8.53297	7.43901	3.16981e-11	A;D	Positive	E15.5_Ngn3_Het;P1	GTPase and G-protein activity;Ion transport and homeostasis;Vesicle-mediated transport and secretion by cell	Binding;Biological regulation and behavior;Biosynthesis and Catalytical activity;Environmental information processing, response to stimulus and signaling;Genetic Information process;Localization and transport;Membrane;System process	GO:0005515;GO:0005886;GO:0006355;GO:0007189;GO:0007204;GO:0007218;GO:0008188;GO:0010628;GO:0016021;GO:0017046;GO:0030817;GO:0031328;GO:0032370;GO:0043086;GO:0044057;GO:0045935;GO:0045980;GO:0046887;path:mmu04080;REACT_115202;REACT_137560;REACT_32532;REACT_34241;REACT_77799;REACT_85878;REACT_90291	adenylate cyclase-activating G-protein coupled receptor signaling pathway;Class A/1 (Rhodopsin-like receptors);G alpha (i) signalling events;GPCR downstream signaling;GPCR ligand binding;integral component of membrane;negative regulation of catalytic activity;negative regulation of nucleotide metabolic process;Neuroactive ligand-receptor interaction - Mus musculus (mouse);neuropeptide receptor ac…
gene:ENSMUSG00000030302	chr6:113745668-114042613	Atp2b2	4.74407	7.27046	7.54185	7.0911	7.9971	3.19219e-11	D;U	Positive	P1;P60	Calcium-mediated processing;Ion transport and homeostasis;Membrane potential and Ion channels	Adhesion, communication, aggregation and migration;Binding;Biological regulation and behavior;Cellular component organization or biogenesis;Developmental process and reproduction;Environmental information processing, response to stimulus and signaling;Immune system;Localization and transport;Membrane;Metabolism;Organelle;System process	GO:0002093;GO:0005388;GO:0005509;GO:0005516;GO:0005524;GO:0005783;GO:0005929;GO:0006874;GO:0006996;GO:0007595;GO:0007605;GO:0007626;GO:0008022;GO:0008361;GO:0009612;GO:0016021;GO:0016324;GO:0021680;GO:0030165;GO:0040011;GO:0043025;GO:0046068;GO:0048167;GO:0048646;GO:0050808;GO:0050885;GO:0051928;GO:0070588;GO:0090102;path:mmu04020;path:mmu04972;REACT_108918;REACT_32576;REACT_81688;REACT_93396;REA…	anatomical structure formation involved in morphogenesis;apical plasma membrane;ATP binding;auditory receptor cell morphogenesis;calcium-transporting ATPase activity;calcium ion binding;calcium ion transmembrane transport;Calcium signaling pathway - Mus musculus (mouse);calmodulin binding;cellular calcium ion homeostasis;cerebellar Purkinje cell layer development;cGMP metabolic process;cilium;coc…
gene:ENSMUSG00000028354	chr1:174501824-174822717	Fmn2	1.59142	4.84607	3.87025	3.70151	3.63482	3.46562e-11	D	Positive	P1	Oxidation-reduction and Oxygen-mediated activity;Vesicle-mediated transport and secretion by cell	Adhesion, communication, aggregation and migration;Binding;Cell cycle, proliferation, growth and death;Cellular component organization or biogenesis;Developmental process and reproduction;Environmental information processing, response to stimulus and signaling;Genetic Information process;Localization and transport;Membrane;Metabolism;Organelle	GO:0001666;GO:0003779;GO:0005819;GO:0005829;GO:0005886;GO:0005902;GO:0006928;GO:0007275;GO:0007281;GO:0012506;GO:0015629;GO:0016023;GO:0016192;GO:0030833;GO:0043066;GO:0043234;GO:0044425;GO:0044428;GO:0044433;GO:0051017;GO:0051495;GO:0051656;GO:0060255;GO:0070013;GO:0098588;GO:1902580	actin binding;actin cytoskeleton;actin filament bundle assembly;bounding membrane of organelle;cytoplasmic membrane-bounded vesicle;cytoplasmic vesicle part;cytosol;establishment of organelle localization;germ cell development;intracellular organelle lumen;membrane part;microvillus;movement of cell or subcellular component;multicellular organismal development;negative regulation of apoptotic proc…
gene:ENSMUSG00000027674	chr3:32949407-33143247	Pex5l	5.73831	6.4472	6.66134	6.33965	6.5544	3.75714e-11	A;D	Positive	E15.5_Ngn3_Het;P1	GTPase and G-protein activity;Membrane potential and Ion channels	Binding;Cellular component organization or biogenesis;Environmental information processing, response to stimulus and signaling;Localization and transport;Membrane;Organelle;System process	GO:0005777;GO:0005829;GO:0006605;GO:0016482;GO:0022406;GO:0030425;GO:0042391;GO:0043235;GO:0044438;GO:0051020;GO:0051235;GO:0055085;GO:0072594;GO:0098588;GO:1902531;GO:1902580;GO:1902589	bounding membrane of organelle;cytoplasmic transport;cytosol;dendrite;establishment of protein localization to organelle;GTPase binding;maintenance of location;membrane docking;microbody part;peroxisome;protein targeting;receptor complex;regulation of intracellular signal transduction;regulation of membrane potential;single-organism cellular localization;single-organism organelle organization;tra…
gene:ENSMUSG00000026409	chr1:130689042-130729253	Pfkfb2	1.1737	3.37959	3.18812	2.74724	2.86315	3.78798e-11	D	Positive	P1	Glycolysis, Glucose processing, Pyruvate metabolism and TCA cycle;Oxoacid metabolic process and Fatty acid activity;Vesicle-mediated transport and secretion by cell	Binding;Biosynthesis and Catalytical activity;Cellular component organization or biogenesis;Environmental information processing, response to stimulus and signaling;Localization and transport;Metabolism	GO:0002793;GO:0004331;GO:0005524;GO:0005737;GO:0006006;GO:0010033;GO:0010675;GO:0016301;GO:0016310;GO:0016311;GO:0016773;GO:0019901;GO:0032787;GO:0033674;GO:0044262;GO:0046887;GO:0050714;GO:0090276;GO:1901615;REACT_102834;REACT_112621;REACT_80637	ATP binding;cellular carbohydrate metabolic process;cytoplasm;dephosphorylation;fructose-2,6-bisphosphate 2-phosphatase activity;glucose metabolic process;Glucose metabolism;kinase activity;Metabolism;Metabolism of carbohydrates;monocarboxylic acid metabolic process;organic hydroxy compound metabolic process;phosphorylation;phosphotransferase activity, alcohol group as acceptor;positive regulatio…
gene:ENSMUSG00000039037	chr3:152817080-152982246	St6galnac5	5.36264	7.3263	7.18281	7.0058	5.76033	4.22328e-11	A;D	Positive	E15.5_Ngn3_Het;P1	Unclassified	Biosynthesis and Catalytical activity;Membrane;Metabolism;Organelle	GO:0005975;GO:0006464;GO:0006665;GO:0009101;GO:0016740;GO:0031301;GO:0044431;GO:0044711;GO:0098588	bounding membrane of organelle;carbohydrate metabolic process;cellular protein modification process;glycoprotein biosynthetic process;Golgi apparatus part;integral component of organelle membrane;single-organism biosynthetic process;sphingolipid metabolic process;transferase activity
gene:ENSMUSG00000091705	chr17:35342241-35346762	H2-Q2	2.77409	5.60209	6.04752	5.43475	5.7859	4.263e-11	D	Positive	P1	Insulin processing and signaling;Vesicle-mediated transport and secretion by cell	Adhesion, communication, aggregation and migration;Binding;Disease;Immune system;Localization and transport;Membrane	GO:0001916;GO:0005102;GO:0006955;GO:0016021;GO:0019882;GO:0042277;GO:0042612;path:mmu04144;path:mmu04514;path:mmu04612;path:mmu04940;path:mmu05168;path:mmu05320;path:mmu05330;path:mmu05332;path:mmu05416;REACT_107426;REACT_111008;REACT_129705;REACT_144862;REACT_86224	Allograft rejection - Mus musculus (mouse);Antigen Presentation: Folding, assembly and peptide loading of class I MHC;Antigen processing-Cross presentation;antigen processing and presentation;Antigen processing and presentation - Mus musculus (mouse);Autoimmune thyroid disease - Mus musculus (mouse);Cell adhesion molecules (CAMs) - Mus musculus (mouse);Class I MHC mediated antigen processing & pr…
gene:ENSMUSG00000075256	chr2:79330542-79456785	Cerkl	7.34646	8.9839	9.08318	9.03011	8.61442	4.47184e-11	A;D	Positive	E15.5_Ngn3_Het;P1	GTPase and G-protein activity	Biosynthesis and Catalytical activity;Cell cycle, proliferation, growth and death;Cellular component organization or biogenesis;Environmental information processing, response to stimulus and signaling;Metabolism	GO:0005737;GO:0007186;GO:0016301;GO:0016310;GO:0016773;GO:0043066	cytoplasm;G-protein coupled receptor signaling pathway;kinase activity;negative regulation of apoptotic process;phosphorylation;phosphotransferase activity, alcohol group as acceptor
gene:ENSMUSG00000069227	chr13:54736670-54749874	Gprin1	3.97482	5.46816	5.40779	5.15692	4.65917	4.61477e-11	A;D;O	Positive	E15.5_Ngn3_Het;P1;P12	Unclassified	Binding;Cellular component organization or biogenesis;Developmental process and reproduction;Membrane;System process	GO:0005515;GO:0005886;GO:0030030;GO:0030182;GO:0030426;GO:0048468	cell development;cell projection organization;growth cone;neuron differentiation;plasma membrane;protein binding
gene:ENSMUSG00000056222	chr13:57429294-57907587	Spock1	4.35372	7.58499	8.04023	6.66372	7.40388	4.70964e-11	D	Positive	P1	Calcium-mediated processing	Adhesion, communication, aggregation and migration;Binding;Biosynthesis and Catalytical activity;Cellular component organization or biogenesis;Developmental process and reproduction;Environmental information processing, response to stimulus and signaling;Metabolism	GO:0004857;GO:0005509;GO:0005515;GO:0005578;GO:0005615;GO:0007165;GO:0010721;GO:0010975;GO:0030155;GO:0031345;GO:0032269;GO:0051346;GO:0051961;GO:0070613	calcium ion binding;enzyme inhibitor activity;extracellular space;negative regulation of cell development;negative regulation of cell projection organization;negative regulation of cellular protein metabolic process;negative regulation of hydrolase activity;negative regulation of nervous system development;protein binding;proteinaceous extracellular matrix;regulation of cell adhesion;regulation o…
gene:ENSMUSG00000031824	chr8:120114151-120165306	6430548M08Rik	2.11753	4.56709	4.50887	4.15173	5.55535	4.79344e-11	U	Positive	P60			Singleton	Singleton
gene:ENSMUSG00000022211	chr14:55491092-55508246	Lrrc16b	2.28811	3.70847	3.04039	3.32998	2.72994	5.30963e-11	D	Positive	P1	Unclassified	Cellular component organization or biogenesis	GO:0005737	cytoplasm
gene:ENSMUSG00000025855	chr5:139017305-139150001	Prkar1b	2.47108	3.58139	3.17525	3.1788	3.60437	5.4094e-11	A;D;U	Positive	E15.5_Ngn3_Het;P1;P60	GTPase and G-protein activity;Insulin processing and signaling;Protein tyrosine and serine/threonine kinase activity	Binding;Biological regulation and behavior;Biosynthesis and Catalytical activity;Cellular component organization or biogenesis;Developmental process and reproduction;Disease;Environmental information processing, response to stimulus and signaling;Immune system;Localization and transport;Membrane;Metabolism;System process	GO:0005737;GO:0005886;GO:0005952;GO:0006464;GO:0007611;GO:0009887;GO:0016310;GO:0019901;GO:0030291;GO:0030552;GO:2000480;path:mmu04910;REACT_100635;REACT_105552;REACT_105810;REACT_112621;REACT_118233;REACT_118324;REACT_118380;REACT_134669;REACT_135572;REACT_148808;REACT_150083;REACT_32266;REACT_77799;REACT_78158;REACT_80348;REACT_86675;REACT_88236;REACT_89750;REACT_91043;REACT_94160;REACT_96308;R…	Aquaporin-mediated transport;cAMP-dependent protein kinase complex;cAMP binding;cellular protein modification process;cytoplasm;DAP12 interactions;DAP12 signaling;Disease;Downstream signal transduction;Downstream signaling of activated FGFR;Glucagon signaling in metabolic regulation;Hemostasis;Insulin signaling pathway - Mus musculus (mouse);Integration of energy metabolism;learning or memory;Met…
gene:ENSMUSG00000062380	chr8:123411423-123422015	Tubb3	6.10164	5.82614	5.47954	4.59153	5.64204	5.47883e-11	A	Positive	E15.5_Ngn3_Het	GTPase and G-protein activity	Adhesion, communication, aggregation and migration;Binding;Biosynthesis and Catalytical activity;Cell cycle, proliferation, growth and death;Cellular component organization or biogenesis;Genetic Information process;Organelle;System process	GO:0000280;GO:0003924;GO:0005634;GO:0007411;GO:0030424;GO:0030425;GO:0032550;GO:0032561;GO:0035639;GO:0043025;GO:0043232;GO:0043234;GO:1903047	axon;axon guidance;dendrite;GTPase activity;guanyl ribonucleotide binding;intracellular non-membrane-bounded organelle;mitotic cell cycle process;neuronal cell body;nuclear division;nucleus;protein complex;purine ribonucleoside binding;purine ribonucleoside triphosphate binding
gene:ENSMUSG00000049892	chr11:59963180-59964944	Rasd1	2.36961	4.44859	4.77927	3.75517	3.8199	5.49326e-11	D;K	Positive	P1;P4	GTPase and G-protein activity	Binding;Biosynthesis and Catalytical activity;Cellular component organization or biogenesis;Environmental information processing, response to stimulus and signaling;Genetic Information process;Localization and transport;Membrane	GO:0003924;GO:0005515;GO:0005525;GO:0005886;GO:0006886;GO:0006913;GO:0007264;GO:0010629;GO:0019932;GO:0048471;GO:1902679;GO:1903506;GO:2000113	GTP binding;GTPase activity;intracellular protein transport;negative regulation of cellular macromolecule biosynthetic process;negative regulation of gene expression;negative regulation of RNA biosynthetic process;nucleocytoplasmic transport;perinuclear region of cytoplasm;plasma membrane;protein binding;regulation of nucleic acid-templated transcription;second-messenger-mediated signaling;small …
gene:ENSMUSG00000037428	chr5:137030294-137033351	Vgf	6.5932	9.54716	8.90078	6.68204	10.286	5.5205e-11	D;U	Positive	P1;P60	Glycolysis, Glucose processing, Pyruvate metabolism and TCA cycle;Insulin processing and signaling	Binding;Biological regulation and behavior;Developmental process and reproduction;Localization and transport	GO:0005179;GO:0030073;GO:0042593;GO:0044703;GO:0048609	glucose homeostasis;hormone activity;insulin secretion;multi-organism reproductive process;multicellular organismal reproductive process
gene:ENSMUSG00000053141	chr2:161521989-162661147	Ptprt	3.14053	5.42127	6.15941	5.77067	4.3809	5.95078e-11	D;O	Positive	P1;P12	Unclassified	Adhesion, communication, aggregation and migration;Binding;Biosynthesis and Catalytical activity;Environmental information processing, response to stimulus and signaling;Membrane;Metabolism	GO:0004721;GO:0005886;GO:0006470;GO:0007156;GO:0007167;GO:0009986;GO:0016021;GO:0050839;GO:0051393	alpha-actinin binding;cell adhesion molecule binding;cell surface;enzyme linked receptor protein signaling pathway;homophilic cell adhesion via plasma membrane adhesion molecules;integral component of membrane;phosphoprotein phosphatase activity;plasma membrane;protein dephosphorylation
gene:ENSMUSG00000048388	chr2:83812635-83883486	Fam171b	3.29808	6.42649	6.51846	5.99268	7.94015	6.12564e-11	U	Positive	P60	Unclassified	Membrane	GO:0016021	integral component of membrane
gene:ENSMUSG00000035606	chr9:102506137-102546238	Ky	3.21828	5.79087	6.5984	6.7178	5.64288	6.22487e-11	D	Positive	P1	Unclassified	Cellular component organization or biogenesis;Developmental process and reproduction	GO:0007517;GO:0050808	muscle organ development;synapse organization
gene:ENSMUSG00000037762	chr10:70245099-70285968	Slc16a9	4.78584	6.81452	6.31017	6.5914	5.16295	6.25862e-11	A;D	Positive	E15.5_Ngn3_Het;P1	Unclassified	Localization and transport;Membrane;Metabolism	GO:0005215;GO:0005886;GO:0016021;GO:0034641;GO:0044281;GO:0046483;GO:0055085;GO:1901564	cellular nitrogen compound metabolic process;heterocycle metabolic process;integral component of membrane;organonitrogen compound metabolic process;plasma membrane;small molecule metabolic process;transmembrane transport;transporter activity
gene:ENSMUSG00000031442	chr8:12873805-13020905	Mcf2l	2.3188	3.05692	2.75807	2.61032	2.26686	6.37032e-11	A;D;O	Positive	E15.5_Ngn3_Het;P1;P12	GTPase and G-protein activity;Protein tyrosine and serine/threonine kinase activity	Adhesion, communication, aggregation and migration;Binding;Biosynthesis and Catalytical activity;Cell cycle, proliferation, growth and death;Cellular component organization or biogenesis;Environmental information processing, response to stimulus and signaling;Genetic Information process;Membrane	GO:0005089;GO:0005515;GO:0005576;GO:0006355;GO:0007264;GO:0008289;GO:0010628;GO:0016020;GO:0031252;GO:0031328;GO:0043087;GO:0043168;GO:0046578;GO:0051254;REACT_101159;REACT_77695;REACT_98119	anion binding;Cell death signalling via NRAGE, NRIF and NADE;cell leading edge;extracellular region;G alpha (12/13) signalling events;lipid binding;membrane;NRAGE signals death through JNK;positive regulation of cellular biosynthetic process;positive regulation of gene expression;positive regulation of RNA metabolic process;protein binding;regulation of GTPase activity;regulation of Ras protein s…
gene:ENSMUSG00000027950	chr3:89753447-89764632	Chrnb2	3.74858	5.12989	5.30502	5.21762	5.66406	6.40357e-11	A;D;U	Positive	E15.5_Ngn3_Het;P1;P60	Ion transport and homeostasis;Membrane potential and Ion channels;Oxidation-reduction and Oxygen-mediated activity;Vesicle-mediated transport and secretion by cell	Adhesion, communication, aggregation and migration;Binding;Biological regulation and behavior;Cell cycle, proliferation, growth and death;Cellular component organization or biogenesis;Developmental process and reproduction;Environmental information processing, response to stimulus and signaling;Immune system;Localization and transport;Membrane;Metabolism;System process	GO:0001661;GO:0001666;GO:0002694;GO:0005261;GO:0005887;GO:0006461;GO:0006816;GO:0007165;GO:0007274;GO:0007409;GO:0007601;GO:0007605;GO:0007613;GO:0007626;GO:0008284;GO:0008542;GO:0009897;GO:0015276;GO:0019233;GO:0021954;GO:0030054;GO:0030534;GO:0030900;GO:0033238;GO:0034220;GO:0034702;GO:0035094;GO:0035176;GO:0038023;GO:0042391;GO:0043235;GO:0045211;GO:0045321;GO:0045471;GO:0046982;GO:0048814;GO:…	adult behavior;ammonium ion binding;axonogenesis;calcium ion transport;cation channel activity;cell junction;central nervous system neuron development;Cholinergic synapse - Mus musculus (mouse);conditioned taste aversion;external side of plasma membrane;forebrain development;integral component of plasma membrane;ion channel complex;ion transmembrane transport;leukocyte activation;ligand-gated ion…
gene:ENSMUSG00000041633	chrX:153685153-153696391	Kctd12b	3.22255	4.62668	4.46003	4.01483	2.14869	6.44689e-11	D	Positive	P1	Unclassified	Binding;Environmental information processing, response to stimulus and signaling	GO:0005515;GO:0043235	protein binding;receptor complex
gene:ENSMUSG00000022941	chr16:94328419-94336935	Ripply3	4.5578	5.98787	6.57062	6.48107	5.83136	6.46972e-11	A;D	Positive	E15.5_Ngn3_Het;P1	Unclassified	Binding;Biosynthesis and Catalytical activity;Developmental process and reproduction;Genetic Information process	GO:0005515;GO:0005634;GO:0006351;GO:0006355;GO:0007507;GO:0043009;GO:0045934;GO:2000113	chordate embryonic development;heart development;negative regulation of cellular macromolecule biosynthetic process;negative regulation of nucleobase-containing compound metabolic process;nucleus;protein binding;regulation of transcription, DNA-templated;transcription, DNA-templated
gene:ENSMUSG00000025127	chr11:120530698-120538986	Gcgr	4.20459	7.416	7.74417	7.36551	6.35148	6.54876e-11	D	Positive	P1	Glycolysis, Glucose processing, Pyruvate metabolism and TCA cycle;GTPase and G-protein activity;Protein tyrosine and serine/threonine kinase activity;Vesicle-mediated transport and secretion by cell	Binding;Biological regulation and behavior;Environmental information processing, response to stimulus and signaling;Localization and transport;Membrane;Metabolism;Organelle	GO:0004930;GO:0005768;GO:0005887;GO:0006887;GO:0007189;GO:0009755;GO:0010675;GO:0017046;GO:0042593;GO:0042594;GO:0043467;GO:0071375;path:mmu04080;REACT_105339;REACT_105810;REACT_109465;REACT_112621;REACT_115202;REACT_133090;REACT_31167;REACT_32266;REACT_33090;REACT_34241;REACT_77799;REACT_85878	adenylate cyclase-activating G-protein coupled receptor signaling pathway;cellular response to peptide hormone stimulus;Class B/2 (Secretin family receptors);endosome;exocytosis;G-protein coupled receptor activity;G alpha (q) signalling events;G alpha (s) signalling events;Gastrin-CREB signalling pathway via PKC and MAPK;Glucagon-type ligand receptors;Glucagon signaling in metabolic regulation;gl…
gene:ENSMUSG00000015484	chr1:156075965-156205026	Fam163a	6.75068	6.74885	6.19937	6.12499	5.71676	6.97188e-11	A	Positive	E15.5_Ngn3_Het	Unclassified	Membrane	GO:0016021	integral component of membrane
gene:ENSMUSG00000036856	chr4:137277488-137299726	Wnt4	2.67971	4.67121	5.16659	6.27002	6.39183	7.05609e-11	D;O;P;U	Positive	P1;P12;P60	GTPase and G-protein activity	Adhesion, communication, aggregation and migration;Binding;Biosynthesis and Catalytical activity;Cell cycle, proliferation, growth and death;Cellular component organization or biogenesis;Developmental process and reproduction;Environmental information processing, response to stimulus and signaling;Genetic Information process;Localization and transport;Metabolism;Organelle;System process	GO:0001664;GO:0003712;GO:0005615;GO:0007267;GO:0007281;GO:0008283;GO:0008610;GO:0009986;GO:0016055;GO:0019216;GO:0030182;GO:0030501;GO:0030900;GO:0031012;GO:0032102;GO:0033043;GO:0042445;GO:0042594;GO:0043547;GO:0044089;GO:0044432;GO:0044706;GO:0045184;GO:0045596;GO:0045597;GO:0045785;GO:0045893;GO:0046578;GO:0051130;GO:0051726;GO:0060485;GO:0061041;GO:0071310;GO:0072659;GO:0090263	cell-cell signaling;cell proliferation;cell surface;cellular response to organic substance;endoplasmic reticulum part;establishment of protein localization;extracellular matrix;extracellular space;forebrain development;G-protein coupled receptor binding;germ cell development;hormone metabolic process;lipid biosynthetic process;mesenchyme development;multi-multicellular organism process;negative r…
gene:ENSMUSG00000019429	chr7:30854329-30856178	Ffar3	6.87358	9.56921	9.46078	9.04378	8.56182	7.38164e-11	A;D	Positive	E15.5_Ngn3_Het;P1	GTPase and G-protein activity;Membrane potential and Ion channels;Oxoacid metabolic process and Fatty acid activity;Protein tyrosine and serine/threonine kinase activity	Binding;Biological regulation and behavior;Environmental information processing, response to stimulus and signaling;Membrane;System process	GO:0002027;GO:0004930;GO:0005886;GO:0007193;GO:0008289;GO:0016021;GO:0070542;GO:0071229;GO:0071396;GO:0098900;GO:1901701;REACT_115202;REACT_133090;REACT_31167;REACT_32532;REACT_34241;REACT_77799;REACT_85878	adenylate cyclase-inhibiting G-protein coupled receptor signaling pathway;cellular response to acid chemical;cellular response to lipid;cellular response to oxygen-containing compound;Class A/1 (Rhodopsin-like receptors);G-protein coupled receptor activity;G alpha (q) signalling events;Gastrin-CREB signalling pathway via PKC and MAPK;GPCR downstream signaling;GPCR ligand binding;integral componen…
gene:ENSMUSG00000043518	chrX:161717068-161779496	Rai2	5.09145	5.89493	5.86555	6.10815	5.90597	7.38567e-11	D	Positive	P1	Unclassified	Binding	GO:0005515	protein binding
gene:ENSMUSG00000058254	chrX:10485157-10596605	Tspan7	2.20337	3.56975	2.60493	2.03113	2.34231	7.47747e-11	D	Positive	P1	Unclassified	Membrane	GO:0031224	intrinsic component of membrane
gene:ENSMUSG00000024064	chr17:73493227-73710453	Galnt14	3.25565	7.24004	7.79034	8.18213	8.04111	7.92874e-11	D;U	Positive	P1;P60	Unclassified	Binding;Biosynthesis and Catalytical activity;Membrane;Metabolism	GO:0000139;GO:0006486;GO:0008376;GO:0016021;GO:0046872;REACT_93132	acetylgalactosaminyltransferase activity;Golgi membrane;integral component of membrane;Metabolism of proteins;metal ion binding;protein glycosylation
gene:ENSMUSG00000027801	chr3:57425313-57441677	Tm4sf4	1.42495	3.20187	2.63612	2.67252	2.75009	8.39258e-11	D	Positive	P1	Unclassified	Developmental process and reproduction;Membrane	GO:0009888;GO:0016021;GO:0031099	integral component of membrane;regeneration;tissue development
gene:ENSMUSG00000030838	chr7:46195349-46238503	Ush1c	3.00534	3.85999	4.03864	3.82958	3.58407	8.67916e-11	A;D;O	Positive	E15.5_Ngn3_Het;P1;P12	Unclassified	Adhesion, communication, aggregation and migration;Binding;Biological regulation and behavior;Cell cycle, proliferation, growth and death;Cellular component organization or biogenesis;Developmental process and reproduction;Membrane;System process	GO:0001750;GO:0005829;GO:0005856;GO:0005886;GO:0005902;GO:0007605;GO:0017022;GO:0030507;GO:0035315;GO:0042471;GO:0044772;GO:0045177;GO:0045202;GO:0045494;GO:0050885;GO:0051017;GO:0060113	actin filament bundle assembly;apical part of cell;cytoskeleton;cytosol;ear morphogenesis;hair cell differentiation;inner ear receptor cell differentiation;microvillus;mitotic cell cycle phase transition;myosin binding;neuromuscular process controlling balance;photoreceptor cell maintenance;photoreceptor outer segment;plasma membrane;sensory perception of sound;spectrin binding;synapse
gene:ENSMUSG00000084842	chrX:103013697-103014387	Pabpc1l2b-ps	3.63902	6.74321	7.13392	7.14176	7.39136	8.90913e-11	D	Positive	P1			Singleton	Singleton
gene:ENSMUSG00000036745	chr3:146852366-146984009	Ttll7	2.18432	2.93867	2.94806	2.84569	2.84657	9.1098e-11	A;D;U	Positive	E15.5_Ngn3_Het;P1;P60	Unclassified	Biosynthesis and Catalytical activity;Cellular component organization or biogenesis;Developmental process and reproduction;Metabolism;System process	GO:0003824;GO:0005737;GO:0005856;GO:0005929;GO:0007399;GO:0018193;GO:0030154;GO:0030425;GO:0043204	catalytic activity;cell differentiation;cilium;cytoplasm;cytoskeleton;dendrite;nervous system development;peptidyl-amino acid modification;perikaryon
gene:ENSMUSG00000025375	chr11:120007312-120047167	Aatk	4.37405	5.63741	5.25086	5.08584	2.97166	9.14049e-11	D;O	Positive	P1;P12	GTPase and G-protein activity;Protein tyrosine and serine/threonine kinase activity	Binding;Biological regulation and behavior;Biosynthesis and Catalytical activity;Cell cycle, proliferation, growth and death;Cellular component organization or biogenesis;Developmental process and reproduction;Environmental information processing, response to stimulus and signaling;Localization and transport;Metabolism;Organelle;System process	GO:0001558;GO:0004713;GO:0005515;GO:0007264;GO:0007420;GO:0012505;GO:0031344;GO:0032535;GO:0032550;GO:0032559;GO:0035639;GO:0038083;GO:0043231;GO:0044295;GO:0044444;GO:0048523;GO:0050767;GO:0051093	adenyl ribonucleotide binding;axonal growth cone;brain development;cytoplasmic part;endomembrane system;intracellular membrane-bounded organelle;negative regulation of cellular process;negative regulation of developmental process;peptidyl-tyrosine autophosphorylation;protein binding;protein tyrosine kinase activity;purine ribonucleoside binding;purine ribonucleoside triphosphate binding;regulatio…
gene:ENSMUSG00000018800	chr11:110269368-110337716	Abca5	1.03705	3.32081	3.20357	3.47078	3.57485	9.34892e-11	D;U	Positive	P1;P60	Unclassified	Binding;Biosynthesis and Catalytical activity;Developmental process and reproduction;Localization and transport;Membrane;Organelle	GO:0005524;GO:0005764;GO:0005794;GO:0016021;GO:0016887;GO:0044440;GO:0044707;GO:0044763;GO:0045596;GO:0071702;GO:0098588;path:mmu02010	ABC transporters - Mus musculus (mouse);ATP binding;ATPase activity;bounding membrane of organelle;endosomal part;Golgi apparatus;integral component of membrane;lysosome;negative regulation of cell differentiation;organic substance transport;single-multicellular organism process;single-organism cellular process
gene:ENSMUSG00000092035	chr6:4747305-4760517	Peg10	6.3618	3.12005	-0.0303981	-2.4494	-3.29154	9.42011e-11	Singleton	Positive	E15.5_Ngn3_Het			Singleton	Singleton
gene:ENSMUSG00000091956	chr9:67759436-67760929	C2cd4b	3.80363	6.01605	5.70531	5.49804	6.25385	9.84723e-11	D	Positive	P1			Singleton	Singleton
gene:ENSMUSG00000062373	chr15:58782268-58823530	Tmem65	0.950514	3.34457	2.95005	2.52741	3.17244	1.00024e-10	D	Positive	P1	Unclassified	Cellular component organization or biogenesis;Membrane	GO:0005739;GO:0031224	intrinsic component of membrane;mitochondrion
gene:ENSMUSG00000029482	chr5:125475813-125517412	Aacs	1.71757	3.26682	3.2232	2.74797	1.4516	1.04362e-10	D	Positive	P1	Insulin processing and signaling	Binding;Biosynthesis and Catalytical activity;Cellular component organization or biogenesis;Developmental process and reproduction;Environmental information processing, response to stimulus and signaling;Localization and transport;Metabolism	GO:0000166;GO:0001889;GO:0003824;GO:0005829;GO:0006950;GO:0030154;GO:0043168;GO:0044710;GO:0050796;GO:0060612	adipose tissue development;anion binding;catalytic activity;cell differentiation;cytosol;liver development;nucleotide binding;regulation of insulin secretion;response to stress;single-organism metabolic process
gene:ENSMUSG00000051331	chr6:118592318-118780324	Cacna1c	3.73223	5.57332	5.49976	5.5759	4.6962	1.05502e-10	A;D;O	Positive	E15.5_Ngn3_Het;P1;P12	Calcium-mediated processing;Glycolysis, Glucose processing, Pyruvate metabolism and TCA cycle;GTPase and G-protein activity;Insulin processing and signaling;Ion transport and homeostasis;Membrane potential and Ion channels;Vesicle-mediated transport and secretion by cell	Adhesion, communication, aggregation and migration;Binding;Biological regulation and behavior;Cell cycle, proliferation, growth and death;Disease;Environmental information processing, response to stimulus and signaling;Localization and transport;Membrane;Metabolism;System process	GO:0005516;GO:0005891;GO:0006816;GO:0007204;GO:0007268;GO:0007628;GO:0008217;GO:0008331;GO:0008542;GO:0014069;GO:0014848;GO:0017156;GO:0019229;GO:0030016;GO:0030073;GO:0030315;GO:0034765;GO:0042593;GO:0043025;GO:0043198;GO:0044449;GO:0045121;GO:0046872;GO:0048638;GO:0051393;GO:0055085;GO:0060073;GO:0070509;GO:0086010;GO:0098590;path:mmu04010;path:mmu04020;path:mmu04270;path:mmu04713;path:mmu04720…	adult walking behavior;alpha-actinin binding;Alzheimer,s disease - Mus musculus (mouse);Amphetamine addiction - Mus musculus (mouse);Arrhythmogenic right ventricular cardiomyopathy (ARVC) - Mus musculus (mouse);calcium ion-dependent exocytosis;calcium ion import;calcium ion transport;Calcium signaling pathway - Mus musculus (mouse);calmodulin binding;Cholinergic synapse - Mus musculus (mouse);Cir…
gene:ENSMUSG00000025092	chr19:58795750-58860984	Hspa12a	2.30933	4.73824	5.20045	5.19947	4.77586	1.0565e-10	D	Positive	P1	Unclassified	Binding;Organelle	GO:0005524;GO:0070062	ATP binding;extracellular vesicular exosome
gene:ENSMUSG00000039347	chr6:48537568-48541798	Atp6v0e2	2.17234	3.61944	3.26818	3.72376	3.83628	1.05844e-10	D	Positive	P1	Insulin processing and signaling;Ion transport and homeostasis;Oxidation-reduction and Oxygen-mediated activity;Vesicle-mediated transport and secretion by cell	Biosynthesis and Catalytical activity;Developmental process and reproduction;Disease;Environmental information processing, response to stimulus and signaling;Immune system;Localization and transport;Membrane;Metabolism;Organelle	GO:0003824;GO:0008152;GO:0015077;GO:0015991;GO:0016021;GO:0033179;path:mmu00190;path:mmu04145;path:mmu04721;path:mmu04966;path:mmu05323;REACT_101230;REACT_115202;REACT_126778;REACT_146500;REACT_146901;REACT_80574;REACT_81379;REACT_94160	ATP hydrolysis coupled proton transport;catalytic activity;Collecting duct acid secretion - Mus musculus (mouse);Insulin receptor recycling;integral component of membrane;Iron uptake and transport;Latent infection of Homo sapiens with Mycobacterium tuberculosis;metabolic process;monovalent inorganic cation transmembrane transporter activity;Oxidative phosphorylation - Mus musculus (mouse);Phagoso…
gene:ENSMUSG00000041268	chr9:54365157-54501760	Dmxl2	1.8651	2.93695	2.68619	2.68665	2.68383	1.06696e-10	D	Positive	P1	GTPase and G-protein activity	Adhesion, communication, aggregation and migration;Binding;Cellular component organization or biogenesis;Membrane	GO:0005615;GO:0017137;GO:0030054;GO:0030672	cell junction;extracellular space;Rab GTPase binding;synaptic vesicle membrane
gene:ENSMUSG00000033826	chr17:30624353-30875264	Dnah8	0.850805	6.11147	6.28738	7.36161	7.61927	1.07259e-10	D;F;U	Positive	P1;P60	Unclassified	Binding;Biosynthesis and Catalytical activity;Cellular component organization or biogenesis	GO:0005737;GO:0015630;GO:0016887;GO:0032550;GO:0032559;GO:0035639;GO:0043234;GO:0044430;GO:0044441;GO:0044763	adenyl ribonucleotide binding;ATPase activity;ciliary part;cytoplasm;cytoskeletal part;microtubule cytoskeleton;protein complex;purine ribonucleoside binding;purine ribonucleoside triphosphate binding;single-organism cellular process
gene:ENSMUSG00000032034	chr9:32314782-32344237	Kcnj5	4.35577	6.00718	6.79033	8.15969	7.17623	1.08213e-10	D	Positive	P1	GTPase and G-protein activity;Ion transport and homeostasis;Membrane potential and Ion channels	Binding;Environmental information processing, response to stimulus and signaling;Localization and transport;Membrane	GO:0005249;GO:0005515;GO:0015276;GO:0016021;GO:0034765;REACT_104910;REACT_108208;REACT_109210;REACT_136556;REACT_80839;REACT_83946;REACT_87898	Activation of G protein gated Potassium channels;Activation of GABAB receptors;G protein gated Potassium channels;GABA B receptor activation;GABA receptor activation;Inhibition of voltage gated Ca2+ channels via Gbeta/gamma subunits;integral component of membrane;Inwardly rectifying K+ channels;ligand-gated ion channel activity;protein binding;regulation of ion transmembrane transport;voltage-gat…
gene:ENSMUSG00000032356	chr9:89909774-90026976	Rasgrf1	3.49697	6.52969	6.72321	6.6173	4.83979	1.08218e-10	D;O	Positive	P1;P12	Calcium-mediated processing;GTPase and G-protein activity;Ion transport and homeostasis	Adhesion, communication, aggregation and migration;Binding;Biological regulation and behavior;Biosynthesis and Catalytical activity;Cellular component organization or biogenesis;Developmental process and reproduction;Environmental information processing, response to stimulus and signaling;Genetic Information process;Localization and transport;System process	GO:0005088;GO:0005737;GO:0007264;GO:0030426;GO:0031175;GO:0035254;GO:0043547;GO:0046578;GO:0048168;GO:1902533;GO:2000310;path:mmu04510;REACT_106459;REACT_109325;REACT_111033;REACT_130630;REACT_141113;REACT_86563;REACT_88524	Activation of NMDA receptor upon glutamate binding and postsynaptic events;CREB phosphorylation through the activation of Ras;cytoplasm;Focal adhesion - Mus musculus (mouse);glutamate receptor binding;growth cone;neuron projection development;Neuronal System;Neurotransmitter Receptor Binding And Downstream Transmission In The Postsynaptic Cell;positive regulation of GTPase activity;positive regul…
gene:ENSMUSG00000050556	chr2:167103377-167190155	Kcnb1	4.17425	6.82844	6.78907	7.21145	6.42367	1.08877e-10	A;D	Positive	E15.5_Ngn3_Het;P1	Ion transport and homeostasis;Membrane potential and Ion channels	Binding;Cellular component organization or biogenesis;Environmental information processing, response to stimulus and signaling;Localization and transport;Membrane;System process	GO:0005249;GO:0008076;GO:0030425;GO:0032589;GO:0032809;GO:0034765;GO:0045211;GO:0047485;GO:0051260;GO:0071805;path:mmu04742;REACT_42352;REACT_86563	dendrite;neuron projection membrane;neuronal cell body membrane;Neuronal System;postsynaptic membrane;Potassium Channels;potassium ion transmembrane transport;protein homooligomerization;protein N-terminus binding;regulation of ion transmembrane transport;Taste transduction - Mus musculus (mouse);voltage-gated potassium channel activity;voltage-gated potassium channel complex
gene:ENSMUSG00000031803	chr8:71691718-71701800	B3gnt3	4.32326	7.80996	7.53609	7.73303	6.85376	1.11986e-10	D	Positive	P1	Unclassified	Biosynthesis and Catalytical activity;Membrane;Metabolism;Organelle	GO:0006486;GO:0008378;GO:0016021;GO:0044431;GO:0098588;REACT_112621;REACT_120555;REACT_93132	bounding membrane of organelle;galactosyltransferase activity;Golgi apparatus part;integral component of membrane;Metabolism;Metabolism of proteins;O-linked glycosylation of mucins;protein glycosylation
gene:ENSMUSG00000029408	chr5:124061529-124095798	Abcb9	3.30016	4.1228	4.25849	3.72671	3.67084	1.14847e-10	A;D	Positive	E15.5_Ngn3_Het;P1	Unclassified	Binding;Biosynthesis and Catalytical activity;Localization and transport;Membrane;Organelle	GO:0005765;GO:0005789;GO:0015031;GO:0015405;GO:0015833;GO:0016820;GO:0016887;GO:0031301;GO:0032550;GO:0032559;GO:0035639;GO:0042803;GO:0055085;path:mmu02010;path:mmu04142	ABC transporters - Mus musculus (mouse);adenyl ribonucleotide binding;ATPase activity;endoplasmic reticulum membrane;hydrolase activity, acting on acid anhydrides, catalyzing transmembrane movement of substances;integral component of organelle membrane;lysosomal membrane;Lysosome - Mus musculus (mouse);P-P-bond-hydrolysis-driven transmembrane transporter activity;peptide transport;protein homodim…
gene:ENSMUSG00000024867	chr19:24294793-24555872	Pip5k1b	2.14034	4.82778	4.79432	4.44515	4.75849	1.14902e-10	D;U	Positive	P1;P60	Vesicle-mediated transport and secretion by cell	Binding;Biosynthesis and Catalytical activity;Cellular component organization or biogenesis;Environmental information processing, response to stimulus and signaling;Localization and transport;Membrane;Metabolism	GO:0005515;GO:0005524;GO:0012505;GO:0016020;GO:0016301;GO:0016310;GO:0016773;GO:0042995;GO:0046488;path:mmu00562;path:mmu04070;path:mmu04144;path:mmu04810;REACT_112621;REACT_132440;REACT_144613;REACT_146100	ATP binding;cell projection;Endocytosis - Mus musculus (mouse);endomembrane system;Inositol phosphate metabolism - Mus musculus (mouse);kinase activity;membrane;Metabolism;phosphatidylinositol metabolic process;Phosphatidylinositol signaling system - Mus musculus (mouse);Phospholipid metabolism;phosphorylation;phosphotransferase activity, alcohol group as acceptor;PI Metabolism;protein binding;Re…
gene:ENSMUSG00000015094	chr2:25399350-25409494	Npdc1	2.28944	3.2036	3.08113	3.02728	3.37469	1.15026e-10	D	Positive	P1	Unclassified	Membrane	GO:0016021	integral component of membrane
gene:ENSMUSG00000020734	chr11:115249168-115267243	Grin2c	8.03352	6.28107	6.37268	6.42564	3.54517	1.16505e-10	B	Positive	E15.5_Ngn3_Het			Singleton	Singleton
gene:ENSMUSG00000026627	chr1:191325911-191350914	Tmem206	1.87596	3.27502	2.81883	2.6233	2.7286	1.21645e-10	D	Positive	P1	Unclassified	Membrane	GO:0016021	integral component of membrane
gene:ENSMUSG00000041842	chr3:84444034-84480429	Fhdc1	2.69362	5.38508	5.54181	5.44902	4.86725	1.25747e-10	D	Positive	P1			Singleton	Singleton
gene:ENSMUSG00000033676	chr7:57590517-57828802	Gabrb3	4.8376	5.97352	5.40795	4.99498	7.30765	1.27788e-10	D;U	Positive	P1;P60	Ion transport and homeostasis;Membrane potential and Ion channels	Adhesion, communication, aggregation and migration;Cell cycle, proliferation, growth and death;Developmental process and reproduction;Environmental information processing, response to stimulus and signaling;Localization and transport;Membrane	GO:0006820;GO:0014070;GO:0030054;GO:0034702;GO:0045211;GO:0055085;GO:0060384;GO:0090102;GO:1901215;path:mmu05033	anion transport;cell junction;cochlea development;innervation;ion channel complex;negative regulation of neuron death;Nicotine addiction - Mus musculus (mouse);postsynaptic membrane;response to organic cyclic compound;transmembrane transport
gene:ENSMUSG00000037217	chrX:20860510-20921004	Syn1	4.38879	6.61026	6.71522	6.8726	7.58078	1.31928e-10	D;U	Positive	P1;P60	Calcium-mediated processing;Vesicle-mediated transport and secretion by cell	Adhesion, communication, aggregation and migration;Binding;Biosynthesis and Catalytical activity;Cellular component organization or biogenesis;Localization and transport;Metabolism;Organelle;System process	GO:0003779;GO:0003824;GO:0005524;GO:0005794;GO:0005829;GO:0007269;GO:0008021;GO:0008152;GO:0030054;GO:0030425;GO:0048306	actin binding;ATP binding;calcium-dependent protein binding;catalytic activity;cell junction;cytosol;dendrite;Golgi apparatus;metabolic process;neurotransmitter secretion;synaptic vesicle
gene:ENSMUSG00000026475	chr1:153740348-153745468	Rgs16	5.46267	5.66049	6.58778	5.54081	4.60446	1.34509e-10	A;D;O	Positive	E15.5_Ngn3_Het;P1;P12	GTPase and G-protein activity	Biosynthesis and Catalytical activity;Cellular component organization or biogenesis;Environmental information processing, response to stimulus and signaling;Membrane	GO:0007186;GO:0016020;GO:0043547;GO:0045744;GO:0071944	cell periphery;G-protein coupled receptor signaling pathway;membrane;negative regulation of G-protein coupled receptor protein signaling pathway;positive regulation of GTPase activity
gene:ENSMUSG00000049148	chr15:4375490-4575553	Plcxd3	6.46638	7.97903	7.47383	7.10887	5.48806	1.35959e-10	A;D	Positive	E15.5_Ngn3_Het;P1	Unclassified	Biosynthesis and Catalytical activity;Metabolism	GO:0016788;GO:0044710	hydrolase activity, acting on ester bonds;single-organism metabolic process
gene:ENSMUSG00000006546	chr1:74889933-74893143	Cryba2	6.59465	7.20624	5.72514	4.84396	3.36048	1.3798e-10	E	Positive	P1	Unclassified	Binding	GO:0042803	protein homodimerization activity
gene:ENSMUSG00000034714	chr11:114675430-114720977	Ttyh2	2.23861	3.19994	3.52217	3.42928	3.10308	1.43465e-10	D	Positive	P1	Ion transport and homeostasis;Membrane potential and Ion channels	Binding;Localization and transport;Membrane	GO:0005216;GO:0005515;GO:0005886;GO:0008509;GO:0015698;GO:0034702;GO:0098660	anion transmembrane transporter activity;inorganic anion transport;inorganic ion transmembrane transport;ion channel activity;ion channel complex;plasma membrane;protein binding
gene:ENSMUSG00000053519	chr11:33629338-33993152	Kcnip1	3.57576	6.97558	7.0416	6.68761	8.2594	1.50064e-10	D;U	Positive	P1;P60	Calcium-mediated processing;Ion transport and homeostasis;Membrane potential and Ion channels	Binding;Biological regulation and behavior;Cellular component organization or biogenesis;Environmental information processing, response to stimulus and signaling;Localization and transport;Membrane;System process	GO:0005244;GO:0005261;GO:0005509;GO:0005886;GO:0007165;GO:0015079;GO:0030425;GO:0031012;GO:0034703;GO:0034765;GO:0043025;GO:0044325;GO:0044421;GO:0046982;GO:0047485;GO:0071805;GO:0098900	calcium ion binding;cation channel activity;cation channel complex;dendrite;extracellular matrix;extracellular region part;ion channel binding;neuronal cell body;plasma membrane;potassium ion transmembrane transport;potassium ion transmembrane transporter activity;protein heterodimerization activity;protein N-terminus binding;regulation of action potential;regulation of ion transmembrane transpor…
gene:ENSMUSG00000043719	chr9:105689416-105828085	Col6a6	2.25753	6.36133	6.15299	6.0078	4.45886	1.5132e-10	D	Positive	P1	Unclassified	Adhesion, communication, aggregation and migration;Cellular component organization or biogenesis	GO:0005578;GO:0007155;GO:0043234;path:mmu04510	cell adhesion;Focal adhesion - Mus musculus (mouse);protein complex;proteinaceous extracellular matrix
gene:ENSMUSG00000036913	chr8:124793018-124834713	Trim67	6.43048	8.42545	8.1584	6.3112	5.9392	1.57909e-10	D	Positive	P1	GTPase and G-protein activity	Binding;Biological regulation and behavior;Cellular component organization or biogenesis;Developmental process and reproduction;Environmental information processing, response to stimulus and signaling;Metabolism	GO:0005622;GO:0031331;GO:0031344;GO:0032270;GO:0046578;GO:0046914;GO:0048523;GO:0048585;GO:0050767	intracellular;negative regulation of cellular process;negative regulation of response to stimulus;positive regulation of cellular catabolic process;positive regulation of cellular protein metabolic process;regulation of cell projection organization;regulation of neurogenesis;regulation of Ras protein signal transduction;transition metal ion binding
gene:ENSMUSG00000035891	chr15:86139127-86186141	Cerk	1.23263	3.7639	4.14586	4.12212	4.27541	1.62443e-10	D;U	Positive	P1;P60	GTPase and G-protein activity	Binding;Biosynthesis and Catalytical activity;Cellular component organization or biogenesis;Environmental information processing, response to stimulus and signaling;Genetic Information process;Membrane;Metabolism	GO:0000287;GO:0003951;GO:0004143;GO:0005524;GO:0005634;GO:0005739;GO:0007205;GO:0016021;GO:0016310;GO:0044255;GO:1901564;REACT_112621;REACT_93157	ATP binding;cellular lipid metabolic process;diacylglycerol kinase activity;integral component of membrane;magnesium ion binding;Metabolism;Metabolism of lipids and lipoproteins;mitochondrion;NAD+ kinase activity;nucleus;organonitrogen compound metabolic process;phosphorylation;protein kinase C-activating G-protein coupled receptor signaling pathway
gene:ENSMUSG00000061601	chr5:14514917-14860184	Pclo	1.75341	3.00542	2.7816	2.72982	1.6775	1.65468e-10	D;O	Positive	P1;P12	Calcium-mediated processing;Vesicle-mediated transport and secretion by cell	Adhesion, communication, aggregation and migration;Binding;Biological regulation and behavior;Biosynthesis and Catalytical activity;Environmental information processing, response to stimulus and signaling;Localization and transport;Metabolism;Organelle	GO:0003824;GO:0005509;GO:0005515;GO:0006996;GO:0008104;GO:0015833;GO:0016192;GO:0030054;GO:0035556;GO:0043168;GO:0044710;GO:0045202;GO:0046903;GO:0051648;GO:0051656;GO:0060341;GO:0065008	anion binding;calcium ion binding;catalytic activity;cell junction;establishment of organelle localization;intracellular signal transduction;organelle organization;peptide transport;protein binding;protein localization;regulation of biological quality;regulation of cellular localization;secretion;single-organism metabolic process;synapse;vesicle-mediated transport;vesicle localization
gene:ENSMUSG00000042631	chr2:153031851-153055775	Xkr7	6.21761	7.65007	7.25951	6.72885	6.40082	1.73765e-10	D	Positive	P1	Unclassified	Membrane	GO:0016021	integral component of membrane
gene:ENSMUSG00000059654	chr6:78425982-78428666	Reg1	-1.93015	-2.78689	3.69283	6.14056	-2.97205	1.75132e-10	R	Positive	P12			Singleton	Singleton
gene:ENSMUSG00000042249	chr5:112910477-113015514	Adrbk2	1.75757	2.87463	2.66941	2.55923	1.89062	1.85021e-10	A;D	Positive	E15.5_Ngn3_Het;P1	GTPase and G-protein activity;Protein tyrosine and serine/threonine kinase activity;Vesicle-mediated transport and secretion by cell	Binding;Biosynthesis and Catalytical activity;Environmental information processing, response to stimulus and signaling;Localization and transport;Metabolism	GO:0004674;GO:0004713;GO:0005524;GO:0006468;GO:0006898;GO:0045744	ATP binding;negative regulation of G-protein coupled receptor protein signaling pathway;protein phosphorylation;protein serine/threonine kinase activity;protein tyrosine kinase activity;receptor-mediated endocytosis
gene:ENSMUSG00000035713	chr7:97309379-97332020	Usp35	3.43635	4.85612	5.18546	4.93823	5.16123	1.902e-10	D;U	Positive	P1;P60	Unclassified	Biosynthesis and Catalytical activity;Metabolism	GO:0006464;GO:0006511;GO:0019783;GO:0036459	cellular protein modification process;ubiquitin-dependent protein catabolic process;ubiquitin-like protein-specific protease activity;ubiquitinyl hydrolase activity
gene:ENSMUSG00000039485	chr10:34297420-34301308	Tspyl4	2.54202	3.59941	3.84678	4.05411	4.78213	1.98734e-10	D;U	Positive	P1;P60	Unclassified	Cellular component organization or biogenesis;Genetic Information process	GO:0005634;GO:0006323;GO:0006333;GO:0006461;GO:0034622	cellular macromolecular complex assembly;chromatin assembly or disassembly;DNA packaging;nucleus;protein complex assembly
gene:ENSMUSG00000063646	chr5:37028334-37148001	Jakmip1	3.68428	6.36269	6.76724	7.39746	7.19907	2.01719e-10	D	Positive	P1	Unclassified	Binding;Cellular component organization or biogenesis;Genetic Information process;Localization and transport;Membrane	GO:0005102;GO:0005737;GO:0005874;GO:0015031;GO:0015631;GO:0019898;GO:0019899;GO:0030529;GO:0032403;GO:0044707	cytoplasm;enzyme binding;extrinsic component of membrane;microtubule;protein complex binding;protein transport;receptor binding;ribonucleoprotein complex;single-multicellular organism process;tubulin binding
gene:ENSMUSG00000026930	chr2:26315514-26348237	Gpsm1	1.81572	3.00147	2.97092	3.33363	2.94312	2.06261e-10	D;O	Positive	P1;P12	GTPase and G-protein activity	Binding;Biological regulation and behavior;Biosynthesis and Catalytical activity;Cellular component organization or biogenesis;Developmental process and reproduction;Environmental information processing, response to stimulus and signaling;Genetic Information process;Localization and transport;Membrane;Organelle	GO:0005083;GO:0005515;GO:0005634;GO:0005829;GO:0005886;GO:0008277;GO:0030154;GO:0042175;GO:0044431;GO:0044432;GO:0044707;GO:0065009;GO:0098588;path:mmu05030	bounding membrane of organelle;cell differentiation;Cocaine addiction - Mus musculus (mouse);cytosol;endoplasmic reticulum part;Golgi apparatus part;nuclear outer membrane-endoplasmic reticulum membrane network;nucleus;plasma membrane;protein binding;regulation of G-protein coupled receptor protein signaling pathway;regulation of molecular function;single-multicellular organism process;small GTPa…
gene:ENSMUSG00000044164	chr13:43615709-43670945	Rnf182	0.666667	7.23022	8.25365	9.39052	8.00962	2.09016e-10	D;F;O;P	Positive	P1;P12	Unclassified	Binding;Biosynthesis and Catalytical activity;Cellular component organization or biogenesis;Immune system;Membrane;Metabolism	GO:0003824;GO:0005515;GO:0005737;GO:0008152;GO:0008270;GO:0016021;REACT_107772	catalytic activity;cytoplasm;Immune System;integral component of membrane;metabolic process;protein binding;zinc ion binding
gene:ENSMUSG00000027495	chr2:172345564-172355749	Fam210b	0.613842	2.4983	3.48806	3.89222	3.31522	2.21514e-10	O	Positive	P12			Singleton	Singleton
gene:ENSMUSG00000004040	chr11:100885097-100939540	Stat3	1.58254	3.06684	2.33994	2.46797	2.1637	2.26901e-10	D	Positive	P1	Glycolysis, Glucose processing, Pyruvate metabolism and TCA cycle;GTPase and G-protein activity;Protein tyrosine and serine/threonine kinase activity	Adhesion, communication, aggregation and migration;Binding;Biological regulation and behavior;Biosynthesis and Catalytical activity;Cell cycle, proliferation, growth and death;Cellular component organization or biogenesis;Developmental process and reproduction;Disease;Environmental information processing, response to stimulus and signaling;Genetic Information process;Immune system;Localization an…	GO:0001664;GO:0005739;GO:0005829;GO:0006605;GO:0006913;GO:0006954;GO:0008283;GO:0009653;GO:0009895;GO:0010557;GO:0010628;GO:0010675;GO:0014070;GO:0016310;GO:0019221;GO:0019901;GO:0023056;GO:0030336;GO:0031328;GO:0031329;GO:0031975;GO:0033993;GO:0034504;GO:0042127;GO:0042593;GO:0042755;GO:0043467;GO:0044249;GO:0044428;GO:0045595;GO:0046872;GO:0046983;GO:0048638;GO:0048864;GO:0051093;GO:0051254;GO:…	Acute myeloid leukemia - Mus musculus (mouse);anatomical structure morphogenesis;cell proliferation;cellular biosynthetic process;Chemokine signaling pathway - Mus musculus (mouse);cytokine-mediated signaling pathway;Cytokine Signaling in Immune system;cytosol;eating behavior;envelope;establishment of protein localization to organelle;G-protein coupled receptor binding;glucose homeostasis;Hepatit…
gene:ENSMUSG00000027612	chr2:155775341-155818366	Mmp24	5.89422	7.83242	7.79827	7.42236	6.30131	2.28357e-10	A;D	Positive	E15.5_Ngn3_Het;P1	Calcium-mediated processing	Binding;Biosynthesis and Catalytical activity;Cellular component organization or biogenesis;Membrane;Metabolism;Organelle	GO:0004175;GO:0005509;GO:0005578;GO:0005887;GO:0006508;GO:0008237;GO:0008270;GO:0070062	calcium ion binding;endopeptidase activity;extracellular vesicular exosome;integral component of plasma membrane;metallopeptidase activity;proteinaceous extracellular matrix;proteolysis;zinc ion binding
gene:ENSMUSG00000036760	chr15:72512118-72546279	Kcnk9	4.87657	10.7805	9.60736	7.11182	3.71545	2.29036e-10	E	Positive	P1			Singleton	Singleton
gene:ENSMUSG00000022661	chr16:45382134-45409053	Cd200	2.94071	3.40067	4.02705	3.13072	4.67693	2.49051e-10	U	Positive	P60			Singleton	Singleton
gene:ENSMUSG00000042763	chr4:124855238-124862171	Maneal	4.83157	6.94589	6.84877	6.65132	7.21815	2.67048e-10	D	Positive	P1	Unclassified	Biosynthesis and Catalytical activity;Membrane;Metabolism	GO:0000139;GO:0003824;GO:0008152;GO:0016021	catalytic activity;Golgi membrane;integral component of membrane;metabolic process
gene:ENSMUSG00000033209	chr5:110879802-111289780	Ttc28	1.27223	2.89952	2.62835	2.64377	2.57196	2.68751e-10	D	Positive	P1	Unclassified	Binding;Cell cycle, proliferation, growth and death;Cellular component organization or biogenesis;Organelle	GO:0005515;GO:0005737;GO:0005813;GO:0005819;GO:0007346;GO:0043234;GO:0048285;GO:1902589;GO:1903047	centrosome;cytoplasm;mitotic cell cycle process;organelle fission;protein binding;protein complex;regulation of mitotic cell cycle;single-organism organelle organization;spindle
gene:ENSMUSG00000000214	chr7:142892751-142931128	Th	4.84025	6.62468	7.12648	6.30019	5.50866	2.71136e-10	A;D;U	Positive	E15.5_Ngn3_Het;P1;P60	Glycolysis, Glucose processing, Pyruvate metabolism and TCA cycle;Oxidation-reduction and Oxygen-mediated activity;Oxoacid metabolic process and Fatty acid activity;Vesicle-mediated transport and secretion by cell	Adhesion, communication, aggregation and migration;Binding;Biological regulation and behavior;Biosynthesis and Catalytical activity;Cellular component organization or biogenesis;Developmental process and reproduction;Environmental information processing, response to stimulus and signaling;Genetic Information process;Localization and transport;Membrane;Metabolism;Organelle;System process	GO:0001666;GO:0001754;GO:0004497;GO:0005634;GO:0005739;GO:0005783;GO:0005829;GO:0006665;GO:0006970;GO:0007507;GO:0007601;GO:0007605;GO:0007612;GO:0007613;GO:0007626;GO:0008016;GO:0010038;GO:0016597;GO:0019904;GO:0019953;GO:0021987;GO:0030425;GO:0030659;GO:0032355;GO:0032496;GO:0032787;GO:0034641;GO:0035094;GO:0035176;GO:0042136;GO:0042417;GO:0042423;GO:0042461;GO:0042493;GO:0042755;GO:0043195;GO:…	Alcoholism - Mus musculus (mouse);alpha-amino acid metabolic process;amino acid binding;ammonium ion binding;Amphetamine addiction - Mus musculus (mouse);bounding membrane of organelle;camera-type eye morphogenesis;catecholamine biosynthetic process;cellular nitrogen compound metabolic process;cellular response to glucose stimulus;cellular response to organic cyclic compound;cellular response to …
gene:ENSMUSG00000029153	chr5:73322198-73338947	Ociad2	1.46183	3.33608	2.93005	3.51747	2.27396	2.79722e-10	D;O	Positive	P1;P12	Unclassified	Membrane;Organelle	GO:0005743;GO:0005768	endosome;mitochondrial inner membrane
gene:ENSMUSG00000024897	chr19:23758875-23949597	Apba1	3.92999	5.07635	5.25968	5.42146	5.83218	2.84668e-10	A;D;U	Positive	E15.5_Ngn3_Het;P1;P60	Ion transport and homeostasis	Adhesion, communication, aggregation and migration;Binding;Biological regulation and behavior;Cell cycle, proliferation, growth and death;Cellular component organization or biogenesis;Developmental process and reproduction;Genetic Information process;Localization and transport;Membrane;Organelle	GO:0001540;GO:0005543;GO:0005634;GO:0005794;GO:0005886;GO:0006865;GO:0006886;GO:0007268;GO:0007626;GO:0010468;GO:0030165;GO:0032403;GO:0035264;GO:0043009;GO:0043234;GO:0046903;GO:0048471	amino acid transport;beta-amyloid binding;chordate embryonic development;Golgi apparatus;intracellular protein transport;locomotory behavior;multicellular organism growth;nucleus;PDZ domain binding;perinuclear region of cytoplasm;phospholipid binding;plasma membrane;protein complex;protein complex binding;regulation of gene expression;secretion;synaptic transmission
gene:ENSMUSG00000024304	chr18:16588876-16809246	Cdh2	1.91625	4.18672	3.83549	3.64876	3.18946	2.93239e-10	D;O	Positive	P1;P12	Unclassified	Adhesion, communication, aggregation and migration;Binding;Cellular component organization or biogenesis;Developmental process and reproduction;Disease;Environmental information processing, response to stimulus and signaling;Membrane;Metabolism;Organelle	GO:0001568;GO:0005912;GO:0007156;GO:0007157;GO:0009653;GO:0016021;GO:0016324;GO:0019898;GO:0019902;GO:0030178;GO:0031252;GO:0042327;GO:0042995;GO:0043234;GO:0043408;GO:0045202;GO:0046872;GO:0048870;GO:0070062;GO:1902533;path:mmu05412	adherens junction;anatomical structure morphogenesis;apical plasma membrane;Arrhythmogenic right ventricular cardiomyopathy (ARVC) - Mus musculus (mouse);blood vessel development;cell leading edge;cell motility;cell projection;extracellular vesicular exosome;extrinsic component of membrane;heterophilic cell-cell adhesion via plasma membrane cell adhesion molecules;homophilic cell adhesion via pla…
gene:ENSMUSG00000020262	chr10:77290725-77418270	Adarb1	2.111	4.3307	4.15971	4.1471	3.52021	2.98092e-10	D;O	Positive	P1;P12	Unclassified	Adhesion, communication, aggregation and migration;Binding;Biological regulation and behavior;Biosynthesis and Catalytical activity;Cell cycle, proliferation, growth and death;Genetic Information process;Metabolism	GO:0001932;GO:0005515;GO:0005730;GO:0008285;GO:0010467;GO:0030336;GO:0031400;GO:0034641;GO:0042326;GO:0043549;GO:0044822;GO:0046872;GO:0048522;GO:0051348	cellular nitrogen compound metabolic process;gene expression;metal ion binding;negative regulation of cell migration;negative regulation of cell proliferation;negative regulation of phosphorylation;negative regulation of protein modification process;negative regulation of transferase activity;nucleolus;poly(A) RNA binding;positive regulation of cellular process;protein binding;regulation of kinas…
gene:ENSMUSG00000013921	chr7:30291671-30308367	Clip3	3.99323	4.57123	4.11544	3.72172	3.26925	3.06173e-10	A;D	Positive	E15.5_Ngn3_Het;P1	Vesicle-mediated transport and secretion by cell	Binding;Biological regulation and behavior;Biosynthesis and Catalytical activity;Cell cycle, proliferation, growth and death;Cellular component organization or biogenesis;Developmental process and reproduction;Localization and transport;Membrane;Metabolism;Organelle	GO:0001934;GO:0005515;GO:0005794;GO:0006464;GO:0030100;GO:0031110;GO:0031901;GO:0032271;GO:0032880;GO:0034645;GO:0042981;GO:0048523;GO:0048869;GO:0071944	cell periphery;cellular developmental process;cellular macromolecule biosynthetic process;cellular protein modification process;early endosome membrane;Golgi apparatus;negative regulation of cellular process;positive regulation of protein phosphorylation;protein binding;regulation of apoptotic process;regulation of endocytosis;regulation of microtubule polymerization or depolymerization;regulatio…
gene:ENSMUSG00000039470	chr8:40423814-40510268	Zdhhc2	1.03161	3.13567	2.73649	2.54679	2.7513	3.10213e-10	D;U	Positive	P1;P60	Unclassified	Binding;Biosynthesis and Catalytical activity;Developmental process and reproduction;Environmental information processing, response to stimulus and signaling;Membrane;Organelle	GO:0004872;GO:0005783;GO:0005794;GO:0005887;GO:0007275;GO:0008270;GO:0016747;GO:0034645;GO:0055037;GO:0098588	bounding membrane of organelle;cellular macromolecule biosynthetic process;endoplasmic reticulum;Golgi apparatus;integral component of plasma membrane;multicellular organismal development;receptor activity;recycling endosome;transferase activity, transferring acyl groups other than amino-acyl groups;zinc ion binding
gene:ENSMUSG00000083282	chr19:4855128-4860912	Ctsf	2.92016	3.53381	2.90369	2.50351	1.98057	3.10931e-10	L	Positive	P4	Unclassified	Biosynthesis and Catalytical activity	GO:0070011	peptidase activity, acting on L-amino acid peptides
gene:ENSMUSG00000050473	chr10:19847916-19851459	Slc35d3	5.184	5.75777	6.54134	6.18943	5.7436	3.11292e-10	A;D	Positive	E15.5_Ngn3_Het;P1	Unclassified	Localization and transport;Membrane	GO:0016021;GO:0051179	integral component of membrane;localization
gene:ENSMUSG00000024261	chr18:31437807-31447415	Syt4	3.33931	6.76991	7.07399	8.68281	10.8029	3.20575e-10	U	Positive	P60	Calcium-mediated processing;Vesicle-mediated transport and secretion by cell	Adhesion, communication, aggregation and migration;Binding;Biological regulation and behavior;Cellular component organization or biogenesis;Localization and transport;Membrane;Organelle	GO:0005509;GO:0007267;GO:0008021;GO:0016021;GO:0016192;GO:0030054;GO:0032940;GO:0033043;GO:0044433;GO:0048471;GO:0065008;GO:0097479;GO:0098588;GO:1903530	bounding membrane of organelle;calcium ion binding;cell-cell signaling;cell junction;cytoplasmic vesicle part;integral component of membrane;perinuclear region of cytoplasm;regulation of biological quality;regulation of organelle organization;regulation of secretion by cell;secretion by cell;synaptic vesicle;synaptic vesicle localization;vesicle-mediated transport
gene:ENSMUSG00000051209	chrX:48667978-48674478	Gpr119	7.9275	9.05277	8.12533	7.82179	8.81399	3.21531e-10	A;D	Positive	E15.5_Ngn3_Het;P1	GTPase and G-protein activity;Insulin processing and signaling	Binding;Environmental information processing, response to stimulus and signaling;Localization and transport;Membrane	GO:0004930;GO:0007186;GO:0008289;GO:0030073;GO:0031224;GO:0043178;GO:0043235;GO:0070405	alcohol binding;ammonium ion binding;G-protein coupled receptor activity;G-protein coupled receptor signaling pathway;insulin secretion;intrinsic component of membrane;lipid binding;receptor complex
gene:ENSMUSG00000058881	chr18:82910878-83005314	Zfp516	1.79315	2.58983	2.61686	2.5316	1.71326	3.30776e-10	D	Positive	P1	Unclassified	Biosynthesis and Catalytical activity;Genetic Information process;Metabolism	GO:0003677;GO:0005634;GO:0010467;GO:0034645;GO:0051171;GO:0097659;GO:2000112	cellular macromolecule biosynthetic process;DNA binding;gene expression;nucleic acid-templated transcription;nucleus;regulation of cellular macromolecule biosynthetic process;regulation of nitrogen compound metabolic process
gene:ENSMUSG00000042943	chr3:154664095-154757527	4922501L14Rik	5.97894	8.3504	9.28283	8.80917	9.05749	3.31197e-10	D	Positive	P1			Singleton	Singleton
gene:ENSMUSG00000023387	chr14:20262755-20269162	Kcnk16	2.29281	3.02665	2.92402	2.08192	1.1951	3.32964e-10	D;L	Positive	P1;P4	Ion transport and homeostasis	Localization and transport	GO:0015077;GO:0015672;GO:0030001;GO:0098662	inorganic cation transmembrane transport;metal ion transport;monovalent inorganic cation transmembrane transporter activity;monovalent inorganic cation transport
gene:ENSMUSG00000033880	chr11:118392750-118402092	Lgals3bp	1.12203	2.59244	2.56611	2.53228	2.82404	3.51965e-10	D;U	Positive	P1;P60	Vesicle-mediated transport and secretion by cell	Adhesion, communication, aggregation and migration;Binding;Cellular component organization or biogenesis;Environmental information processing, response to stimulus and signaling;Localization and transport;Membrane;Organelle	GO:0004872;GO:0005515;GO:0007155;GO:0016020;GO:0016192;GO:0031012;GO:0070062;GO:0072562	blood microparticle;cell adhesion;extracellular matrix;extracellular vesicular exosome;membrane;protein binding;receptor activity;vesicle-mediated transport
gene:ENSMUSG00000043621	chr4:138709836-138737167	Ubxn10	2.42528	4.1259	4.41402	4.37668	3.55089	3.55813e-10	D	Positive	P1	Unclassified	Binding	GO:0005515	protein binding
gene:ENSMUSG00000036053	chr2:52857859-53134202	Fmnl2	1.56348	3.24637	2.93243	2.95389	1.6686	3.60008e-10	D	Positive	P1	Unclassified	Binding;Cellular component organization or biogenesis;Developmental process and reproduction	GO:0003779;GO:0005737;GO:0019899;GO:0022604;GO:0030036	actin binding;actin cytoskeleton organization;cytoplasm;enzyme binding;regulation of cell morphogenesis
gene:ENSMUSG00000001566	chr5:29473037-29478519	Mnx1	3.80636	4.75948	5.38101	5.33524	4.688	3.61049e-10	A;D	Positive	E15.5_Ngn3_Het;P1	Insulin processing and signaling	Adhesion, communication, aggregation and migration;Developmental process and reproduction;Disease;Genetic Information process	GO:0001764;GO:0003700;GO:0005634;GO:0006351;GO:0006355;GO:0007411;GO:0007517;GO:0021520;GO:0031018;GO:0043009;GO:0043565;path:mmu04950	axon guidance;chordate embryonic development;endocrine pancreas development;Maturity onset diabetes of the young - Mus musculus (mouse);muscle organ development;neuron migration;nucleus;regulation of transcription, DNA-templated;sequence-specific DNA binding;sequence-specific DNA binding transcription factor activity;spinal cord motor neuron cell fate specification;transcription, DNA-templated
gene:ENSMUSG00000086171	chr2:143535475-143547837	C630020P19Rik	7.01805	7.93666	7.65916	7.7721	8.21734	3.82346e-10	A	Positive	E15.5_Ngn3_Het			Singleton	Singleton
gene:ENSMUSG00000028546	chr4:110203721-110351909	Elavl4	4.30329	5.11606	5.89331	5.43042	5.66376	3.89279e-10	A;U	Positive	E15.5_Ngn3_Het;P60	Unclassified	Binding;Genetic Information process	GO:0000166;GO:0003723	nucleotide binding;RNA binding
gene:ENSMUSG00000050947	chr3:108186334-108192286	Amigo1	2.08194	3.07122	3.16901	2.90396	2.83921	3.98495e-10	A;D	Positive	E15.5_Ngn3_Het;P1	Unclassified	Adhesion, communication, aggregation and migration;Binding;Developmental process and reproduction;Membrane	GO:0005515;GO:0005886;GO:0007156;GO:0007157;GO:0007409;GO:0007413;GO:0016021;GO:0042552;GO:0050772	axonal fasciculation;axonogenesis;heterophilic cell-cell adhesion via plasma membrane cell adhesion molecules;homophilic cell adhesion via plasma membrane adhesion molecules;integral component of membrane;myelination;plasma membrane;positive regulation of axonogenesis;protein binding
gene:ENSMUSG00000032578	chr9:107296025-107302784	Cish	-0.239418	2.86975	2.88143	3.693	4.3177	4.02375e-10	D;U	Positive	P1;P60	GTPase and G-protein activity;Protein tyrosine and serine/threonine kinase activity	Binding;Environmental information processing, response to stimulus and signaling;Immune system;Metabolism	GO:0005515;GO:0007205;GO:0009968;GO:0016567;GO:0035556;GO:0044464;path:mmu04630;path:mmu04917;REACT_107772;REACT_91328	cell part;Cytokine Signaling in Immune system;Immune System;intracellular signal transduction;Jak-STAT signaling pathway - Mus musculus (mouse);negative regulation of signal transduction;Prolactin signaling pathway - Mus musculus (mouse);protein binding;protein kinase C-activating G-protein coupled receptor signaling pathway;protein ubiquitination
gene:ENSMUSG00000038296	chr7:111471660-111779977	Galnt18	1.9098	4.57554	4.31282	4.16745	2.76568	4.08201e-10	D	Positive	P1	Unclassified	Binding;Biosynthesis and Catalytical activity;Membrane;Metabolism;Organelle	GO:0016021;GO:0016740;GO:0034645;GO:0044267;GO:0044431;GO:0044723;GO:0046872;GO:0098588;GO:1901137	bounding membrane of organelle;carbohydrate derivative biosynthetic process;cellular macromolecule biosynthetic process;cellular protein metabolic process;Golgi apparatus part;integral component of membrane;metal ion binding;single-organism carbohydrate metabolic process;transferase activity
gene:ENSMUSG00000022098	chr14:70474556-70520260	Bmp1	1.66512	3.04127	2.53454	2.22317	1.39473	4.09512e-10	D	Positive	P1	Calcium-mediated processing	Binding;Biosynthesis and Catalytical activity;Cellular component organization or biogenesis;Developmental process and reproduction;Organelle	GO:0003824;GO:0005509;GO:0005515;GO:0030154;GO:0043231;GO:0046914;GO:0061036;REACT_131142	calcium ion binding;catalytic activity;cell differentiation;Extracellular matrix organization;intracellular membrane-bounded organelle;positive regulation of cartilage development;protein binding;transition metal ion binding
gene:ENSMUSG00000052951	chr2:33641192-33646354	C130021I20Rik	9.05061	8.21343	7.88464	6.82075	4.95756	4.54073e-10	A	Positive	E15.5_Ngn3_Het			Singleton	Singleton
gene:ENSMUSG00000022208	chr14:55106829-55116935	Jph4	5.04969	6.47904	6.59089	5.69672	3.89881	4.59006e-10	D;O	Positive	P1;P12	Unclassified	Biological regulation and behavior;Cellular component organization or biogenesis;Localization and transport;Membrane;Organelle;System process	GO:0005886;GO:0012505;GO:0016021;GO:0043198;GO:0043231;GO:0044444;GO:0044699;GO:0048167	cytoplasmic part;dendritic shaft;endomembrane system;integral component of membrane;intracellular membrane-bounded organelle;plasma membrane;regulation of synaptic plasticity;single-organism process
gene:ENSMUSG00000058488	chr5:150952606-150993809	Kl	2.47134	7.31628	6.39785	5.55926	6.57058	4.66307e-10	D	Positive	P1	Calcium-mediated processing;Insulin processing and signaling;Ion transport and homeostasis;Oxidation-reduction and Oxygen-mediated activity;Protein tyrosine and serine/threonine kinase activity	Binding;Biological regulation and behavior;Biosynthesis and Catalytical activity;Developmental process and reproduction;Disease;Environmental information processing, response to stimulus and signaling;Immune system;Localization and transport;Membrane;Metabolism;Organelle	GO:0002526;GO:0003824;GO:0005886;GO:0008286;GO:0015980;GO:0031224;GO:0042327;GO:0043408;GO:0051094;GO:0051240;GO:0055074;GO:0070062;GO:0070851;GO:1902533;GO:2000026;path:mmu04961;REACT_100635;REACT_101230;REACT_105552;REACT_115202;REACT_118233;REACT_118324;REACT_118380;REACT_134669;REACT_135572;REACT_148808;REACT_150083;REACT_29949;REACT_78158;REACT_80348	acute inflammatory response;calcium ion homeostasis;catalytic activity;DAP12 interactions;DAP12 signaling;Disease;Downstream signal transduction;Downstream signaling of activated FGFR;Endocrine and other factor-regulated calcium reabsorption - Mus musculus (mouse);energy derivation by oxidation of organic compounds;extracellular vesicular exosome;growth factor receptor binding;insulin receptor si…
gene:ENSMUSG00000092274	chr19:5824707-5845478	Neat1	1.13901	2.49173	2.01578	3.03791	4.85277	4.66747e-10	U	Positive	P60			Singleton	Singleton
gene:ENSMUSG00000055197	chr1:74881508-74885419	Fev	9.42411	7.92633	7.32826	5.8444	0.578989	4.68326e-10	B	Positive	E15.5_Ngn3_Het			Singleton	Singleton
gene:ENSMUSG00000020312	chr10:79617939-79637918	Shc2	3.75465	4.17836	4.18065	4.31912	3.80287	4.70335e-10	A;D	Positive	E15.5_Ngn3_Het;P1	GTPase and G-protein activity;Insulin processing and signaling;Protein tyrosine and serine/threonine kinase activity	Binding;Disease;Environmental information processing, response to stimulus and signaling	GO:0005515;GO:0007165;path:mmu04012;path:mmu04014;path:mmu04062;path:mmu04722;path:mmu04910;path:mmu04915;path:mmu04917;path:mmu05034;path:mmu05214;REACT_115202	Alcoholism - Mus musculus (mouse);Chemokine signaling pathway - Mus musculus (mouse);ErbB signaling pathway - Mus musculus (mouse);Estrogen signaling pathway - Mus musculus (mouse);Glioma - Mus musculus (mouse);Insulin signaling pathway - Mus musculus (mouse);Neurotrophin signaling pathway - Mus musculus (mouse);Prolactin signaling pathway - Mus musculus (mouse);protein binding;Ras signaling path…
gene:ENSMUSG00000069814	chr11:74619604-74641516	E130309D14Rik	3.7712	5.95914	5.7274	5.78067	6.01827	4.79099e-10	D	Positive	P1			Singleton	Singleton
gene:ENSMUSG00000034785	chr4:107291464-107307169	Dio1	3.34813	7.19318	7.77652	9.20032	8.06443	4.91291e-10	D;O;U	Positive	P1;P12;P60	Oxidation-reduction and Oxygen-mediated activity	Biosynthesis and Catalytical activity;Membrane;Metabolism	GO:0003824;GO:0005789;GO:0016021;GO:0042445;GO:0055114;REACT_112621	catalytic activity;endoplasmic reticulum membrane;hormone metabolic process;integral component of membrane;Metabolism;oxidation-reduction process
gene:ENSMUSG00000030256	chr6:145858242-145865558	Bhlhe41	2.62994	6.09528	6.66158	6.78781	6.67805	4.94231e-10	D;U	Positive	P1;P60	Unclassified	Binding;Biological regulation and behavior;Cellular component organization or biogenesis;Developmental process and reproduction;Genetic Information process	GO:0000978;GO:0001085;GO:0003700;GO:0003712;GO:0005654;GO:0006357;GO:0006366;GO:0032922;GO:0033613;GO:0042803;GO:0042826;GO:0043234;GO:0045596;GO:0045892;GO:0046982;path:mmu04710	activating transcription factor binding;circadian regulation of gene expression;Circadian rhythm - Mus musculus (mouse);histone deacetylase binding;negative regulation of cell differentiation;negative regulation of transcription, DNA-templated;nucleoplasm;protein complex;protein heterodimerization activity;protein homodimerization activity;regulation of transcription from RNA polymerase II promot…
gene:ENSMUSG00000057058	chr11:96464592-96759130	Skap1	3.30867	6.16841	7.19354	7.46979	7.01389	4.94723e-10	D	Positive	P1	Unclassified	Adhesion, communication, aggregation and migration;Binding;Cellular component organization or biogenesis;Genetic Information process;Immune system;Membrane	GO:0002429;GO:0005634;GO:0005737;GO:0005886;GO:0019901;GO:0019902;GO:0019904;GO:0030054;GO:0032403;GO:0045944	cell junction;cytoplasm;immune response-activating cell surface receptor signaling pathway;nucleus;phosphatase binding;plasma membrane;positive regulation of transcription from RNA polymerase II promoter;protein complex binding;protein domain specific binding;protein kinase binding
gene:ENSMUSG00000018698	chr11:84518283-84525535	Lhx1	9.03425	8.28233	7.92639	7.66273	7.61374	4.96937e-10	A	Positive	E15.5_Ngn3_Het	Unclassified	Adhesion, communication, aggregation and migration;Binding;Biosynthesis and Catalytical activity;Cell cycle, proliferation, growth and death;Cellular component organization or biogenesis;Developmental process and reproduction;Environmental information processing, response to stimulus and signaling;Genetic Information process	GO:0001764;GO:0003407;GO:0003677;GO:0003700;GO:0003714;GO:0005515;GO:0005634;GO:0007411;GO:0008270;GO:0009952;GO:0010467;GO:0010628;GO:0021515;GO:0021517;GO:0021537;GO:0021549;GO:0030858;GO:0034645;GO:0043009;GO:0043234;GO:0044702;GO:0045892;GO:0048562;GO:0048646;GO:0051960;GO:0071363;GO:0071774;GO:0097659;GO:1902680;GO:2000027;GO:2000179	anatomical structure formation involved in morphogenesis;anterior/posterior pattern specification;axon guidance;cell differentiation in spinal cord;cellular macromolecule biosynthetic process;cellular response to growth factor stimulus;cerebellum development;chordate embryonic development;DNA binding;embryonic organ morphogenesis;gene expression;negative regulation of transcription, DNA-templated…
gene:ENSMUSG00000092286	chr12:3752542-3762146	Gm20448	5.01031	7.58519	6.53751	6.37863	5.46701	5.03466e-10	D	Positive	P1			Singleton	Singleton
gene:ENSMUSG00000020614	chr11:109669748-109722279	Fam20a	1.84794	6.08682	6.60787	6.22488	6.56435	5.0821e-10	D	Positive	P1	Ion transport and homeostasis	Biological regulation and behavior;Developmental process and reproduction;Organelle	GO:0005794;GO:0009888;GO:0042475;GO:0055074;GO:0070062	calcium ion homeostasis;extracellular vesicular exosome;Golgi apparatus;odontogenesis of dentin-containing tooth;tissue development
gene:ENSMUSG00000027765	chr3:61002794-61008979	P2ry1	2.16962	5.7937	3.7511	3.39968	3.44981	5.0875e-10	D	Positive	P1	Ion transport and homeostasis	Adhesion, communication, aggregation and migration;Biological regulation and behavior;Biosynthesis and Catalytical activity;Localization and transport;Metabolism	GO:0010557;GO:0031323;GO:0055074;GO:0072503;GO:0097481;GO:1902580	calcium ion homeostasis;cellular divalent inorganic cation homeostasis;neuronal postsynaptic density;positive regulation of macromolecule biosynthetic process;regulation of cellular metabolic process;single-organism cellular localization
gene:ENSMUSG00000066456	chr9:83109947-83146607	Hmgn3	4.13749	3.67788	3.75736	3.62382	2.81891	5.12137e-10	A	Positive	E15.5_Ngn3_Het	Vesicle-mediated transport and secretion by cell	Adhesion, communication, aggregation and migration;Biological regulation and behavior;Biosynthesis and Catalytical activity;Environmental information processing, response to stimulus and signaling;Genetic Information process;Localization and transport;Organelle	GO:0005634;GO:0010628;GO:0010646;GO:0023051;GO:0043566;GO:0044446;GO:0065009;GO:1902680;GO:1903506;GO:1903530;GO:2000112	intracellular organelle part;nucleus;positive regulation of gene expression;positive regulation of RNA biosynthetic process;regulation of cell communication;regulation of cellular macromolecule biosynthetic process;regulation of molecular function;regulation of nucleic acid-templated transcription;regulation of secretion by cell;regulation of signaling;structure-specific DNA binding
gene:ENSMUSG00000045912	chr10:79606856-79614025	C2cd4c	4.48362	5.28131	5.27553	5.37404	4.63337	5.25741e-10	D	Positive	P1	Unclassified	Binding	GO:0005515	protein binding
gene:ENSMUSG00000022265	chr15:27466676-27594909	Ank	1.42779	2.65376	2.68869	2.56056	1.38368	5.36209e-10	D	Positive	P1	Unclassified	Membrane	GO:0005887	integral component of plasma membrane
gene:ENSMUSG00000075702	chr11:3514683-3517351	Selm	2.79082	3.74482	3.77014	3.79919	4.33403	5.4523e-10	D	Positive	P1	Vesicle-mediated transport and secretion by cell	Cell cycle, proliferation, growth and death;Cellular component organization or biogenesis;Developmental process and reproduction;Environmental information processing, response to stimulus and signaling;Genetic Information process;Localization and transport;Metabolism;Organelle	GO:0005634;GO:0005783;GO:0005794;GO:0008152;GO:0010035;GO:0035264;GO:0046879;GO:0048471;GO:0060612;GO:0071702	adipose tissue development;endoplasmic reticulum;Golgi apparatus;hormone secretion;metabolic process;multicellular organism growth;nucleus;organic substance transport;perinuclear region of cytoplasm;response to inorganic substance
gene:ENSMUSG00000024990	chr19:38116619-38125321	Rbp4	3.8138	3.14848	2.00863	1.38002	-1.09645	5.53086e-10	B	Positive	E15.5_Ngn3_Het			Singleton	Singleton
gene:ENSMUSG00000034677	chr11:114798923-114806745	Gpr142	6.83314	8.38521	7.37758	7.30978	6.53279	5.6871e-10	A;D	Positive	E15.5_Ngn3_Het;P1	GTPase and G-protein activity	Adhesion, communication, aggregation and migration;Cellular component organization or biogenesis;Environmental information processing, response to stimulus and signaling;Membrane	GO:0004930;GO:0007186;GO:0016021;GO:0030054;GO:0044424;GO:0071944	cell junction;cell periphery;G-protein coupled receptor activity;G-protein coupled receptor signaling pathway;integral component of membrane;intracellular part
gene:ENSMUSG00000038248	chr10:43002500-43174530	Sobp	3.19679	5.01154	5.10764	4.88836	4.21239	6.34581e-10	D;O	Positive	P1;P12	Unclassified	Binding;Biological regulation and behavior;Developmental process and reproduction;System process	GO:0007605;GO:0007626;GO:0032182;GO:0042472;GO:0046872	inner ear morphogenesis;locomotory behavior;metal ion binding;sensory perception of sound;ubiquitin-like protein binding
gene:ENSMUSG00000055897	chr2:173579319-173659640	Ppp4r1l-ps	1.34415	2.75979	2.64977	2.61364	1.58222	6.37152e-10	D	Positive	P1			Singleton	Singleton
gene:ENSMUSG00000031600	chr8:40511782-40551134	Vps37a	2.07161	2.3231	2.31171	2.17823	2.06402	6.52116e-10	A;D	Positive	E15.5_Ngn3_Het;P1	Unclassified	Cellular component organization or biogenesis;Genetic Information process;Localization and transport;Membrane;Metabolism	GO:0005634;GO:0005737;GO:0005813;GO:0006508;GO:0012505;GO:0015031;GO:0043234;GO:0044248;GO:0044267;GO:0098588;GO:1901575	bounding membrane of organelle;cellular catabolic process;cellular protein metabolic process;centrosome;cytoplasm;endomembrane system;nucleus;organic substance catabolic process;protein complex;protein transport;proteolysis
gene:ENSMUSG00000038271	chr6:125145240-125161782	Iffo1	2.41404	4.19459	4.33118	4.14537	4.14199	6.54049e-10	D	Positive	P1			Singleton	Singleton
gene:ENSMUSG00000046982	chr18:84011627-84086404	Tshz1	1.20035	2.54467	2.66285	2.59399	1.53805	6.7947e-10	D;O	Positive	P1;P12	Unclassified	Binding;Biosynthesis and Catalytical activity;Developmental process and reproduction;Genetic Information process	GO:0005515;GO:0005634;GO:0010467;GO:0010468;GO:0032774;GO:0034645;GO:0046872;GO:0048598;GO:0090596;GO:1903506;GO:2000112	cellular macromolecule biosynthetic process;embryonic morphogenesis;gene expression;metal ion binding;nucleus;protein binding;regulation of cellular macromolecule biosynthetic process;regulation of gene expression;regulation of nucleic acid-templated transcription;RNA biosynthetic process;sensory organ morphogenesis
gene:ENSMUSG00000020169	chr10:116986313-117025040	Best3	5.4527	8.8661	8.93032	8.14758	8.77088	6.99389e-10	D	Positive	P1	Ion transport and homeostasis;Membrane potential and Ion channels	Localization and transport;Membrane	GO:0005216;GO:0005886;GO:0008509;GO:0015698;GO:0034702;GO:0043271;GO:0098660	anion transmembrane transporter activity;inorganic anion transport;inorganic ion transmembrane transport;ion channel activity;ion channel complex;negative regulation of ion transport;plasma membrane
gene:ENSMUSG00000042388	chr4:127169203-127237022	Dlgap3	2.19021	4.64405	5.07401	4.69578	3.96879	7.11963e-10	D	Positive	P1	Unclassified	Adhesion, communication, aggregation and migration;Binding;Membrane	GO:0005515;GO:0014069;GO:0030054;GO:0042277;GO:0045211	cell junction;peptide binding;postsynaptic density;postsynaptic membrane;protein binding
gene:ENSMUSG00000039860	chr5:135806889-135874772	Srrm3	6.01123	6.58061	6.8112	6.98935	7.14824	7.16028e-10	A	Positive	E15.5_Ngn3_Het			Singleton	Singleton
gene:ENSMUSG00000067219	chr5:72647795-72671078	Nipal1	1.72643	4.70531	3.78707	4.38344	4.3154	7.21692e-10	D;U	Positive	P1;P60	Ion transport and homeostasis	Localization and transport;Membrane	GO:0015095;GO:0015693;GO:0016021	integral component of membrane;magnesium ion transmembrane transporter activity;magnesium ion transport
gene:ENSMUSG00000070498	chr5:125531773-125792583	Tmem132b	2.60476	4.82428	4.67478	5.09647	5.50864	7.26548e-10	D	Positive	P1			Singleton	Singleton
gene:ENSMUSG00000083695	chrX:163760139-163761329	Rnf138rt1	7.27379	7.93613	8.28753	7.66548	7.27625	7.69631e-10	A;D	Positive	E15.5_Ngn3_Het;P1	Unclassified	Binding	GO:0005515;GO:0008270	protein binding;zinc ion binding
gene:ENSMUSG00000061578	chr5:117413999-117775003	Ksr2	2.52141	3.81713	4.16343	3.99419	3.58706	7.79902e-10	D	Positive	P1	Calcium-mediated processing;Protein tyrosine and serine/threonine kinase activity	Binding;Biosynthesis and Catalytical activity;Cellular component organization or biogenesis;Environmental information processing, response to stimulus and signaling;Membrane;Metabolism	GO:0004674;GO:0004713;GO:0005524;GO:0005829;GO:0005886;GO:0006468;GO:0019722;GO:0019901;GO:0043410;GO:0046872	ATP binding;calcium-mediated signaling;cytosol;metal ion binding;plasma membrane;positive regulation of MAPK cascade;protein kinase binding;protein phosphorylation;protein serine/threonine kinase activity;protein tyrosine kinase activity
gene:ENSMUSG00000097225	chr7:61930912-61982356	A330076H08Rik	3.17322	4.98078	5.69329	5.34528	6.67873	8.00736e-10	U	Positive	P60			Singleton	Singleton
gene:ENSMUSG00000053693	chr8:84911902-84937359	Mast1	3.43813	5.73857	5.67173	5.69058	3.83799	8.17064e-10	D	Positive	P1	Protein tyrosine and serine/threonine kinase activity	Binding;Biosynthesis and Catalytical activity;Cellular component organization or biogenesis;Environmental information processing, response to stimulus and signaling;Membrane;Metabolism;Organelle	GO:0000287;GO:0004674;GO:0004713;GO:0005515;GO:0005524;GO:0005737;GO:0005886;GO:0006468;GO:0006996;GO:0035556;GO:0043229	ATP binding;cytoplasm;intracellular organelle;intracellular signal transduction;magnesium ion binding;organelle organization;plasma membrane;protein binding;protein phosphorylation;protein serine/threonine kinase activity;protein tyrosine kinase activity
gene:ENSMUSG00000045838	chr2:118754157-118762661	A430105I19Rik	2.64088	4.41464	4.34581	4.59077	5.08415	8.27736e-10	D	Positive	P1	Unclassified	Genetic Information process	GO:0044822	poly(A) RNA binding
gene:ENSMUSG00000059325	chr5:77086987-77115156	Hopx	2.62735	5.36473	5.34337	5.28441	6.32513	8.82028e-10	D;U	Positive	P1;P60	Unclassified	Binding;Biological regulation and behavior;Cell cycle, proliferation, growth and death;Cellular component organization or biogenesis;Developmental process and reproduction;Environmental information processing, response to stimulus and signaling;Genetic Information process;System process	GO:0001701;GO:0003700;GO:0005515;GO:0005634;GO:0005737;GO:0006351;GO:0006357;GO:0008016;GO:0016570;GO:0030154;GO:0035295;GO:0043565;GO:0045596;GO:0045597;GO:0045892;GO:0048513;GO:0048639;GO:0048646;GO:0061041;GO:0065009;GO:0072358;GO:1903036	anatomical structure formation involved in morphogenesis;cardiovascular system development;cell differentiation;cytoplasm;histone modification;in utero embryonic development;negative regulation of cell differentiation;negative regulation of transcription, DNA-templated;nucleus;organ development;positive regulation of cell differentiation;positive regulation of developmental growth;positive regula…
gene:ENSMUSG00000009246	chr7:143069152-143094642	Trpm5	1.49951	4.90909	3.84841	5.01335	4.87672	8.8214e-10	D;U	Positive	P1;P60	Ion transport and homeostasis;Membrane potential and Ion channels	Localization and transport;Membrane	GO:0005244;GO:0005886;GO:0016021;GO:0022839;GO:0034765;GO:0055085	integral component of membrane;ion gated channel activity;plasma membrane;regulation of ion transmembrane transport;transmembrane transport;voltage-gated ion channel activity
gene:ENSMUSG00000023032	chr15:100761746-100823968	Slc4a8	2.78993	3.4525	3.7252	3.35883	2.87492	8.8925e-10	A;D	Positive	E15.5_Ngn3_Het;P1	Ion transport and homeostasis	Localization and transport;Membrane;System process	GO:0008509;GO:0016021;GO:0030001;GO:0032809;GO:0043005;GO:0055085;REACT_146056	anion transmembrane transporter activity;integral component of membrane;metal ion transport;neuron projection;neuronal cell body membrane;transmembrane transport;Transport of inorganic cations/anions and amino acids/oligopeptides
gene:ENSMUSG00000079262	chr6:142085760-142208521	Slco1a6	3.16395	7.24645	8.71054	8.60698	7.97929	9.07268e-10	D;U	Positive	P1;P60	Oxoacid metabolic process and Fatty acid activity	Binding;Biological regulation and behavior;Developmental process and reproduction;Localization and transport;Membrane;Metabolism	GO:0005515;GO:0005886;GO:0006725;GO:0006805;GO:0016021;GO:0032787;GO:0048513;GO:0051186;GO:0055085;GO:0055088;GO:1901564;GO:1901615;REACT_112621;REACT_93157	cellular aromatic compound metabolic process;cofactor metabolic process;integral component of membrane;lipid homeostasis;Metabolism;Metabolism of lipids and lipoproteins;monocarboxylic acid metabolic process;organ development;organic hydroxy compound metabolic process;organonitrogen compound metabolic process;plasma membrane;protein binding;transmembrane transport;xenobiotic metabolic process
gene:ENSMUSG00000020886	chr11:70017084-70045532	Dlg4	2.51819	3.30971	3.26228	2.86588	2.95769	9.22594e-10	A;D	Positive	E15.5_Ngn3_Het;P1	GTPase and G-protein activity;Ion transport and homeostasis;Membrane potential and Ion channels;Vesicle-mediated transport and secretion by cell	Adhesion, communication, aggregation and migration;Binding;Biological regulation and behavior;Cellular component organization or biogenesis;Developmental process and reproduction;Environmental information processing, response to stimulus and signaling;Localization and transport;Membrane;Metabolism;Organelle;System process	GO:0005783;GO:0005856;GO:0005887;GO:0005938;GO:0006461;GO:0007204;GO:0007416;GO:0007626;GO:0008022;GO:0009719;GO:0010605;GO:0014069;GO:0014070;GO:0016188;GO:0019898;GO:0030054;GO:0030100;GO:0030165;GO:0030424;GO:0030425;GO:0031410;GO:0031690;GO:0032403;GO:0033130;GO:0034702;GO:0035176;GO:0035254;GO:0042043;GO:0043235;GO:0044306;GO:0045211;GO:0048169;GO:0048523;GO:0048813;GO:0050806;GO:0050885;GO:…	acetylcholine receptor binding;adrenergic receptor binding;axon;cell cortex;cell junction;Cocaine addiction - Mus musculus (mouse);cytoplasmic vesicle;cytoskeleton;dendrite;dendrite morphogenesis;endoplasmic reticulum;extrinsic component of membrane;Glutamate Binding, Activation of AMPA Receptors and Synaptic Plasticity;glutamate receptor binding;Glutamatergic synapse - Mus musculus (mouse);integ…
gene:ENSMUSG00000050965	chr11:107933386-108343928	Prkca	1.01361	2.98594	3.15548	2.86193	2.95215	9.24356e-10	D;K;O;U	Positive	P1;P12;P4;P60	Calcium-mediated processing;Glycolysis, Glucose processing, Pyruvate metabolism and TCA cycle;GTPase and G-protein activity;Insulin processing and signaling;Ion transport and homeostasis;Oxidation-reduction and Oxygen-mediated activity;Protein tyrosine and serine/threonine kinase activity;Vesicle-mediated transport and secretion by cell	Adhesion, communication, aggregation and migration;Binding;Biological regulation and behavior;Biosynthesis and Catalytical activity;Cell cycle, proliferation, growth and death;Cellular component organization or biogenesis;Developmental process and reproduction;Disease;Environmental information processing, response to stimulus and signaling;Genetic Information process;Immune system;Localization an…	GO:0001501;GO:0001932;GO:0004697;GO:0004713;GO:0005524;GO:0005739;GO:0005783;GO:0005829;GO:0005886;GO:0005929;GO:0006521;GO:0006874;GO:0006935;GO:0006937;GO:0007043;GO:0007346;GO:0008016;GO:0008270;GO:0008285;GO:0009888;GO:0009967;GO:0010595;GO:0010829;GO:0016572;GO:0018105;GO:0019899;GO:0030425;GO:0031347;GO:0031400;GO:0042326;GO:0042327;GO:0043025;GO:0043066;GO:0043086;GO:0043408;GO:0045765;GO:…	Aldosterone-regulated sodium reabsorption - Mus musculus (mouse);Amoebiasis - Mus musculus (mouse);Amphetamine addiction - Mus musculus (mouse);ATP binding;Ca-dependent events;Calcium signaling pathway - Mus musculus (mouse);Calmodulin induced events;CaM pathway;cell-cell junction assembly;cell motility;cellular calcium ion homeostasis;cellular response to carbohydrate stimulus;chemotaxis;cilium;…
gene:ENSMUSG00000098168	chr1:34236595-34238820	D630036G22Rik	4.55085	4.86936	5.33822	5.65503	6.09109	9.43129e-10	U	Positive	P60			Singleton	Singleton
gene:ENSMUSG00000097767	chr5:112213227-112229395	Miat	7.07174	2.99071	1.811	-1.21076	-6.26434	9.46023e-10	Singleton	Positive	E15.5_Ngn3_Het			Singleton	Singleton
gene:ENSMUSG00000000202	chr11:114791216-114795945	Btbd17	5.68748	4.51468	4.35857	4.03886	3.71194	1.00578e-09	A	Positive	E15.5_Ngn3_Het			Singleton	Singleton
gene:ENSMUSG00000021071	chr12:70244538-70347614	Trim9	7.59817	6.30558	6.38252	6.03648	8.24597	1.04469e-09	A;U	Positive	E15.5_Ngn3_Het;P60	Unclassified	Binding;Biosynthesis and Catalytical activity;Localization and transport;Metabolism	GO:0006464;GO:0016740;GO:0016874;GO:0046872;GO:0051640	cellular protein modification process;ligase activity;metal ion binding;organelle localization;transferase activity
gene:ENSMUSG00000019933	chr10:70204683-70219710	2310015B20Rik	4.94422	6.7823	7.10466	7.69933	7.26831	1.05167e-09	D	Positive	P1			Singleton	Singleton
gene:ENSMUSG00000046378	chr7:126945566-126949582	Asphd1	5.6063	7.12787	7.18904	7.05776	7.26323	1.07777e-09	D	Positive	P1	Oxidation-reduction and Oxygen-mediated activity	Biosynthesis and Catalytical activity;Membrane;Metabolism	GO:0016021;GO:0016491;GO:0018193;GO:0055114	integral component of membrane;oxidation-reduction process;oxidoreductase activity;peptidyl-amino acid modification
gene:ENSMUSG00000040009	chr10:74967176-75016907	Gnaz	2.28838	3.63102	3.83091	3.74291	3.48529	1.0834e-09	A;D	Positive	E15.5_Ngn3_Het;P1	GTPase and G-protein activity	Binding;Biosynthesis and Catalytical activity;Cellular component organization or biogenesis;Environmental information processing, response to stimulus and signaling;Organelle	GO:0003924;GO:0004871;GO:0005102;GO:0005525;GO:0005829;GO:0005834;GO:0007193;GO:0032403;GO:0043087;GO:0046872;GO:0070062;REACT_109465;REACT_115202;REACT_34241;REACT_77799;REACT_90291	adenylate cyclase-inhibiting G-protein coupled receptor signaling pathway;cytosol;extracellular vesicular exosome;G alpha (i) signalling events;G alpha (s) signalling events;GPCR downstream signaling;GTP binding;GTPase activity;heterotrimeric G-protein complex;metal ion binding;protein complex binding;receptor binding;regulation of GTPase activity;signal transducer activity;Signal Transduction;Si…
gene:ENSMUSG00000092083	chr1:15287258-15714295	Kcnb2	7.14263	7.48741	7.20827	6.54359	6.71385	1.16338e-09	A;D	Positive	E15.5_Ngn3_Het;P1	Ion transport and homeostasis;Membrane potential and Ion channels	Binding;Cellular component organization or biogenesis;Localization and transport;System process	GO:0005251;GO:0005515;GO:0008076;GO:0034765;GO:0051260;GO:0071805;REACT_130040;REACT_42352;REACT_86563	delayed rectifier potassium channel activity;Neuronal System;Potassium Channels;potassium ion transmembrane transport;protein binding;protein homooligomerization;regulation of ion transmembrane transport;voltage-gated potassium channel complex;Voltage gated Potassium channels
gene:ENSMUSG00000042269	chr8:120166396-120177466	Fam92b	6.22329	7.28457	7.11413	6.45232	6.16506	1.20192e-09	A	Positive	E15.5_Ngn3_Het			Singleton	Singleton
gene:ENSMUSG00000053617	chr19:47260173-47464411	Sh3pxd2a	0.211607	2.80886	2.91497	2.64173	1.93317	1.21273e-09	D	Positive	P1			Singleton	Singleton
gene:ENSMUSG00000009394	chr6:115134901-115282626	Syn2	3.55176	5.13064	5.32164	5.20837	5.50897	1.22162e-09	D	Positive	P1	Vesicle-mediated transport and secretion by cell	Adhesion, communication, aggregation and migration;Binding;Biosynthesis and Catalytical activity;Localization and transport;Membrane;Metabolism	GO:0003824;GO:0005515;GO:0005524;GO:0007269;GO:0008152;GO:0030054;GO:0030672	ATP binding;catalytic activity;cell junction;metabolic process;neurotransmitter secretion;protein binding;synaptic vesicle membrane
gene:ENSMUSG00000032855	chr17:24549949-24596514	Pkd1	1.095	2.68039	2.5638	2.25548	1.54254	1.23361e-09	D;O	Positive	P1;P12	Ion transport and homeostasis;Membrane potential and Ion channels	Adhesion, communication, aggregation and migration;Binding;Biological regulation and behavior;Biosynthesis and Catalytical activity;Cell cycle, proliferation, growth and death;Cellular component organization or biogenesis;Developmental process and reproduction;Environmental information processing, response to stimulus and signaling;Genetic Information process;Localization and transport;Membrane;M…	GO:0001568;GO:0001889;GO:0001932;GO:0005262;GO:0005634;GO:0005737;GO:0006875;GO:0006913;GO:0006950;GO:0007155;GO:0007166;GO:0008104;GO:0009628;GO:0010564;GO:0012505;GO:0016021;GO:0018105;GO:0019901;GO:0031328;GO:0031329;GO:0031401;GO:0035556;GO:0042327;GO:0043234;GO:0043549;GO:0044459;GO:0051347;GO:0055074;GO:0060341;GO:0070062;GO:0070588;GO:0072503;GO:1903047	blood vessel development;calcium channel activity;calcium ion homeostasis;calcium ion transmembrane transport;cell adhesion;cell surface receptor signaling pathway;cellular divalent inorganic cation homeostasis;cellular metal ion homeostasis;cytoplasm;endomembrane system;extracellular vesicular exosome;integral component of membrane;intracellular signal transduction;liver development;mitotic cell…
gene:ENSMUSG00000034898	chr9:79815050-79977804	Filip1	3.70124	5.40552	4.8832	4.84565	5.15231	1.24927e-09	D	Positive	P1			Singleton	Singleton
gene:ENSMUSG00000097715	chr13:12619083-12650297	Gpr137b-ps	1.65876	3.7263	3.45884	4.08282	5.20936	1.31493e-09	U	Positive	P60			Singleton	Singleton
gene:ENSMUSG00000033102	chr13:64192544-64274973	Cdc14b	2.51744	3.39386	2.2395	2.27934	1.73221	1.3167e-09	D	Positive	P1	Unclassified	Biosynthesis and Catalytical activity	GO:0008138	protein tyrosine/serine/threonine phosphatase activity
gene:ENSMUSG00000026443	chr1:132880272-132940005	Lrrn2	4.53399	4.45091	5.26408	6.10035	6.4335	1.31699e-09	U	Positive	P60			Singleton	Singleton
gene:ENSMUSG00000027858	chr3:102734528-102772292	Tspan2	3.26397	4.55237	4.77361	4.61988	3.75212	1.34525e-09	A;D;O	Positive	E15.5_Ngn3_Het;P1;P12	Unclassified	Cellular component organization or biogenesis;Developmental process and reproduction;Environmental information processing, response to stimulus and signaling;Membrane	GO:0005886;GO:0006954;GO:0016021;GO:0030030;GO:0030097;GO:0042063;GO:0042552;GO:0048468;GO:0048699;GO:0060322	cell development;cell projection organization;generation of neurons;gliogenesis;head development;hemopoiesis;inflammatory response;integral component of membrane;myelination;plasma membrane
gene:ENSMUSG00000041245	chrX:151198077-151320152	Wnk3	4.68353	4.09507	3.46562	2.09963	1.09999	1.39771e-09	E	Positive	P1	Unclassified	Biological regulation and behavior;Cellular component organization or biogenesis	GO:0009987;GO:0044424;GO:0050794	cellular process;intracellular part;regulation of cellular process
gene:ENSMUSG00000033900	chr3:82358071-82395268	Map9	2.70952	3.09616	2.95238	2.53196	2.22603	1.42155e-09	A;D	Positive	E15.5_Ngn3_Het;P1	Unclassified	Cell cycle, proliferation, growth and death;Cellular component organization or biogenesis;Genetic Information process;Organelle	GO:0000226;GO:0000280;GO:0005634;GO:0005794;GO:0005876;GO:0006461;GO:1903047	Golgi apparatus;microtubule cytoskeleton organization;mitotic cell cycle process;nuclear division;nucleus;protein complex assembly;spindle microtubule
gene:ENSMUSG00000028278	chr4:32983036-33022180	Rragd	2.19191	5.06244	4.79462	4.83136	5.67247	1.42492e-09	D;U	Positive	P1;P60	Unclassified	Binding;Environmental information processing, response to stimulus and signaling;Organelle	GO:0005525;GO:0005764;GO:0046982;path:mmu04150	GTP binding;lysosome;mTOR signaling pathway - Mus musculus (mouse);protein heterodimerization activity
gene:ENSMUSG00000024777	chr19:6227764-6235872	Ppp2r5b	3.11816	3.37793	3.23959	2.913	3.00492	1.43609e-09	A;D	Positive	E15.5_Ngn3_Het;P1	Unclassified	Adhesion, communication, aggregation and migration;Binding;Biological regulation and behavior;Biosynthesis and Catalytical activity;Cell cycle, proliferation, growth and death;Cellular component organization or biogenesis;Developmental process and reproduction;Environmental information processing, response to stimulus and signaling;Genetic Information process;Metabolism	GO:0001932;GO:0005515;GO:0007165;GO:0010565;GO:0010975;GO:0030234;GO:0031334;GO:0043234;GO:0044424;GO:0045666;GO:0045787;GO:0045944;GO:0048523;GO:0048584;GO:0051091;GO:0071156;GO:0071363;path:mmu04728	cellular response to growth factor stimulus;Dopaminergic synapse - Mus musculus (mouse);enzyme regulator activity;intracellular part;negative regulation of cellular process;positive regulation of cell cycle;positive regulation of neuron differentiation;positive regulation of protein complex assembly;positive regulation of response to stimulus;positive regulation of sequence-specific DNA binding t…
gene:ENSMUSG00000030401	chr7:19282661-19296164	Rtn2	4.28734	5.27424	5.24296	4.83974	4.76526	1.43854e-09	A;D	Positive	E15.5_Ngn3_Het;P1	Unclassified	Binding;Biological regulation and behavior;Localization and transport;Membrane	GO:0005515;GO:0005789;GO:0006886;GO:0016021;GO:0030315;GO:0050789;GO:0055085;GO:1902582	endoplasmic reticulum membrane;integral component of membrane;intracellular protein transport;protein binding;regulation of biological process;single-organism intracellular transport;T-tubule;transmembrane transport
gene:ENSMUSG00000035187	chr5:101658138-101665226	Nkx6-1	1.69318	2.24844	2.28178	1.98048	2.55292	1.46548e-09	A;D;U	Positive	E15.5_Ngn3_Het;P1;P60	Insulin processing and signaling	Binding;Biosynthesis and Catalytical activity;Cell cycle, proliferation, growth and death;Cellular component organization or biogenesis;Developmental process and reproduction;Disease;Environmental information processing, response to stimulus and signaling;Genetic Information process;Localization and transport;Organelle	GO:0000981;GO:0001558;GO:0002068;GO:0003682;GO:0005634;GO:0005829;GO:0006351;GO:0007165;GO:0008361;GO:0010468;GO:0010558;GO:0010721;GO:0010975;GO:0021513;GO:0021520;GO:0031018;GO:0032024;GO:0034097;GO:0035094;GO:0042063;GO:0043565;GO:0045666;GO:0045934;GO:0051961;GO:0070062;GO:0071375;GO:1903506;path:mmu04950	cellular response to peptide hormone stimulus;chromatin binding;cytosol;endocrine pancreas development;extracellular vesicular exosome;glandular epithelial cell development;gliogenesis;Maturity onset diabetes of the young - Mus musculus (mouse);negative regulation of cell development;negative regulation of macromolecule biosynthetic process;negative regulation of nervous system development;negati…
gene:ENSMUSG00000057335	chr1:176733652-176807124	Cep170	2.12291	2.96843	2.5759	2.12026	2.01556	1.51737e-09	D	Positive	P1	Unclassified	Cellular component organization or biogenesis;Membrane	GO:0005814;GO:0016020;GO:0031967	centriole;membrane;organelle envelope
gene:ENSMUSG00000049985	chr13:112288450-112384002	Ankrd55	5.04635	7.62968	7.76971	7.11563	7.10496	1.53698e-09	D	Positive	P1	Unclassified	Binding	GO:0005515	protein binding
gene:ENSMUSG00000096146	chr7:46098724-46099897	Kcnj11	2.38847	3.22912	3.00271	2.7377	2.60157	1.55338e-09	A;D	Positive	E15.5_Ngn3_Het;P1	Glycolysis, Glucose processing, Pyruvate metabolism and TCA cycle;Insulin processing and signaling;Ion transport and homeostasis;Membrane potential and Ion channels	Adhesion, communication, aggregation and migration;Binding;Cellular component organization or biogenesis;Disease;Environmental information processing, response to stimulus and signaling;Genetic Information process;Localization and transport;Membrane;Metabolism;Organelle;System process	GO:0002931;GO:0005249;GO:0005524;GO:0005739;GO:0005768;GO:0005783;GO:0005829;GO:0005911;GO:0006006;GO:0008022;GO:0008076;GO:0008092;GO:0030315;GO:0030673;GO:0031420;GO:0031967;GO:0032355;GO:0035094;GO:0042391;GO:0042493;GO:0043025;GO:0044325;GO:0044428;GO:0046676;GO:0050877;GO:0071333;GO:0071407;GO:0071417;GO:0071805;GO:2001259;path:mmu04911;path:mmu04930;REACT_105810;REACT_108208;REACT_112621;RE…	alkali metal ion binding;ATP binding;axolemma;cell-cell junction;cellular response to glucose stimulus;cellular response to organic cyclic compound;cellular response to organonitrogen compound;cytoskeletal protein binding;cytosol;endoplasmic reticulum;endosome;glucose metabolic process;Insulin secretion - Mus musculus (mouse);Integration of energy metabolism;Inwardly rectifying K+ channels;ion ch…
gene:ENSMUSG00000047238	chrX:153036165-153037563	Mageh1	1.74198	2.49784	2.83777	2.52075	2.63957	1.56039e-09	A	Positive	E15.5_Ngn3_Het	Unclassified	Cellular component organization or biogenesis	GO:0005737	cytoplasm
gene:ENSMUSG00000037386	chr15:39198331-39681940	Rims2	3.13583	4.12884	4.11774	3.61138	3.55476	1.59753e-09	A;D	Positive	E15.5_Ngn3_Het;P1	GTPase and G-protein activity;Insulin processing and signaling;Membrane potential and Ion channels;Vesicle-mediated transport and secretion by cell	Adhesion, communication, aggregation and migration;Binding;Cellular component organization or biogenesis;Environmental information processing, response to stimulus and signaling;Localization and transport;Membrane;System process	GO:0006886;GO:0007269;GO:0017137;GO:0017156;GO:0017157;GO:0019904;GO:0019932;GO:0030054;GO:0030073;GO:0042391;GO:0043005;GO:0043234;GO:0044325;GO:0045202;GO:0046872;GO:0046982;path:mmu04911	calcium ion-dependent exocytosis;cell junction;insulin secretion;Insulin secretion - Mus musculus (mouse);intracellular protein transport;ion channel binding;metal ion binding;neuron projection;neurotransmitter secretion;protein complex;protein domain specific binding;protein heterodimerization activity;Rab GTPase binding;regulation of exocytosis;regulation of membrane potential;second-messenger-…
gene:ENSMUSG00000042078	chr5:114026909-114091570	Svop	5.05724	6.33227	6.31454	5.79453	5.2809	1.59934e-09	D	Positive	P1	Ion transport and homeostasis	Adhesion, communication, aggregation and migration;Localization and transport;Membrane	GO:0005215;GO:0016021;GO:0030054;GO:0030672;GO:0034220	cell junction;integral component of membrane;ion transmembrane transport;synaptic vesicle membrane;transporter activity
gene:ENSMUSG00000027894	chr3:107467542-107518018	Slc6a17	3.14032	4.44121	5.24293	3.95091	6.53471	1.59957e-09	U	Positive	P60	Unclassified	Localization and transport;Membrane	GO:0016020;GO:0071702	membrane;organic substance transport
gene:ENSMUSG00000049858	chr10:128669886-128673918	Suox	2.38974	3.49425	3.64103	3.65626	4.10645	1.67122e-09	D;U	Positive	P1;P60	Oxidation-reduction and Oxygen-mediated activity	Binding;Biosynthesis and Catalytical activity;Cellular component organization or biogenesis;Membrane;Metabolism	GO:0005739;GO:0006790;GO:0016491;GO:0031967;GO:0046914;GO:0050662;GO:0055114;GO:0097159;GO:1901363;REACT_112621;REACT_33347	coenzyme binding;heterocyclic compound binding;Metabolism;Metabolism of amino acids and derivatives;mitochondrion;organelle envelope;organic cyclic compound binding;oxidation-reduction process;oxidoreductase activity;sulfur compound metabolic process;transition metal ion binding
gene:ENSMUSG00000031840	chr8:70754678-70758677	Rab3a	1.85895	2.71266	3.24874	3.17865	4.19007	1.68334e-09	D;U	Positive	P1;P60	Vesicle-mediated transport and secretion by cell	Adhesion, communication, aggregation and migration;Binding;Biological regulation and behavior;Biosynthesis and Catalytical activity;Cellular component organization or biogenesis;Developmental process and reproduction;Environmental information processing, response to stimulus and signaling;Genetic Information process;Localization and transport;Membrane;Metabolism;Organelle;System process	GO:0005525;GO:0005634;GO:0005829;GO:0005886;GO:0006886;GO:0007165;GO:0007269;GO:0007274;GO:0007409;GO:0008021;GO:0016188;GO:0019222;GO:0033043;GO:0043195;GO:0048513;GO:0050808;GO:0050954;GO:0051117;GO:0060589;GO:0065009;GO:2000300;REACT_144401;REACT_30788;REACT_88692	Acetylcholine Neurotransmitter Release Cycle;ATPase binding;axonogenesis;cytosol;Glutamate Neurotransmitter Release Cycle;GTP binding;intracellular protein transport;neuromuscular synaptic transmission;neurotransmitter secretion;Norepinephrine Neurotransmitter Release Cycle;nucleoside-triphosphatase regulator activity;nucleus;organ development;plasma membrane;regulation of metabolic process;regul…
gene:ENSMUSG00000056296	chr14:13284779-13615459	Synpr	3.97444	5.5732	5.06329	5.30379	7.71234	1.69738e-09	D;U	Positive	P1;P60	Unclassified	Adhesion, communication, aggregation and migration;Membrane	GO:0030054;GO:0030285	cell junction;integral component of synaptic vesicle membrane
gene:ENSMUSG00000043300	chr3:69574185-69598861	B3galnt1	0.680596	3.68936	3.60695	3.767	4.54814	1.71014e-09	D;U	Positive	P1;P60	Unclassified	Biosynthesis and Catalytical activity;Membrane;Metabolism;Organelle	GO:0005794;GO:0008376;GO:0008378;GO:0016021;GO:0016051;GO:0044763;GO:1901135	acetylgalactosaminyltransferase activity;carbohydrate biosynthetic process;carbohydrate derivative metabolic process;galactosyltransferase activity;Golgi apparatus;integral component of membrane;single-organism cellular process
gene:ENSMUSG00000066705	chr9:45370184-45396158	Fxyd6	2.11466	3.1687	3.21811	2.96606	-0.76068	1.73256e-09	E	Positive	P1			Singleton	Singleton
gene:ENSMUSG00000000686	chr11:77515120-77538607	Abhd15	3.79255	4.71732	4.52262	4.40285	3.41929	1.74081e-09	A;D	Positive	E15.5_Ngn3_Het;P1	Unclassified	Biosynthesis and Catalytical activity;Cellular component organization or biogenesis;Membrane;Metabolism	GO:0005576;GO:0008152;GO:0016020;GO:0016787	extracellular region;hydrolase activity;membrane;metabolic process
gene:ENSMUSG00000020894	chr11:69088489-69092384	Vamp2	1.19599	2.1701	2.22476	2.30172	2.50299	1.77666e-09	D;U	Positive	P1;P60	Calcium-mediated processing;Glycolysis, Glucose processing, Pyruvate metabolism and TCA cycle;Insulin processing and signaling;Vesicle-mediated transport and secretion by cell	Adhesion, communication, aggregation and migration;Binding;Biological regulation and behavior;Cellular component organization or biogenesis;Environmental information processing, response to stimulus and signaling;Localization and transport;Membrane;Organelle;System process	GO:0005516;GO:0005543;GO:0005802;GO:0005886;GO:0006461;GO:0008022;GO:0009749;GO:0016021;GO:0016079;GO:0017022;GO:0017075;GO:0017156;GO:0017157;GO:0030054;GO:0030141;GO:0030659;GO:0030672;GO:0031201;GO:0032388;GO:0032403;GO:0032869;GO:0042802;GO:0043001;GO:0044306;GO:0048471;GO:0060291;GO:0070062;GO:1902589;GO:1903829;path:mmu04721;path:mmu04911;REACT_101773;REACT_102043;REACT_106370;REACT_106459;…	Acetylcholine Neurotransmitter Release Cycle;calcium ion-dependent exocytosis;calmodulin binding;cell junction;cellular response to insulin stimulus;Clathrin derived vesicle budding;cytoplasmic vesicle membrane;extracellular vesicular exosome;GABA synthesis, release, reuptake and degradation;Glutamate Neurotransmitter Release Cycle;Golgi Associated Vesicle Biogenesis;Golgi to plasma membrane prot…
gene:ENSMUSG00000086029	chr2:105536079-105670330	Pax6os1	6.23539	8.49829	8.0017	8.0147	8.10538	1.78703e-09	D	Positive	P1			Singleton	Singleton
gene:ENSMUSG00000071567	chr14:23292290-23293643	A830039N20Rik	5.90849	8.33486	8.30893	8.10911	8.07724	1.81963e-09	D	Positive	P1			Singleton	Singleton
gene:ENSMUSG00000042529	chr11:61022563-61071131	Kcnj12	0.666667	7.23745	8.25119	8.38252	7.09975	1.82173e-09	D;F;O	Positive	P1;P12	Ion transport and homeostasis;Membrane potential and Ion channels	Adhesion, communication, aggregation and migration;Cellular component organization or biogenesis;Localization and transport;Membrane;System process	GO:0015077;GO:0015672;GO:0016021;GO:0022843;GO:0030001;GO:0046873;GO:0051260;GO:0098662;path:mmu04725;REACT_86563	Cholinergic synapse - Mus musculus (mouse);inorganic cation transmembrane transport;integral component of membrane;metal ion transmembrane transporter activity;metal ion transport;monovalent inorganic cation transmembrane transporter activity;monovalent inorganic cation transport;Neuronal System;protein homooligomerization;voltage-gated cation channel activity
gene:ENSMUSG00000028986	chr5:24100589-24161223	Klhl7	2.12441	2.2069	2.13653	1.80534	1.7957	1.86439e-09	A	Positive	E15.5_Ngn3_Het	Unclassified	Binding;Cellular component organization or biogenesis;Genetic Information process;Metabolism;Organelle	GO:0005515;GO:0005737;GO:0043232;GO:0043234;GO:0043412;GO:0044428;GO:0070013;GO:0071944	cell periphery;cytoplasm;intracellular non-membrane-bounded organelle;intracellular organelle lumen;macromolecule modification;nuclear part;protein binding;protein complex
gene:ENSMUSG00000038172	chr4:83220299-83324255	Ttc39b	1.76513	2.44079	2.74071	3.30498	3.33494	1.89714e-09	O	Positive	P12			Singleton	Singleton
gene:ENSMUSG00000029190	chr5:36584787-36696024	D5Ertd579e	0.973005	2.6906	2.17536	2.15908	2.16119	1.93364e-09	D	Positive	P1			Singleton	Singleton
gene:ENSMUSG00000052364	chrX:8892381-8894963	B630019K06Rik	3.0086	4.08884	3.33993	2.99861	3.68736	1.96901e-09	D	Positive	P1			Singleton	Singleton
gene:ENSMUSG00000044646	chr18:75820177-76148561	Zbtb7c	4.12911	5.90301	5.54826	5.61267	2.68522	2.00877e-09	D	Positive	P1	Unclassified	Binding	GO:0005515;GO:0046872;GO:0097159;GO:1901363	heterocyclic compound binding;metal ion binding;organic cyclic compound binding;protein binding
gene:ENSMUSG00000048330	chr7:109034311-109083331	Ric3	3.35988	4.61456	4.23842	4.47455	4.59213	2.03075e-09	D	Positive	P1	Ion transport and homeostasis	Adhesion, communication, aggregation and migration;Binding;Biological regulation and behavior;Cellular component organization or biogenesis;Membrane;Metabolism	GO:0005789;GO:0006461;GO:0007204;GO:0007268;GO:0016021;GO:0033130;GO:0034622;GO:0043170;GO:0044238	acetylcholine receptor binding;cellular macromolecular complex assembly;endoplasmic reticulum membrane;integral component of membrane;macromolecule metabolic process;positive regulation of cytosolic calcium ion concentration;primary metabolic process;protein complex assembly;synaptic transmission
gene:ENSMUSG00000007594	chr8:70083528-70090862	Hapln4	1.97642	5.95883	7.02645	7.89414	10.4773	2.03406e-09	U	Positive	P60	Unclassified	Adhesion, communication, aggregation and migration;Binding	GO:0005515;GO:0022610	biological adhesion;protein binding
gene:ENSMUSG00000043391	chr16:21649044-21694665	2510009E07Rik	2.01266	3.02723	3.20868	3.00931	2.876	2.03644e-09	D	Positive	P1			Singleton	Singleton
gene:ENSMUSG00000038058	chr6:54923941-54972612	Nod1	2.96001	3.41805	3.4008	3.52828	2.70816	2.09888e-09	A;D;O	Positive	E15.5_Ngn3_Het;P1;P12	Unclassified	Binding;Biosynthesis and Catalytical activity;Cell cycle, proliferation, growth and death;Cellular component organization or biogenesis;Environmental information processing, response to stimulus and signaling;Genetic Information process;Membrane;Metabolism	GO:0006915;GO:0019538;GO:0019904;GO:0032270;GO:0032550;GO:0032559;GO:0035556;GO:0035639;GO:0042327;GO:0043065;GO:0044424;GO:0044707;GO:0045177;GO:0051091;GO:0051345;GO:0051704;GO:0070304;GO:0098590	adenyl ribonucleotide binding;apical part of cell;apoptotic process;intracellular part;intracellular signal transduction;multi-organism process;plasma membrane region;positive regulation of apoptotic process;positive regulation of cellular protein metabolic process;positive regulation of hydrolase activity;positive regulation of phosphorylation;positive regulation of sequence-specific DNA binding…
gene:ENSMUSG00000005034	chr3:146729578-146812960	Prkacb	0.591722	2.63341	2.47705	2.1378	2.76626	2.10096e-09	D;K;U	Positive	P1;P4;P60	Calcium-mediated processing;Glycolysis, Glucose processing, Pyruvate metabolism and TCA cycle;GTPase and G-protein activity;Insulin processing and signaling;Protein tyrosine and serine/threonine kinase activity	Adhesion, communication, aggregation and migration;Binding;Biological regulation and behavior;Biosynthesis and Catalytical activity;Cell cycle, proliferation, growth and death;Cellular component organization or biogenesis;Developmental process and reproduction;Disease;Environmental information processing, response to stimulus and signaling;Immune system;Localization and transport;Membrane;Metabol…	GO:0000287;GO:0004713;GO:0005524;GO:0005815;GO:0005829;GO:0005886;GO:0005952;GO:0006468;GO:0009719;GO:0010033;GO:0031625;GO:0035295;GO:0044441;GO:0048471;GO:0048523;GO:0048598;GO:0048646;GO:0048729;GO:0070062;GO:2000026;path:mmu04014;path:mmu04210;path:mmu04310;path:mmu04540;path:mmu04723;path:mmu04727;path:mmu04911;path:mmu04916;path:mmu04961;path:mmu04970;path:mmu04971;path:mmu05032;path:mmu052…	anatomical structure formation involved in morphogenesis;Apoptosis - Mus musculus (mouse);ATP binding;Ca-dependent events;Calmodulin induced events;CaM pathway;cAMP-dependent protein kinase complex;ciliary part;Cytokine Signaling in Immune system;cytosol;DAG and IP3 signaling;DAP12 interactions;DAP12 signaling;Downstream signal transduction;Downstream signaling of activated FGFR;EGFR interacts wi…
gene:ENSMUSG00000031155	chrX:7878261-7883432	Pim2	3.37361	3.17239	2.35475	1.44584	1.49219	2.10443e-09	B	Positive	E15.5_Ngn3_Het			Singleton	Singleton
gene:ENSMUSG00000072214	chr16:18621810-18629938	Sept5	2.26387	3.96175	4.14565	3.97433	3.92765	2.11274e-09	D	Positive	P1	Vesicle-mediated transport and secretion by cell	Adhesion, communication, aggregation and migration;Binding;Cellular component organization or biogenesis;Localization and transport;Membrane;Organelle	GO:0005515;GO:0005525;GO:0005886;GO:0008021;GO:0017157;GO:0043195;GO:0043234;GO:0044430;GO:0044448;GO:0044763	cell cortex part;cytoskeletal part;GTP binding;plasma membrane;protein binding;protein complex;regulation of exocytosis;single-organism cellular process;synaptic vesicle;terminal bouton
gene:ENSMUSG00000032507	chr9:113963636-114046191	Fbxl2	3.24169	4.85695	4.59874	4.27683	4.72443	2.13041e-09	D	Positive	P1	Calcium-mediated processing	Binding;Biosynthesis and Catalytical activity;Membrane;Metabolism	GO:0005516;GO:0006511;GO:0016020;GO:0016567;GO:0016740	calmodulin binding;membrane;protein ubiquitination;transferase activity;ubiquitin-dependent protein catabolic process
gene:ENSMUSG00000017692	chr11:80300911-80355955	Rhbdl3	4.8359	5.76431	5.65812	5.17443	4.14557	2.13162e-09	A;D;O	Positive	E15.5_Ngn3_Het;P1;P12	Calcium-mediated processing	Binding;Biosynthesis and Catalytical activity;Membrane;Metabolism	GO:0005509;GO:0016021;GO:0016787;GO:0019538	calcium ion binding;hydrolase activity;integral component of membrane;protein metabolic process
gene:ENSMUSG00000032338	chr9:58823511-58860955	Hcn4	3.16291	6.04508	5.9006	5.72042	4.97255	2.16882e-09	D	Positive	P1	Ion transport and homeostasis;Membrane potential and Ion channels	Adhesion, communication, aggregation and migration;Binding;Developmental process and reproduction;Environmental information processing, response to stimulus and signaling;Localization and transport;Membrane;System process	GO:0001701;GO:0002027;GO:0005248;GO:0005249;GO:0005887;GO:0015276;GO:0035725;GO:0042391;GO:0042802;GO:0043195;GO:0071320;GO:0071805;REACT_143257;REACT_42352;REACT_86563	cellular response to cAMP;HCN channels;identical protein binding;in utero embryonic development;integral component of plasma membrane;ligand-gated ion channel activity;Neuronal System;Potassium Channels;potassium ion transmembrane transport;regulation of heart rate;regulation of membrane potential;sodium ion transmembrane transport;terminal bouton;voltage-gated potassium channel activity;voltage-…
gene:ENSMUSG00000001173	chrX:47912386-47965868	Ocrl	2.44863	2.32683	2.15133	1.41678	1.30036	2.17955e-09	A	Positive	E15.5_Ngn3_Het	Unclassified	Adhesion, communication, aggregation and migration;Binding;Biological regulation and behavior;Biosynthesis and Catalytical activity;Cellular component organization or biogenesis;Environmental information processing, response to stimulus and signaling;Metabolism;Organelle	GO:0005515;GO:0005737;GO:0007154;GO:0016787;GO:0043227;GO:0044238;GO:0044700;GO:0050794;GO:0071704	cell communication;cytoplasm;hydrolase activity;membrane-bounded organelle;organic substance metabolic process;primary metabolic process;protein binding;regulation of cellular process;single organism signaling
gene:ENSMUSG00000020027	chr10:95385361-95417180	Socs2	0.0253163	4.50422	4.69714	5.02325	6.15442	2.19984e-09	U	Positive	P60	Protein tyrosine and serine/threonine kinase activity	Binding;Biological regulation and behavior;Developmental process and reproduction;Environmental information processing, response to stimulus and signaling;Immune system;Metabolism	GO:0005515;GO:0009968;GO:0016567;GO:0035556;GO:0044464;GO:0050769;GO:0060749;GO:0065008;path:mmu04630;path:mmu04917;REACT_107772;REACT_91328	cell part;Cytokine Signaling in Immune system;Immune System;intracellular signal transduction;Jak-STAT signaling pathway - Mus musculus (mouse);mammary gland alveolus development;negative regulation of signal transduction;positive regulation of neurogenesis;Prolactin signaling pathway - Mus musculus (mouse);protein binding;protein ubiquitination;regulation of biological quality
gene:ENSMUSG00000033863	chr19:23141225-23166911	Klf9	0.58762	4.54477	4.71735	5.53279	5.30204	2.30417e-09	D;F;U	Positive	P1;P60	Unclassified	Binding;Cellular component organization or biogenesis;Developmental process and reproduction;Environmental information processing, response to stimulus and signaling;Genetic Information process;Membrane	GO:0005634;GO:0005737;GO:0005886;GO:0006355;GO:0030522;GO:0044703;GO:0044706;GO:0044707;GO:0070887;GO:0097159;GO:1901363	cellular response to chemical stimulus;cytoplasm;heterocyclic compound binding;intracellular receptor signaling pathway;multi-multicellular organism process;multi-organism reproductive process;nucleus;organic cyclic compound binding;plasma membrane;regulation of transcription, DNA-templated;single-multicellular organism process
gene:ENSMUSG00000042428	chr15:80173720-80215519	Mgat3	2.74811	3.20279	3.45999	2.98108	2.37294	2.33683e-09	A;D	Positive	E15.5_Ngn3_Het;P1	Unclassified	Biosynthesis and Catalytical activity;Membrane;Metabolism	GO:0005975;GO:0006464;GO:0009101;GO:0016020;GO:0016740;GO:0044710	carbohydrate metabolic process;cellular protein modification process;glycoprotein biosynthetic process;membrane;single-organism metabolic process;transferase activity
gene:ENSMUSG00000089996	chrX:136955264-136975497	Tmsb15b2	5.77711	6.21673	5.64936	5.60254	3.48994	2.41823e-09	A	Positive	E15.5_Ngn3_Het	Unclassified	Cellular component organization or biogenesis	GO:0042989	sequestering of actin monomers
gene:ENSMUSG00000020151	chr10:116018212-116274932	Ptprr	3.0597	5.53467	6.12838	5.31153	5.90955	2.42021e-09	D;U	Positive	P1;P60	Unclassified	Binding;Biosynthesis and Catalytical activity;Cellular component organization or biogenesis;Developmental process and reproduction;Genetic Information process;Membrane;Metabolism	GO:0001701;GO:0005615;GO:0005634;GO:0005737;GO:0005886;GO:0006464;GO:0016021;GO:0016311;GO:0016791;GO:0019901	cellular protein modification process;cytoplasm;dephosphorylation;extracellular space;in utero embryonic development;integral component of membrane;nucleus;phosphatase activity;plasma membrane;protein kinase binding
gene:ENSMUSG00000038530	chr1:169741476-169747642	Rgs4	5.63886	4.77611	4.57406	4.60942	8.29381	2.42164e-09	W	Positive	P60			Singleton	Singleton
gene:ENSMUSG00000038486	chr3:96181150-96195521	Sv2a	0.750217	2.72891	2.61524	2.7394	2.80799	2.45543e-09	D;U	Positive	P1;P60	Ion transport and homeostasis	Adhesion, communication, aggregation and migration;Binding;Biological regulation and behavior;Environmental information processing, response to stimulus and signaling;Localization and transport;Membrane;Organelle;System process	GO:0004872;GO:0005515;GO:0005783;GO:0006836;GO:0006874;GO:0008021;GO:0016021;GO:0031594;GO:0043005;GO:0044433;GO:0048786;GO:0055085;GO:0098588	bounding membrane of organelle;cellular calcium ion homeostasis;cytoplasmic vesicle part;endoplasmic reticulum;integral component of membrane;neuromuscular junction;neuron projection;neurotransmitter transport;presynaptic active zone;protein binding;receptor activity;synaptic vesicle;transmembrane transport
gene:ENSMUSG00000021198	chr12:102948858-103184065	Unc79	1.92859	3.24889	3.6864	3.36432	4.09499	2.46124e-09	D	Positive	P1	Membrane potential and Ion channels	Biological regulation and behavior;Cell cycle, proliferation, growth and death;Environmental information processing, response to stimulus and signaling;Localization and transport;Membrane	GO:0016021;GO:0030534;GO:0035264;GO:0045471;REACT_163135;REACT_94109;REACT_94160	adult behavior;integral component of membrane;Ion channel transport;multicellular organism growth;response to ethanol;Stimuli-sensing channels;Transmembrane transport of small molecules
gene:ENSMUSG00000029875	chr15:98167805-98170134	AI836003	6.07693	7.64895	8.35042	7.5436	6.75727	2.55523e-09	A	Positive	E15.5_Ngn3_Het	Unclassified	Cellular component organization or biogenesis	GO:0005737	cytoplasm
gene:ENSMUSG00000038765	chr2:33560964-33640511	Lmx1b	5.52073	5.65743	5.1385	4.35504	1.97768	2.64234e-09	B;L	Positive	E15.5_Ngn3_Het;P4	Unclassified	Biological regulation and behavior;Developmental process and reproduction;Metabolism	GO:0008152;GO:0030182;GO:0050789	metabolic process;neuron differentiation;regulation of biological process
gene:ENSMUSG00000034891	chr13:54758859-54766595	Sncb	3.99988	8.43898	8.50732	8.03582	8.81084	2.67702e-09	D;U	Positive	P1;P60	Calcium-mediated processing	Adhesion, communication, aggregation and migration;Binding;Cell cycle, proliferation, growth and death;Cellular component organization or biogenesis;Genetic Information process;Metabolism;Organelle;System process	GO:0005509;GO:0005634;GO:0005739;GO:0005794;GO:0007268;GO:0015631;GO:0030426;GO:0042417;GO:0043025;GO:0043195;GO:0043524;GO:0050808	calcium ion binding;dopamine metabolic process;Golgi apparatus;growth cone;mitochondrion;negative regulation of neuron apoptotic process;neuronal cell body;nucleus;synapse organization;synaptic transmission;terminal bouton;tubulin binding
gene:ENSMUSG00000028753	chr4:138565359-138635884	Vwa5b1	4.26933	5.93216	5.64026	5.74333	2.27791	2.68252e-09	E	Positive	P1			Singleton	Singleton
gene:ENSMUSG00000028631	chr4:120696137-120748612	Kcnq4	4.86158	5.5743	4.93684	4.45823	4.7195	2.69842e-09	A;D	Positive	E15.5_Ngn3_Het;P1	Ion transport and homeostasis;Membrane potential and Ion channels	Adhesion, communication, aggregation and migration;Developmental process and reproduction;Localization and transport;Membrane;System process	GO:0005251;GO:0007605;GO:0008076;GO:0034765;GO:0042471;GO:0071805;GO:0098590;path:mmu04725;REACT_130040;REACT_42352;REACT_86563	Cholinergic synapse - Mus musculus (mouse);delayed rectifier potassium channel activity;ear morphogenesis;Neuronal System;plasma membrane region;Potassium Channels;potassium ion transmembrane transport;regulation of ion transmembrane transport;sensory perception of sound;voltage-gated potassium channel complex;Voltage gated Potassium channels
gene:ENSMUSG00000024044	chr17:69156809-69289985	Epb4.1l3	1.22709	2.48021	2.22886	2.08608	1.64532	2.71229e-09	D;O	Positive	P1;P12	Unclassified	Adhesion, communication, aggregation and migration;Binding;Cell cycle, proliferation, growth and death;Cellular component organization or biogenesis;Developmental process and reproduction;Localization and transport;Membrane;Organelle;System process	GO:0003779;GO:0005737;GO:0006915;GO:0007009;GO:0007043;GO:0009653;GO:0019898;GO:0022604;GO:0030036;GO:0030054;GO:0030673;GO:0031175;GO:0033270;GO:0042552;GO:0043229;GO:0051235;GO:0072657;path:mmu04530	actin binding;actin cytoskeleton organization;anatomical structure morphogenesis;apoptotic process;axolemma;cell-cell junction assembly;cell junction;cytoplasm;extrinsic component of membrane;intracellular organelle;maintenance of location;myelination;neuron projection development;paranode region of axon;plasma membrane organization;protein localization to membrane;regulation of cell morphogenesi…
gene:ENSMUSG00000041757	chr1:133246096-133303435	Plekha6	1.21675	1.97812	2.25365	2.36212	2.0986	2.88883e-09	D	Positive	P1			Singleton	Singleton
gene:ENSMUSG00000006711	chr13:24845134-24901270	D130043K22Rik	3.92532	5.90963	6.54082	6.48685	7.43401	2.91814e-09	D;U	Positive	P1;P60	Unclassified	Adhesion, communication, aggregation and migration;Cellular component organization or biogenesis;Developmental process and reproduction;Membrane;Organelle	GO:0005769;GO:0005886;GO:0010721;GO:0016021;GO:0016477;GO:0031345;GO:0044440;GO:0050773;GO:0051961;GO:0098588	bounding membrane of organelle;cell migration;early endosome;endosomal part;integral component of membrane;negative regulation of cell development;negative regulation of cell projection organization;negative regulation of nervous system development;plasma membrane;regulation of dendrite development
gene:ENSMUSG00000010021	chr11:114765387-114790739	Kif19a	2.9222	4.07885	4.22844	3.45292	3.8506	2.92212e-09	A;D;U	Positive	E15.5_Ngn3_Het;P1;P60	Unclassified	Adhesion, communication, aggregation and migration;Binding;Biosynthesis and Catalytical activity;Cellular component organization or biogenesis;Metabolism	GO:0000166;GO:0000226;GO:0003777;GO:0005737;GO:0005871;GO:0005874;GO:0005929;GO:0007018;GO:0008017;GO:0008152;GO:0016887;GO:0032550;GO:0035639;GO:0043933	ATPase activity;cilium;cytoplasm;kinesin complex;macromolecular complex subunit organization;metabolic process;microtubule;microtubule-based movement;microtubule binding;microtubule cytoskeleton organization;microtubule motor activity;nucleotide binding;purine ribonucleoside binding;purine ribonucleoside triphosphate binding
gene:ENSMUSG00000020917	chr11:100476352-100528000	Acly	1.36445	2.28432	2.51051	3.04426	2.39108	2.94756e-09	D;U	Positive	P1;P60	Unclassified	Binding;Biosynthesis and Catalytical activity;Metabolism;Organelle	GO:0003824;GO:0005515;GO:0008610;GO:0044262;GO:0046872;GO:0051186;GO:0070062;REACT_112621	catalytic activity;cellular carbohydrate metabolic process;cofactor metabolic process;extracellular vesicular exosome;lipid biosynthetic process;Metabolism;metal ion binding;protein binding
gene:ENSMUSG00000037341	chrX:20105754-20291807	Slc9a7	1.92097	3.60958	4.21796	4.49047	4.55268	3.05966e-09	D;U	Positive	P1;P60	Ion transport and homeostasis;Vesicle-mediated transport and secretion by cell	Biological regulation and behavior;Localization and transport;Membrane;Organelle	GO:0005802;GO:0015079;GO:0015491;GO:0016021;GO:0035725;GO:0055038;GO:0055067;GO:0071805	cation:cation antiporter activity;integral component of membrane;monovalent inorganic cation homeostasis;potassium ion transmembrane transport;potassium ion transmembrane transporter activity;recycling endosome membrane;sodium ion transmembrane transport;trans-Golgi network
gene:ENSMUSG00000037126	chr19:46312086-46327156	Psd	2.19278	4.14405	4.21368	3.84331	3.18094	3.07449e-09	D	Positive	P1	GTPase and G-protein activity;Vesicle-mediated transport and secretion by cell	Adhesion, communication, aggregation and migration;Binding;Biosynthesis and Catalytical activity;Cellular component organization or biogenesis;Developmental process and reproduction;Environmental information processing, response to stimulus and signaling;Localization and transport;Membrane	GO:0005515;GO:0005543;GO:0005886;GO:0016021;GO:0030054;GO:0031252;GO:0042995;GO:0043087;GO:0046578;GO:0048699;path:mmu04144	cell junction;cell leading edge;cell projection;Endocytosis - Mus musculus (mouse);generation of neurons;integral component of membrane;phospholipid binding;plasma membrane;protein binding;regulation of GTPase activity;regulation of Ras protein signal transduction
gene:ENSMUSG00000028803	chr4:135445419-135495038	Nipal3	0.589451	2.33258	2.30117	2.35152	2.33679	3.14785e-09	D;U	Positive	P1;P60	Ion transport and homeostasis	Localization and transport;Membrane	GO:0015095;GO:0015693;GO:0016021	integral component of membrane;magnesium ion transmembrane transporter activity;magnesium ion transport
gene:ENSMUSG00000056158	chr11:93098027-93601749	Car10	3.32766	7.51422	8.39556	7.5453	9.60595	3.22009e-09	U	Positive	P60			Singleton	Singleton
gene:ENSMUSG00000062859	chr17:28066746-28080639	Tcp11	5.58275	6.07067	4.90005	4.24706	2.46199	3.2538e-09	E	Positive	P1			Singleton	Singleton
gene:ENSMUSG00000050822	chr5:142702100-142722490	Slc29a4	3.6603	4.23112	3.75285	2.8679	-0.198024	3.39473e-09	B	Positive	E15.5_Ngn3_Het	Unclassified	Localization and transport;Membrane	GO:0005215;GO:0016021	integral component of membrane;transporter activity
gene:ENSMUSG00000047205	chr11:3895239-3901296	Dusp18	2.48224	3.216	2.81205	2.73373	2.64471	3.44481e-09	A;D	Positive	E15.5_Ngn3_Het;P1	Protein tyrosine and serine/threonine kinase activity	Adhesion, communication, aggregation and migration;Biosynthesis and Catalytical activity;Cellular component organization or biogenesis;Environmental information processing, response to stimulus and signaling;Genetic Information process;Localization and transport;Membrane;Metabolism	GO:0004725;GO:0005634;GO:0005739;GO:0006605;GO:0008138;GO:0010605;GO:0010648;GO:0016482;GO:0019898;GO:0023057;GO:0031224;GO:0031967;GO:0033549;GO:0035335;GO:0042326;GO:0048585;GO:0050896;GO:0051348;GO:0071900;GO:0072594;GO:0072657;GO:1902531	cytoplasmic transport;establishment of protein localization to organelle;extrinsic component of membrane;intrinsic component of membrane;MAP kinase phosphatase activity;mitochondrion;negative regulation of cell communication;negative regulation of macromolecule metabolic process;negative regulation of phosphorylation;negative regulation of response to stimulus;negative regulation of signaling;neg…
gene:ENSMUSG00000013698	chr1:172196727-172206804	Pea15a	1.20834	2.16504	2.19769	2.20733	1.89937	3.50517e-09	D	Positive	P1	Glycolysis, Glucose processing, Pyruvate metabolism and TCA cycle	Binding;Cell cycle, proliferation, growth and death;Cellular component organization or biogenesis;Environmental information processing, response to stimulus and signaling;Localization and transport	GO:0005737;GO:0006915;GO:0009967;GO:0010829;GO:0014070;GO:0015630;GO:0019901;GO:0035556;GO:0043065;GO:0043234;GO:0043279;GO:0044430;GO:0051179;GO:0060359;GO:2001234;GO:2001236	apoptotic process;cytoplasm;cytoskeletal part;intracellular signal transduction;localization;microtubule cytoskeleton;negative regulation of apoptotic signaling pathway;negative regulation of glucose transport;positive regulation of apoptotic process;positive regulation of signal transduction;protein complex;protein kinase binding;regulation of extrinsic apoptotic signaling pathway;response to al…
gene:ENSMUSG00000045903	chr19:4984354-4989971	Npas4	4.12293	7.78334	6.75968	4.40257	10.691	3.53002e-09	Y	Positive	P60			Singleton	Singleton
gene:ENSMUSG00000000216	chr7:121734478-121768475	Scnn1g	2.93314	6.48048	6.77023	5.90911	6.52587	3.6264e-09	D	Positive	P1	Ion transport and homeostasis;Membrane potential and Ion channels	Binding;Biological regulation and behavior;Environmental information processing, response to stimulus and signaling;Localization and transport;Membrane;Organelle;System process	GO:0005887;GO:0009897;GO:0015280;GO:0016324;GO:0019904;GO:0034706;GO:0035725;GO:0050891;GO:0050909;GO:0055065;GO:0055067;GO:0070062;path:mmu04742;path:mmu04960;REACT_163135;REACT_94109;REACT_94160	Aldosterone-regulated sodium reabsorption - Mus musculus (mouse);apical plasma membrane;external side of plasma membrane;extracellular vesicular exosome;integral component of plasma membrane;Ion channel transport;ligand-gated sodium channel activity;metal ion homeostasis;monovalent inorganic cation homeostasis;multicellular organismal water homeostasis;protein domain specific binding;sensory perc…
gene:ENSMUSG00000028613	chr4:107802260-107876840	Lrp8	2.59448	3.74034	2.45828	2.07004	3.04613	3.64824e-09	D	Positive	P1			Singleton	Singleton
gene:ENSMUSG00000004113	chr2:24603886-24763152	Cacna1b	3.52355	5.07138	4.97256	4.72245	4.30875	3.66495e-09	A;D	Positive	E15.5_Ngn3_Het;P1	Calcium-mediated processing;GTPase and G-protein activity;Insulin processing and signaling;Ion transport and homeostasis;Membrane potential and Ion channels;Vesicle-mediated transport and secretion by cell	Adhesion, communication, aggregation and migration;Binding;Biological regulation and behavior;Disease;Environmental information processing, response to stimulus and signaling;Localization and transport;Membrane;System process	GO:0005509;GO:0005524;GO:0005891;GO:0007269;GO:0007626;GO:0008016;GO:0008022;GO:0008217;GO:0008331;GO:0030425;GO:0034765;GO:0043025;GO:0048265;GO:0051924;GO:0070509;GO:0070588;GO:0086010;path:mmu04010;path:mmu04020;path:mmu04721;path:mmu04723;path:mmu04725;path:mmu04726;path:mmu04727;path:mmu04728;path:mmu04742;path:mmu04930;path:mmu05032;path:mmu05033;REACT_106459;REACT_86563;REACT_89275	ATP binding;calcium ion binding;calcium ion import;calcium ion transmembrane transport;Calcium signaling pathway - Mus musculus (mouse);Cholinergic synapse - Mus musculus (mouse);dendrite;Depolarization of the Presynaptic Terminal Triggers the Opening of Calcium Channels;Dopaminergic synapse - Mus musculus (mouse);GABAergic synapse - Mus musculus (mouse);high voltage-gated calcium channel activit…
gene:ENSMUSG00000022026	chr14:80000301-80021930	Olfm4	2.22727	5.85642	6.2235	7.54727	7.39802	3.66652e-09	D;P;U	Positive	P1;P12;P60	Unclassified	Adhesion, communication, aggregation and migration;Binding;Cellular component organization or biogenesis;Developmental process and reproduction;Environmental information processing, response to stimulus and signaling;Immune system;Localization and transport;Membrane;Organelle	GO:0002682;GO:0005615;GO:0005886;GO:0010769;GO:0012505;GO:0042803;GO:0045597;GO:0045785;GO:0048471;GO:0051130;GO:0051260;GO:0070062;GO:1902532	endomembrane system;extracellular space;extracellular vesicular exosome;negative regulation of intracellular signal transduction;perinuclear region of cytoplasm;plasma membrane;positive regulation of cell adhesion;positive regulation of cell differentiation;positive regulation of cellular component organization;protein homodimerization activity;protein homooligomerization;regulation of cell morph…
gene:ENSMUSG00000037032	chr7:105558485-105574402	Apbb1	2.53567	3.28841	3.34429	3.02109	3.68169	3.71292e-09	A;D;U	Positive	E15.5_Ngn3_Het;P1;P60	Unclassified	Adhesion, communication, aggregation and migration;Binding;Biosynthesis and Catalytical activity;Cell cycle, proliferation, growth and death;Cellular component organization or biogenesis;Developmental process and reproduction;Disease;Environmental information processing, response to stimulus and signaling;Genetic Information process;Membrane;Metabolism;Organelle;System process	GO:0001540;GO:0001558;GO:0001764;GO:0003682;GO:0005634;GO:0005737;GO:0005886;GO:0006281;GO:0006351;GO:0007050;GO:0007411;GO:0008542;GO:0010558;GO:0010721;GO:0016570;GO:0018193;GO:0019899;GO:0030426;GO:0031252;GO:0031647;GO:0043062;GO:0043065;GO:0045202;GO:0045944;GO:0048584;GO:0051961;GO:0070013;path:mmu05010	Alzheimer,s disease - Mus musculus (mouse);axon guidance;beta-amyloid binding;cell cycle arrest;cell leading edge;chromatin binding;cytoplasm;DNA repair;enzyme binding;extracellular structure organization;growth cone;histone modification;intracellular organelle lumen;negative regulation of cell development;negative regulation of macromolecule biosynthetic process;negative regulation of nervous sy…
gene:ENSMUSG00000032297	chr9:59577916-59607292	Celf6	5.73723	6.31288	6.62105	6.52418	7.70227	3.79129e-09	A;U	Positive	E15.5_Ngn3_Het;P60	Unclassified	Binding;Cellular component organization or biogenesis;Genetic Information process	GO:0000166;GO:0003723;GO:0005634;GO:0005737;GO:0006397	cytoplasm;mRNA processing;nucleotide binding;nucleus;RNA binding
gene:ENSMUSG00000050821	chr16:20693281-20703048	Fam131a	3.8977	4.48796	4.55167	4.11241	4.99024	3.79472e-09	D	Positive	P1	Unclassified	Cellular component organization or biogenesis	GO:0005576	extracellular region
gene:ENSMUSG00000086822	chr2:131820005-131847660	5330413P13Rik	5.93218	7.32225	7.15829	6.92009	6.42367	3.90759e-09	D	Positive	P1			Singleton	Singleton
gene:ENSMUSG00000029273	chr5:87554644-87569027	Sult1d1	3.86142	5.89769	5.57419	5.82713	2.49455	3.92017e-09	D	Positive	P1	Unclassified	Biosynthesis and Catalytical activity;Metabolism	GO:0003824;GO:0044710	catalytic activity;single-organism metabolic process
gene:ENSMUSG00000024268	chr18:25477631-25753983	Celf4	3.40595	4.4453	4.67547	4.59892	4.92063	3.95476e-09	A;D;U	Positive	E15.5_Ngn3_Het;P1;P60	Membrane potential and Ion channels	Binding;Cellular component organization or biogenesis;Genetic Information process;Membrane	GO:0000166;GO:0005634;GO:0005737;GO:0006397;GO:0010628;GO:0034622;GO:0044822;GO:0045935;GO:0060079	cellular macromolecular complex assembly;cytoplasm;mRNA processing;nucleotide binding;nucleus;poly(A) RNA binding;positive regulation of gene expression;positive regulation of nucleobase-containing compound metabolic process;regulation of excitatory postsynaptic membrane potential
gene:ENSMUSG00000032589	chr9:108096021-108190384	Bsn	1.81385	3.30156	3.46082	3.29946	3.58813	3.95649e-09	D;U	Positive	P1;P60	Unclassified	Adhesion, communication, aggregation and migration;Binding;Cellular component organization or biogenesis;Genetic Information process;Membrane;System process	GO:0005515;GO:0005634;GO:0005737;GO:0015630;GO:0019898;GO:0030054;GO:0030424;GO:0030425;GO:0044306;GO:0046872;GO:0048786	axon;cell junction;cytoplasm;dendrite;extrinsic component of membrane;metal ion binding;microtubule cytoskeleton;neuron projection terminus;nucleus;presynaptic active zone;protein binding
gene:ENSMUSG00000000253	chr13:45507443-45546382	Gmpr	0.685948	3.52635	3.35599	4.14385	3.64874	4.04465e-09	D;O;U	Positive	P1;P12;P60	Oxidation-reduction and Oxygen-mediated activity	Biosynthesis and Catalytical activity;Cellular component organization or biogenesis;Metabolism	GO:0009117;GO:0016491;GO:0043234;GO:0055114;GO:0072521;path:mmu00230;REACT_112621	Metabolism;nucleotide metabolic process;oxidation-reduction process;oxidoreductase activity;protein complex;purine-containing compound metabolic process;Purine metabolism - Mus musculus (mouse)
gene:ENSMUSG00000044748	chr8:21776598-21795185	Defb1	1.66667	6.38335	7.38227	7.50425	7.81041	4.0649e-09	D;K;U	Positive	P1;P4;P60	Unclassified	Cellular component organization or biogenesis;Environmental information processing, response to stimulus and signaling;Immune system;Organelle	GO:0002526;GO:0005615;GO:0033574;GO:0070062;REACT_86987	acute inflammatory response;extracellular space;extracellular vesicular exosome;Innate Immune System;response to testosterone
gene:ENSMUSG00000055485	chr2:157015798-157079254	Soga1	1.52322	2.68438	2.59065	2.18908	0.693961	4.09718e-09	E	Positive	P1	Protein tyrosine and serine/threonine kinase activity	Environmental information processing, response to stimulus and signaling;Metabolism;Organelle	GO:0007169;GO:0009894;GO:0010033;GO:0070062;GO:1901700	extracellular vesicular exosome;regulation of catabolic process;response to organic substance;response to oxygen-containing compound;transmembrane receptor protein tyrosine kinase signaling pathway
gene:ENSMUSG00000023942	chr17:45585199-45599606	Slc29a1	1.06089	2.19593	2.27632	2.10379	2.27655	4.12557e-09	D;U	Positive	P1;P60	Glycolysis, Glucose processing, Pyruvate metabolism and TCA cycle;Membrane potential and Ion channels;Oxidation-reduction and Oxygen-mediated activity	Biological regulation and behavior;Environmental information processing, response to stimulus and signaling;Localization and transport;Membrane	GO:0007595;GO:0009749;GO:0016021;GO:0016323;GO:0016324;GO:0019725;GO:0022891;GO:0042593;GO:0055085;GO:0060079;GO:0071322;GO:0071456;path:mmu05034;REACT_81153;REACT_94160	Alcoholism - Mus musculus (mouse);apical plasma membrane;basolateral plasma membrane;cellular homeostasis;cellular response to carbohydrate stimulus;cellular response to hypoxia;glucose homeostasis;integral component of membrane;lactation;regulation of excitatory postsynaptic membrane potential;response to glucose;SLC-mediated transmembrane transport;substrate-specific transmembrane transporter a…
gene:ENSMUSG00000032839	chr9:95706626-95750358	Trpc1	3.35027	4.73627	4.67813	4.29785	4.19309	4.13242e-09	A;D	Positive	E15.5_Ngn3_Het;P1	Calcium-mediated processing;Ion transport and homeostasis;Membrane potential and Ion channels	Adhesion, communication, aggregation and migration;Binding;Biological regulation and behavior;Environmental information processing, response to stimulus and signaling;Localization and transport;Membrane;System process	GO:0005261;GO:0006874;GO:0015276;GO:0016021;GO:0016323;GO:0022600;GO:0030016;GO:0032386;GO:0032846;GO:0043168;GO:0043178;GO:0043235;GO:0044325;GO:0044449;GO:0045121;GO:0046903;GO:0051592;GO:0051928;GO:0070588;GO:0072509;path:mmu04724;path:mmu04726;path:mmu04972;REACT_163135;REACT_94109;REACT_94160	alcohol binding;anion binding;basolateral plasma membrane;calcium ion transmembrane transport;cation channel activity;cellular calcium ion homeostasis;contractile fiber part;digestive system process;divalent inorganic cation transmembrane transporter activity;Glutamatergic synapse - Mus musculus (mouse);integral component of membrane;ion channel binding;Ion channel transport;ligand-gated ion chan…
gene:ENSMUSG00000047990	chr9:67830531-67832330	C2cd4a	3.84743	7.09625	5.51775	5.26091	6.63493	4.23799e-09	D	Positive	P1			Singleton	Singleton
gene:ENSMUSG00000090066	chr3:138065051-138081506	1110002E22Rik	4.48081	7.99379	6.6663	7.23462	6.45007	4.25466e-09	D	Positive	P1			Singleton	Singleton
gene:ENSMUSG00000038024	chr4:86748554-86850603	Dennd4c	0.792148	2.24647	2.1865	2.25445	2.09793	4.42955e-09	D;U	Positive	P1;P60	GTPase and G-protein activity;Insulin processing and signaling	Biosynthesis and Catalytical activity;Cellular component organization or biogenesis;Environmental information processing, response to stimulus and signaling;Localization and transport;Membrane	GO:0005088;GO:0005829;GO:0005886;GO:0012505;GO:0015031;GO:0030659;GO:0032869;GO:0043234;GO:0043547;GO:0046578;GO:0072659	cellular response to insulin stimulus;cytoplasmic vesicle membrane;cytosol;endomembrane system;plasma membrane;positive regulation of GTPase activity;protein complex;protein localization to plasma membrane;protein transport;Ras guanyl-nucleotide exchange factor activity;regulation of Ras protein signal transduction
gene:ENSMUSG00000039542	chr9:49504360-49798922	Ncam1	3.12857	3.99219	3.97645	3.91873	2.89634	4.46112e-09	A;D;O	Positive	E15.5_Ngn3_Het;P1;P12	Vesicle-mediated transport and secretion by cell	Adhesion, communication, aggregation and migration;Binding;Cellular component organization or biogenesis;Developmental process and reproduction;Environmental information processing, response to stimulus and signaling;Localization and transport;Membrane;System process	GO:0005515;GO:0005886;GO:0005911;GO:0007166;GO:0009967;GO:0017157;GO:0022610;GO:0030030;GO:0030182;GO:0030426;GO:0044297;GO:0048468;GO:0098552;GO:1902531;REACT_86877;REACT_88653	biological adhesion;cell-cell junction;cell body;cell development;cell projection organization;cell surface receptor signaling pathway;growth cone;NCAM signaling for neurite out-growth;NCAM1 interactions;neuron differentiation;plasma membrane;positive regulation of signal transduction;protein binding;regulation of exocytosis;regulation of intracellular signal transduction;side of membrane
gene:ENSMUSG00000032852	chr2:151842926-151874668	Rspo4	5.39392	6.99214	6.73977	7.0022	6.66478	4.46558e-09	D	Positive	P1	Unclassified	Binding;Cellular component organization or biogenesis;Environmental information processing, response to stimulus and signaling	GO:0005539;GO:0005576;GO:0007165;GO:0043168;GO:1901681	anion binding;extracellular region;glycosaminoglycan binding;signal transduction;sulfur compound binding
gene:ENSMUSG00000024109	chr17:90033643-91092805	Nrxn1	3.3724	4.82331	5.86873	5.67324	6.60496	4.53934e-09	D;U	Positive	P1;P60	Calcium-mediated processing;Insulin processing and signaling;Ion transport and homeostasis;Membrane potential and Ion channels;Vesicle-mediated transport and secretion by cell	Adhesion, communication, aggregation and migration;Binding;Biological regulation and behavior;Cellular component organization or biogenesis;Developmental process and reproduction;Environmental information processing, response to stimulus and signaling;Localization and transport;Membrane;Organelle;System process	GO:0001964;GO:0005246;GO:0005509;GO:0007157;GO:0007269;GO:0007612;GO:0009612;GO:0009986;GO:0016021;GO:0016023;GO:0016337;GO:0021549;GO:0021700;GO:0022607;GO:0030054;GO:0030182;GO:0030534;GO:0031345;GO:0032102;GO:0033130;GO:0035176;GO:0042734;GO:0044089;GO:0044295;GO:0045184;GO:0045838;GO:0048306;GO:0048646;GO:0050796;GO:0050806;GO:0050808;GO:0050839;GO:0050885;GO:0051130;GO:0051240;GO:0051963;GO:…	acetylcholine receptor binding;adult behavior;anatomical structure formation involved in morphogenesis;axonal growth cone;calcium-dependent protein binding;calcium channel regulator activity;calcium ion binding;cardiovascular system development;cell adhesion molecule binding;cell junction;cell surface;cellular component assembly;cerebellum development;cytoplasmic membrane-bounded vesicle;developm…
gene:ENSMUSG00000021453	chr13:51846677-51848468	Gadd45g	1.75321	2.31533	3.059	2.18385	3.84522	4.58763e-09	D;U	Positive	P1;P60	Unclassified	Biosynthesis and Catalytical activity;Environmental information processing, response to stimulus and signaling;Metabolism	GO:0000186;GO:0045936;GO:0070304	activation of MAPKK activity;negative regulation of phosphate metabolic process;positive regulation of stress-activated protein kinase signaling cascade
gene:ENSMUSG00000030329	chr6:124996693-125003096	Pianp	2.93817	4.03696	4.64704	3.8172	4.23764	4.62151e-09	D	Positive	P1	Unclassified	Membrane	GO:0016021	integral component of membrane
gene:ENSMUSG00000026950	chr2:52136646-52338798	Neb	0.280434	4.4074	4.59678	5.12463	7.22235	4.64581e-09	U;V	Positive	P60	Unclassified	Binding;Biological regulation and behavior;Cellular component organization or biogenesis;Developmental process and reproduction	GO:0005515;GO:0016043;GO:0030154;GO:0043234;GO:0044085;GO:0044430;GO:0065008	cell differentiation;cellular component biogenesis;cellular component organization;cytoskeletal part;protein binding;protein complex;regulation of biological quality
gene:ENSMUSG00000046709	chr5:102907947-103211334	Mapk10	1.23024	4.24989	5.99711	6.02456	7.21241	4.73379e-09	K;U	Positive	P4;P60	Protein tyrosine and serine/threonine kinase activity	Binding;Biosynthesis and Catalytical activity;Cellular component organization or biogenesis;Disease;Environmental information processing, response to stimulus and signaling;Immune system;Localization and transport;Membrane;Metabolism	GO:0004713;GO:0005515;GO:0005739;GO:0005886;GO:0006468;GO:0007165;GO:0016051;GO:0032550;GO:0032559;GO:0035639;GO:0044255;GO:0044264;GO:1901135;path:mmu04141;path:mmu04722;path:mmu05168;REACT_86987;REACT_88848;REACT_95292	adenyl ribonucleotide binding;carbohydrate biosynthetic process;carbohydrate derivative metabolic process;cellular lipid metabolic process;cellular polysaccharide metabolic process;Herpes simplex infection - Mus musculus (mouse);Innate Immune System;mitochondrion;Neurotrophin signaling pathway - Mus musculus (mouse);plasma membrane;protein binding;protein phosphorylation;Protein processing in end…
gene:ENSMUSG00000062785	chr7:44590663-44604754	Kcnc3	3.01718	3.1568	3.61643	3.41035	2.66188	5.02282e-09	A;D;O	Positive	E15.5_Ngn3_Het;P1;P12	Ion transport and homeostasis;Membrane potential and Ion channels;Vesicle-mediated transport and secretion by cell	Adhesion, communication, aggregation and migration;Binding;Cellular component organization or biogenesis;Localization and transport;Membrane;System process	GO:0005251;GO:0005515;GO:0008076;GO:0030673;GO:0032809;GO:0034765;GO:0043679;GO:0045202;GO:0051260;GO:0071805;GO:1903530;REACT_130040;REACT_42352	axolemma;axon terminus;delayed rectifier potassium channel activity;neuronal cell body membrane;Potassium Channels;potassium ion transmembrane transport;protein binding;protein homooligomerization;regulation of ion transmembrane transport;regulation of secretion by cell;synapse;voltage-gated potassium channel complex;Voltage gated Potassium channels
gene:ENSMUSG00000032120	chr9:44309236-44320282	C2cd2l	1.58113	2.69556	2.99329	2.61542	3.24132	5.18062e-09	D	Positive	P1	Unclassified	Binding;Membrane	GO:0005515;GO:0016021	integral component of membrane;protein binding
gene:ENSMUSG00000052331	chr1:54645339-54926387	Ankrd44	2.13466	2.31185	1.84673	1.95409	0.754138	5.21013e-09	E	Positive	P1			Singleton	Singleton
gene:ENSMUSG00000021728	chr13:117220624-117274098	Emb	1.59561	2.3631	1.59714	1.6444	2.39387	5.33615e-09	U	Positive	P60	Ion transport and homeostasis	Adhesion, communication, aggregation and migration;Localization and transport	GO:0006820;GO:0030054;GO:0055085	anion transport;cell junction;transmembrane transport
gene:ENSMUSG00000074715	chr13:119623818-119654354	Ccl28	3.33403	5.13642	5.92361	5.96695	6.51448	5.52455e-09	D;U	Positive	P1;P60	GTPase and G-protein activity;Ion transport and homeostasis	Adhesion, communication, aggregation and migration;Binding;Biological regulation and behavior;Cellular component organization or biogenesis;Environmental information processing, response to stimulus and signaling;Immune system;Organelle	GO:0001664;GO:0005615;GO:0006955;GO:0007204;GO:0016477;GO:0031667;GO:0070062;GO:0070887;path:mmu04062;REACT_115202;REACT_137560;REACT_32532;REACT_90291	cell migration;cellular response to chemical stimulus;Chemokine signaling pathway - Mus musculus (mouse);Class A/1 (Rhodopsin-like receptors);extracellular space;extracellular vesicular exosome;G-protein coupled receptor binding;G alpha (i) signalling events;immune response;Peptide ligand-binding receptors;positive regulation of cytosolic calcium ion concentration;response to nutrient levels;Sign…
gene:ENSMUSG00000029163	chr5:30913401-30921278	Emilin1	-0.0939263	2.5609	2.77516	3.33757	3.88343	5.53654e-09	U	Positive	P60	Unclassified	Adhesion, communication, aggregation and migration;Binding;Cellular component organization or biogenesis	GO:0005515;GO:0022610;GO:0030198;GO:0043234	biological adhesion;extracellular matrix organization;protein binding;protein complex
gene:ENSMUSG00000046070	chr17:24878769-24882008	Igfals	0.952371	4.00543	4.35121	4.48738	5.77637	5.58884e-09	U	Positive	P60	Unclassified	Adhesion, communication, aggregation and migration;Binding;Cellular component organization or biogenesis;Genetic Information process;Organelle	GO:0005515;GO:0005615;GO:0005634;GO:0022610;GO:0031988	biological adhesion;extracellular space;membrane-bounded vesicle;nucleus;protein binding
gene:ENSMUSG00000024366	chr18:34689902-34720387	Gfra3	3.99598	4.24993	3.36433	2.51459	3.77792	5.71472e-09	D	Positive	P1	Unclassified	Binding;Membrane	GO:0005488;GO:0031224	binding;intrinsic component of membrane
gene:ENSMUSG00000055639	chr14:97786852-98169765	Dach1	1.87973	2.49422	2.2153	2.28931	1.76415	5.71831e-09	A;D	Positive	E15.5_Ngn3_Het;P1	Unclassified	Adhesion, communication, aggregation and migration;Binding;Biosynthesis and Catalytical activity;Cell cycle, proliferation, growth and death;Cellular component organization or biogenesis;Genetic Information process	GO:0000122;GO:0000982;GO:0003677;GO:0005515;GO:0005737;GO:0008283;GO:0010467;GO:0030336;GO:0031981;GO:0034645;GO:0043234;GO:0051704;GO:0065003;GO:0097659	cell proliferation;cellular macromolecule biosynthetic process;cytoplasm;DNA binding;gene expression;macromolecular complex assembly;multi-organism process;negative regulation of cell migration;negative regulation of transcription from RNA polymerase II promoter;nuclear lumen;nucleic acid-templated transcription;protein binding;protein complex;RNA polymerase II core promoter proximal region seque…
gene:ENSMUSG00000040327	chr17:46500571-46546388	Cul9	1.80421	2.78216	3.02449	3.08765	2.84337	5.78531e-09	A;D;K;O	Positive	E15.5_Ngn3_Het;P1;P12;P4	Unclassified	Binding;Biosynthesis and Catalytical activity;Cell cycle, proliferation, growth and death;Cellular component organization or biogenesis;Metabolism	GO:0000226;GO:0006511;GO:0007346;GO:0008270;GO:0031461;GO:0031625;GO:0032446;GO:0051128	cullin-RING ubiquitin ligase complex;microtubule cytoskeleton organization;protein modification by small protein conjugation;regulation of cellular component organization;regulation of mitotic cell cycle;ubiquitin-dependent protein catabolic process;ubiquitin protein ligase binding;zinc ion binding
gene:ENSMUSG00000050640	chr5:100077871-100159808	Tmem150c	2.73892	4.3792	4.46738	4.30154	4.5578	5.93743e-09	D	Positive	P1	Unclassified	Membrane	GO:0016021	integral component of membrane
gene:ENSMUSG00000047193	chr9:6928502-7184446	Dync2h1	1.61325	2.12499	2.2004	2.15271	1.18333	6.11353e-09	D;O	Positive	P1;P12	Unclassified	Adhesion, communication, aggregation and migration;Binding;Biosynthesis and Catalytical activity;Cellular component organization or biogenesis;Developmental process and reproduction;Environmental information processing, response to stimulus and signaling;Localization and transport;Membrane;Metabolism;Organelle	GO:0005874;GO:0005886;GO:0006928;GO:0006996;GO:0007420;GO:0008104;GO:0009967;GO:0012505;GO:0017111;GO:0019538;GO:0030030;GO:0030182;GO:0032550;GO:0032559;GO:0035639;GO:0043231;GO:0044441;GO:0044444;GO:0070062;GO:1902582	adenyl ribonucleotide binding;brain development;cell projection organization;ciliary part;cytoplasmic part;endomembrane system;extracellular vesicular exosome;intracellular membrane-bounded organelle;microtubule;movement of cell or subcellular component;neuron differentiation;nucleoside-triphosphatase activity;organelle organization;plasma membrane;positive regulation of signal transduction;prote…
gene:ENSMUSG00000003411	chr4:108879062-108943324	Rab3b	2.66281	4.34368	4.52096	4.36039	2.00714	6.12055e-09	D;O	Positive	P1;P12	GTPase and G-protein activity	Adhesion, communication, aggregation and migration;Binding;Biological regulation and behavior;Biosynthesis and Catalytical activity;Cellular component organization or biogenesis;Environmental information processing, response to stimulus and signaling;Localization and transport;Metabolism;Organelle	GO:0000166;GO:0005829;GO:0006886;GO:0007264;GO:0017111;GO:0018193;GO:0032535;GO:0043168;GO:0045202;GO:0050806;GO:0060341;GO:0070062	anion binding;cytosol;extracellular vesicular exosome;intracellular protein transport;nucleoside-triphosphatase activity;nucleotide binding;peptidyl-amino acid modification;positive regulation of synaptic transmission;regulation of cellular component size;regulation of cellular localization;small GTPase mediated signal transduction;synapse
gene:ENSMUSG00000004961	chr7:4539767-4546567	Syt5	3.07685	3.88054	4.43166	4.51879	5.2861	6.2373e-09	D;U	Positive	P1;P60	Calcium-mediated processing;Vesicle-mediated transport and secretion by cell	Adhesion, communication, aggregation and migration;Binding;Cellular component organization or biogenesis;Localization and transport;Membrane;Organelle;System process	GO:0005544;GO:0016021;GO:0017156;GO:0030054;GO:0030141;GO:0030672;GO:0043005;GO:0043025;GO:0046872;GO:0046982;GO:0048471;GO:0055038;GO:0071944	calcium-dependent phospholipid binding;calcium ion-dependent exocytosis;cell junction;cell periphery;integral component of membrane;metal ion binding;neuron projection;neuronal cell body;perinuclear region of cytoplasm;protein heterodimerization activity;recycling endosome membrane;secretory granule;synaptic vesicle membrane
gene:ENSMUSG00000032285	chr9:54698872-54716315	Dnaja4	2.66325	3.66183	4.16986	3.7902	4.78639	6.30126e-09	D;U	Positive	P1;P60	Unclassified	Binding;Cellular component organization or biogenesis;Environmental information processing, response to stimulus and signaling;Membrane;Metabolism	GO:0005524;GO:0005829;GO:0006457;GO:0009266;GO:0016020;GO:0046872;GO:0051087;GO:0051129	ATP binding;chaperone binding;cytosol;membrane;metal ion binding;negative regulation of cellular component organization;protein folding;response to temperature stimulus
gene:ENSMUSG00000025318	chr8:121729622-121794276	Jph3	2.84049	5.79334	5.99772	6.42641	4.92966	6.39972e-09	D;O	Positive	P1;P12	Ion transport and homeostasis;Membrane potential and Ion channels	Adhesion, communication, aggregation and migration;Biological regulation and behavior;Cellular component organization or biogenesis;Localization and transport;Membrane;Organelle;System process	GO:0005261;GO:0005886;GO:0007612;GO:0007613;GO:0015276;GO:0016021;GO:0016528;GO:0035640;GO:0040011;GO:0042175;GO:0043234;GO:0044432;GO:0048168;GO:0050885;GO:0070588;GO:0072509;GO:0098588;GO:1901019	bounding membrane of organelle;calcium ion transmembrane transport;cation channel activity;divalent inorganic cation transmembrane transporter activity;endoplasmic reticulum part;exploration behavior;integral component of membrane;learning;ligand-gated ion channel activity;locomotion;memory;neuromuscular process controlling balance;nuclear outer membrane-endoplasmic reticulum membrane network;pla…
gene:ENSMUSG00000044948	chr19:47737560-47919287	Wdr96	5.47251	7.53998	7.09585	5.2299	5.64383	6.4926e-09	D	Positive	P1	Unclassified	Biosynthesis and Catalytical activity;Cell cycle, proliferation, growth and death;Cellular component organization or biogenesis;Environmental information processing, response to stimulus and signaling;Membrane;Metabolism	GO:0005622;GO:0006461;GO:0010605;GO:0016020;GO:0019210;GO:0042326;GO:0042981;GO:0045859;GO:0048585	intracellular;kinase inhibitor activity;membrane;negative regulation of macromolecule metabolic process;negative regulation of phosphorylation;negative regulation of response to stimulus;protein complex assembly;regulation of apoptotic process;regulation of protein kinase activity
gene:ENSMUSG00000032870	chr4:120968316-121017247	Smap2	1.20314	2.02478	1.95735	2.00008	2.47833	6.50679e-09	D;U	Positive	P1;P60	GTPase and G-protein activity	Binding;Biosynthesis and Catalytical activity;Cellular component organization or biogenesis;Environmental information processing, response to stimulus and signaling;Genetic Information process	GO:0005634;GO:0005737;GO:0008270;GO:0043547;GO:0046578;GO:0060589	cytoplasm;nucleoside-triphosphatase regulator activity;nucleus;positive regulation of GTPase activity;regulation of Ras protein signal transduction;zinc ion binding
gene:ENSMUSG00000071719	chrX:99821020-99848790	Tmem28	3.8026	5.28109	5.6675	5.72721	6.15213	6.66804e-09	D	Positive	P1	Unclassified	Membrane	GO:0016021	integral component of membrane
gene:ENSMUSG00000036510	chr8:99024470-99416471	Cdh8	2.10339	4.59308	4.98377	5.31918	7.13476	6.84941e-09	D;U	Positive	P1;P60	Calcium-mediated processing	Adhesion, communication, aggregation and migration;Binding;Cellular component organization or biogenesis;Environmental information processing, response to stimulus and signaling;Membrane;System process	GO:0005509;GO:0005886;GO:0007156;GO:0007270;GO:0009266;GO:0016021;GO:0031012;GO:0033267;GO:0045202	axon part;calcium ion binding;extracellular matrix;homophilic cell adhesion via plasma membrane adhesion molecules;integral component of membrane;neuron-neuron synaptic transmission;plasma membrane;response to temperature stimulus;synapse
gene:ENSMUSG00000009418	chr1:135434579-135585355	Nav1	1.12829	2.36822	2.37774	2.19612	0.646025	6.96066e-09	D	Positive	P1	Unclassified	Binding;Biosynthesis and Catalytical activity	GO:0000166;GO:0017111	nucleoside-triphosphatase activity;nucleotide binding
gene:ENSMUSG00000023019	chr15:99717514-99725005	Gpd1	1.72907	3.98429	3.50422	3.00933	3.51387	6.97008e-09	D	Positive	P1	Glycolysis, Glucose processing, Pyruvate metabolism and TCA cycle;Oxidation-reduction and Oxygen-mediated activity	Binding;Biosynthesis and Catalytical activity;Cellular component organization or biogenesis;Environmental information processing, response to stimulus and signaling;Localization and transport;Metabolism;Organelle	GO:0003824;GO:0005739;GO:0005829;GO:0006006;GO:0006753;GO:0010675;GO:0015980;GO:0031331;GO:0034097;GO:0036094;GO:0042803;GO:0043234;GO:0043467;GO:0046434;GO:0050662;GO:0051186;GO:0060255;GO:0070062;GO:0071320;GO:1902582;REACT_132440	catalytic activity;cellular response to cAMP;coenzyme binding;cofactor metabolic process;cytosol;energy derivation by oxidation of organic compounds;extracellular vesicular exosome;glucose metabolic process;mitochondrion;nucleoside phosphate metabolic process;organophosphate catabolic process;Phospholipid metabolism;positive regulation of cellular catabolic process;protein complex;protein homodim…
gene:ENSMUSG00000052889	chr7:122288750-122634402	Prkcb	1.06936	2.60492	2.54834	2.61067	1.83061	7.06582e-09	D;O	Positive	P1;P12	Calcium-mediated processing;Glycolysis, Glucose processing, Pyruvate metabolism and TCA cycle;GTPase and G-protein activity;Ion transport and homeostasis;Membrane potential and Ion channels;Protein tyrosine and serine/threonine kinase activity;Vesicle-mediated transport and secretion by cell	Adhesion, communication, aggregation and migration;Binding;Biological regulation and behavior;Biosynthesis and Catalytical activity;Cell cycle, proliferation, growth and death;Cellular component organization or biogenesis;Developmental process and reproduction;Disease;Environmental information processing, response to stimulus and signaling;Genetic Information process;Immune system;Localization an…	GO:0002429;GO:0003682;GO:0004697;GO:0004713;GO:0005246;GO:0005524;GO:0005634;GO:0005737;GO:0005886;GO:0006875;GO:0006915;GO:0008270;GO:0009968;GO:0010467;GO:0010468;GO:0010829;GO:0016572;GO:0018193;GO:0019901;GO:0032774;GO:0034645;GO:0035556;GO:0045321;GO:0045765;GO:0050681;GO:0051240;GO:0055074;GO:0065009;GO:0070062;GO:0070838;GO:0071322;GO:0072503;GO:1902533;GO:1903506;GO:2000112;path:mmu04010;…	Amoebiasis - Mus musculus (mouse);androgen receptor binding;apoptotic process;ATP binding;calcium channel regulator activity;calcium ion homeostasis;Calcium signaling pathway - Mus musculus (mouse);Carbohydrate digestion and absorption - Mus musculus (mouse);cellular divalent inorganic cation homeostasis;cellular macromolecule biosynthetic process;cellular metal ion homeostasis;cellular response …
gene:ENSMUSG00000047787	chr19:7092013-7105729	Flrt1	3.93268	4.78227	4.78607	4.27346	2.64582	7.06915e-09	D	Positive	P1	Unclassified	Binding;Cellular component organization or biogenesis;Membrane	GO:0005515;GO:0005615;GO:0016021	extracellular space;integral component of membrane;protein binding
gene:ENSMUSG00000006764	chr10:115078640-115185022	Tph2	2.37643	7.87264	7.84019	8.33303	9.44598	7.12053e-09	D;U	Positive	P1;P60	Oxidation-reduction and Oxygen-mediated activity;Oxoacid metabolic process and Fatty acid activity	Binding;Biological regulation and behavior;Biosynthesis and Catalytical activity;Environmental information processing, response to stimulus and signaling;Metabolism;System process	GO:0006520;GO:0006725;GO:0007623;GO:0010038;GO:0016491;GO:0031667;GO:0036094;GO:0043005;GO:0043168;GO:0046483;GO:0046872;GO:0048545;GO:0055114;GO:0070887;GO:1901360;GO:1901615;path:mmu00380;REACT_112621	anion binding;cellular amino acid metabolic process;cellular aromatic compound metabolic process;cellular response to chemical stimulus;circadian rhythm;heterocycle metabolic process;Metabolism;metal ion binding;neuron projection;organic cyclic compound metabolic process;organic hydroxy compound metabolic process;oxidation-reduction process;oxidoreductase activity;response to metal ion;response t…
gene:ENSMUSG00000086842	chr8:99145385-99148089	Gm15681	5.17472	7.49575	5.87251	7.32461	5.53441	7.41227e-09	D	Positive	P1			Singleton	Singleton
gene:ENSMUSG00000044365	chr3:134236490-134262090	Cxxc4	1.40074	2.23087	2.51945	2.18357	1.45498	7.63128e-09	D;O	Positive	P1;P12	Unclassified	Binding;Cellular component organization or biogenesis;Environmental information processing, response to stimulus and signaling;Genetic Information process;Organelle	GO:0003677;GO:0005515;GO:0005737;GO:0007166;GO:0008270;GO:0030178;GO:0043229;path:mmu04310	cell surface receptor signaling pathway;cytoplasm;DNA binding;intracellular organelle;negative regulation of Wnt signaling pathway;protein binding;Wnt signaling pathway - Mus musculus (mouse);zinc ion binding
gene:ENSMUSG00000061603	chr12:52699382-53151015	Akap6	3.09974	6.47478	6.19327	4.87316	4.74688	8.05691e-09	D;K	Positive	P1;P4	Membrane potential and Ion channels	Binding;Cellular component organization or biogenesis;Environmental information processing, response to stimulus and signaling;Genetic Information process;Localization and transport;Membrane	GO:0016528;GO:0031975;GO:0043234;GO:0044325;GO:0044425;GO:0044428;GO:0048471;GO:0060306;GO:0071320;GO:2001259	cellular response to cAMP;envelope;ion channel binding;membrane part;nuclear part;perinuclear region of cytoplasm;positive regulation of cation channel activity;protein complex;regulation of membrane repolarization;sarcoplasm
gene:ENSMUSG00000025909	chr1:8361474-9299878	Sntg1	4.13675	6.3376	6.68975	7.40819	7.53823	8.14292e-09	D	Positive	P1	Unclassified	Binding;Cellular component organization or biogenesis;Genetic Information process;Membrane	GO:0003779;GO:0005634;GO:0005737;GO:0005856;GO:0008022;GO:0032587	actin binding;cytoplasm;cytoskeleton;nucleus;protein C-terminus binding;ruffle membrane
gene:ENSMUSG00000019852	chr10:18588010-18743758	D10Bwg1379e	0.0600655	2.2666	2.32457	2.42972	2.08173	8.20467e-09	D	Positive	P1	Unclassified	Biosynthesis and Catalytical activity;Membrane;Metabolism;Organelle	GO:0005794;GO:0010921;GO:0016021;GO:0035305	Golgi apparatus;integral component of membrane;negative regulation of dephosphorylation;regulation of phosphatase activity
gene:ENSMUSG00000063160	chr7:27258432-27282144	Numbl	4.10744	3.56495	3.50458	3.34547	1.45264	8.29451e-09	B	Positive	E15.5_Ngn3_Het	Unclassified	Developmental process and reproduction	GO:0030182	neuron differentiation
gene:ENSMUSG00000017756	chr13:73763696-73816743	Slc12a7	1.76452	2.59718	2.25398	1.88507	0.151166	8.42544e-09	B;E	Positive	E15.5_Ngn3_Het;P1	Unclassified	Biological regulation and behavior;Localization and transport	GO:0005215;GO:0042592;GO:0044763	homeostatic process;single-organism cellular process;transporter activity
gene:ENSMUSG00000030671	chr7:114415280-114539251	Pde3b	1.07797	2.13481	2.14746	2.04643	1.61644	8.48044e-09	D;O	Positive	P1;P12	Glycolysis, Glucose processing, Pyruvate metabolism and TCA cycle;GTPase and G-protein activity;Insulin processing and signaling	Adhesion, communication, aggregation and migration;Binding;Biological regulation and behavior;Biosynthesis and Catalytical activity;Cellular component organization or biogenesis;Developmental process and reproduction;Environmental information processing, response to stimulus and signaling;Immune system;Localization and transport;Membrane;Metabolism	GO:0005515;GO:0006163;GO:0007165;GO:0009166;GO:0009259;GO:0009895;GO:0016020;GO:0030155;GO:0031018;GO:0042578;GO:0042593;GO:0043234;GO:0044424;GO:0045765;GO:0046872;GO:0050796;GO:0051093;GO:0051241;path:mmu04914;REACT_109465;REACT_34241;REACT_81688;REACT_89750	endocrine pancreas development;G alpha (s) signalling events;glucose homeostasis;GPCR downstream signaling;Hemostasis;intracellular part;membrane;metal ion binding;negative regulation of catabolic process;negative regulation of developmental process;negative regulation of multicellular organismal process;nucleotide catabolic process;phosphoric ester hydrolase activity;Platelet homeostasis;Progest…
gene:ENSMUSG00000037747	chr10:70557681-70655965	Phyhipl	3.47155	4.02861	4.34825	4.22021	4.12034	8.54023e-09	D	Positive	P1	Unclassified	Binding;Cellular component organization or biogenesis	GO:0005515;GO:0005739	mitochondrion;protein binding
gene:ENSMUSG00000038916	chr10:29143995-29199630	Soga3	3.07328	5.30027	5.90339	5.80741	7.1986	8.55236e-09	D;U	Positive	P1;P60	Unclassified	Cellular component organization or biogenesis;Membrane;Metabolism	GO:0010506;GO:0016021;GO:0044421	extracellular region part;integral component of membrane;regulation of autophagy
gene:ENSMUSG00000037855	chr10:67886102-67912662	Zfp365	2.76499	5.92962	5.40975	5.68289	5.27821	8.58407e-09	D	Positive	P1	Unclassified	Binding;Cellular component organization or biogenesis	GO:0005515;GO:0005737;GO:0005815	cytoplasm;microtubule organizing center;protein binding
gene:ENSMUSG00000024036	chr17:31295482-31350696	Slc37a1	1.5445	2.85003	2.38145	1.88834	1.75031	8.93532e-09	D	Positive	P1	Unclassified	Membrane	GO:0031224	intrinsic component of membrane
gene:ENSMUSG00000028328	chr4:46038934-46116032	Tmod1	2.09598	5.38121	5.19961	4.59529	3.82706	9.16337e-09	D	Positive	P1	Unclassified	Binding;Biological regulation and behavior;Cellular component organization or biogenesis;Genetic Information process;Membrane;System process	GO:0003779;GO:0005523;GO:0006936;GO:0008344;GO:0016020;GO:0030016;GO:0030239;GO:0043234;GO:0044428;GO:0044448	actin binding;adult locomotory behavior;cell cortex part;membrane;muscle contraction;myofibril;myofibril assembly;nuclear part;protein complex;tropomyosin binding
gene:ENSMUSG00000027434	chr2:147177545-147194243	Nkx2-2	2.36654	1.74384	1.76492	1.484	1.75861	9.18497e-09	A	Positive	E15.5_Ngn3_Het	Unclassified	Developmental process and reproduction	GO:0002068;GO:0003310;GO:0007389;GO:0010721;GO:0021515;GO:0021517;GO:0051960	cell differentiation in spinal cord;glandular epithelial cell development;negative regulation of cell development;pancreatic A cell differentiation;pattern specification process;regulation of nervous system development;ventral spinal cord development
gene:ENSMUSG00000041986	chr9:53911459-53975301	Elmod1	7.7836	7.20332	6.58563	6.53358	6.41791	9.41203e-09	A	Positive	E15.5_Ngn3_Het	GTPase and G-protein activity	Biosynthesis and Catalytical activity;Cellular component organization or biogenesis;Genetic Information process;Organelle	GO:0005634;GO:0005737;GO:0030234;GO:0043232;GO:0043547	cytoplasm;enzyme regulator activity;intracellular non-membrane-bounded organelle;nucleus;positive regulation of GTPase activity
gene:ENSMUSG00000037106	chr15:58510047-58665092	Fer1l6	1.96561	6.10044	6.12554	6.60553	7.47706	9.99831e-09	D;U	Positive	P1;P60	Unclassified	Binding;Localization and transport;Membrane	GO:0005515;GO:0016021;GO:0032550;GO:0032559;GO:0035639;GO:0042626;GO:0055085	adenyl ribonucleotide binding;ATPase activity, coupled to transmembrane movement of substances;integral component of membrane;protein binding;purine ribonucleoside binding;purine ribonucleoside triphosphate binding;transmembrane transport
gene:ENSMUSG00000020340	chr11:46193849-46312859	Cyfip2	0.63765	1.96441	2.19496	2.11739	2.42912	1.00059e-08	D;K;U	Positive	P1;P4;P60	Unclassified	Adhesion, communication, aggregation and migration;Binding;Cellular component organization or biogenesis;Immune system;System process	GO:0005515;GO:0022610;GO:0043005;GO:0044763;GO:0045202;GO:0048471;REACT_86987	biological adhesion;Innate Immune System;neuron projection;perinuclear region of cytoplasm;protein binding;single-organism cellular process;synapse
gene:ENSMUSG00000017929	chr2:167298443-167349183	B4galt5	1.46157	2.89043	2.50052	2.29402	1.53869	1.00207e-08	D	Positive	P1	Unclassified	Binding;Biosynthesis and Catalytical activity;Metabolism;Organelle	GO:0016740;GO:0044267;GO:0044431;GO:0044723;GO:0046872;GO:0070062	cellular protein metabolic process;extracellular vesicular exosome;Golgi apparatus part;metal ion binding;single-organism carbohydrate metabolic process;transferase activity
gene:ENSMUSG00000060224	chr19:42725857-42752775	Pyroxd2	2.76982	3.83263	4.0963	4.17547	4.21689	1.0169e-08	D	Positive	P1	Oxidation-reduction and Oxygen-mediated activity	Biosynthesis and Catalytical activity;Metabolism	GO:0016491;GO:0055114	oxidation-reduction process;oxidoreductase activity
gene:ENSMUSG00000039501	chr2:167035792-167063015	Znfx1	1.13456	2.24257	2.11469	2.23382	2.23678	1.03399e-08	D;U	Positive	P1;P60	Unclassified	Binding;Biosynthesis and Catalytical activity;Genetic Information process	GO:0003700;GO:0005634;GO:0008270;GO:0010468;GO:0044822;GO:1903506;GO:2000112	nucleus;poly(A) RNA binding;regulation of cellular macromolecule biosynthetic process;regulation of gene expression;regulation of nucleic acid-templated transcription;sequence-specific DNA binding transcription factor activity;zinc ion binding
gene:ENSMUSG00000010086	chr11:61448441-61454131	Rnf112	6.01729	5.49401	5.65023	4.68376	5.48549	1.05178e-08	A	Positive	E15.5_Ngn3_Het	GTPase and G-protein activity	Binding;Biosynthesis and Catalytical activity;Genetic Information process	GO:0003924;GO:0005634;GO:0008270;GO:0032550;GO:0032561;GO:0035639	GTPase activity;guanyl ribonucleotide binding;nucleus;purine ribonucleoside binding;purine ribonucleoside triphosphate binding;zinc ion binding
gene:ENSMUSG00000001802	chr7:35200026-35215370	Lrp3	1.9416	3.25691	3.46306	3.96624	4.20327	1.06158e-08	D	Positive	P1	Unclassified	Binding	GO:0005515	protein binding
gene:ENSMUSG00000002799	chr12:112908589-112929495	Jag2	0.468612	2.8197	3.6237	2.5637	2.83115	1.07591e-08	D;K	Positive	P1;P4	Unclassified	Developmental process and reproduction;Immune system;Membrane	GO:0001501;GO:0002521;GO:0005887;GO:0042475;GO:0042491;GO:0048598;GO:0048729	auditory receptor cell differentiation;embryonic morphogenesis;integral component of plasma membrane;leukocyte differentiation;odontogenesis of dentin-containing tooth;skeletal system development;tissue morphogenesis
gene:ENSMUSG00000042532	chr19:42247573-42270348	Golga7b	5.38365	6.68407	6.8566	6.624	7.15933	1.09596e-08	D	Positive	P1	Unclassified	Membrane	GO:0000139	Golgi membrane
gene:ENSMUSG00000027692	chr3:28263213-28675858	Tnik	2.28256	3.32203	3.36212	3.57317	3.14375	1.09859e-08	D	Positive	P1	GTPase and G-protein activity;Protein tyrosine and serine/threonine kinase activity	Binding;Biosynthesis and Catalytical activity;Cellular component organization or biogenesis;Developmental process and reproduction;Environmental information processing, response to stimulus and signaling;Genetic Information process;Metabolism;Organelle	GO:0004674;GO:0004713;GO:0004871;GO:0005083;GO:0005515;GO:0005524;GO:0005634;GO:0005856;GO:0007254;GO:0016055;GO:0031532;GO:0043410;GO:0045860;GO:0046328;GO:0046777;GO:0048471;GO:0048814;GO:0055037;GO:0070062;GO:0070304	actin cytoskeleton reorganization;ATP binding;cytoskeleton;extracellular vesicular exosome;JNK cascade;nucleus;perinuclear region of cytoplasm;positive regulation of MAPK cascade;positive regulation of protein kinase activity;positive regulation of stress-activated protein kinase signaling cascade;protein autophosphorylation;protein binding;protein serine/threonine kinase activity;protein tyrosin…
gene:ENSMUSG00000022425	chr15:54838897-54920146	Enpp2	-0.387455	2.54044	2.30512	3.05546	2.12193	1.11226e-08	D;O	Positive	P1;P12	Unclassified	Binding;Membrane;Metabolism	GO:0005887;GO:0008270;GO:0044281	integral component of plasma membrane;small molecule metabolic process;zinc ion binding
gene:ENSMUSG00000066191	chr4:47015668-47057306	Anks6	2.67828	3.24027	3.11832	2.9294	1.49682	1.12499e-08	D;O	Positive	P1;P12	Unclassified	Binding;Cellular component organization or biogenesis	GO:0005515;GO:0005737	cytoplasm;protein binding
gene:ENSMUSG00000050994	chr10:10335702-10472326	Adgb	4.33135	4.71738	4.88937	4.83785	2.33256	1.13793e-08	D;O	Positive	P1;P12	Unclassified	Binding;Cellular component organization or biogenesis;Localization and transport;Metabolism	GO:0005515;GO:0005737;GO:0019538;GO:0044699;GO:0046914;GO:0051179;GO:0097159;GO:1901363	cytoplasm;heterocyclic compound binding;localization;organic cyclic compound binding;protein binding;protein metabolic process;single-organism process;transition metal ion binding
gene:ENSMUSG00000034990	chr7:121083321-121163097	Otoa	5.33782	8.76457	7.87553	5.16142	6.64045	1.14561e-08	D	Positive	P1	Unclassified	Membrane	GO:0016020;GO:0044763	membrane;single-organism cellular process
gene:ENSMUSG00000039236	chr7:78913423-78920362	Isg20	1.58072	3.37942	3.44413	3.4148	4.9753	1.17751e-08	U	Positive	P60	Unclassified	Binding;Biosynthesis and Catalytical activity;Environmental information processing, response to stimulus and signaling;Genetic Information process;Metabolism	GO:0005730;GO:0006952;GO:0016788;GO:0046483;GO:0046872;GO:1901360	defense response;heterocycle metabolic process;hydrolase activity, acting on ester bonds;metal ion binding;nucleolus;organic cyclic compound metabolic process
gene:ENSMUSG00000048965	chr7:143778364-143784500	Mrgpre	2.39906	4.16626	4.19558	4.06516	4.43734	1.19322e-08	D	Positive	P1	GTPase and G-protein activity	Environmental information processing, response to stimulus and signaling;Membrane	GO:0004930;GO:0005886;GO:0007186;GO:0016021	G-protein coupled receptor activity;G-protein coupled receptor signaling pathway;integral component of membrane;plasma membrane
gene:ENSMUSG00000025425	chr18:77185852-77255450	St8sia5	4.23116	7.06935	8.01794	8.27196	7.96569	1.19464e-08	D	Positive	P1	Unclassified	Biosynthesis and Catalytical activity;Membrane	GO:0000139;GO:0006486;GO:0016757;GO:0031301	Golgi membrane;integral component of organelle membrane;protein glycosylation;transferase activity, transferring glycosyl groups
gene:ENSMUSG00000024127	chr17:85063476-85090267	Prepl	0.791944	1.97591	2.0053	1.71051	2.9737	1.1957e-08	U	Positive	P60	Unclassified	Cellular component organization or biogenesis;Metabolism	GO:0005829;GO:0006508	cytosol;proteolysis
gene:ENSMUSG00000000305	chr2:179442430-179899373	Cdh4	1.64795	4.05788	4.55074	3.58244	4.16334	1.20789e-08	D;U	Positive	P1;P60	Calcium-mediated processing	Adhesion, communication, aggregation and migration;Binding;Cell cycle, proliferation, growth and death;Cellular component organization or biogenesis;Developmental process and reproduction;Membrane	GO:0000904;GO:0005509;GO:0005887;GO:0006928;GO:0006935;GO:0007157;GO:0008361;GO:0048639;GO:0048858;GO:0050772;path:mmu04514	calcium ion binding;Cell adhesion molecules (CAMs) - Mus musculus (mouse);cell morphogenesis involved in differentiation;cell projection morphogenesis;chemotaxis;heterophilic cell-cell adhesion via plasma membrane cell adhesion molecules;integral component of plasma membrane;movement of cell or subcellular component;positive regulation of axonogenesis;positive regulation of developmental growth;r…
gene:ENSMUSG00000034723	chr2:134594184-134644145	Tmx4	1.10889	1.57847	2.13165	2.07178	2.69157	1.20856e-08	D;U	Positive	P1;P60	Oxidation-reduction and Oxygen-mediated activity	Biological regulation and behavior;Biosynthesis and Catalytical activity;Environmental information processing, response to stimulus and signaling;Membrane;Metabolism;Organelle	GO:0005783;GO:0006457;GO:0016021;GO:0016860;GO:0019725;GO:0034976	cellular homeostasis;endoplasmic reticulum;integral component of membrane;intramolecular oxidoreductase activity;protein folding;response to endoplasmic reticulum stress
gene:ENSMUSG00000030107	chr6:121245905-121270916	Usp18	4.64828	4.24717	4.70215	4.31345	6.1564	1.21953e-08	U	Positive	P60	Unclassified	Binding;Biosynthesis and Catalytical activity;Environmental information processing, response to stimulus and signaling;Metabolism	GO:0005515;GO:0006464;GO:0014070;GO:0019783;GO:0036459	cellular protein modification process;protein binding;response to organic cyclic compound;ubiquitin-like protein-specific protease activity;ubiquitinyl hydrolase activity
gene:ENSMUSG00000025366	chr10:128510247-128525859	Esyt1	0.608385	2.10853	2.11136	2.04451	2.13396	1.22362e-08	D	Positive	P1	Unclassified	Binding;Membrane	GO:0005515;GO:0030176	integral component of endoplasmic reticulum membrane;protein binding
gene:ENSMUSG00000020889	chr11:98767931-98775333	Nr1d1	-0.283412	3.87001	3.87921	3.43383	4.08284	1.23326e-08	D;U	Positive	P1;P60	Oxidation-reduction and Oxygen-mediated activity	Binding;Biological regulation and behavior;Biosynthesis and Catalytical activity;Developmental process and reproduction;Environmental information processing, response to stimulus and signaling;Genetic Information process;Immune system;Metabolism;Organelle;System process	GO:0000981;GO:0002682;GO:0003707;GO:0005515;GO:0005634;GO:0007623;GO:0008270;GO:0009968;GO:0010467;GO:0010628;GO:0015980;GO:0016051;GO:0019216;GO:0032844;GO:0034645;GO:0042752;GO:0043005;GO:0043401;GO:0043565;GO:0044248;GO:0044264;GO:0045595;GO:0070013;GO:0097659;GO:1901700;GO:1902680;GO:2000113;REACT_85098;REACT_99688	carbohydrate biosynthetic process;cellular catabolic process;cellular macromolecule biosynthetic process;cellular polysaccharide metabolic process;circadian rhythm;energy derivation by oxidation of organic compounds;gene expression;Generic Transcription Pathway;intracellular organelle lumen;negative regulation of cellular macromolecule biosynthetic process;negative regulation of signal transducti…
gene:ENSMUSG00000061322	chr4:41569774-41638158	Dnaic1	5.67149	6.69664	7.21417	6.91273	7.35511	1.2446e-08	A;D	Positive	E15.5_Ngn3_Het;P1	Unclassified	Adhesion, communication, aggregation and migration;Binding;Biosynthesis and Catalytical activity;Cellular component organization or biogenesis;Metabolism	GO:0003774;GO:0005515;GO:0005737;GO:0005874;GO:0005929;GO:0007018;GO:0008152	cilium;cytoplasm;metabolic process;microtubule;microtubule-based movement;motor activity;protein binding
gene:ENSMUSG00000053889	chr9:34918232-34929509	A130066N16Rik	2.9439	5.52408	5.5912	5.84741	7.08934	1.26089e-08	U	Positive	P60			Singleton	Singleton
gene:ENSMUSG00000021733	chr14:14703024-14799943	Slc4a7	0.765328	2.32934	2.12197	1.90612	1.5372	1.26109e-08	D;K	Positive	P1;P4	Ion transport and homeostasis;Membrane potential and Ion channels	Developmental process and reproduction;Localization and transport;Membrane	GO:0006820;GO:0015291;GO:0016021;GO:0042491;GO:0044459;GO:0090596	anion transport;auditory receptor cell differentiation;integral component of membrane;plasma membrane part;secondary active transmembrane transporter activity;sensory organ morphogenesis
gene:ENSMUSG00000029712	chr5:137553516-137569582	Actl6b	6.36999	7.08992	6.8325	6.84543	7.58142	1.28865e-08	A;D;U	Positive	E15.5_Ngn3_Het;P1;P60	Unclassified	Binding;Biosynthesis and Catalytical activity;Cellular component organization or biogenesis;Developmental process and reproduction;Genetic Information process	GO:0005515;GO:0005730;GO:0006333;GO:0007399;GO:0010467;GO:0010468;GO:0034645;GO:0043234;GO:0097659;GO:1903506;GO:2000112	cellular macromolecule biosynthetic process;chromatin assembly or disassembly;gene expression;nervous system development;nucleic acid-templated transcription;nucleolus;protein binding;protein complex;regulation of cellular macromolecule biosynthetic process;regulation of gene expression;regulation of nucleic acid-templated transcription
gene:ENSMUSG00000029644	chr5:147269958-147278008	Pdx1	1.05063	2.08188	2.26229	1.83022	1.67706	1.29208e-08	D;K;O	Positive	P1;P12;P4	Glycolysis, Glucose processing, Pyruvate metabolism and TCA cycle;Insulin processing and signaling;Vesicle-mediated transport and secretion by cell	Binding;Biological regulation and behavior;Biosynthesis and Catalytical activity;Cell cycle, proliferation, growth and death;Cellular component organization or biogenesis;Developmental process and reproduction;Disease;Environmental information processing, response to stimulus and signaling;Genetic Information process;Localization and transport;Metabolism	GO:0000978;GO:0001889;GO:0002793;GO:0003682;GO:0005654;GO:0005829;GO:0006006;GO:0007584;GO:0008285;GO:0009593;GO:0009749;GO:0010035;GO:0010628;GO:0010629;GO:0019932;GO:0030073;GO:0031018;GO:0031099;GO:0031328;GO:0032403;GO:0033993;GO:0034645;GO:0035094;GO:0042593;GO:0046887;GO:0048598;GO:0048729;GO:0050714;GO:0090276;GO:0097659;GO:1902236;GO:1902679;GO:1903506;GO:2000113;path:mmu04911;path:mmu049…	cellular macromolecule biosynthetic process;chromatin binding;cytosol;detection of chemical stimulus;embryonic morphogenesis;endocrine pancreas development;glucose homeostasis;glucose metabolic process;insulin secretion;Insulin secretion - Mus musculus (mouse);liver development;Maturity onset diabetes of the young - Mus musculus (mouse);negative regulation of cell proliferation;negative regulatio…
gene:ENSMUSG00000021775	chr14:18204053-18239127	Nr1d2	0.123968	2.58221	2.44513	2.26635	2.37499	1.30705e-08	D	Positive	P1	Unclassified	Binding;Biological regulation and behavior;Biosynthesis and Catalytical activity;Developmental process and reproduction;Environmental information processing, response to stimulus and signaling;Genetic Information process;Metabolism	GO:0000981;GO:0003707;GO:0005515;GO:0005634;GO:0008270;GO:0010467;GO:0010628;GO:0019216;GO:0030522;GO:0032844;GO:0034645;GO:0042752;GO:0043401;GO:0043565;GO:0045595;GO:0055088;GO:0097659;GO:1902680;GO:2000026;GO:2000113;REACT_85098;REACT_99688	cellular macromolecule biosynthetic process;gene expression;Generic Transcription Pathway;intracellular receptor signaling pathway;lipid homeostasis;negative regulation of cellular macromolecule biosynthetic process;Nuclear Receptor transcription pathway;nucleic acid-templated transcription;nucleus;positive regulation of gene expression;positive regulation of RNA biosynthetic process;protein bind…
gene:ENSMUSG00000039395	chr1:72159232-72212307	Mreg	3.299	3.8106	4.43559	4.60908	3.2088	1.30996e-08	D;O	Positive	P1;P12	Unclassified	Binding;Cellular component organization or biogenesis;Developmental process and reproduction;Localization and transport	GO:0005515;GO:0021700;GO:0044707;GO:0045177;GO:0051648;GO:0051656;GO:0071944	apical part of cell;cell periphery;developmental maturation;establishment of organelle localization;protein binding;single-multicellular organism process;vesicle localization
gene:ENSMUSG00000074207	chr3:138260990-138290698	Adh1	0.659509	3.49	3.87216	4.6062	4.65203	1.32134e-08	D;O;U	Positive	P1;P12;P60	Oxidation-reduction and Oxygen-mediated activity;Oxoacid metabolic process and Fatty acid activity	Binding;Biosynthesis and Catalytical activity;Cellular component organization or biogenesis;Environmental information processing, response to stimulus and signaling;Metabolism	GO:0005739;GO:0008270;GO:0016614;GO:0016747;GO:0032787;GO:0033574;GO:0042445;GO:0042803;GO:0044255;GO:0044707;GO:0055114;GO:1901615;path:mmu00982;REACT_112621;REACT_128784	Abacavir metabolism;cellular lipid metabolic process;Drug metabolism - cytochrome P450 - Mus musculus (mouse);hormone metabolic process;Metabolism;mitochondrion;monocarboxylic acid metabolic process;organic hydroxy compound metabolic process;oxidation-reduction process;oxidoreductase activity, acting on CH-OH group of donors;protein homodimerization activity;response to testosterone;single-multic…
gene:ENSMUSG00000039431	chr8:40551094-40634797	Mtmr7	1.46575	2.23791	2.04557	2.06164	1.95914	1.32472e-08	D	Positive	P1	Unclassified	Binding;Biosynthesis and Catalytical activity;Cellular component organization or biogenesis;Membrane;Metabolism	GO:0004725;GO:0005515;GO:0005829;GO:0016020;GO:0019751;GO:0035335;GO:0044262;GO:0044282;GO:0046434;GO:0046488;REACT_112621;REACT_132440;REACT_144613;REACT_93157	cellular carbohydrate metabolic process;cytosol;membrane;Metabolism;Metabolism of lipids and lipoproteins;organophosphate catabolic process;peptidyl-tyrosine dephosphorylation;phosphatidylinositol metabolic process;Phospholipid metabolism;PI Metabolism;polyol metabolic process;protein binding;protein tyrosine phosphatase activity;small molecule catabolic process
gene:ENSMUSG00000039318	chr1:185204167-185286743	Rab3gap2	0.520024	2.26419	2.13106	2.04854	1.76262	1.33164e-08	D	Positive	P1	Unclassified	Cellular component organization or biogenesis;Membrane	GO:0005737;GO:0016020	cytoplasm;membrane
gene:ENSMUSG00000059713	chr4:135412307-135433853	Rcan3	0.91277	2.0495	2.07983	2.03701	1.61706	1.3341e-08	D	Positive	P1	Calcium-mediated processing	Binding;Environmental information processing, response to stimulus and signaling	GO:0000166;GO:0005515;GO:0019722	calcium-mediated signaling;nucleotide binding;protein binding
gene:ENSMUSG00000063568	chr6:52768796-53068631	Jazf1	3.00842	3.83706	3.95704	3.53858	3.05165	1.33617e-08	A;D	Positive	E15.5_Ngn3_Het;P1	Unclassified	Binding;Biosynthesis and Catalytical activity;Cellular component organization or biogenesis;Genetic Information process	GO:0000122;GO:0003714;GO:0005634;GO:0010467;GO:0034645;GO:0043234;GO:0097159;GO:0097659;GO:1901363	cellular macromolecule biosynthetic process;gene expression;heterocyclic compound binding;negative regulation of transcription from RNA polymerase II promoter;nucleic acid-templated transcription;nucleus;organic cyclic compound binding;protein complex;transcription corepressor activity
gene:ENSMUSG00000040537	chr5:8072351-8368160	Adam22	1.30178	2.6894	3.11963	3.57565	3.01109	1.34193e-08	D;O;U	Positive	P1;P12;P60	Unclassified	Binding;Biological regulation and behavior;Biosynthesis and Catalytical activity;Membrane;Metabolism	GO:0003824;GO:0005515;GO:0006508;GO:0008270;GO:0008344;GO:0016021;GO:0044763	adult locomotory behavior;catalytic activity;integral component of membrane;protein binding;proteolysis;single-organism cellular process;zinc ion binding
gene:ENSMUSG00000055125	chr9:67758712-67760208	M5C1000I18Rik	2.47127	5.87465	5.62765	5.35978	4.92532	1.35327e-08	D	Positive	P1			Singleton	Singleton
gene:ENSMUSG00000058672	chr13:34074300-34078008	Tubb2a	1.73743	2.03637	2.43974	1.79924	2.61255	1.36409e-08	D;U	Positive	P1;P60	GTPase and G-protein activity	Binding;Biosynthesis and Catalytical activity;Cellular component organization or biogenesis	GO:0003924;GO:0015630;GO:0032561;GO:0034622	cellular macromolecular complex assembly;GTPase activity;guanyl ribonucleotide binding;microtubule cytoskeleton
gene:ENSMUSG00000029173	chr5:52640086-52669729	Sepsecs	0.792288	2.2098	2.1455	2.23983	1.00456	1.37758e-08	D;O	Positive	P1;P12	Unclassified	Binding;Biosynthesis and Catalytical activity;Cellular component organization or biogenesis;Genetic Information process;Metabolism	GO:0005515;GO:0005634;GO:0005737;GO:0010467;GO:0010468;GO:0016740;GO:0032774;GO:0044267;GO:2000112	cellular protein metabolic process;cytoplasm;gene expression;nucleus;protein binding;regulation of cellular macromolecule biosynthetic process;regulation of gene expression;RNA biosynthetic process;transferase activity
gene:ENSMUSG00000024098	chr17:65923065-65951187	Twsg1	1.27515	2.16	1.94932	1.64858	1.95235	1.39027e-08	D;U	Positive	P1;P60	Unclassified	Binding;Biological regulation and behavior;Developmental process and reproduction;Environmental information processing, response to stimulus and signaling;Genetic Information process;Organelle;System process	GO:0001503;GO:0005515;GO:0006357;GO:0007166;GO:0007420;GO:0009887;GO:0009888;GO:0009967;GO:0030097;GO:0045596;GO:0048646;GO:0051241;GO:0070062	anatomical structure formation involved in morphogenesis;brain development;cell surface receptor signaling pathway;extracellular vesicular exosome;hemopoiesis;negative regulation of cell differentiation;negative regulation of multicellular organismal process;organ morphogenesis;ossification;positive regulation of signal transduction;protein binding;regulation of transcription from RNA polymerase …
gene:ENSMUSG00000026764	chr2:49619297-49774778	Kif5c	2.68075	3.87033	4.03708	3.73704	5.1559	1.40527e-08	D;U	Positive	P1;P60	Unclassified	Adhesion, communication, aggregation and migration;Binding;Biosynthesis and Catalytical activity;Cellular component organization or biogenesis;Environmental information processing, response to stimulus and signaling;Genetic Information process;Localization and transport	GO:0003700;GO:0003774;GO:0005524;GO:0005737;GO:0005871;GO:0005874;GO:0007018;GO:0007165;GO:0010468;GO:0015631;GO:0032403;GO:0060089;GO:0071702;GO:1903506;GO:2000112	ATP binding;cytoplasm;kinesin complex;microtubule;microtubule-based movement;molecular transducer activity;motor activity;organic substance transport;protein complex binding;regulation of cellular macromolecule biosynthetic process;regulation of gene expression;regulation of nucleic acid-templated transcription;sequence-specific DNA binding transcription factor activity;signal transduction;tubuli…
gene:ENSMUSG00000062275	chr9:109601116-109626059	Fbxw24	5.51631	7.43385	6.46638	7.76099	9.09257	1.44248e-08	U	Positive	P60			Singleton	Singleton
gene:ENSMUSG00000024030	chr17:31057697-31115777	Abcg1	1.43663	2.48453	2.27216	2.18453	2.21031	1.44776e-08	A;D	Positive	E15.5_Ngn3_Het;P1	Ion transport and homeostasis	Binding;Biological regulation and behavior;Biosynthesis and Catalytical activity;Cellular component organization or biogenesis;Developmental process and reproduction;Environmental information processing, response to stimulus and signaling;Genetic Information process;Localization and transport;Membrane;Metabolism;Organelle	GO:0005524;GO:0005548;GO:0005739;GO:0005794;GO:0008565;GO:0009719;GO:0009897;GO:0010876;GO:0015405;GO:0015711;GO:0016021;GO:0016820;GO:0016887;GO:0019218;GO:0022891;GO:0032370;GO:0033993;GO:0042803;GO:0043170;GO:0043933;GO:0044238;GO:0044710;GO:0044763;GO:0045596;GO:0046889;GO:0046982;GO:0055037;GO:0065008;GO:1902582;GO:1903506;GO:2000112;path:mmu02010;REACT_110770;REACT_112621;REACT_115490;REACT…	ABC-family proteins mediated transport;ABC transporters - Mus musculus (mouse);ABCA transporters in lipid homeostasis;ATP binding;ATPase activity;external side of plasma membrane;Golgi apparatus;hydrolase activity, acting on acid anhydrides, catalyzing transmembrane movement of substances;integral component of membrane;lipid localization;macromolecular complex subunit organization;macromolecule m…
gene:ENSMUSG00000035246	chrX:93654862-93749951	Pcyt1b	3.95663	2.62706	2.01879	2.40478	1.02956	1.45633e-08	B	Positive	E15.5_Ngn3_Het			Singleton	Singleton
gene:ENSMUSG00000007908	chr9:76014854-76136350	Hmgcll1	3.049	4.64992	4.59867	4.50133	4.75583	1.47715e-08	D	Positive	P1	Unclassified	Binding;Biosynthesis and Catalytical activity;Cellular component organization or biogenesis;Membrane	GO:0005789;GO:0005829;GO:0016830;GO:0044283;GO:0044763;GO:0046872;GO:0048471;GO:1901576	carbon-carbon lyase activity;cytosol;endoplasmic reticulum membrane;metal ion binding;organic substance biosynthetic process;perinuclear region of cytoplasm;single-organism cellular process;small molecule biosynthetic process
gene:ENSMUSG00000014905	chr12:44205896-44210068	Dnajb9	0.431894	1.5618	2.18309	1.90598	3.72867	1.47946e-08	U;V	Positive	P60	Unclassified	Cellular component organization or biogenesis;Organelle	GO:0043229;GO:0044444	cytoplasmic part;intracellular organelle
gene:ENSMUSG00000019302	chr11:101009451-101063719	Atp6v0a1	1.22275	1.94193	1.79259	1.84389	2.0671	1.50404e-08	A;D;U	Positive	E15.5_Ngn3_Het;P1;P60	Insulin processing and signaling;Ion transport and homeostasis;Oxidation-reduction and Oxygen-mediated activity;Vesicle-mediated transport and secretion by cell	Binding;Developmental process and reproduction;Disease;Environmental information processing, response to stimulus and signaling;Genetic Information process;Immune system;Localization and transport;Membrane;Metabolism;Organelle	GO:0005634;GO:0005773;GO:0005794;GO:0005886;GO:0015077;GO:0015991;GO:0016021;GO:0030659;GO:0033179;GO:0051117;GO:0070062;GO:0098588;path:mmu00190;path:mmu04142;path:mmu04145;path:mmu04721;path:mmu04966;path:mmu05323;REACT_101230;REACT_115202;REACT_118324;REACT_126778;REACT_146500;REACT_146901;REACT_80574;REACT_81379;REACT_94160	ATP hydrolysis coupled proton transport;ATPase binding;bounding membrane of organelle;Collecting duct acid secretion - Mus musculus (mouse);cytoplasmic vesicle membrane;Disease;extracellular vesicular exosome;Golgi apparatus;Insulin receptor recycling;integral component of membrane;Iron uptake and transport;Latent infection of Homo sapiens with Mycobacterium tuberculosis;Lysosome - Mus musculus (…
gene:ENSMUSG00000028909	chr4:131768456-131838288	Ptpru	3.16823	3.34318	3.37093	3.40995	1.40625	1.53457e-08	O	Positive	P12	Unclassified	Adhesion, communication, aggregation and migration;Binding;Developmental process and reproduction;Localization and transport;Membrane;Metabolism	GO:0005515;GO:0006793;GO:0016020;GO:0019538;GO:0030336;GO:0044763;GO:0048513;GO:0051179	localization;membrane;negative regulation of cell migration;organ development;phosphorus metabolic process;protein binding;protein metabolic process;single-organism cellular process
gene:ENSMUSG00000068742	chr2:92403645-92434043	Cry2	1.07304	2.17044	2.16033	2.08628	1.90076	1.56304e-08	D;K;O;U	Positive	P1;P12;P4;P60	Glycolysis, Glucose processing, Pyruvate metabolism and TCA cycle;Ion transport and homeostasis;Vesicle-mediated transport and secretion by cell	Binding;Biological regulation and behavior;Biosynthesis and Catalytical activity;Cellular component organization or biogenesis;Environmental information processing, response to stimulus and signaling;Genetic Information process;Localization and transport;Metabolism	GO:0004871;GO:0005102;GO:0005576;GO:0005654;GO:0005739;GO:0005829;GO:0006281;GO:0006355;GO:0006464;GO:0006605;GO:0006913;GO:0007165;GO:0009416;GO:0009968;GO:0010467;GO:0010629;GO:0010876;GO:0010921;GO:0016830;GO:0019901;GO:0019902;GO:0032182;GO:0032922;GO:0034504;GO:0034645;GO:0035305;GO:0042593;GO:0043434;GO:0043565;GO:0044070;GO:0046888;GO:0050660;GO:0051235;GO:0051241;GO:0051346;GO:0072594;GO:…	carbon-carbon lyase activity;cellular macromolecule biosynthetic process;cellular protein modification process;Circadian Clock;circadian regulation of gene expression;Circadian rhythm - Mus musculus (mouse);cytosol;DNA repair;establishment of protein localization to organelle;extracellular region;flavin adenine dinucleotide binding;gene expression;glucose homeostasis;lipid localization;maintenanc…
gene:ENSMUSG00000024308	chr17:33915898-33929288	Tapbp	0.954367	1.95491	2.00846	2.15112	1.96747	1.56726e-08	D;U	Positive	P1;P60	Unclassified	Binding;Cellular component organization or biogenesis;Environmental information processing, response to stimulus and signaling;Immune system;Membrane;Metabolism;Organelle	GO:0005515;GO:0005887;GO:0006952;GO:0019882;GO:0030139;GO:0030176;GO:0030659;GO:0034622;GO:0034641;GO:0043234;GO:0070271;GO:0071822;GO:1901564;path:mmu04612;REACT_111008;REACT_86224	Antigen Presentation: Folding, assembly and peptide loading of class I MHC;antigen processing and presentation;Antigen processing and presentation - Mus musculus (mouse);cellular macromolecular complex assembly;cellular nitrogen compound metabolic process;Class I MHC mediated antigen processing & presentation;cytoplasmic vesicle membrane;defense response;endocytic vesicle;integral component of en…
gene:ENSMUSG00000026834	chr2:58267452-58357895	Acvr1c	2.16768	3.17782	2.3243	2.45476	1.20111	1.59777e-08	D;E;O	Positive	P1;P12	Unclassified	Adhesion, communication, aggregation and migration;Binding;Biosynthesis and Catalytical activity;Developmental process and reproduction;Environmental information processing, response to stimulus and signaling;Membrane	GO:0030154;GO:0030336;GO:0032550;GO:0035639;GO:0043235;GO:0044425;GO:0050896;GO:0051093;GO:1902494	catalytic complex;cell differentiation;membrane part;negative regulation of cell migration;negative regulation of developmental process;purine ribonucleoside binding;purine ribonucleoside triphosphate binding;receptor complex;response to stimulus
gene:ENSMUSG00000021314	chr13:18948370-19150913	Amph	3.37783	4.80744	5.21497	5.54413	7.29616	1.61108e-08	D;U	Positive	P1;P60	Vesicle-mediated transport and secretion by cell	Adhesion, communication, aggregation and migration;Binding;Cellular component organization or biogenesis;Localization and transport;Membrane;Organelle;System process	GO:0005515;GO:0005856;GO:0007267;GO:0007612;GO:0008021;GO:0016192;GO:0030054;GO:0043167;GO:0044425;GO:0044433;GO:0071944;GO:0097479;GO:0098588	bounding membrane of organelle;cell-cell signaling;cell junction;cell periphery;cytoplasmic vesicle part;cytoskeleton;ion binding;learning;membrane part;protein binding;synaptic vesicle;synaptic vesicle localization;vesicle-mediated transport
gene:ENSMUSG00000025876	chr13:54949410-55006018	Unc5a	3.14156	3.29811	3.32899	3.79351	2.93964	1.70558e-08	A;O	Positive	E15.5_Ngn3_Het;P12	Unclassified	Cell cycle, proliferation, growth and death;Cellular component organization or biogenesis;Developmental process and reproduction;Environmental information processing, response to stimulus and signaling;Membrane	GO:0000904;GO:0005829;GO:0006915;GO:0007165;GO:0016020;GO:0030182;GO:0048858	apoptotic process;cell morphogenesis involved in differentiation;cell projection morphogenesis;cytosol;membrane;neuron differentiation;signal transduction
gene:ENSMUSG00000004347	chr6:56069820-56369634	Pde1c	3.7081	2.91742	2.23097	1.70444	1.84909	1.71297e-08	B	Positive	E15.5_Ngn3_Het			Singleton	Singleton
gene:ENSMUSG00000015968	chr14:30039948-30491156	Cacna1d	0.746166	2.2583	2.19677	2.01704	1.17188	1.72346e-08	D;K;O	Positive	P1;P12;P4	Calcium-mediated processing;Insulin processing and signaling;Ion transport and homeostasis;Membrane potential and Ion channels	Adhesion, communication, aggregation and migration;Binding;Biological regulation and behavior;Cellular component organization or biogenesis;Disease;Environmental information processing, response to stimulus and signaling;Localization and transport;Membrane;System process	GO:0005262;GO:0005737;GO:0005887;GO:0007166;GO:0022843;GO:0032991;GO:0044707;GO:0046872;GO:0048518;GO:0051393;GO:0060306;GO:0070588;path:mmu04020;path:mmu04270;path:mmu04726;path:mmu04930;path:mmu04973	alpha-actinin binding;calcium channel activity;calcium ion transmembrane transport;Calcium signaling pathway - Mus musculus (mouse);Carbohydrate digestion and absorption - Mus musculus (mouse);cell surface receptor signaling pathway;cytoplasm;integral component of plasma membrane;macromolecular complex;metal ion binding;positive regulation of biological process;regulation of membrane repolarizati…
gene:ENSMUSG00000084902	chr14:13814948-13914478	Gm281	5.11882	8.65267	7.34432	6.77614	6.90547	1.78971e-08	D	Positive	P1	Calcium-mediated processing	Adhesion, communication, aggregation and migration;Binding;Membrane	GO:0005509;GO:0007156;GO:0016021	calcium ion binding;homophilic cell adhesion via plasma membrane adhesion molecules;integral component of membrane
gene:ENSMUSG00000031906	chr8:106252547-106337988	Smpd3	1.99358	2.62928	2.78893	2.33817	2.22144	1.8503e-08	A;D	Positive	E15.5_Ngn3_Het;P1	Vesicle-mediated transport and secretion by cell	Binding;Biological regulation and behavior;Biosynthesis and Catalytical activity;Developmental process and reproduction;Environmental information processing, response to stimulus and signaling;Localization and transport;Membrane;Metabolism;Organelle	GO:0005795;GO:0005886;GO:0006644;GO:0006665;GO:0015833;GO:0016788;GO:0030097;GO:0030154;GO:0032940;GO:0043603;GO:0044281;GO:0046872;GO:0050789;GO:0050896;GO:0065008;GO:0098588;REACT_125914	bounding membrane of organelle;cell differentiation;cellular amide metabolic process;Glycosphingolipid metabolism;Golgi stack;hemopoiesis;hydrolase activity, acting on ester bonds;metal ion binding;peptide transport;phospholipid metabolic process;plasma membrane;regulation of biological process;regulation of biological quality;response to stimulus;secretion by cell;small molecule metabolic proces…
gene:ENSMUSG00000028015	chr3:81932600-81956725	Ctso	1.67789	2.35981	2.62523	2.59057	2.08821	1.89936e-08	A;D	Positive	E15.5_Ngn3_Het;P1	Unclassified	Biosynthesis and Catalytical activity;Metabolism;Organelle	GO:0005773;GO:0008152;GO:0016787;path:mmu04142	hydrolase activity;Lysosome - Mus musculus (mouse);metabolic process;vacuole
gene:ENSMUSG00000053465	chr14:119138414-119869594	Hs6st3	5.67567	6.78388	7.2219	6.63939	5.51508	1.90123e-08	A;D	Positive	E15.5_Ngn3_Het;P1	Unclassified	Biosynthesis and Catalytical activity;Membrane;Metabolism	GO:0006790;GO:0009101;GO:0016021;GO:0016740;GO:0044281;GO:0044711	glycoprotein biosynthetic process;integral component of membrane;single-organism biosynthetic process;small molecule metabolic process;sulfur compound metabolic process;transferase activity
gene:ENSMUSG00000039683	chr5:141241489-142215586	Sdk1	3.39962	4.08221	3.66048	3.45662	0.698567	1.91951e-08	B;E	Positive	E15.5_Ngn3_Het;P1	Unclassified	Adhesion, communication, aggregation and migration;Binding;Membrane;Organelle	GO:0005515;GO:0007155;GO:0016021;GO:0070062	cell adhesion;extracellular vesicular exosome;integral component of membrane;protein binding
gene:ENSMUSG00000009292	chr10:77907721-77970563	Trpm2	3.17476	4.89104	5.04408	4.50463	3.60557	1.93111e-08	D	Positive	P1	Ion transport and homeostasis;Membrane potential and Ion channels	Biosynthesis and Catalytical activity;Localization and transport;Membrane;Metabolism	GO:0005216;GO:0005886;GO:0008152;GO:0015077;GO:0016021;GO:0016462;GO:0035725;GO:0046915;GO:0070588;GO:0072509;REACT_94160	calcium ion transmembrane transport;divalent inorganic cation transmembrane transporter activity;integral component of membrane;ion channel activity;metabolic process;monovalent inorganic cation transmembrane transporter activity;plasma membrane;pyrophosphatase activity;sodium ion transmembrane transport;transition metal ion transmembrane transporter activity;Transmembrane transport of small mole…
gene:ENSMUSG00000054320	chr8:105413570-105464086	Lrrc36	2.89816	6.64097	6.60708	7.01164	6.31391	1.95479e-08	D	Positive	P1			Singleton	Singleton
gene:ENSMUSG00000023224	chr2:84765386-84775444	Serping1	4.30617	4.30231	3.46143	3.59137	2.14318	1.95983e-08	A	Positive	E15.5_Ngn3_Het	Unclassified	Biological regulation and behavior;Environmental information processing, response to stimulus and signaling;Metabolism;Organelle	GO:0032268;GO:0043226;GO:0048585;GO:0065009	negative regulation of response to stimulus;organelle;regulation of cellular protein metabolic process;regulation of molecular function
gene:ENSMUSG00000048249	chr17:26715649-26776635	Crebrf	1.44144	2.68252	1.99194	2.36924	2.74623	1.97693e-08	D;U	Positive	P1;P60	Unclassified	Binding;Biosynthesis and Catalytical activity;Environmental information processing, response to stimulus and signaling;Genetic Information process;Localization and transport	GO:0003677;GO:0003700;GO:0005515;GO:0005634;GO:0032388;GO:0034976;GO:0048583;GO:1901576	DNA binding;nucleus;organic substance biosynthetic process;positive regulation of intracellular transport;protein binding;regulation of response to stimulus;response to endoplasmic reticulum stress;sequence-specific DNA binding transcription factor activity
gene:ENSMUSG00000044349	chr2:158375637-158386145	Snhg11	1.22472	3.4746	3.32155	5.7475	8.306	1.9776e-08	V	Positive	P60			Singleton	Singleton
gene:ENSMUSG00000093661	chr6:99625134-99666771	Eif4e3	2.93346	3.84042	3.78007	3.53549	2.97406	2.01061e-08	A;D;O	Positive	E15.5_Ngn3_Het;P1;P12	Unclassified	Biosynthesis and Catalytical activity;Cellular component organization or biogenesis;Genetic Information process;Immune system;Metabolism	GO:0003723;GO:0005737;GO:0010467;GO:0019538;GO:0034645;GO:0043234;GO:0080090;GO:2000112;REACT_127785	cellular macromolecule biosynthetic process;cytoplasm;gene expression;Interferon Signaling;protein complex;protein metabolic process;regulation of cellular macromolecule biosynthetic process;regulation of primary metabolic process;RNA binding
gene:ENSMUSG00000045038	chr17:86167784-86657919	Prkce	0.910196	2.30761	2.51089	2.48814	1.57842	2.02735e-08	D;O	Positive	P1;P12	GTPase and G-protein activity;Insulin processing and signaling;Ion transport and homeostasis;Oxidation-reduction and Oxygen-mediated activity;Protein tyrosine and serine/threonine kinase activity;Vesicle-mediated transport and secretion by cell	Adhesion, communication, aggregation and migration;Binding;Biological regulation and behavior;Biosynthesis and Catalytical activity;Cell cycle, proliferation, growth and death;Cellular component organization or biogenesis;Disease;Environmental information processing, response to stimulus and signaling;Genetic Information process;Immune system;Localization and transport;Membrane;Metabolism;System …	GO:0001666;GO:0001932;GO:0002793;GO:0003779;GO:0004697;GO:0004713;GO:0005524;GO:0005634;GO:0005739;GO:0005886;GO:0006468;GO:0006875;GO:0007155;GO:0007166;GO:0007635;GO:0010564;GO:0010675;GO:0012505;GO:0019899;GO:0030155;GO:0031347;GO:0033238;GO:0035556;GO:0035640;GO:0042327;GO:0043085;GO:0043408;GO:0045321;GO:0046872;GO:0046887;GO:0050796;GO:0051240;GO:0051495;GO:0055074;GO:0070838;GO:0072503;GO:…	actin binding;ATP binding;calcium ion homeostasis;cell adhesion;cell surface receptor signaling pathway;cellular divalent inorganic cation homeostasis;cellular metal ion homeostasis;chemosensory behavior;Disease;divalent metal ion transport;Effects of PIP2 hydrolysis;endomembrane system;enzyme binding;exploration behavior;G alpha (q) signalling events;Gastrin-CREB signalling pathway via PKC and M…
gene:ENSMUSG00000027947	chr3:89869323-89913162	Il6ra	1.1311	2.90155	2.98159	3.58706	2.26703	2.10617e-08	D;O	Positive	P1;P12	Unclassified	Binding;Biological regulation and behavior;Environmental information processing, response to stimulus and signaling;Membrane;Metabolism	GO:0001932;GO:0004896;GO:0019221;GO:0031224;GO:0031401;GO:0033238;GO:0042327;GO:0042803;GO:0043408;GO:0044459;GO:0051240;GO:0051241;GO:0070851;GO:1902533	cytokine-mediated signaling pathway;cytokine receptor activity;growth factor receptor binding;intrinsic component of membrane;negative regulation of multicellular organismal process;plasma membrane part;positive regulation of intracellular signal transduction;positive regulation of multicellular organismal process;positive regulation of phosphorylation;positive regulation of protein modification …
gene:ENSMUSG00000030283	chr6:142821544-142964452	St8sia1	-0.152206	3.6235	5.23446	5.79207	4.0186	2.1264e-08	Q	Positive	P12			Singleton	Singleton
gene:ENSMUSG00000023868	chr17:8525371-8986648	Pde10a	2.12254	4.08126	5.00848	4.91492	6.08303	2.17895e-08	D;U	Positive	P1;P60	Unclassified	Binding;Biosynthesis and Catalytical activity;Cellular component organization or biogenesis;Environmental information processing, response to stimulus and signaling;Metabolism	GO:0005515;GO:0005737;GO:0006198;GO:0007165;GO:0023051;GO:0032559;GO:0042578;GO:0043168;GO:0046068;GO:0046872	adenyl ribonucleotide binding;anion binding;cAMP catabolic process;cGMP metabolic process;cytoplasm;metal ion binding;phosphoric ester hydrolase activity;protein binding;regulation of signaling;signal transduction
gene:ENSMUSG00000019944	chr10:69151433-69291791	Rhobtb1	0.255034	1.78397	2.41176	2.69951	2.84084	2.20573e-08	O;U	Positive	P12;P60	Unclassified	Binding;Environmental information processing, response to stimulus and signaling;Localization and transport	GO:0007165;GO:0032550;GO:0033036;GO:0035639	macromolecule localization;purine ribonucleoside binding;purine ribonucleoside triphosphate binding;signal transduction
gene:ENSMUSG00000033427	chr10:75406910-75441679	Upb1	2.26488	3.99812	3.72382	4.5639	5.21229	2.25934e-08	D;U	Positive	P1;P60	Oxoacid metabolic process and Fatty acid activity	Binding;Biosynthesis and Catalytical activity;Cellular component organization or biogenesis;Metabolism;Organelle	GO:0005737;GO:0006520;GO:0016787;GO:0044711;GO:0046872;GO:0070062;GO:1901576;REACT_112621	cellular amino acid metabolic process;cytoplasm;extracellular vesicular exosome;hydrolase activity;Metabolism;metal ion binding;organic substance biosynthetic process;single-organism biosynthetic process
gene:ENSMUSG00000086605	chr2:167098793-167101826	Gm14290	2.98551	5.42173	5.12832	5.79946	5.07015	2.32848e-08	D	Positive	P1			Singleton	Singleton
gene:ENSMUSG00000024190	chr17:26505589-26508519	Dusp1	0.819803	1.74485	2.63754	0.98827	2.6903	2.38213e-08	D;U	Positive	P1;P60	Unclassified	Biosynthesis and Catalytical activity;Environmental information processing, response to stimulus and signaling	GO:0033549;GO:0033574	MAP kinase phosphatase activity;response to testosterone
gene:ENSMUSG00000032997	chr1:75474568-75479471	Chpf	0.887783	1.72249	2.00101	1.96911	2.70636	2.41745e-08	D;U	Positive	P1;P60	Unclassified	Binding;Biosynthesis and Catalytical activity;Cellular component organization or biogenesis;Disease;Membrane;Metabolism	GO:0005515;GO:0005759;GO:0005829;GO:0008376;GO:0016021;GO:0032580;GO:0046872;REACT_102834;REACT_118324	acetylgalactosaminyltransferase activity;cytosol;Disease;Golgi cisterna membrane;integral component of membrane;Metabolism of carbohydrates;metal ion binding;mitochondrial matrix;protein binding
gene:ENSMUSG00000037685	chr5:67618139-67847432	Atp8a1	0.513926	1.95546	2.00179	2.57893	2.91839	2.44584e-08	D;O;U	Positive	P1;P12;P60	Unclassified	Adhesion, communication, aggregation and migration;Binding;Biological regulation and behavior;Cellular component organization or biogenesis;Localization and transport;Membrane;Organelle;System process	GO:0000287;GO:0005515;GO:0005548;GO:0005783;GO:0005794;GO:0005886;GO:0007612;GO:0016021;GO:0030334;GO:0031988;GO:0032550;GO:0032559;GO:0033036;GO:0035639;GO:0042626;GO:0044433;GO:0044763;GO:0051130;GO:0065008;GO:0071702;GO:0098588	adenyl ribonucleotide binding;ATPase activity, coupled to transmembrane movement of substances;bounding membrane of organelle;cytoplasmic vesicle part;endoplasmic reticulum;Golgi apparatus;integral component of membrane;learning;macromolecule localization;magnesium ion binding;membrane-bounded vesicle;organic substance transport;phospholipid transporter activity;plasma membrane;positive regulatio…
gene:ENSMUSG00000020376	chr11:50025345-50104758	Rnf130	1.84497	1.92694	1.7673	1.40665	2.19279	2.47396e-08	U	Positive	P60	Unclassified	Binding;Biosynthesis and Catalytical activity;Metabolism	GO:0006464;GO:0016740;GO:0016874;GO:0044763;GO:0046872	cellular protein modification process;ligase activity;metal ion binding;single-organism cellular process;transferase activity
gene:ENSMUSG00000051510	chr11:120625116-120633600	Mafg	1.13768	2.12939	1.8647	1.57327	1.72398	2.47721e-08	D	Positive	P1	Ion transport and homeostasis	Binding;Biological regulation and behavior;Biosynthesis and Catalytical activity;Cell cycle, proliferation, growth and death;Developmental process and reproduction;Genetic Information process	GO:0001701;GO:0003677;GO:0005634;GO:0006351;GO:0030004;GO:0030534;GO:0042127;GO:0045595;GO:0046982;GO:1903506;GO:2000112	adult behavior;cellular monovalent inorganic cation homeostasis;DNA binding;in utero embryonic development;nucleus;protein heterodimerization activity;regulation of cell differentiation;regulation of cell proliferation;regulation of cellular macromolecule biosynthetic process;regulation of nucleic acid-templated transcription;transcription, DNA-templated
gene:ENSMUSG00000071073	chr17:46254164-46257316	Lrrc73	3.01913	4.49599	4.73358	4.58461	5.08845	2.47981e-08	D	Positive	P1			Singleton	Singleton
gene:ENSMUSG00000069170	chr13:81095067-81633154	Gpr98	3.16821	4.76067	4.21111	4.00225	1.17406	2.52483e-08	D;E	Positive	P1	Unclassified	Adhesion, communication, aggregation and migration;Biological regulation and behavior;Cellular component organization or biogenesis;Developmental process and reproduction;Environmental information processing, response to stimulus and signaling;Membrane;Organelle	GO:0005737;GO:0007154;GO:0007155;GO:0009605;GO:0009986;GO:0030154;GO:0042592;GO:0043235;GO:0044425;GO:0045596;GO:0048839;GO:0051716;GO:0070062	cell adhesion;cell communication;cell differentiation;cell surface;cellular response to stimulus;cytoplasm;extracellular vesicular exosome;homeostatic process;inner ear development;membrane part;negative regulation of cell differentiation;receptor complex;response to external stimulus
gene:ENSMUSG00000070577	chr4:148643316-148671572	Gm572	3.19311	3.91685	3.51118	3.07154	2.85331	2.5718e-08	D	Positive	P1			Singleton	Singleton
gene:ENSMUSG00000075254	chr16:33684465-33771576	Heg1	1.01516	3.19982	2.72543	3.01393	1.31695	2.58249e-08	D	Positive	P1	Unclassified	Adhesion, communication, aggregation and migration;Binding;Membrane	GO:0005515;GO:0007043;GO:0009986;GO:0044459;GO:0044707	cell-cell junction assembly;cell surface;plasma membrane part;protein binding;single-multicellular organism process
gene:ENSMUSG00000025867	chr13:54371348-54383917	Cplx2	1.42397	2.09495	1.99274	1.99802	0.975339	2.58386e-08	D;O	Positive	P1;P12	Vesicle-mediated transport and secretion by cell	Adhesion, communication, aggregation and migration;Binding;Biological regulation and behavior;Cellular component organization or biogenesis;Developmental process and reproduction;Environmental information processing, response to stimulus and signaling;Localization and transport;Membrane;Organelle	GO:0005829;GO:0016192;GO:0017075;GO:0030154;GO:0031201;GO:0043231;GO:0044297;GO:0045202;GO:0046903;GO:0048167;GO:0048731;GO:0050896;GO:0051648;GO:0051656;GO:1902582	cell body;cell differentiation;cytosol;establishment of organelle localization;intracellular membrane-bounded organelle;regulation of synaptic plasticity;response to stimulus;secretion;single-organism intracellular transport;SNARE complex;synapse;syntaxin-1 binding;system development;vesicle-mediated transport;vesicle localization
gene:ENSMUSG00000035112	chr11:101260566-101277409	Wnk4	2.02763	2.55541	2.68377	2.18962	1.68383	2.60929e-08	D;O	Positive	P1;P12	Ion transport and homeostasis;Protein tyrosine and serine/threonine kinase activity	Binding;Biological regulation and behavior;Biosynthesis and Catalytical activity;Developmental process and reproduction;Environmental information processing, response to stimulus and signaling;Localization and transport;Metabolism	GO:0004713;GO:0006464;GO:0015672;GO:0030001;GO:0032550;GO:0032559;GO:0035556;GO:0035639;GO:0048731;GO:0060562;GO:0065008	adenyl ribonucleotide binding;cellular protein modification process;epithelial tube morphogenesis;intracellular signal transduction;metal ion transport;monovalent inorganic cation transport;protein tyrosine kinase activity;purine ribonucleoside binding;purine ribonucleoside triphosphate binding;regulation of biological quality;system development
gene:ENSMUSG00000073411	chr17:35262729-35267499	H2-D1	0.648003	1.84911	1.93874	2.03018	2.05634	2.61289e-08	D;K;U	Positive	P1;P4;P60	Insulin processing and signaling;Vesicle-mediated transport and secretion by cell	Adhesion, communication, aggregation and migration;Binding;Disease;Immune system;Localization and transport;Membrane;Organelle	GO:0001916;GO:0002485;GO:0005102;GO:0006955;GO:0009897;GO:0030139;GO:0030659;GO:0042277;GO:0042612;GO:0071556;path:mmu04144;path:mmu04514;path:mmu04612;path:mmu04650;path:mmu04940;path:mmu05168;path:mmu05203;path:mmu05320;path:mmu05330;path:mmu05332;path:mmu05416;REACT_107426;REACT_111008;REACT_129705;REACT_144862;REACT_86224	Allograft rejection - Mus musculus (mouse);Antigen Presentation: Folding, assembly and peptide loading of class I MHC;Antigen processing-Cross presentation;Antigen processing and presentation - Mus musculus (mouse);antigen processing and presentation of endogenous peptide antigen via MHC class I via ER pathway, TAP-dependent;Autoimmune thyroid disease - Mus musculus (mouse);Cell adhesion molecule…
gene:ENSMUSG00000006273	chr8:69088645-69113711	Atp6v1b2	1.10275	2.15279	1.80156	1.54716	1.85091	2.63256e-08	D;U	Positive	P1;P60	Insulin processing and signaling;Ion transport and homeostasis;Vesicle-mediated transport and secretion by cell	Adhesion, communication, aggregation and migration;Binding;Cellular component organization or biogenesis;Developmental process and reproduction;Disease;Environmental information processing, response to stimulus and signaling;Immune system;Localization and transport;Membrane;Metabolism;Organelle	GO:0005524;GO:0005765;GO:0005829;GO:0005886;GO:0005902;GO:0006163;GO:0009119;GO:0009161;GO:0009259;GO:0015991;GO:0016021;GO:0016820;GO:0031252;GO:0042470;GO:0070062;path:mmu04145;path:mmu04721;path:mmu04966;path:mmu05323;REACT_101230;REACT_118324;REACT_126778;REACT_146500;REACT_146901;REACT_80574;REACT_81379;REACT_94160	ATP binding;ATP hydrolysis coupled proton transport;cell leading edge;Collecting duct acid secretion - Mus musculus (mouse);cytosol;Disease;extracellular vesicular exosome;hydrolase activity, acting on acid anhydrides, catalyzing transmembrane movement of substances;Insulin receptor recycling;integral component of membrane;Iron uptake and transport;Latent infection of Homo sapiens with Mycobacter…
gene:ENSMUSG00000002413	chr6:39603236-39725463	Braf	1.06463	2.10129	1.74053	1.83436	1.37367	2.67135e-08	D;O	Positive	P1;P12	Calcium-mediated processing;Protein tyrosine and serine/threonine kinase activity;Vesicle-mediated transport and secretion by cell	Adhesion, communication, aggregation and migration;Binding;Biological regulation and behavior;Biosynthesis and Catalytical activity;Cell cycle, proliferation, growth and death;Cellular component organization or biogenesis;Developmental process and reproduction;Disease;Environmental information processing, response to stimulus and signaling;Genetic Information process;Immune system;Localization an…	GO:0001932;GO:0002244;GO:0004674;GO:0004713;GO:0004871;GO:0005509;GO:0005524;GO:0005739;GO:0006468;GO:0009628;GO:0010628;GO:0014070;GO:0019901;GO:0022604;GO:0030155;GO:0030336;GO:0031401;GO:0033238;GO:0035556;GO:0042127;GO:0042802;GO:0042995;GO:0043066;GO:0043367;GO:0043549;GO:0044297;GO:0045595;GO:0046983;GO:0048864;GO:0051093;GO:0051347;GO:0051495;GO:0051592;GO:0060291;GO:0065003;GO:0070374;GO:…	Acute myeloid leukemia - Mus musculus (mouse);ATP binding;calcium ion binding;CD4-positive, alpha-beta T cell differentiation;cell body;cell projection;Chemokine signaling pathway - Mus musculus (mouse);Colorectal cancer - Mus musculus (mouse);Endometrial cancer - Mus musculus (mouse);hematopoietic progenitor cell differentiation;identical protein binding;intracellular signal transduction;long-te…
gene:ENSMUSG00000042675	chr7:126776954-126780514	Ypel3	2.0453	2.25931	2.02984	2.03348	2.22022	2.67944e-08	A	Positive	E15.5_Ngn3_Het	Unclassified	Cell cycle, proliferation, growth and death;Genetic Information process	GO:0005730;GO:0008219	cell death;nucleolus
gene:ENSMUSG00000036957	chr7:30355513-30362772	Lrfn3	1.33506	2.61855	2.5106	2.53343	1.83814	2.71811e-08	D	Positive	P1	Unclassified	Adhesion, communication, aggregation and migration;Binding;Cellular component organization or biogenesis;Membrane	GO:0005515;GO:0007155;GO:0030054;GO:0042734;GO:0042995;GO:0045211	cell adhesion;cell junction;cell projection;postsynaptic membrane;presynaptic membrane;protein binding
gene:ENSMUSG00000070287	chr9:100552192-100571085	Slc35g2	2.03788	3.13024	3.51331	3.00519	3.86834	2.72279e-08	D	Positive	P1	Unclassified	Membrane;Organelle	GO:0005794;GO:0016021	Golgi apparatus;integral component of membrane
gene:ENSMUSG00000052387	chr19:22139118-22989884	Trpm3	2.67625	5.10862	5.54607	4.71537	5.84049	2.78135e-08	D	Positive	P1	Ion transport and homeostasis;Membrane potential and Ion channels	Localization and transport;Membrane	GO:0005261;GO:0016021;GO:0034220;REACT_163135;REACT_94109;REACT_94160	cation channel activity;integral component of membrane;Ion channel transport;ion transmembrane transport;Stimuli-sensing channels;Transmembrane transport of small molecules
gene:ENSMUSG00000053334	chr5:113735781-113740600	Ficd	0.811236	2.21619	2.67735	2.49427	2.79328	2.83316e-08	D;U	Positive	P1;P60	Unclassified	Binding;Biosynthesis and Catalytical activity;Membrane;Metabolism	GO:0005515;GO:0005524;GO:0006464;GO:0016021;GO:0016740	ATP binding;cellular protein modification process;integral component of membrane;protein binding;transferase activity
gene:ENSMUSG00000090877	chr17:34956435-34959238	Hspa1b	1.85638	1.24153	5.01633	0.582266	8.3545	2.8383e-08	X	Positive	P60			Singleton	Singleton
gene:ENSMUSG00000042638	chr6:136697284-136781765	Gucy2c	2.32518	4.01975	4.80924	3.86109	5.64952	2.86215e-08	D;U	Positive	P1;P60	Protein tyrosine and serine/threonine kinase activity	Binding;Biosynthesis and Catalytical activity;Environmental information processing, response to stimulus and signaling;Membrane;Metabolism;Organelle	GO:0004713;GO:0005515;GO:0005524;GO:0005525;GO:0005886;GO:0006468;GO:0007165;GO:0009636;GO:0044432;GO:0044711;GO:0046068;GO:0098588;GO:0098589	ATP binding;bounding membrane of organelle;cGMP metabolic process;endoplasmic reticulum part;GTP binding;membrane region;plasma membrane;protein binding;protein phosphorylation;protein tyrosine kinase activity;response to toxic substance;signal transduction;single-organism biosynthetic process
gene:ENSMUSG00000020212	chr10:118141786-118168997	Mdm1	1.6977	2.72506	2.12253	1.68017	1.50727	2.87146e-08	D	Positive	P1	Unclassified	Cellular component organization or biogenesis	GO:0005622	intracellular
gene:ENSMUSG00000002578	chr10:128630842-128645991	Ikzf4	1.51087	3.24632	3.26942	3.38755	3.5502	2.87884e-08	D;U	Positive	P1;P60	Unclassified	Binding;Genetic Information process	GO:0005634;GO:0006351;GO:0042803;GO:0043565;GO:0045892;GO:0045944;GO:0046872;GO:0046982	metal ion binding;negative regulation of transcription, DNA-templated;nucleus;positive regulation of transcription from RNA polymerase II promoter;protein heterodimerization activity;protein homodimerization activity;sequence-specific DNA binding;transcription, DNA-templated
gene:ENSMUSG00000026944	chr2:25428702-25448540	Abca2	0.844511	1.80024	1.99675	2.17648	1.9641	2.88013e-08	D;U	Positive	P1;P60	Unclassified	Binding;Biological regulation and behavior;Biosynthesis and Catalytical activity;Environmental information processing, response to stimulus and signaling;Genetic Information process;Localization and transport;Membrane;Organelle	GO:0005524;GO:0005764;GO:0005768;GO:0006357;GO:0016020;GO:0016887;GO:0048545;GO:0051049;GO:0055088;path:mmu02010	ABC transporters - Mus musculus (mouse);ATP binding;ATPase activity;endosome;lipid homeostasis;lysosome;membrane;regulation of transcription from RNA polymerase II promoter;regulation of transport;response to steroid hormone
gene:ENSMUSG00000019876	chr10:57631980-57741112	Pkib	3.57582	5.05169	4.26046	3.88539	4.61676	2.88328e-08	D	Positive	P1	Protein tyrosine and serine/threonine kinase activity	Biosynthesis and Catalytical activity;Metabolism	GO:0016301;GO:0016310;GO:0030291;GO:2000480	kinase activity;negative regulation of cAMP-dependent protein kinase activity;phosphorylation;protein serine/threonine kinase inhibitor activity
gene:ENSMUSG00000034145	chr12:87021339-87090043	Tmem63c	4.82722	6.66704	6.7814	6.72784	8.81258	3.01729e-08	D;U	Positive	P1;P60	Membrane potential and Ion channels	Localization and transport;Membrane	GO:0005261;GO:0031224;GO:0044699	cation channel activity;intrinsic component of membrane;single-organism process
gene:ENSMUSG00000045349	chr4:138250402-138261332	Sh2d5	4.70532	4.64188	4.23386	2.45071	2.45017	3.05246e-08	A	Positive	E15.5_Ngn3_Het	Unclassified	Binding	GO:0005515	protein binding
gene:ENSMUSG00000044348	chrX:136981115-137038302	Slc25a53	3.08249	3.2636	2.79692	2.5348	1.27988	3.09842e-08	A	Positive	E15.5_Ngn3_Het	Unclassified	Membrane	GO:0016021	integral component of membrane
gene:ENSMUSG00000063296	chr15:94629184-95096097	Tmem117	2.02646	4.27783	4.62034	4.04504	4.83481	3.19468e-08	D;U	Positive	P1;P60	Unclassified	Membrane;Organelle	GO:0005783;GO:0016021	endoplasmic reticulum;integral component of membrane
gene:ENSMUSG00000027254	chr2:121289599-121310832	Map1a	3.98928	3.42167	3.35052	2.28316	1.97035	3.1958e-08	A	Positive	E15.5_Ngn3_Het	Unclassified	Binding;Biosynthesis and Catalytical activity;Cellular component organization or biogenesis;System process	GO:0005515;GO:0005737;GO:0005856;GO:0009987;GO:0016787;GO:0050877	cellular process;cytoplasm;cytoskeleton;hydrolase activity;neurological system process;protein binding
gene:ENSMUSG00000039661	chr8:31089470-31097047	Dusp26	2.60331	5.89793	5.32195	6.37776	4.75395	3.22975e-08	D;O	Positive	P1;P12	Unclassified	Adhesion, communication, aggregation and migration;Biosynthesis and Catalytical activity;Cellular component organization or biogenesis;Environmental information processing, response to stimulus and signaling;Genetic Information process;Metabolism;Organelle	GO:0001085;GO:0001932;GO:0004721;GO:0005634;GO:0005739;GO:0006470;GO:0031400;GO:0031401;GO:0033613;GO:0042326;GO:0043086;GO:0043408;GO:0043549;GO:0045785;GO:0070062;GO:1902532;GO:1903506	activating transcription factor binding;extracellular vesicular exosome;mitochondrion;negative regulation of catalytic activity;negative regulation of intracellular signal transduction;negative regulation of phosphorylation;negative regulation of protein modification process;nucleus;phosphoprotein phosphatase activity;positive regulation of cell adhesion;positive regulation of protein modificatio…
gene:ENSMUSG00000032238	chr9:68653785-69388246	Rora	0.173475	2.77509	2.74278	2.89155	2.64584	3.25363e-08	D;P;U	Positive	P1;P12;P60	Oxidation-reduction and Oxygen-mediated activity	Binding;Biological regulation and behavior;Biosynthesis and Catalytical activity;Developmental process and reproduction;Environmental information processing, response to stimulus and signaling;Genetic Information process;Immune system;Metabolism;Organelle	GO:0000981;GO:0001666;GO:0002521;GO:0002682;GO:0003707;GO:0005515;GO:0005634;GO:0006355;GO:0006805;GO:0008270;GO:0009117;GO:0010467;GO:0010628;GO:0019216;GO:0030522;GO:0032844;GO:0032922;GO:0034645;GO:0042110;GO:0042752;GO:0043401;GO:0043565;GO:0045595;GO:0048646;GO:0050865;GO:0051240;GO:0055088;GO:0070013;GO:0072521;GO:0097659;GO:1901135;GO:1901700;GO:1902532;GO:1902680;REACT_85098;REACT_99688	anatomical structure formation involved in morphogenesis;carbohydrate derivative metabolic process;cellular macromolecule biosynthetic process;circadian regulation of gene expression;gene expression;Generic Transcription Pathway;intracellular organelle lumen;intracellular receptor signaling pathway;leukocyte differentiation;lipid homeostasis;negative regulation of intracellular signal transductio…
gene:ENSMUSG00000053025	chr7:75114896-75309262	Sv2b	4.0195	4.77665	5.63931	5.53419	4.93674	3.25682e-08	D	Positive	P1	Vesicle-mediated transport and secretion by cell	Adhesion, communication, aggregation and migration;Localization and transport;Membrane;Organelle	GO:0007268;GO:0016021;GO:0030054;GO:0030141;GO:0030672;GO:0055085	cell junction;integral component of membrane;secretory granule;synaptic transmission;synaptic vesicle membrane;transmembrane transport
gene:ENSMUSG00000030117	chr6:122605402-122610087	Gdf3	-1.36651	5.74382	4.44517	4.30585	8.98904	3.3042e-08	V	Positive	P60			Singleton	Singleton
gene:ENSMUSG00000039911	chr4:149896282-149955043	Spsb1	3.73633	4.55646	4.30086	3.51588	1.06968	3.30592e-08	B;E;L	Positive	E15.5_Ngn3_Het;P1;P4	Unclassified	Adhesion, communication, aggregation and migration;Binding;Biological regulation and behavior;Cellular component organization or biogenesis;Environmental information processing, response to stimulus and signaling;Metabolism	GO:0005515;GO:0005737;GO:0007154;GO:0008152;GO:0050789;GO:0051716	cell communication;cellular response to stimulus;cytoplasm;metabolic process;protein binding;regulation of biological process
gene:ENSMUSG00000034853	chr4:106744554-106804998	Acot11	1.32413	3.43088	3.77381	3.72793	3.90811	3.31707e-08	D;U	Positive	P1;P60	Oxoacid metabolic process and Fatty acid activity	Biosynthesis and Catalytical activity;Cellular component organization or biogenesis;Environmental information processing, response to stimulus and signaling;Metabolism;Organelle	GO:0005737;GO:0006631;GO:0006950;GO:0009266;GO:0016788;GO:0035556;GO:0070062	cytoplasm;extracellular vesicular exosome;fatty acid metabolic process;hydrolase activity, acting on ester bonds;intracellular signal transduction;response to stress;response to temperature stimulus
gene:ENSMUSG00000027865	chr3:100162380-100206981	Gdap2	0.664861	2.13309	2.20224	1.73377	3.70953	3.33316e-08	U	Positive	P60	Unclassified	Cellular component organization or biogenesis	GO:0044444	cytoplasmic part
gene:ENSMUSG00000003476	chr6:55090048-55133016	Crhr2	7.40119	8.01321	6.27072	4.47616	2.48374	3.36842e-08	E	Positive	P1	Unclassified	Biological regulation and behavior;Cellular component organization or biogenesis;Localization and transport	GO:0009987;GO:0012505;GO:0044424;GO:0050794	cellular process;endomembrane system;intracellular part;regulation of cellular process
gene:ENSMUSG00000003379	chr7:24897380-24902197	Cd79a	2.02561	7.04244	5.79877	6.30987	3.58346	3.3744e-08	D	Positive	P1	Unclassified	Biological regulation and behavior;Cellular component organization or biogenesis;Environmental information processing, response to stimulus and signaling;Immune system;Localization and transport;Membrane	GO:0005737;GO:0007166;GO:0009986;GO:0012505;GO:0016021;GO:0032991;GO:0044459;GO:0044707;GO:0045321;GO:0048518;REACT_120644	cell surface;cell surface receptor signaling pathway;cytoplasm;endomembrane system;integral component of membrane;leukocyte activation;macromolecular complex;plasma membrane part;positive regulation of biological process;Signaling by the B Cell Receptor (BCR);single-multicellular organism process
gene:ENSMUSG00000040560	chr18:63708694-63989760	Wdr7	1.05356	2.23031	2.00737	1.98057	2.0937	3.44897e-08	D	Positive	P1	Unclassified	Binding;Developmental process and reproduction	GO:0002244;GO:0005515	hematopoietic progenitor cell differentiation;protein binding
gene:ENSMUSG00000003469	chr14:70457475-70468832	Phyhip	4.4335	4.82867	4.81793	4.5781	4.99596	3.45746e-08	D	Positive	P1	Unclassified	Binding	GO:0005515	protein binding
gene:ENSMUSG00000026473	chr1:153899943-153909723	Glul	1.39219	2.30902	1.93071	1.43056	0.527531	3.47422e-08	D;E	Positive	P1	Unclassified	Adhesion, communication, aggregation and migration;Biological regulation and behavior;Cellular component organization or biogenesis;Environmental information processing, response to stimulus and signaling;Organelle	GO:0005737;GO:0007154;GO:0009605;GO:0010033;GO:0050806;GO:0051716;GO:0070062;GO:1901700	cell communication;cellular response to stimulus;cytoplasm;extracellular vesicular exosome;positive regulation of synaptic transmission;response to external stimulus;response to organic substance;response to oxygen-containing compound
gene:ENSMUSG00000029467	chr5:122442701-122502225	Atp2a2	1.20516	2.43325	2.0816	1.85741	1.97738	3.51466e-08	D	Positive	P1	Ion transport and homeostasis;Membrane potential and Ion channels	Binding;Biological regulation and behavior;Disease;Environmental information processing, response to stimulus and signaling;Immune system;Localization and transport;Membrane;System process	GO:0005388;GO:0005524;GO:0006875;GO:0006937;GO:0006984;GO:0008022;GO:0016021;GO:0019899;GO:0033017;GO:0045822;GO:0046872;GO:0055074;GO:0070588;path:mmu05412;REACT_108918;REACT_32576;REACT_81688;REACT_93396;REACT_94109;REACT_94160	Arrhythmogenic right ventricular cardiomyopathy (ARVC) - Mus musculus (mouse);ATP binding;calcium-transporting ATPase activity;calcium ion homeostasis;calcium ion transmembrane transport;cellular metal ion homeostasis;enzyme binding;ER-nucleus signaling pathway;integral component of membrane;Ion channel transport;Ion transport by P-type ATPases;metal ion binding;negative regulation of heart contr…
[truncated: 4,047 more rows]
